# Supplementary material for: Fine mapping of the Cepaea nemoralis shell colour and mid-banded loci using a high-density linkage map
Source: Research Square preprint supplement (doi:10.21203/rs.3.rs-2760735/v1), 2023-04-28

**Table S4.** Overview of map positions within interval Y2, conforming to expected allele pattern for yellow phenotype. Two contigs are shared across the first and second position (tig00008644 and tig00045252), while one is shared between all three positions (tig00045252).

| Position (cM) | Contig      | No. SNPs |
|---------------|-------------|----------|
| 31.385        | ctg23821    | 9        |
|               | ctg31541    | 21       |
|               | ctg32869    | 1        |
|               | ctg56065    | 1        |
|               | tig00008644 | 20       |
|               | tig00045252 | 3        |
|               | tig00094642 | 55       |
|               | tig02169229 | 3        |
|               | tig02170041 | 74       |
| 32.056        | tig00045252 | 218      |
|               | tig00008644 | 78       |
| 32.727        | tig00045252 | 9        |

**Table S5.** Overview of the two map positions conforming to expected allele pattern for mid-banded phenotype in interval M2. Eight contigs (tig00399928, tig00395755, contig\_38459, ctg13129, ctg24871, ctg10236, tig00048729 and contig\_29810) are shared across both positions.

| <b>Position (cM)</b> | <b>Contig</b> | <b>No. SNPs</b> |
|----------------------|---------------|-----------------|
| <b>39.511</b>        | tig00399928   | 54              |
|                      | tig00395755   | 29              |
|                      | contig_38459  | 17              |
|                      | ctg13129      | 15              |
|                      | ctg24871      | 15              |
|                      | ctg10236      | 11              |
|                      | ctg32510      | 7               |
|                      | tig00048729   | 6               |
|                      | contig_29810  | 4               |
|                      | ctg14581      | 2               |
|                      | ctg39949      | 1               |
| <b>40.182</b>        | contig_38459  | 88              |
|                      | tig00399928   | 46              |
|                      | ctg13129      | 20              |
|                      | tig00395755   | 19              |
|                      | ctg9975       | 15              |
|                      | ctg4665       | 9               |
|                      | contig_29810  | 8               |
|                      | ctg24871      | 5               |
|                      | ctg10236      | 4               |
|                      | ctg11370      | 4               |
|                      | ctg15786      | 4               |
|                      | tig00048729   | 3               |
|                      | ctg12323      | 3               |
|                      | ctg27906      | 3               |
|                      | tig02174880   | 3               |
|                      | contig_23386  | 1               |
|                      | ctg11237      | 1               |
|                      | ctg43997      | 1               |

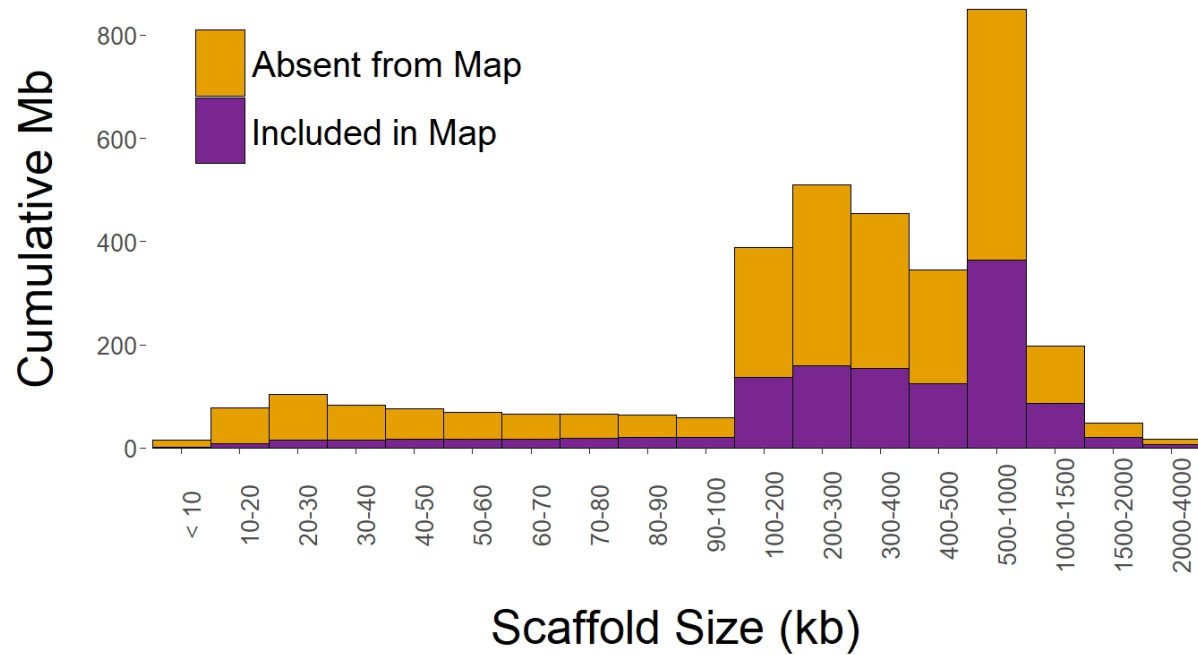

**Figure S2:** Comparison of the sizes of contigs from the *C.nemoralis* genome that were/were not included in the final linkage map.

**Figure S3:** Raw genotypes for all individuals, at all SNPs at each putative locus within yellow interval Y1, 1=yellow. None of these positions conform to the segregation pattern we expect to see between alleles for yellow phenotypes

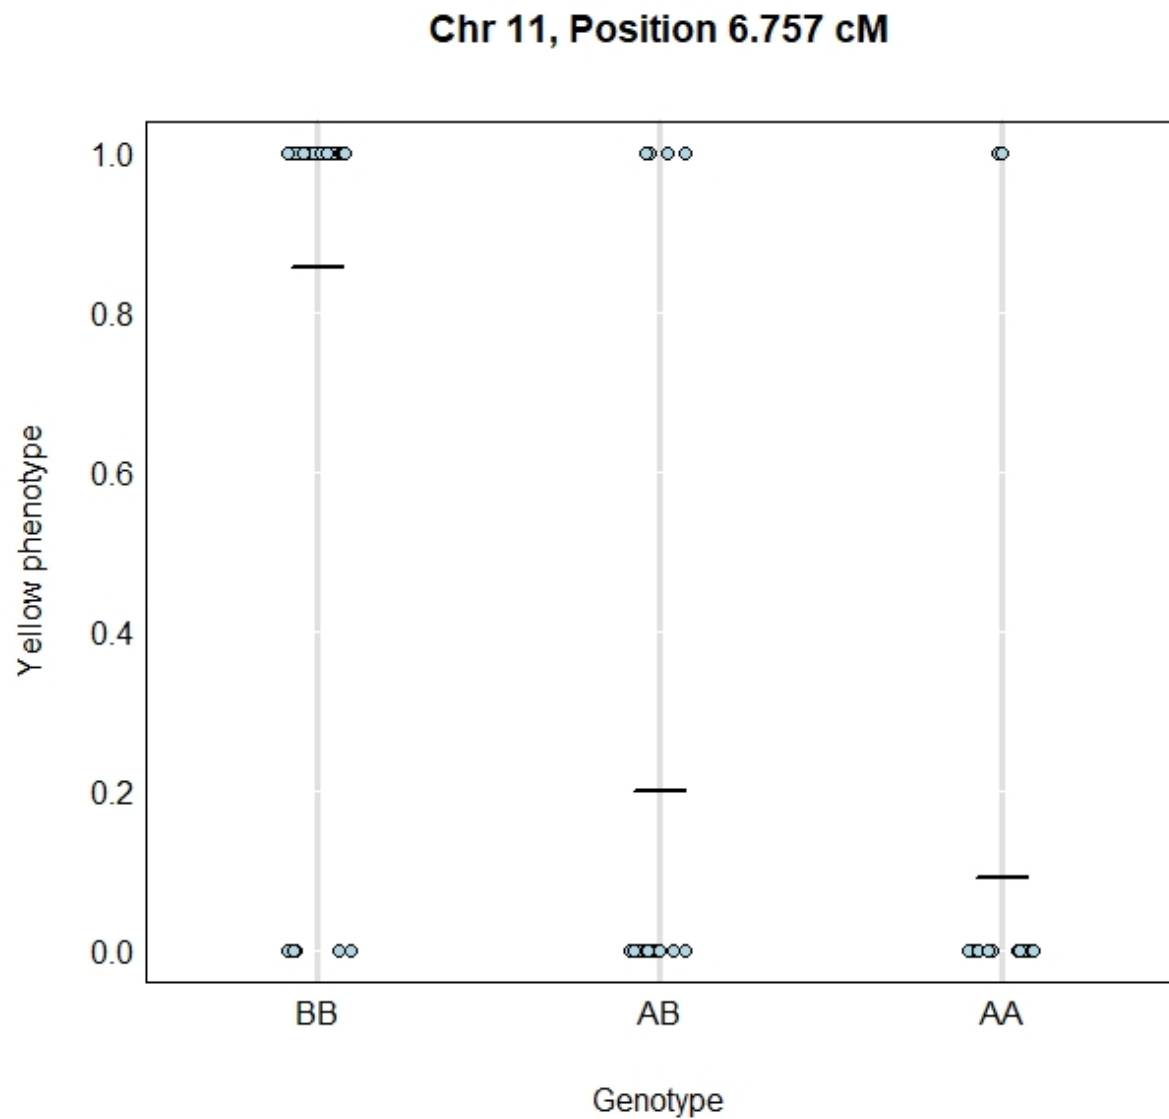

# Chr 11, Position 7.429 cM

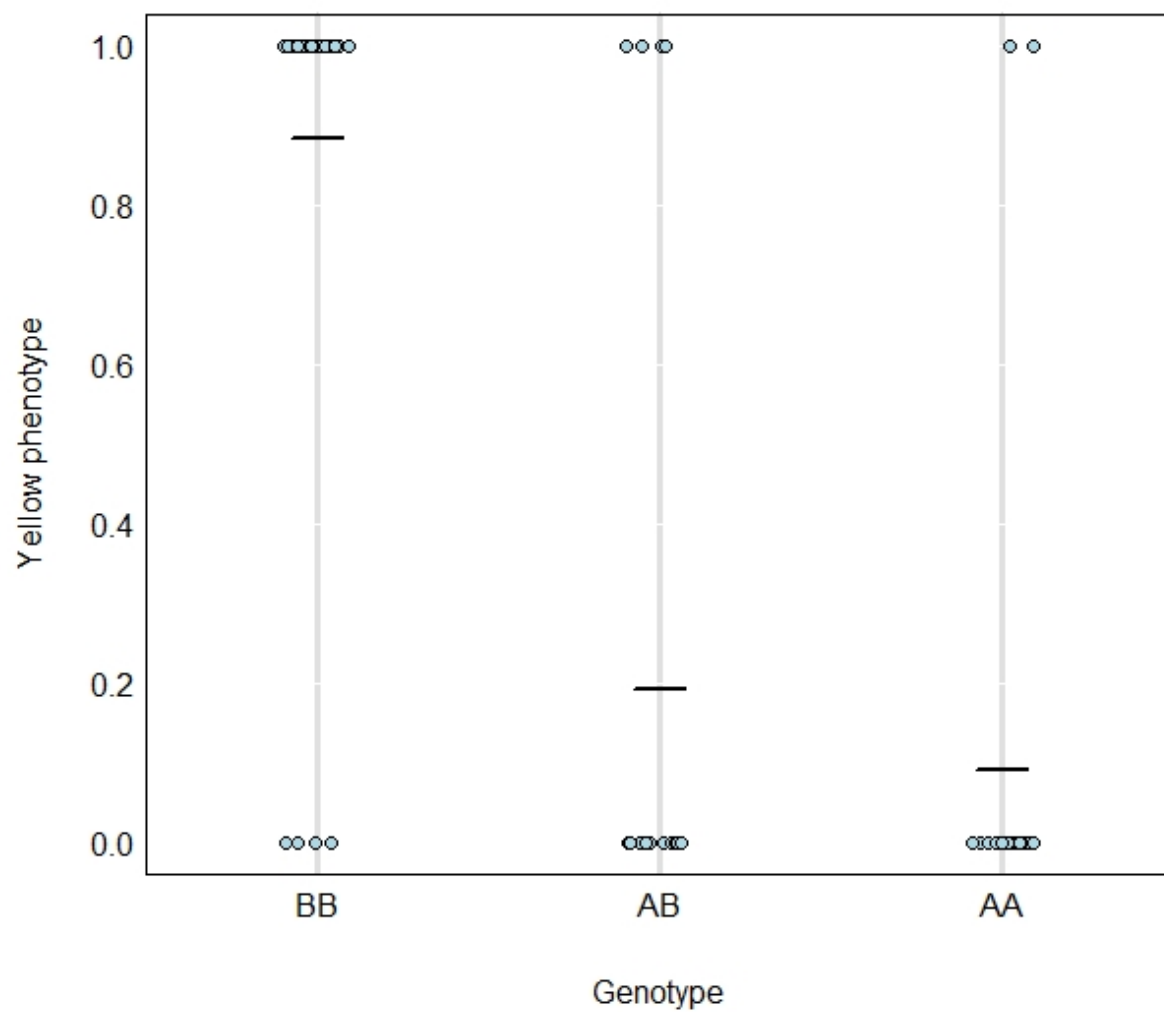

### Chr 11, Position 10.878 cM

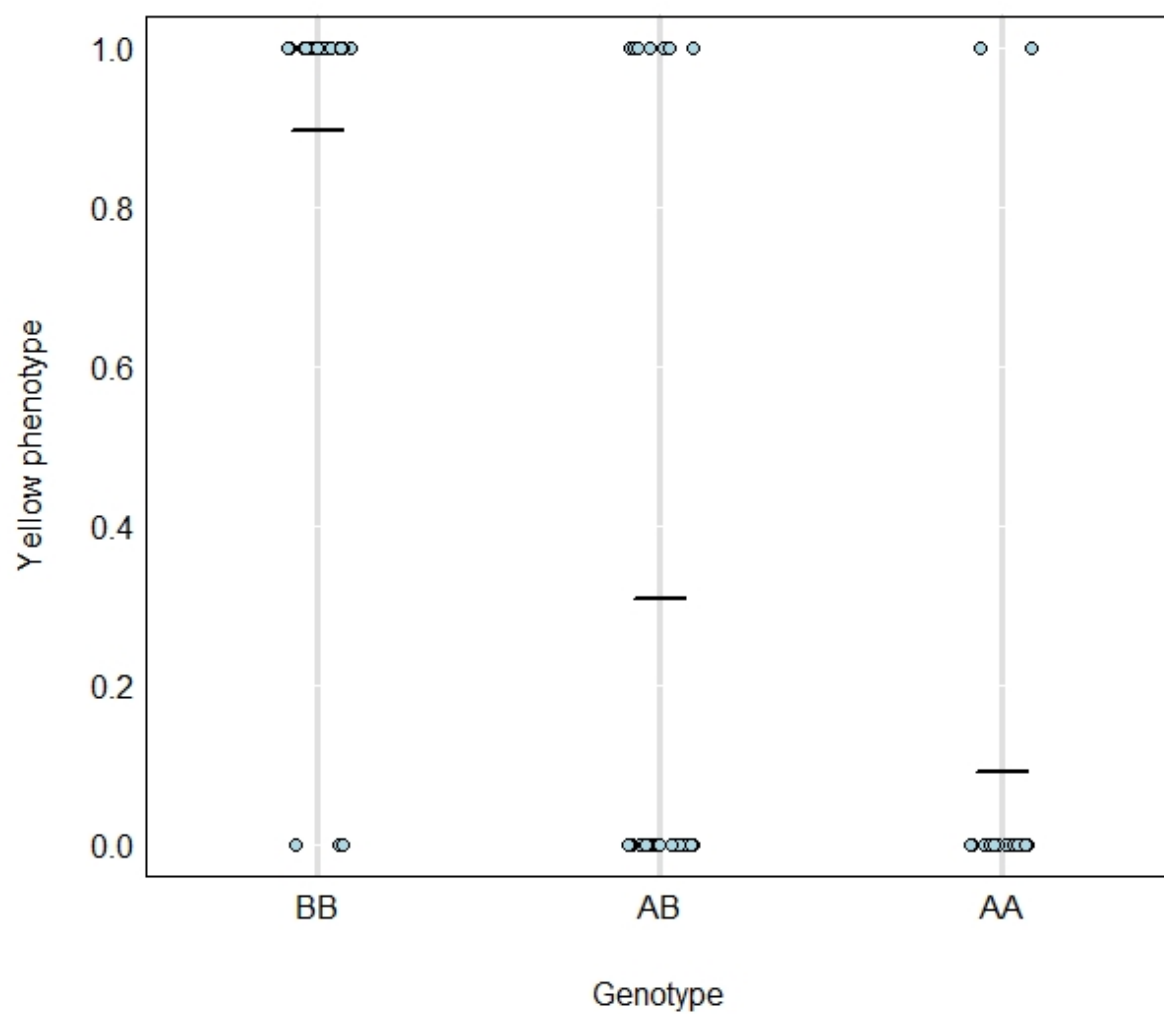

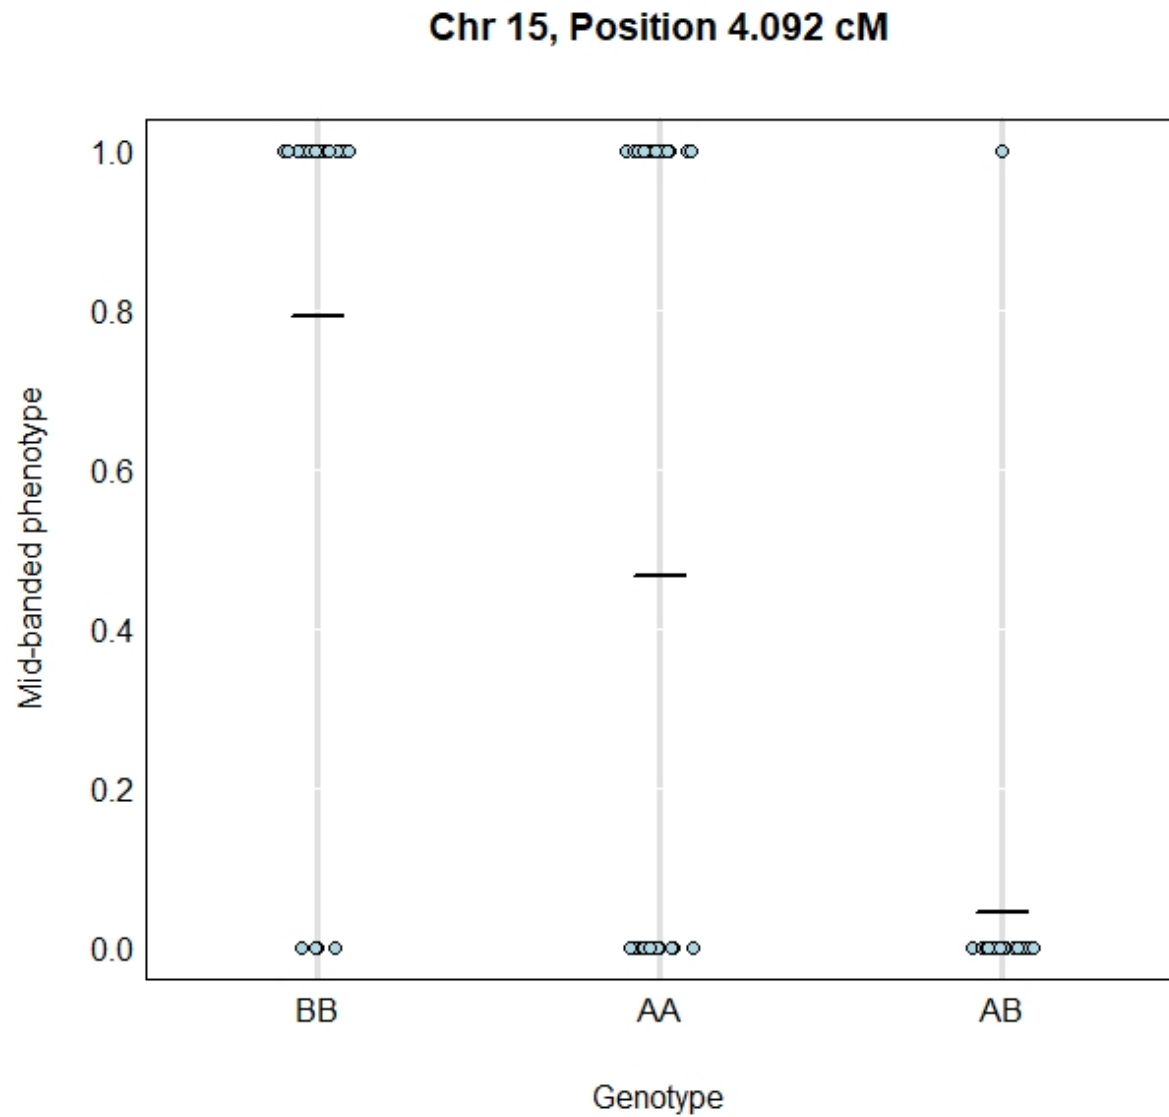

# Chr 15, Position 6.832 cM

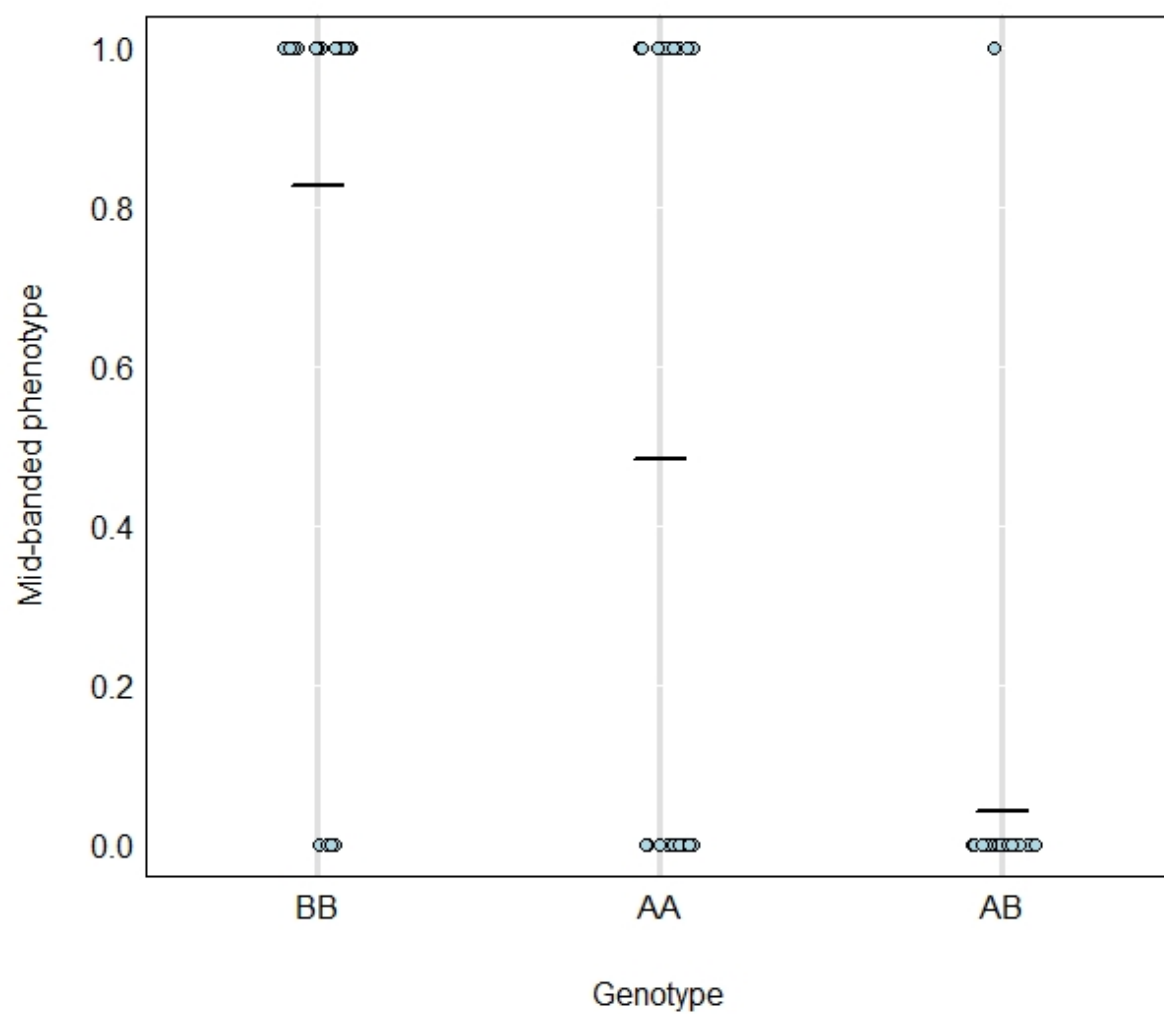



# Chr 15, Position 7.503 cM

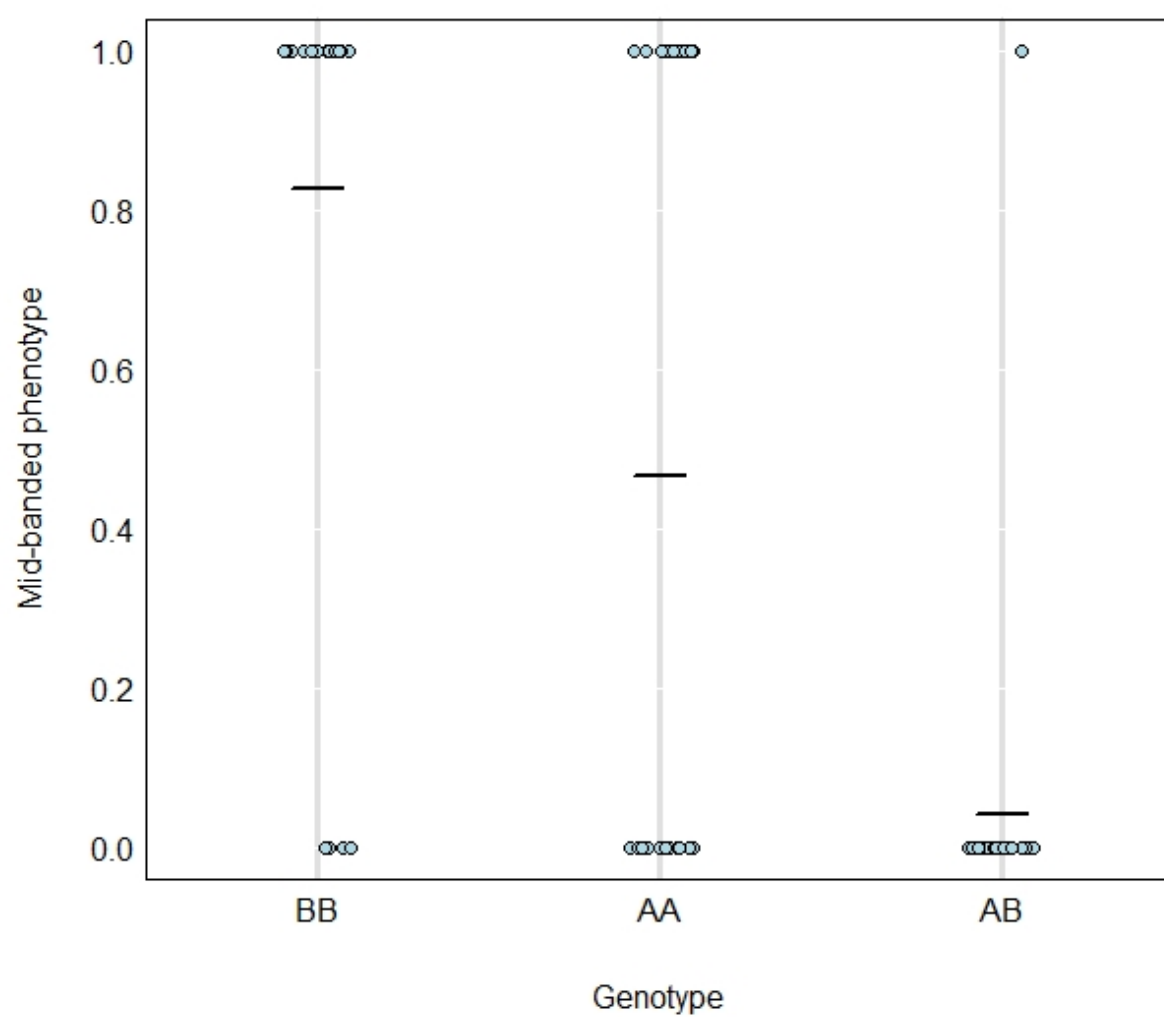

**Figure S5:** Raw genotypes for all individuals, at all SNPs at each putative locus within mid-banded interval M2 that do not fit the expected allele pattern.

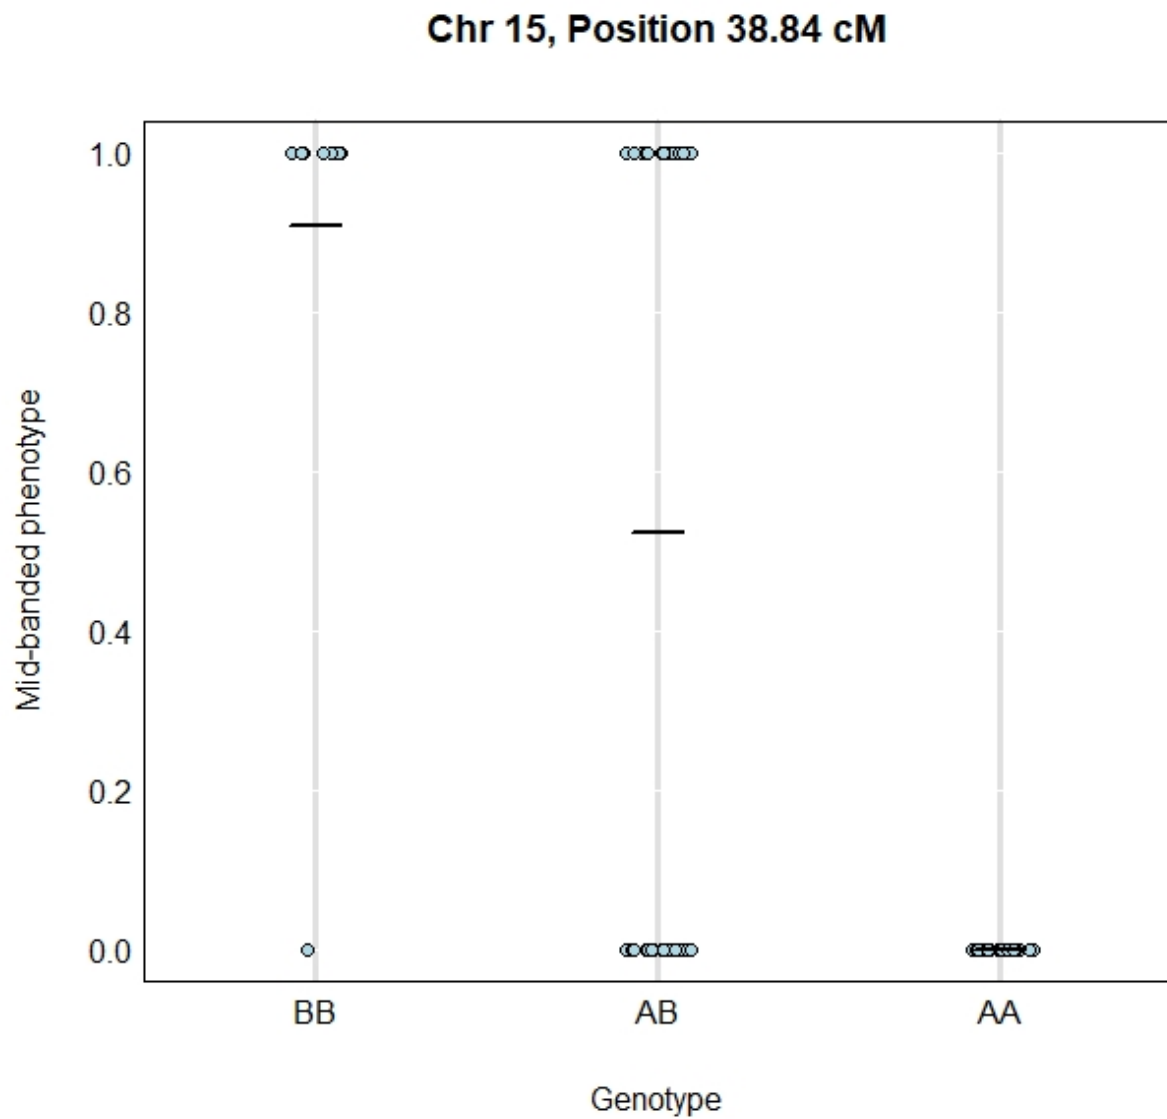

**Chr 15, Position 40.853 cM**

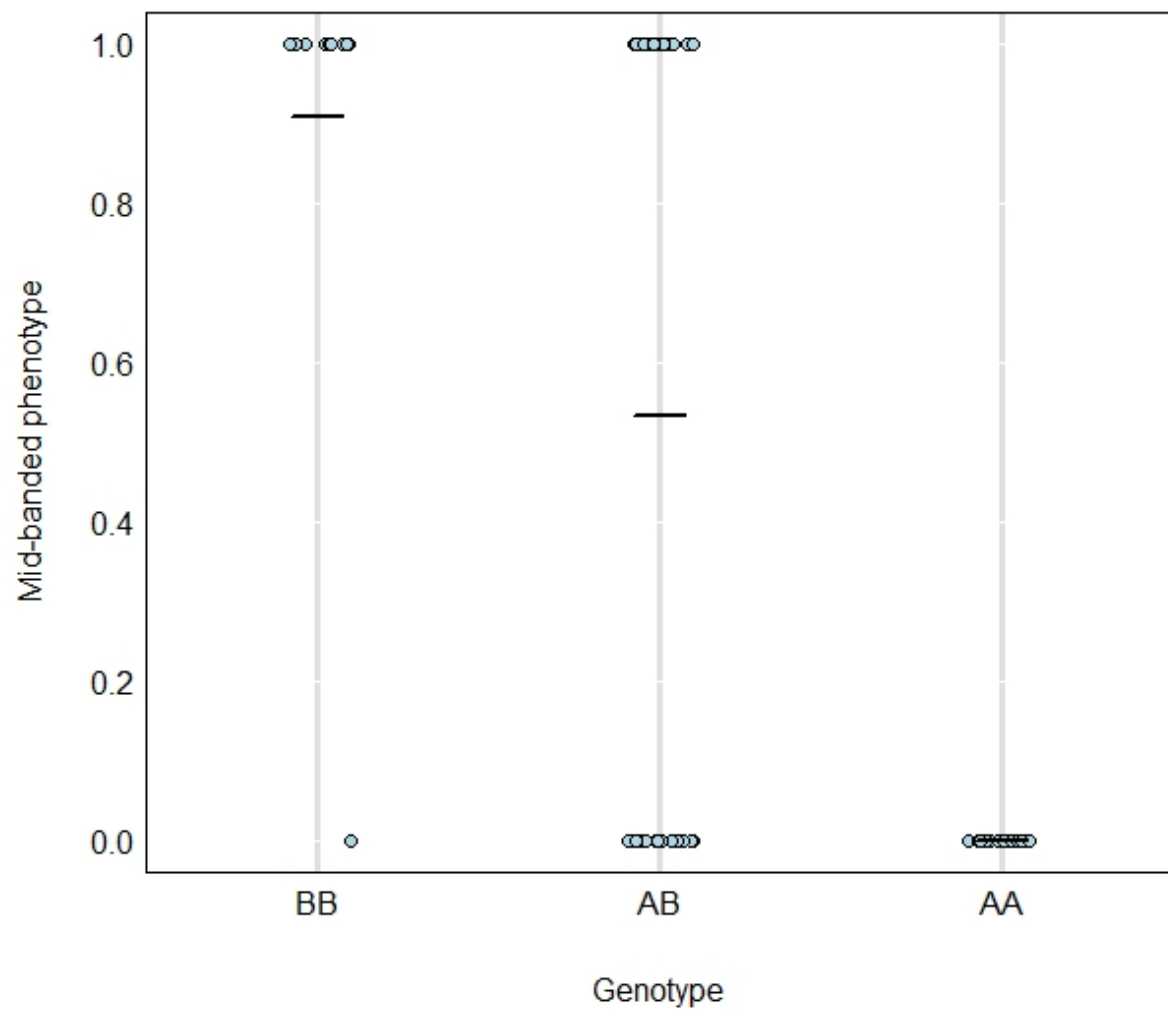

**Chr 15, Position 41.524 cM**

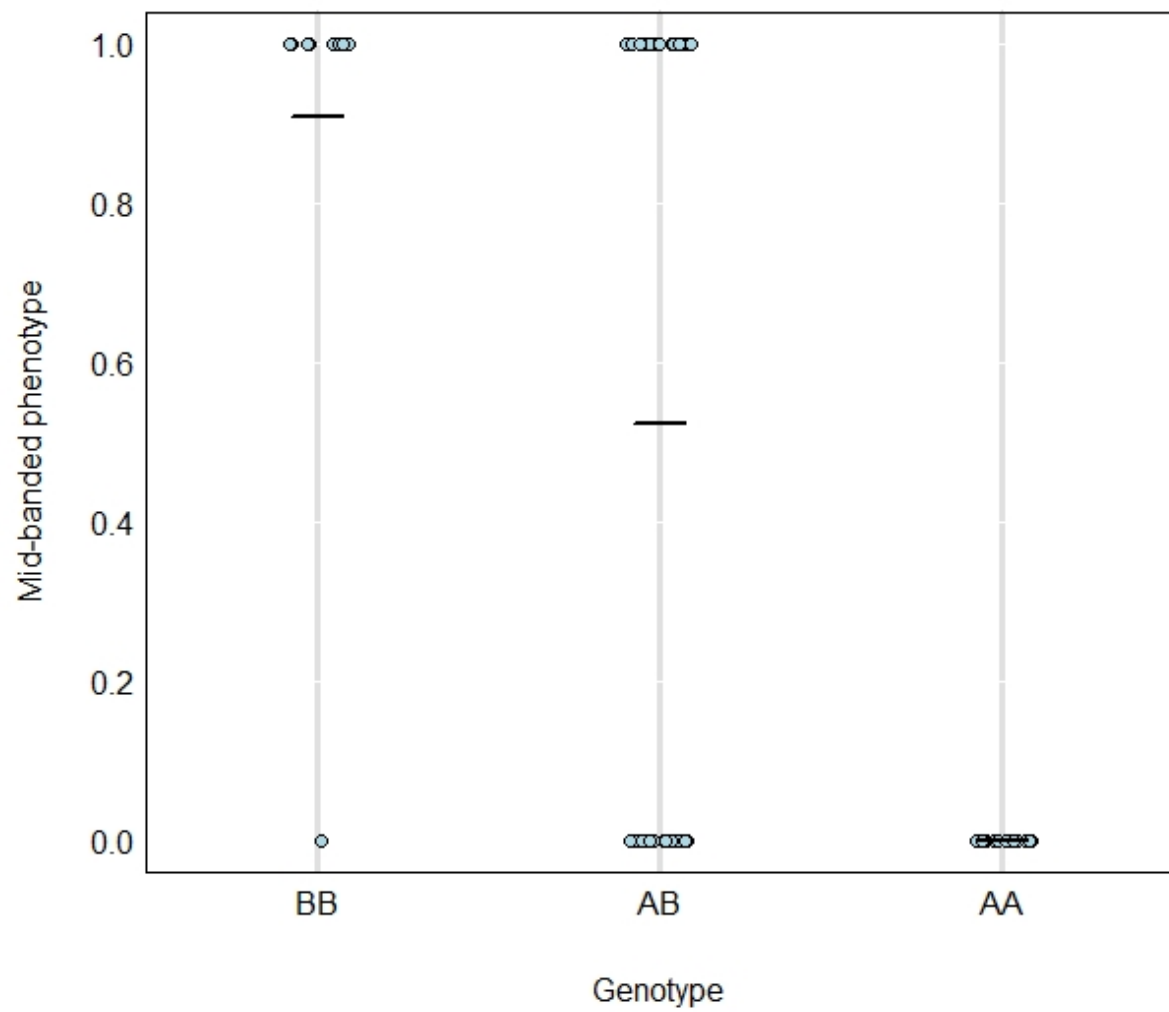

# Chr 15, Position 42.195 cM

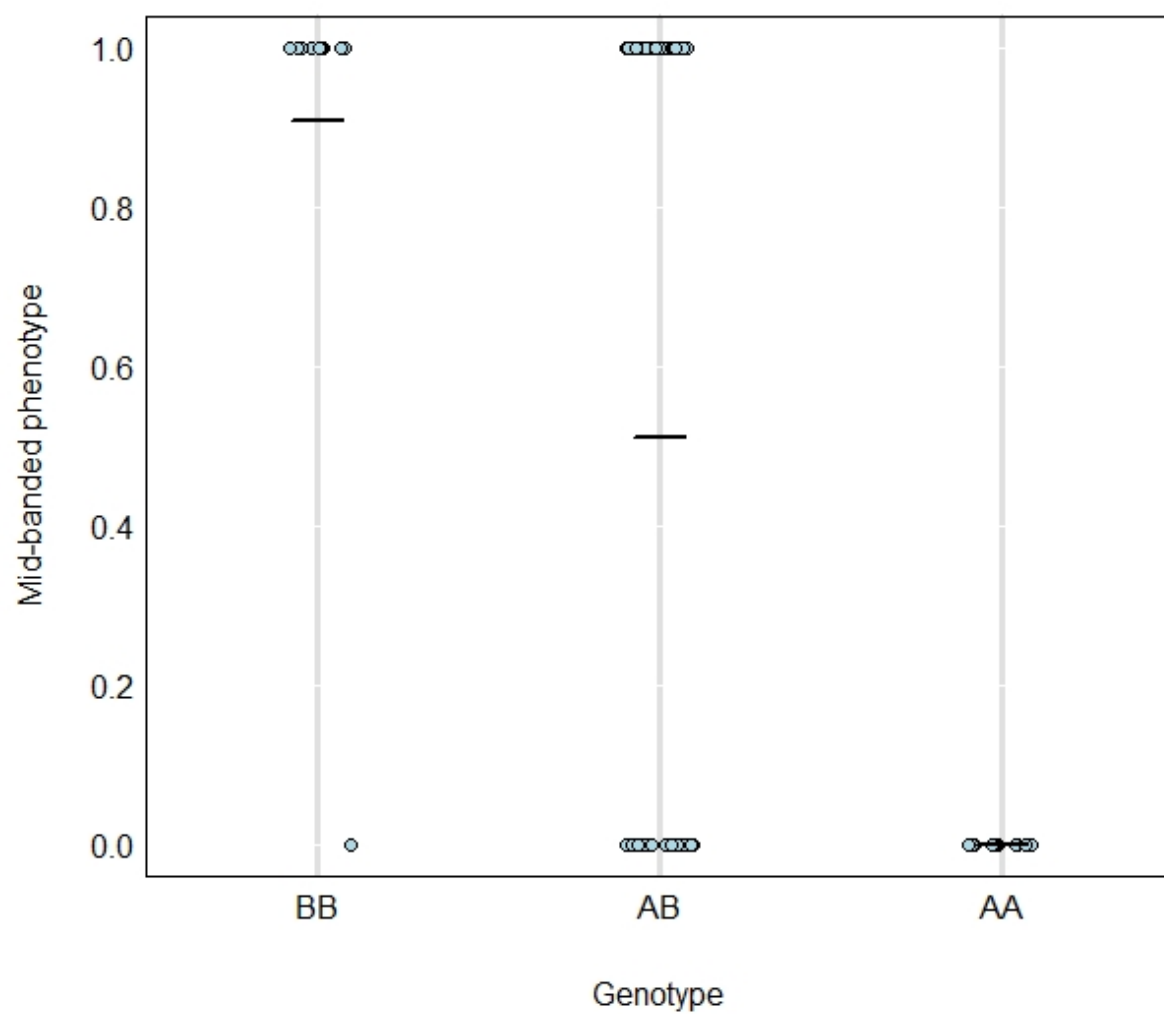

# Chr 15, Position 42.867 cM

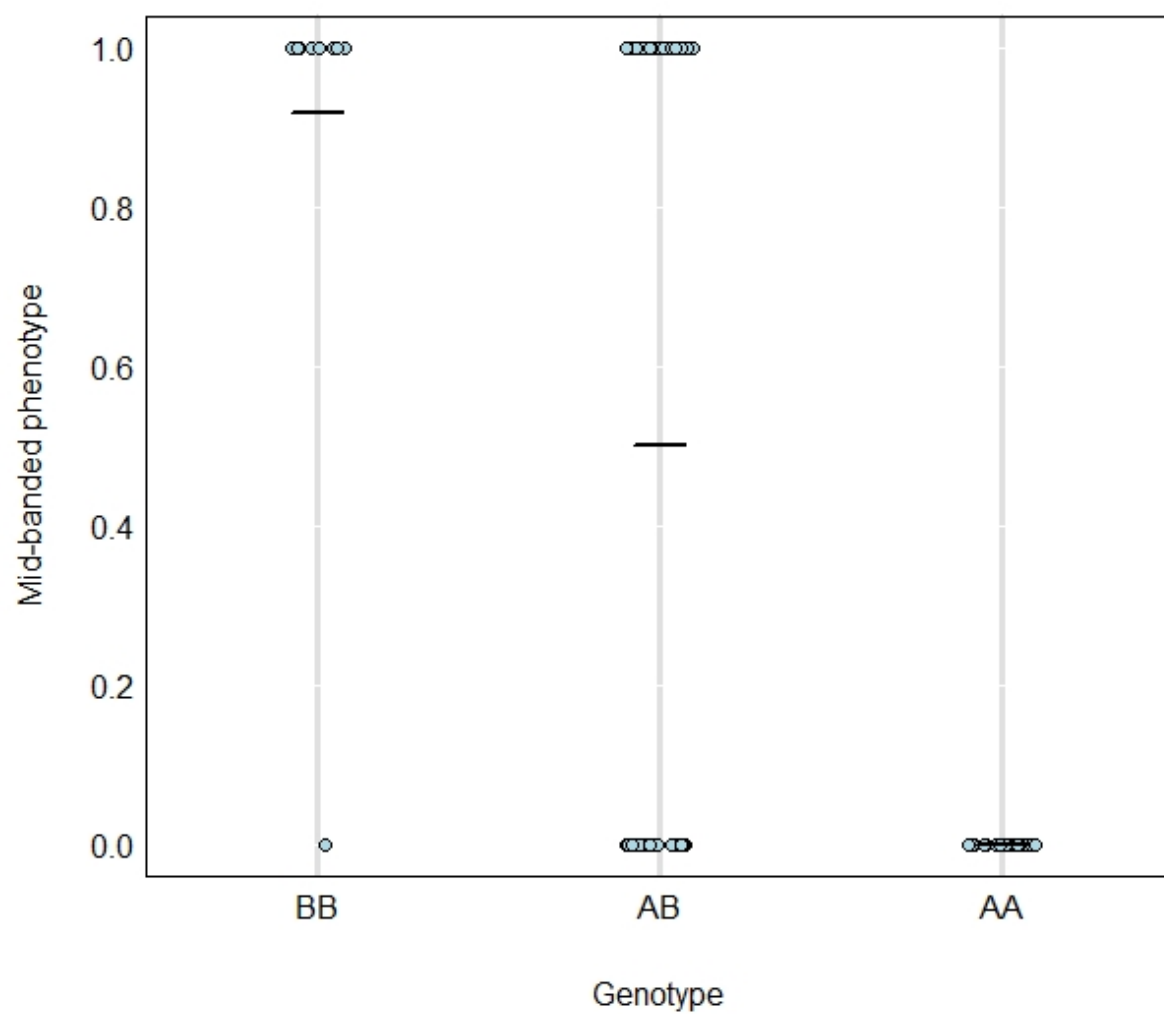

**Chr 15, Position 44.218 cM**

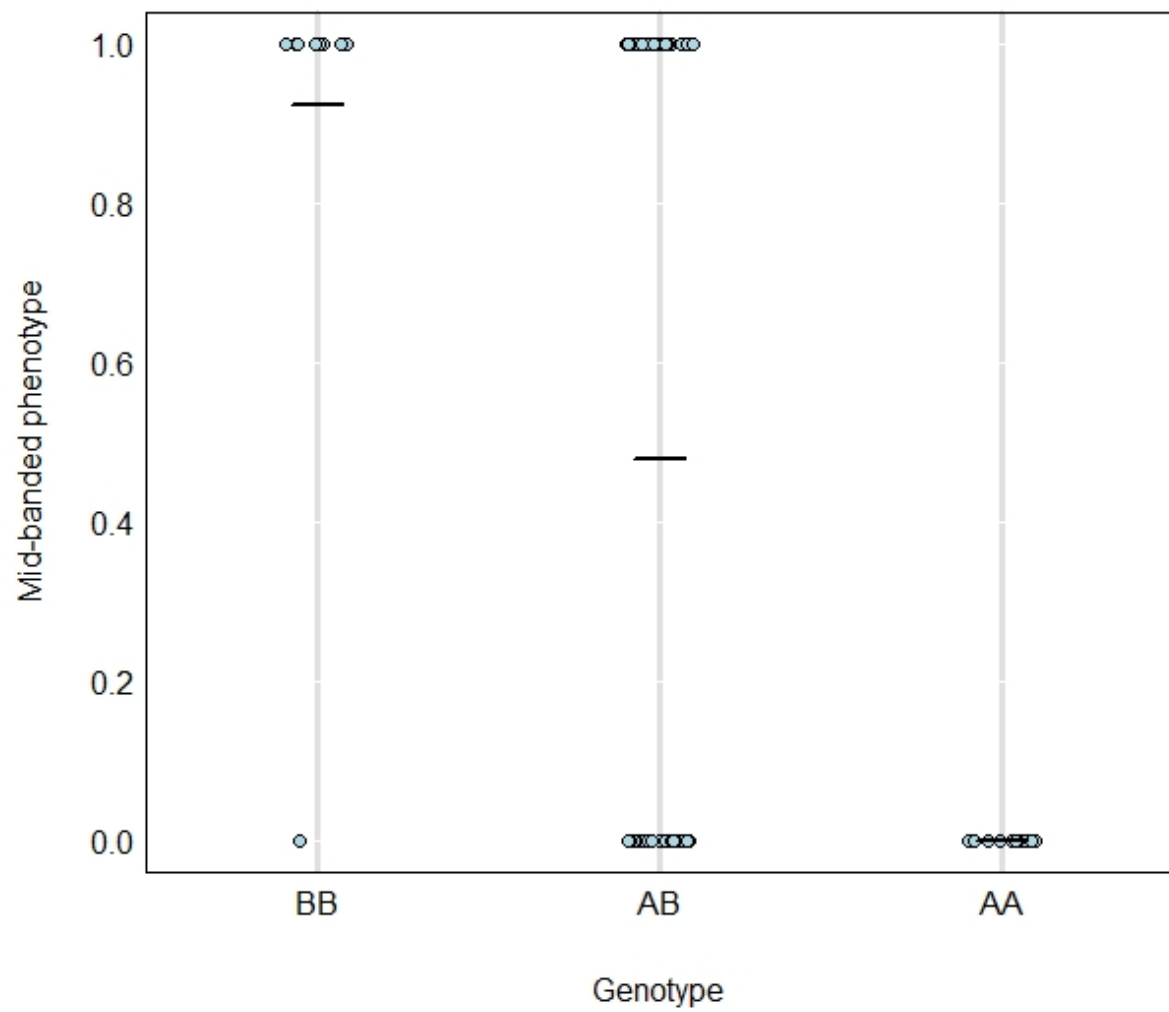

Supplement: Supplementary file [file 6c462ede0329340e41e71b83.pdf]
