# Supplementary material for: Fine mapping of the Cepaea nemoralis shell colour and mid-banded loci using a high-density linkage map
Source: Research Square preprint supplement (doi:10.21203/rs.3.rs-2760735/v1), 2023-04-28
Supplement: Supplementary file 1 [file 697110cf1d2c93d8b051b683.xlsx]

## Sheet: Refined_New_20_Cepaea_HetHom_AB
MARKER	Contig	ID	LG	MALE_POS	FEMALE_POS	C451	C452	C691	C692	C695	C698	C699	C700	C701	C702	C703	C704	C706	C707	C708	C709	C714	C715	C716	C724	C725	C726	C750	C751	C752	C753	C754	C755	C756	C757	C758	C769	C770	C771	C772	C773	C785	C786	C795	C796	C797	C804	C805	C806
1	ctg35418	ctg35418_8250	7	56.079	56.079	AB	AB	BB	AA	AB	AA	AA	AB	AB	AB	AB	BB	AA	AA	AA	BB	BB	AA	AB	AB	AA	BB	AA	AA	AB	AB	AA	AA	AB	AB	BB	AA	AA	AA	AB	BB	AA	AA	AB	AA	BB	AB	AB	AA
4	ctg22904	ctg22904_16193	2	37.29	37.29	AB	AB	AA	AB	BB	AB	AB	AB	AB	AB	BB	AB	AB	AA	AB	BB	AB	AB	AB	AB	BB	AB	AA	AB	AB	AB	BB	AA	AB	AB	AB	AA	BB	AA	AB	AB	AA	AB	AB	BB	BB	AA	AB	AA
5	ctg35412	ctg35412_20621	1	109.388	109.388	AB	AB	AA	BB	BB	AB	BB	AB	AB	AB	AB	AB	AB	BB	AB	AB	AB	AA	BB	AA	AB	AB	AB	BB	BB	BB	AB	AB	AB	BB	BB	AB	AA	AB	AB	AB	AB	AB	AA	AB	AB	AB	BB	AB
6	ctg35412	ctg35412_20657	1	109.388	109.388	AB	AB	AA	BB	BB	AB	BB	AB	AB	AB	AB	AB	AB	BB	AB	AB	AB	AA	BB	AA	AB	AB	AB	BB	BB	BB	AB	AB	AB	BB	BB	AB	AA	AB	AB	AB	AB	AB	AA	AB	AB	AB	BB	AB
7	ctg35412	ctg35412_20738	1	109.388	109.388	AB	AB	AA	BB	BB	AB	BB	AB	AB	AB	AB	AB	AB	BB	AB	AB	AB	AA	BB	AA	AB	AB	AB	BB	BB	BB	AB	AB	AB	BB	BB	AB	AA	AB	AB	AB	AB	AB	AA	AB	AB	AB	BB	AB
8	ctg35412	ctg35412_20836	1	109.388	109.388	AB	AB	AA	BB	BB	AB	BB	AB	AB	AB	AB	AB	AB	BB	AB	AB	AB	AA	BB	AA	AB	AB	AB	BB	BB	BB	AB	AB	AB	BB	BB	AB	AA	AB	AB	AB	AB	AB	AA	AB	AB	AB	BB	AB
9	ctg35412	ctg35412_20844	1	109.388	109.388	AB	AB	AA	BB	BB	AB	BB	AB	AB	AB	AB	AB	AB	BB	AB	AB	AB	AA	BB	AA	AB	AB	AB	BB	BB	BB	AB	AB	AB	BB	BB	AB	AA	AB	AB	AB	AB	AB	AA	AB	AB	AB	BB	AB
10	ctg35412	ctg35412_21096	1	108.716	108.716	AB	AB	AA	BB	BB	AB	BB	AB	AB	AB	AB	AB	AB	BB	AB	AB	AB	AA	BB	AA	AB	AB	AB	BB	BB	BB	AB	AB	AB	AB	BB	AB	AA	AB	AB	AB	AB	AB	AA	AB	AB	AB	BB	AB
11	ctg35412	ctg35412_21125	1	109.388	109.388	AB	AB	AA	BB	BB	AB	BB	AB	AB	AB	AB	AB	AB	BB	AB	AB	AB	AA	BB	AA	AB	AB	AB	BB	BB	BB	AB	AB	AB	BB	BB	AB	AA	AB	AB	AB	AB	AB	AA	AB	AB	AB	BB	AB
12	ctg35412	ctg35412_21138	1	109.388	109.388	AB	AB	AA	BB	BB	AB	BB	AB	AB	AB	AB	AB	AB	BB	AB	AB	AB	AA	BB	AA	AB	AB	AB	BB	BB	BB	AB	AB	AB	BB	BB	AB	AA	AB	AB	AB	AB	AB	AA	AB	AB	AB	BB	AB
13	ctg35412	ctg35412_21144	1	109.388	109.388	AB	AB	AA	BB	BB	AB	BB	AB	AB	AB	AB	AB	AB	BB	AB	AB	AB	AA	BB	AA	AB	AB	AB	BB	BB	BB	AB	AB	AB	BB	BB	AB	AA	AB	AB	AB	AB	AB	AA	AB	AB	AB	BB	AB
14	ctg35412	ctg35412_22462	1	109.388	109.388	AB	AB	AA	BB	BB	AB	BB	AB	AB	AB	AB	AB	AB	BB	AB	AB	AB	AA	BB	AA	AB	AB	AB	BB	BB	BB	AB	AB	AB	BB	BB	AB	AA	AB	AB	AB	AB	AB	AA	AB	AB	AB	BB	AB
15	ctg35412	ctg35412_24042	1	109.388	109.388	AB	AB	AA	BB	BB	AB	BB	AB	AB	AB	AB	AB	AB	BB	AB	AB	AB	AA	BB	AA	AB	AB	AB	BB	BB	BB	AB	AB	AB	BB	BB	AB	AA	AB	AB	AB	AB	AB	AA	AB	AB	AB	BB	AB
16	ctg35412	ctg35412_25050	1	108.716	108.716	AB	AB	AA	BB	BB	AB	BB	AB	AB	AB	AB	AB	AB	BB	AB	AB	AB	AA	BB	AA	AB	AB	AB	BB	BB	BB	AB	AB	AB	AB	BB	AB	AA	AB	AB	AB	AB	AB	AA	AB	AB	AB	BB	AB
32	ctg35412	ctg35412_28267	1	108.716	108.716	AB	AB	AA	BB	BB	AB	BB	AB	AB	AB	AB	AB	AB	BB	AB	AB	AB	AA	BB	AA	AB	AB	AB	BB	BB	BB	AB	AB	AB	AB	BB	AB	AA	AB	AB	AB	AB	AB	AA	AB	AB	AB	BB	AB
34	ctg35412	ctg35412_29231	1	108.716	108.716	AB	AB	AA	BB	BB	AB	BB	AB	AB	AB	AB	AB	AB	BB	AB	AB	AB	AA	BB	AA	AB	AB	AB	BB	BB	BB	AB	AB	AB	AB	BB	AB	AA	AB	AB	AB	AB	AB	AA	AB	AB	AB	BB	AB
35	ctg35412	ctg35412_29654	1	109.388	109.388	AB	AB	AA	BB	BB	AB	BB	AB	AB	AB	AB	AB	AB	BB	AB	AB	AB	AA	BB	AA	AB	AB	AB	BB	BB	BB	AB	AB	AB	BB	BB	AB	AA	AB	AB	AB	AB	AB	AA	AB	AB	AB	BB	AB
36	ctg35412	ctg35412_30962	1	108.716	108.716	AB	AB	AA	BB	BB	AB	BB	AB	AB	AB	AB	AB	AB	BB	AB	AB	AB	AA	BB	AA	AB	AB	AB	BB	BB	BB	AB	AB	AB	AB	BB	AB	AA	AB	AB	AB	AB	AB	AA	AB	AB	AB	BB	AB
37	ctg35412	ctg35412_31156	1	109.388	109.388	AB	AB	AA	BB	BB	AB	BB	AB	AB	AB	AB	AB	AB	BB	AB	AB	AB	AA	BB	AA	AB	AB	AB	BB	BB	BB	AB	AB	AB	BB	BB	AB	AA	AB	AB	AB	AB	AB	AA	AB	AB	AB	BB	AB
41	ctg35411	ctg35411_14794	9	11.502	11.502	AB	AB	AA	AB	AB	BB	BB	BB	BB	AB	AA	AB	AB	AB	BB	BB	AA	AB	AB	AB	AB	AB	AB	BB	BB	BB	AB	AB	AB	AB	AB	AB	BB	AA	BB	AA	AB	BB	AB	AB	BB	BB	BB	AB
126	ctg22017	ctg22017_21046	14	80.818	80.818	AB	AB	AA	AA	BB	AA	AB	BB	AB	AA	AB	AB	AA	AA	AB	AB	AB	BB	AA	AB	AB	AB	BB	AB	BB	AB	BB	AA	BB	AB	BB	BB	AB	AA	BB	BB	AB	AB	AA	AA	AA	BB	AB	AB
130	ctg22016	ctg22016_23828	1	71.123	71.123	AB	AB	AB	AB	AB	AB	BB	AB	BB	AB	AA	AB	BB	BB	AB	AA	AB	AB	BB	AB	AA	AB	AA	BB	BB	BB	AB	BB	AB	AB	AB	AB	AB	BB	BB	BB	AA	AB	BB	AB	BB	AB	BB	BB
131	ctg22016	ctg22016_26544	1	69.1	69.1	AB	AB	AB	AB	AB	AB	BB	AB	BB	AB	AA	AB	BB	BB	AB	AA	AB	AB	BB	AB	AA	AB	AA	BB	BB	BB	AB	BB	AB	AB	AB	AB	AB	BB	BB	AB	AA	AB	BB	AB	BB	AB	BB	BB
132	ctg22016	ctg22016_26589	1	71.123	71.123	AB	AB	AB	AB	AB	AB	BB	AB	BB	AB	AA	AB	BB	BB	AB	AA	AB	AB	BB	AB	AA	AB	AA	BB	BB	BB	AB	BB	AB	AB	AB	AB	AB	BB	BB	BB	AA	AB	BB	AB	BB	AB	BB	BB
133	ctg9291	ctg9291_78672	1	92.609	92.609	AB	AB	AA	AB	BB	AB	BB	AB	BB	AB	AB	AB	AB	BB	AB	AA	AB	AB	BB	AA	AB	AB	AA	BB	BB	BB	AB	AB	AB	AA	BB	AB	AB	AB	BB	BB	AB	AB	BB	AB	AB	AB	BB	AB
134	ctg9291	ctg9291_78684	1	92.609	92.609	AB	AB	AA	AB	BB	AB	BB	AB	BB	AB	AB	AB	AB	BB	AB	AA	AB	AB	BB	AA	AB	AB	AA	BB	BB	BB	AB	AB	AB	AA	BB	AB	AB	AB	BB	BB	AB	AB	BB	AB	AB	AB	BB	AB
135	ctg9291	ctg9291_78691	1	92.609	92.609	AB	AB	AA	AB	BB	AB	BB	AB	BB	AB	AB	AB	AB	BB	AB	AA	AB	AB	BB	AA	AB	AB	AA	BB	BB	BB	AB	AB	AB	AA	BB	AB	AB	AB	BB	BB	AB	AB	BB	AB	AB	AB	BB	AB
136	ctg9291	ctg9291_80859	1	92.609	92.609	AB	AB	AA	AB	BB	AB	BB	AB	BB	AB	AB	AB	AB	BB	AB	AA	AB	AB	BB	AA	AB	AB	AA	BB	BB	BB	AB	AB	AB	AA	BB	AB	AB	AB	BB	BB	AB	AB	BB	AB	AB	AB	BB	AB
137	ctg9291	ctg9291_85341	1	92.609	92.609	AB	AB	AA	AB	BB	AB	BB	AB	BB	AB	AB	AB	AB	BB	AB	AA	AB	AB	BB	AA	AB	AB	AA	BB	BB	BB	AB	AB	AB	AA	BB	AB	AB	AB	BB	BB	AB	AB	BB	AB	AB	AB	BB	AB
138	ctg9291	ctg9291_85529	1	92.609	92.609	AB	AB	AA	AB	BB	AB	BB	AB	BB	AB	AB	AB	AB	BB	AB	AA	AB	AB	BB	AA	AB	AB	AA	BB	BB	BB	AB	AB	AB	AA	BB	AB	AB	AB	BB	BB	AB	AB	BB	AB	AB	AB	BB	AB
139	ctg9291	ctg9291_85533	1	92.609	92.609	AB	AB	AA	AB	BB	AB	BB	AB	BB	AB	AB	AB	AB	BB	AB	AA	AB	AB	BB	AA	AB	AB	AA	BB	BB	BB	AB	AB	AB	AA	BB	AB	AB	AB	BB	BB	AB	AB	BB	AB	AB	AB	BB	AB
140	ctg9291	ctg9291_85549	1	92.609	92.609	AB	AB	AA	AB	BB	AB	BB	AB	BB	AB	AB	AB	AB	BB	AB	AA	AB	AB	BB	AA	AB	AB	AA	BB	BB	BB	AB	AB	AB	AA	BB	AB	AB	AB	BB	BB	AB	AB	BB	AB	AB	AB	BB	AB
141	ctg9291	ctg9291_85577	1	92.609	92.609	AB	AB	AA	AB	BB	AB	BB	AB	BB	AB	AB	AB	AB	BB	AB	AA	AB	AB	BB	AA	AB	AB	AA	BB	BB	BB	AB	AB	AB	AA	BB	AB	AB	AB	BB	BB	AB	AB	BB	AB	AB	AB	BB	AB
142	ctg9291	ctg9291_85582	1	92.609	92.609	AB	AB	AA	AB	BB	AB	BB	AB	BB	AB	AB	AB	AB	BB	AB	AA	AB	AB	BB	AA	AB	AB	AA	BB	BB	BB	AB	AB	AB	AA	BB	AB	AB	AB	BB	BB	AB	AB	BB	AB	AB	AB	BB	AB
143	ctg9291	ctg9291_89535	1	92.609	92.609	AB	AB	AA	AB	BB	AB	BB	AB	BB	AB	AB	AB	AB	BB	AB	AA	AB	AB	BB	AA	AB	AB	AA	BB	BB	BB	AB	AB	AB	AA	BB	AB	AB	AB	BB	BB	AB	AB	BB	AB	AB	AB	BB	AB
144	ctg9291	ctg9291_89547	1	92.609	92.609	AB	AB	AA	AB	BB	AB	BB	AB	BB	AB	AB	AB	AB	BB	AB	AA	AB	AB	BB	AA	AB	AB	AA	BB	BB	BB	AB	AB	AB	AA	BB	AB	AB	AB	BB	BB	AB	AB	BB	AB	AB	AB	BB	AB
145	ctg9291	ctg9291_89682	1	92.609	92.609	AB	AB	AA	AB	BB	AB	BB	AB	BB	AB	AB	AB	AB	BB	AB	AA	AB	AB	BB	AA	AB	AB	AA	BB	BB	BB	AB	AB	AB	AA	BB	AB	AB	AB	BB	BB	AB	AB	BB	AB	AB	AB	BB	AB
146	ctg9291	ctg9291_95249	1	92.609	92.609	AB	AB	AA	AB	BB	AB	BB	AB	BB	AB	AB	AB	AB	BB	AB	AA	AB	AB	BB	AA	AB	AB	AA	BB	BB	BB	AB	AB	AB	AA	BB	AB	AB	AB	BB	BB	AB	AB	BB	AB	AB	AB	BB	AB
147	ctg9291	ctg9291_95284	1	92.609	92.609	AB	AB	AA	AB	BB	AB	BB	AB	BB	AB	AB	AB	AB	BB	AB	AA	AB	AB	BB	AA	AB	AB	AA	BB	BB	BB	AB	AB	AB	AA	BB	AB	AB	AB	BB	BB	AB	AB	BB	AB	AB	AB	BB	AB
148	ctg9291	ctg9291_95504	1	92.609	92.609	AB	AB	AA	AB	BB	AB	BB	AB	BB	AB	AB	AB	AB	BB	AB	AA	AB	AB	BB	AA	AB	AB	AA	BB	BB	BB	AB	AB	AB	AA	BB	AB	AB	AB	BB	BB	AB	AB	BB	AB	AB	AB	BB	AB
149	ctg9291	ctg9291_95507	1	92.609	92.609	AB	AB	AA	AB	BB	AB	BB	AB	BB	AB	AB	AB	AB	BB	AB	AA	AB	AB	BB	AA	AB	AB	AA	BB	BB	BB	AB	AB	AB	AA	BB	AB	AB	AB	BB	BB	AB	AB	BB	AB	AB	AB	BB	AB
150	ctg9291	ctg9291_95528	1	92.609	92.609	AB	AB	AA	AB	BB	AB	BB	AB	BB	AB	AB	AB	AB	BB	AB	AA	AB	AB	BB	AA	AB	AB	AA	BB	BB	BB	AB	AB	AB	AA	BB	AB	AB	AB	BB	BB	AB	AB	BB	AB	AB	AB	BB	AB
151	ctg9291	ctg9291_96044	1	92.609	92.609	AB	AB	AA	AB	BB	AB	BB	AB	BB	AB	AB	AB	AB	BB	AB	AA	AB	AB	BB	AA	AB	AB	AA	BB	BB	BB	AB	AB	AB	AA	BB	AB	AB	AB	BB	BB	AB	AB	BB	AB	AB	AB	BB	AB
152	ctg9291	ctg9291_96057	1	92.609	92.609	AB	AB	AA	AB	BB	AB	BB	AB	BB	AB	AB	AB	AB	BB	AB	AA	AB	AB	BB	AA	AB	AB	AA	BB	BB	BB	AB	AB	AB	AA	BB	AB	AB	AB	BB	BB	AB	AB	BB	AB	AB	AB	BB	AB
153	ctg9291	ctg9291_96157	1	92.609	92.609	AB	AB	AA	AB	BB	AB	BB	AB	BB	AB	AB	AB	AB	BB	AB	AA	AB	AB	BB	AA	AB	AB	AA	BB	BB	BB	AB	AB	AB	AA	BB	AB	AB	AB	BB	BB	AB	AB	BB	AB	AB	AB	BB	AB
154	ctg9291	ctg9291_96166	1	92.609	92.609	AB	AB	AA	AB	BB	AB	BB	AB	BB	AB	AB	AB	AB	BB	AB	AA	AB	AB	BB	AA	AB	AB	AA	BB	BB	BB	AB	AB	AB	AA	BB	AB	AB	AB	BB	BB	AB	AB	BB	AB	AB	AB	BB	AB
155	ctg9291	ctg9291_96306	1	92.609	92.609	AB	AB	AA	AB	BB	AB	BB	AB	BB	AB	AB	AB	AB	BB	AB	AA	AB	AB	BB	AA	AB	AB	AA	BB	BB	BB	AB	AB	AB	AA	BB	AB	AB	AB	BB	BB	AB	AB	BB	AB	AB	AB	BB	AB
156	ctg9291	ctg9291_96450	1	92.609	92.609	AB	AB	AA	AB	BB	AB	BB	AB	BB	AB	AB	AB	AB	BB	AB	AA	AB	AB	BB	AA	AB	AB	AA	BB	BB	BB	AB	AB	AB	AA	BB	AB	AB	AB	BB	BB	AB	AB	BB	AB	AB	AB	BB	AB
157	ctg9291	ctg9291_96586	1	92.609	92.609	AB	AB	AA	AB	BB	AB	BB	AB	BB	AB	AB	AB	AB	BB	AB	AA	AB	AB	BB	AA	AB	AB	AA	BB	BB	BB	AB	AB	AB	AA	BB	AB	AB	AB	BB	BB	AB	AB	BB	AB	AB	AB	BB	AB
158	ctg9291	ctg9291_96599	1	92.609	92.609	AB	AB	AA	AB	BB	AB	BB	AB	BB	AB	AB	AB	AB	BB	AB	AA	AB	AB	BB	AA	AB	AB	AA	BB	BB	BB	AB	AB	AB	AA	BB	AB	AB	AB	BB	BB	AB	AB	BB	AB	AB	AB	BB	AB
159	ctg9291	ctg9291_96601	1	92.609	92.609	AB	AB	AA	AB	BB	AB	BB	AB	BB	AB	AB	AB	AB	BB	AB	AA	AB	AB	BB	AA	AB	AB	AA	BB	BB	BB	AB	AB	AB	AA	BB	AB	AB	AB	BB	BB	AB	AB	BB	AB	AB	AB	BB	AB
160	ctg9291	ctg9291_96664	1	92.609	92.609	AB	AB	AA	AB	BB	AB	BB	AB	BB	AB	AB	AB	AB	BB	AB	AA	AB	AB	BB	AA	AB	AB	AA	BB	BB	BB	AB	AB	AB	AA	BB	AB	AB	AB	BB	BB	AB	AB	BB	AB	AB	AB	BB	AB
161	ctg9291	ctg9291_96749	1	92.609	92.609	AB	AB	AA	AB	BB	AB	BB	AB	BB	AB	AB	AB	AB	BB	AB	AA	AB	AB	BB	AA	AB	AB	AA	BB	BB	BB	AB	AB	AB	AA	BB	AB	AB	AB	BB	BB	AB	AB	BB	AB	AB	AB	BB	AB
162	ctg9291	ctg9291_96772	1	92.609	92.609	AB	AB	AA	AB	BB	AB	BB	AB	BB	AB	AB	AB	AB	BB	AB	AA	AB	AB	BB	AA	AB	AB	AA	BB	BB	BB	AB	AB	AB	AA	BB	AB	AB	AB	BB	BB	AB	AB	BB	AB	AB	AB	BB	AB
163	ctg9291	ctg9291_96817	1	92.609	92.609	AB	AB	AA	AB	BB	AB	BB	AB	BB	AB	AB	AB	AB	BB	AB	AA	AB	AB	BB	AA	AB	AB	AA	BB	BB	BB	AB	AB	AB	AA	BB	AB	AB	AB	BB	BB	AB	AB	BB	AB	AB	AB	BB	AB
164	ctg9291	ctg9291_96824	1	92.609	92.609	AB	AB	AA	AB	BB	AB	BB	AB	BB	AB	AB	AB	AB	BB	AB	AA	AB	AB	BB	AA	AB	AB	AA	BB	BB	BB	AB	AB	AB	AA	BB	AB	AB	AB	BB	BB	AB	AB	BB	AB	AB	AB	BB	AB
165	ctg9291	ctg9291_101014	1	92.609	92.609	AB	AB	AA	AB	BB	AB	BB	AB	BB	AB	AB	AB	AB	BB	AB	AA	AB	AB	BB	AA	AB	AB	AA	BB	BB	BB	AB	AB	AB	AA	BB	AB	AB	AB	BB	BB	AB	AB	BB	AB	AB	AB	BB	AB
166	ctg9291	ctg9291_101026	1	92.609	92.609	AB	AB	AA	AB	BB	AB	BB	AB	BB	AB	AB	AB	AB	BB	AB	AA	AB	AB	BB	AA	AB	AB	AA	BB	BB	BB	AB	AB	AB	AA	BB	AB	AB	AB	BB	BB	AB	AB	BB	AB	AB	AB	BB	AB
167	ctg9291	ctg9291_101046	1	92.609	92.609	AB	AB	AA	AB	BB	AB	BB	AB	BB	AB	AB	AB	AB	BB	AB	AA	AB	AB	BB	AA	AB	AB	AA	BB	BB	BB	AB	AB	AB	AA	BB	AB	AB	AB	BB	BB	AB	AB	BB	AB	AB	AB	BB	AB
168	ctg9291	ctg9291_101056	1	92.609	92.609	AB	AB	AA	AB	BB	AB	BB	AB	BB	AB	AB	AB	AB	BB	AB	AA	AB	AB	BB	AA	AB	AB	AA	BB	BB	BB	AB	AB	AB	AA	BB	AB	AB	AB	BB	BB	AB	AB	BB	AB	AB	AB	BB	AB
169	ctg9291	ctg9291_101112	1	92.609	92.609	AB	AB	AA	AB	BB	AB	BB	AB	BB	AB	AB	AB	AB	BB	AB	AA	AB	AB	BB	AA	AB	AB	AA	BB	BB	BB	AB	AB	AB	AA	BB	AB	AB	AB	BB	BB	AB	AB	BB	AB	AB	AB	BB	AB
170	ctg9291	ctg9291_101130	1	92.609	92.609	AB	AB	AA	AB	BB	AB	BB	AB	BB	AB	AB	AB	AB	BB	AB	AA	AB	AB	BB	AA	AB	AB	AA	BB	BB	BB	AB	AB	AB	AA	BB	AB	AB	AB	BB	BB	AB	AB	BB	AB	AB	AB	BB	AB
171	ctg9291	ctg9291_101142	1	92.609	92.609	AB	AB	AA	AB	BB	AB	BB	AB	BB	AB	AB	AB	AB	BB	AB	AA	AB	AB	BB	AA	AB	AB	AA	BB	BB	BB	AB	AB	AB	AA	BB	AB	AB	AB	BB	BB	AB	AB	BB	AB	AB	AB	BB	AB
172	ctg9291	ctg9291_101169	1	92.609	92.609	AB	AB	AA	AB	BB	AB	BB	AB	BB	AB	AB	AB	AB	BB	AB	AA	AB	AB	BB	AA	AB	AB	AA	BB	BB	BB	AB	AB	AB	AA	BB	AB	AB	AB	BB	BB	AB	AB	BB	AB	AB	AB	BB	AB
173	ctg9291	ctg9291_101190	1	92.609	92.609	AB	AB	AA	AB	BB	AB	BB	AB	BB	AB	AB	AB	AB	BB	AB	AA	AB	AB	BB	AA	AB	AB	AA	BB	BB	BB	AB	AB	AB	AA	BB	AB	AB	AB	BB	BB	AB	AB	BB	AB	AB	AB	BB	AB
174	ctg9291	ctg9291_101262	1	92.609	92.609	AB	AB	AA	AB	BB	AB	BB	AB	BB	AB	AB	AB	AB	BB	AB	AA	AB	AB	BB	AA	AB	AB	AA	BB	BB	BB	AB	AB	AB	AA	BB	AB	AB	AB	BB	BB	AB	AB	BB	AB	AB	AB	BB	AB
175	ctg9291	ctg9291_112310	1	92.609	92.609	AB	AB	AA	AB	BB	AB	BB	AB	BB	AB	AB	AB	AB	BB	AB	AA	AB	AB	BB	AA	AB	AB	AA	BB	BB	BB	AB	AB	AB	AA	BB	AB	AB	AB	BB	BB	AB	AB	BB	AB	AB	AB	BB	AB
176	ctg9291	ctg9291_113048	1	92.609	92.609	AB	AB	AA	AB	BB	AB	BB	AB	BB	AB	AB	AB	AB	BB	AB	AA	AB	AB	BB	AA	AB	AB	AA	BB	BB	BB	AB	AB	AB	AA	BB	AB	AB	AB	BB	BB	AB	AB	BB	AB	AB	AB	BB	AB
177	ctg9291	ctg9291_113522	1	92.609	92.609	AB	AB	AA	AB	BB	AB	BB	AB	BB	AB	AB	AB	AB	BB	AB	AA	AB	AB	BB	AA	AB	AB	AA	BB	BB	BB	AB	AB	AB	AA	BB	AB	AB	AB	BB	BB	AB	AB	BB	AB	AB	AB	BB	AB
178	ctg9291	ctg9291_113524	1	92.609	92.609	AB	AB	AA	AB	BB	AB	BB	AB	BB	AB	AB	AB	AB	BB	AB	AA	AB	AB	BB	AA	AB	AB	AA	BB	BB	BB	AB	AB	AB	AA	BB	AB	AB	AB	BB	BB	AB	AB	BB	AB	AB	AB	BB	AB
179	ctg9291	ctg9291_113562	1	92.609	92.609	AB	AB	AA	AB	BB	AB	BB	AB	BB	AB	AB	AB	AB	BB	AB	AA	AB	AB	BB	AA	AB	AB	AA	BB	BB	BB	AB	AB	AB	AA	BB	AB	AB	AB	BB	BB	AB	AB	BB	AB	AB	AB	BB	AB
180	ctg9291	ctg9291_113586	1	92.609	92.609	AB	AB	AA	AB	BB	AB	BB	AB	BB	AB	AB	AB	AB	BB	AB	AA	AB	AB	BB	AA	AB	AB	AA	BB	BB	BB	AB	AB	AB	AA	BB	AB	AB	AB	BB	BB	AB	AB	BB	AB	AB	AB	BB	AB
181	ctg9291	ctg9291_114729	1	92.609	92.609	AB	AB	AA	AB	BB	AB	BB	AB	BB	AB	AB	AB	AB	BB	AB	AA	AB	AB	BB	AA	AB	AB	AA	BB	BB	BB	AB	AB	AB	AA	BB	AB	AB	AB	BB	BB	AB	AB	BB	AB	AB	AB	BB	AB
182	ctg9291	ctg9291_114976	1	92.609	92.609	AB	AB	AA	AB	BB	AB	BB	AB	BB	AB	AB	AB	AB	BB	AB	AA	AB	AB	BB	AA	AB	AB	AA	BB	BB	BB	AB	AB	AB	AA	BB	AB	AB	AB	BB	BB	AB	AB	BB	AB	AB	AB	BB	AB
183	ctg9291	ctg9291_117135	1	92.609	92.609	AB	AB	AA	AB	BB	AB	BB	AB	BB	AB	AB	AB	AB	BB	AB	AA	AB	AB	BB	AA	AB	AB	AA	BB	BB	BB	AB	AB	AB	AA	BB	AB	AB	AB	BB	BB	AB	AB	BB	AB	AB	AB	BB	AB
184	ctg9291	ctg9291_117136	1	92.609	92.609	AB	AB	AA	AB	BB	AB	BB	AB	BB	AB	AB	AB	AB	BB	AB	AA	AB	AB	BB	AA	AB	AB	AA	BB	BB	BB	AB	AB	AB	AA	BB	AB	AB	AB	BB	BB	AB	AB	BB	AB	AB	AB	BB	AB
185	ctg9290	ctg9290_2764	19	57.756	57.756	AB	AB	AB	AB	AB	AB	AB	AB	AA	AA	AB	AA	AB	BB	BB	AB	AB	AB	AB	AA	AB	AA	BB	AA	BB	AB	BB	AB	AB	AB	AA	AB	AA	BB	AB	AB	AB	AA	AA	BB	BB	BB	AA	AA
186	ctg9290	ctg9290_10236	19	52.386	52.386	AB	AB	AB	AB	AB	AB	AB	AB	AA	AA	AB	AA	AB	BB	BB	AB	AB	AB	AB	AA	AB	AA	BB	AA	BB	AB	BB	AB	AB	AB	AA	AA	AA	BB	AB	AB	AB	AA	AA	BB	BB	BB	AA	AA
187	ctg9290	ctg9290_10266	19	52.386	52.386	AB	AB	AB	AB	AB	AB	AB	AB	AA	AA	AB	AA	AB	BB	BB	AB	AB	AB	AB	AA	AB	AA	BB	AA	BB	AB	BB	AB	AB	AB	AA	AA	AA	BB	AB	AB	AB	AA	AA	BB	BB	BB	AA	AA
188	ctg9290	ctg9290_28602	19	52.386	52.386	AB	AB	AB	AB	AB	AB	AB	AB	AA	AA	AB	AA	AB	BB	BB	AB	AB	AB	AB	AA	AB	AA	BB	AA	BB	AB	BB	AB	AB	AB	AA	AA	AA	BB	AB	AB	AB	AA	AA	BB	BB	BB	AA	AA
189	ctg9290	ctg9290_28617	19	52.386	52.386	AB	AB	AB	AB	AB	AB	AB	AB	AA	AA	AB	AA	AB	BB	BB	AB	AB	AB	AB	AA	AB	AA	BB	AA	BB	AB	BB	AB	AB	AB	AA	AA	AA	BB	AB	AB	AB	AA	AA	BB	BB	BB	AA	AA
190	ctg9290	ctg9290_28647	19	52.386	52.386	AB	AB	AB	AB	AB	AB	AB	AB	AA	AA	AB	AA	AB	BB	BB	AB	AB	AB	AB	AA	AB	AA	BB	AA	BB	AB	BB	AB	AB	AB	AA	AA	AA	BB	AB	AB	AB	AA	AA	BB	BB	BB	AA	AA
191	ctg9290	ctg9290_28650	19	52.386	52.386	AB	AB	AB	AB	AB	AB	AB	AB	AA	AA	AB	AA	AB	BB	BB	AB	AB	AB	AB	AA	AB	AA	BB	AA	BB	AB	BB	AB	AB	AB	AA	AA	AA	BB	AB	AB	AB	AA	AA	BB	BB	BB	AA	AA
192	ctg9290	ctg9290_28733	19	52.386	52.386	AB	AB	AB	AB	AB	AB	AB	AB	AA	AA	AB	AA	AB	BB	BB	AB	AB	AB	AB	AA	AB	AA	BB	AA	BB	AB	BB	AB	AB	AB	AA	AA	AA	BB	AB	AB	AB	AA	AA	BB	BB	BB	AA	AA
193	ctg9290	ctg9290_43853	19	52.386	52.386	AB	AB	AB	AB	AB	AB	AB	AB	AA	AA	AB	AA	AB	BB	BB	AB	AB	AB	AB	AA	AB	AA	BB	AA	BB	AB	BB	AB	AB	AB	AA	AA	AA	BB	AB	AB	AB	AA	AA	BB	BB	BB	AA	AA
194	ctg9290	ctg9290_43964	19	52.386	52.386	AB	AB	AB	AB	AB	AB	AB	AB	AA	AA	AB	AA	AB	BB	BB	AB	AB	AB	AB	AA	AB	AA	BB	AA	BB	AB	BB	AB	AB	AB	AA	AA	AA	BB	AB	AB	AB	AA	AA	BB	BB	BB	AA	AA
195	ctg9290	ctg9290_54278	19	52.386	52.386	AB	AB	AB	AB	AB	AB	AB	AB	AA	AA	AB	AA	AB	BB	BB	AB	AB	AB	AB	AA	AB	AA	BB	AA	BB	AB	BB	AB	AB	AB	AA	AA	AA	BB	AB	AB	AB	AA	AA	BB	BB	BB	AA	AA
196	ctg9290	ctg9290_55490	19	52.386	52.386	AB	AB	AB	AB	AB	AB	AB	AB	AA	AA	AB	AA	AB	BB	BB	AB	AB	AB	AB	AA	AB	AA	BB	AA	BB	AB	BB	AB	AB	AB	AA	AA	AA	BB	AB	AB	AB	AA	AA	BB	BB	BB	AA	AA
197	ctg9290	ctg9290_55494	19	52.386	52.386	AB	AB	AB	AB	AB	AB	AB	AB	AA	AA	AB	AA	AB	BB	BB	AB	AB	AB	AB	AA	AB	AA	BB	AA	BB	AB	BB	AB	AB	AB	AA	AA	AA	BB	AB	AB	AB	AA	AA	BB	BB	BB	AA	AA
198	ctg9290	ctg9290_57483	19	52.386	52.386	AB	AB	AB	AB	AB	AB	AB	AB	AA	AA	AB	AA	AB	BB	BB	AB	AB	AB	AB	AA	AB	AA	BB	AA	BB	AB	BB	AB	AB	AB	AA	AA	AA	BB	AB	AB	AB	AA	AA	BB	BB	BB	AA	AA
199	ctg9290	ctg9290_57498	19	52.386	52.386	AB	AB	AB	AB	AB	AB	AB	AB	AA	AA	AB	AA	AB	BB	BB	AB	AB	AB	AB	AA	AB	AA	BB	AA	BB	AB	BB	AB	AB	AB	AA	AA	AA	BB	AB	AB	AB	AA	AA	BB	BB	BB	AA	AA
200	ctg9290	ctg9290_57986	19	52.386	52.386	AB	AB	AB	AB	AB	AB	AB	AB	AA	AA	AB	AA	AB	BB	BB	AB	AB	AB	AB	AA	AB	AA	BB	AA	BB	AB	BB	AB	AB	AB	AA	AA	AA	BB	AB	AB	AB	AA	AA	BB	BB	BB	AA	AA
201	ctg9294	ctg9294_35559	21	37.843	37.843	AB	AB	AA	BB	BB	BB	AA	AB	AB	AB	BB	AB	AB	BB	AB	AA	AA	AB	AB	BB	AA	AB	AB	AA	AB	BB	AB	BB	BB	BB	AB	BB	AB	AA	AB	AB	AB	AB	AB	AB	AA	AB	AA	AB
202	ctg9294	ctg9294_35679	21	37.843	37.843	AB	AB	AA	BB	BB	BB	AA	AB	AB	AB	BB	AB	AB	BB	AB	AA	AA	AB	AB	BB	AA	AB	AB	AA	AB	BB	AB	BB	BB	BB	AB	BB	AB	AA	AB	AB	AB	AB	AB	AB	AA	AB	AA	AB
203	ctg9294	ctg9294_40639	21	37.843	37.843	AB	AB	AA	BB	BB	BB	AA	AB	AB	AB	BB	AB	AB	BB	AB	AA	AA	AB	AB	BB	AA	AB	AB	AA	AB	BB	AB	BB	BB	BB	AB	BB	AB	AA	AB	AB	AB	AB	AB	AB	AA	AB	AA	AB
204	ctg9294	ctg9294_43442	21	37.843	37.843	AB	AB	AA	BB	BB	BB	AA	AB	AB	AB	BB	AB	AB	BB	AB	AA	AA	AB	AB	BB	AA	AB	AB	AA	AB	BB	AB	BB	BB	BB	AB	BB	AB	AA	AB	AB	AB	AB	AB	AB	AA	AB	AA	AB
205	ctg9294	ctg9294_43486	21	37.843	37.843	AB	AB	AA	BB	BB	BB	AA	AB	AB	AB	BB	AB	AB	BB	AB	AA	AA	AB	AB	BB	AA	AB	AB	AA	AB	BB	AB	BB	BB	BB	AB	BB	AB	AA	AB	AB	AB	AB	AB	AB	AA	AB	AA	AB
206	ctg9294	ctg9294_43724	21	37.843	37.843	AB	AB	AA	BB	BB	BB	AA	AB	AB	AB	BB	AB	AB	BB	AB	AA	AA	AB	AB	BB	AA	AB	AB	AA	AB	BB	AB	BB	BB	BB	AB	BB	AB	AA	AB	AB	AB	AB	AB	AB	AA	AB	AA	AB
207	ctg9294	ctg9294_43743	21	37.843	37.843	AB	AB	AA	BB	BB	BB	AA	AB	AB	AB	BB	AB	AB	BB	AB	AA	AA	AB	AB	BB	AA	AB	AB	AA	AB	BB	AB	BB	BB	BB	AB	BB	AB	AA	AB	AB	AB	AB	AB	AB	AA	AB	AA	AB
208	ctg9294	ctg9294_43805	21	37.843	37.843	AB	AB	AA	BB	BB	BB	AA	AB	AB	AB	BB	AB	AB	BB	AB	AA	AA	AB	AB	BB	AA	AB	AB	AA	AB	BB	AB	BB	BB	BB	AB	BB	AB	AA	AB	AB	AB	AB	AB	AB	AA	AB	AA	AB
209	ctg9294	ctg9294_46495	21	37.843	37.843	AB	AB	AA	BB	BB	BB	AA	AB	AB	AB	BB	AB	AB	BB	AB	AA	AA	AB	AB	BB	AA	AB	AB	AA	AB	BB	AB	BB	BB	BB	AB	BB	AB	AA	AB	AB	AB	AB	AB	AB	AA	AB	AA	AB
210	ctg9294	ctg9294_46516	21	37.843	37.843	AB	AB	AA	BB	BB	BB	AA	AB	AB	AB	BB	AB	AB	BB	AB	AA	AA	AB	AB	BB	AA	AB	AB	AA	AB	BB	AB	BB	BB	BB	AB	BB	AB	AA	AB	AB	AB	AB	AB	AB	AA	AB	AA	AB
211	ctg9294	ctg9294_62070	21	37.843	37.843	AB	AB	AA	BB	BB	BB	AA	AB	AB	AB	BB	AB	AB	BB	AB	AA	AA	AB	AB	BB	AA	AB	AB	AA	AB	BB	AB	BB	BB	BB	AB	BB	AB	AA	AB	AB	AB	AB	AB	AB	AA	AB	AA	AB
212	ctg9294	ctg9294_65636	21	37.843	37.843	AB	AB	AA	BB	BB	BB	AA	AB	AB	AB	BB	AB	AB	BB	AB	AA	AA	AB	AB	BB	AA	AB	AB	AA	AB	BB	AB	BB	BB	BB	AB	BB	AB	AA	AB	AB	AB	AB	AB	AB	AA	AB	AA	AB
213	ctg9294	ctg9294_76731	21	37.843	37.843	AB	AB	AA	BB	BB	BB	AA	AB	AB	AB	BB	AB	AB	BB	AB	AA	AA	AB	AB	BB	AA	AB	AB	AA	AB	BB	AB	BB	BB	BB	AB	BB	AB	AA	AB	AB	AB	AB	AB	AB	AA	AB	AA	AB
214	ctg4668	ctg4668_10393	2	56.772	56.772	AB	AB	AB	AB	BB	AB	AB	AA	AB	AB	BB	AB	BB	AA	AB	BB	AB	AB	AB	AB	BB	AB	AB	AB	AB	AA	AB	AA	AB	AB	BB	AB	BB	AA	BB	AA	AA	AB	AB	AB	BB	AA	BB	AA
215	ctg4668	ctg4668_19205	2	56.772	56.772	AB	AB	AB	AB	BB	AB	AB	AA	AB	AB	BB	AB	BB	AA	AB	BB	AB	AB	AB	AB	BB	AB	AB	AB	AB	AA	AB	AA	AB	AB	BB	AB	BB	AA	BB	AA	AA	AB	AB	AB	BB	AA	BB	AA
216	ctg4668	ctg4668_21453	2	57.443	57.443	AB	AB	AB	AB	BB	AB	AB	AA	AB	AB	BB	AB	BB	AA	AB	BB	AB	AB	AB	AB	BB	AB	AB	AB	AB	AA	AB	AA	AB	AB	BB	AB	BB	AA	BB	AA	AA	AB	AA	AB	BB	AA	BB	AA
217	ctg4668	ctg4668_21507	2	57.443	57.443	AB	AB	AB	AB	BB	AB	AB	AA	AB	AB	BB	AB	BB	AA	AB	BB	AB	AB	AB	AB	BB	AB	AB	AB	AB	AA	AB	AA	AB	AB	BB	AB	BB	AA	BB	AA	AA	AB	AA	AB	BB	AA	BB	AA
218	ctg4668	ctg4668_21656	2	56.772	56.772	AB	AB	AB	AB	BB	AB	AB	AA	AB	AB	BB	AB	BB	AA	AB	BB	AB	AB	AB	AB	BB	AB	AB	AB	AB	AA	AB	AA	AB	AB	BB	AB	BB	AA	BB	AA	AA	AB	AB	AB	BB	AA	BB	AA
220	ctg4668	ctg4668_21692	2	56.772	56.772	AB	AB	AB	AB	BB	AB	AB	AA	AB	AB	BB	AB	BB	AA	AB	BB	AB	AB	AB	AB	BB	AB	AB	AB	AB	AA	AB	AA	AB	AB	BB	AB	BB	AA	BB	AA	AA	AB	AB	AB	BB	AA	BB	AA
221	ctg4668	ctg4668_22774	2	57.443	57.443	AB	AB	AB	AB	BB	AB	AB	AA	AB	AB	BB	AB	BB	AA	AB	BB	AB	AB	AB	AB	BB	AB	AB	AB	AB	AA	AB	AA	AB	AB	BB	AB	BB	AA	BB	AA	AA	AB	AA	AB	BB	AA	BB	AA
224	ctg4668	ctg4668_46293	2	56.772	56.772	AB	AB	AB	AB	BB	AB	AB	AA	AB	AB	BB	AB	BB	AA	AB	BB	AB	AB	AB	AB	BB	AB	AB	AB	AB	AA	AB	AA	AB	AB	BB	AB	BB	AA	BB	AA	AA	AB	AB	AB	BB	AA	BB	AA
225	ctg4668	ctg4668_63568	2	54.087	54.087	AB	AB	AA	AB	BB	AB	AB	AA	AB	AB	BB	AB	AB	AA	AB	BB	AB	AB	AB	AB	BB	AB	AA	AA	AB	AA	AB	AA	AB	AB	BB	AB	BB	AA	BB	AA	AA	AB	AB	AB	BB	AA	BB	AA
226	ctg4668	ctg4668_64056	2	57.443	57.443	AB	AB	AB	AB	BB	AB	AB	AA	AB	AB	BB	AB	BB	AA	AB	BB	AB	AB	AB	AB	BB	AB	AB	AB	AB	AA	AB	AA	AB	AB	BB	AB	BB	AA	BB	AA	AA	AB	AA	AB	BB	AA	BB	AA
227	ctg4668	ctg4668_64060	2	56.772	56.772	AB	AB	AB	AB	BB	AB	AB	AA	AB	AB	BB	AB	BB	AA	AB	BB	AB	AB	AB	AB	BB	AB	AB	AB	AB	AA	AB	AA	AB	AB	BB	AB	BB	AA	BB	AA	AA	AB	AB	AB	BB	AA	BB	AA
228	ctg4668	ctg4668_64071	2	57.443	57.443	AB	AB	AB	AB	BB	AB	AB	AA	AB	AB	BB	AB	BB	AA	AB	BB	AB	AB	AB	AB	BB	AB	AB	AB	AB	AA	AB	AA	AB	AB	BB	AB	BB	AA	BB	AA	AA	AB	AA	AB	BB	AA	BB	AA
229	ctg4668	ctg4668_64316	2	56.772	56.772	AB	AB	AB	AB	BB	AB	AB	AA	AB	AB	BB	AB	BB	AA	AB	BB	AB	AB	AB	AB	BB	AB	AB	AB	AB	AA	AB	AA	AB	AB	BB	AB	BB	AA	BB	AA	AA	AB	AB	AB	BB	AA	BB	AA
230	ctg4668	ctg4668_65870	2	56.772	56.772	AB	AB	AB	AB	BB	AB	AB	AA	AB	AB	BB	AB	BB	AA	AB	BB	AB	AB	AB	AB	BB	AB	AB	AB	AB	AA	AB	AA	AB	AB	BB	AB	BB	AA	BB	AA	AA	AB	AB	AB	BB	AA	BB	AA
231	ctg4668	ctg4668_68039	2	56.772	56.772	AB	AB	AB	AB	BB	AB	AB	AA	AB	AB	BB	AB	BB	AA	AB	BB	AB	AB	AB	AB	BB	AB	AB	AB	AB	AA	AB	AA	AB	AB	BB	AB	BB	AA	BB	AA	AA	AB	AB	AB	BB	AA	BB	AA
233	ctg4668	ctg4668_68126	2	56.772	56.772	AB	AB	AB	AB	BB	AB	AB	AA	AB	AB	BB	AB	BB	AA	AB	BB	AB	AB	AB	AB	BB	AB	AB	AB	AB	AA	AB	AA	AB	AB	BB	AB	BB	AA	BB	AA	AA	AB	AB	AB	BB	AA	BB	AA
235	ctg4668	ctg4668_69161	2	56.772	56.772	AB	AB	AB	AB	BB	AB	AB	AA	AB	AB	BB	AB	BB	AA	AB	BB	AB	AB	AB	AB	BB	AB	AB	AB	AB	AA	AB	AA	AB	AB	BB	AB	BB	AA	BB	AA	AA	AB	AB	AB	BB	AA	BB	AA
236	ctg4668	ctg4668_69165	2	56.772	56.772	AB	AB	AB	AB	BB	AB	AB	AA	AB	AB	BB	AB	BB	AA	AB	BB	AB	AB	AB	AB	BB	AB	AB	AB	AB	AA	AB	AA	AB	AB	BB	AB	BB	AA	BB	AA	AA	AB	AB	AB	BB	AA	BB	AA
237	ctg4668	ctg4668_69173	2	56.772	56.772	AB	AB	AB	AB	BB	AB	AB	AA	AB	AB	BB	AB	BB	AA	AB	BB	AB	AB	AB	AB	BB	AB	AB	AB	AB	AA	AB	AA	AB	AB	BB	AB	BB	AA	BB	AA	AA	AB	AB	AB	BB	AA	BB	AA
240	ctg4668	ctg4668_70792	2	59.456	59.456	AB	AB	BB	AB	BB	AB	AB	AA	AB	AB	BB	AB	BB	AA	AB	BB	AB	AB	AB	AB	BB	AB	AB	AB	AB	AA	AB	AA	AB	AB	BB	AB	BB	AA	BB	AA	AA	AB	AA	AB	BB	AA	BB	AA
245	ctg4668	ctg4668_70955	2	56.772	56.772	AB	AB	AB	AB	BB	AB	AB	AA	AB	AB	BB	AB	BB	AA	AB	BB	AB	AB	AB	AB	BB	AB	AB	AB	AB	AA	AB	AA	AB	AB	BB	AB	BB	AA	BB	AA	AA	AB	AB	AB	BB	AA	BB	AA
250	ctg4668	ctg4668_74772	2	56.772	56.772	AB	AB	AB	AB	BB	AB	AB	AA	AB	AB	BB	AB	BB	AA	AB	BB	AB	AB	AB	AB	BB	AB	AB	AB	AB	AA	AB	AA	AB	AB	BB	AB	BB	AA	BB	AA	AA	AB	AB	AB	BB	AA	BB	AA
251	ctg4668	ctg4668_74831	2	56.772	56.772	AB	AB	AB	AB	BB	AB	AB	AA	AB	AB	BB	AB	BB	AA	AB	BB	AB	AB	AB	AB	BB	AB	AB	AB	AB	AA	AB	AA	AB	AB	BB	AB	BB	AA	BB	AA	AA	AB	AB	AB	BB	AA	BB	AA
252	ctg4668	ctg4668_74897	2	56.772	56.772	AB	AB	AB	AB	BB	AB	AB	AA	AB	AB	BB	AB	BB	AA	AB	BB	AB	AB	AB	AB	BB	AB	AB	AB	AB	AA	AB	AA	AB	AB	BB	AB	BB	AA	BB	AA	AA	AB	AB	AB	BB	AA	BB	AA
253	ctg4668	ctg4668_81943	2	56.772	56.772	AB	AB	AB	AB	BB	AB	AB	AA	AB	AB	BB	AB	BB	AA	AB	BB	AB	AB	AB	AB	BB	AB	AB	AB	AB	AA	AB	AA	AB	AB	BB	AB	BB	AA	BB	AA	AA	AB	AB	AB	BB	AA	BB	AA
254	ctg4668	ctg4668_96448	2	57.443	57.443	AB	AB	AB	AB	BB	AB	AB	AA	AB	AB	BB	AB	BB	AA	AB	BB	AB	AB	AB	AB	BB	AB	AB	AB	AB	AA	AB	AA	AB	AB	BB	AB	BB	AA	BB	AA	AA	AB	AA	AB	BB	AA	BB	AA
257	ctg4668	ctg4668_98875	2	57.443	57.443	AB	AB	AB	AB	BB	AB	AB	AA	AB	AB	BB	AB	BB	AA	AB	BB	AB	AB	AB	AB	BB	AB	AB	AB	AB	AA	AB	AA	AB	AB	BB	AB	BB	AA	BB	AA	AA	AB	AA	AB	BB	AA	BB	AA
258	ctg4668	ctg4668_103790	2	56.772	56.772	AB	AB	AB	AB	BB	AB	AB	AA	AB	AB	BB	AB	BB	AA	AB	BB	AB	AB	AB	AB	BB	AB	AB	AB	AB	AA	AB	AA	AB	AB	BB	AB	BB	AA	BB	AA	AA	AB	AB	AB	BB	AA	BB	AA
259	ctg4668	ctg4668_104962	2	56.772	56.772	AB	AB	AB	AB	BB	AB	AB	AA	AB	AB	BB	AB	BB	AA	AB	BB	AB	AB	AB	AB	BB	AB	AB	AB	AB	AA	AB	AA	AB	AB	BB	AB	BB	AA	BB	AA	AA	AB	AB	AB	BB	AA	BB	AA
260	ctg4668	ctg4668_106439	2	56.772	56.772	AB	AB	AB	AB	BB	AB	AB	AA	AB	AB	BB	AB	BB	AA	AB	BB	AB	AB	AB	AB	BB	AB	AB	AB	AB	AA	AB	AA	AB	AB	BB	AB	BB	AA	BB	AA	AA	AB	AB	AB	BB	AA	BB	AA
261	ctg4668	ctg4668_106492	2	56.772	56.772	AB	AB	AB	AB	BB	AB	AB	AA	AB	AB	BB	AB	BB	AA	AB	BB	AB	AB	AB	AB	BB	AB	AB	AB	AB	AA	AB	AA	AB	AB	BB	AB	BB	AA	BB	AA	AA	AB	AB	AB	BB	AA	BB	AA
262	ctg4668	ctg4668_108980	2	56.772	56.772	AB	AB	AB	AB	BB	AB	AB	AA	AB	AB	BB	AB	BB	AA	AB	BB	AB	AB	AB	AB	BB	AB	AB	AB	AB	AA	AB	AA	AB	AB	BB	AB	BB	AA	BB	AA	AA	AB	AB	AB	BB	AA	BB	AA
263	ctg4668	ctg4668_109479	2	56.772	56.772	AB	AB	AB	AB	BB	AB	AB	AA	AB	AB	BB	AB	BB	AA	AB	BB	AB	AB	AB	AB	BB	AB	AB	AB	AB	AA	AB	AA	AB	AB	BB	AB	BB	AA	BB	AA	AA	AB	AB	AB	BB	AA	BB	AA
264	ctg4668	ctg4668_109488	2	56.772	56.772	AB	AB	AB	AB	BB	AB	AB	AA	AB	AB	BB	AB	BB	AA	AB	BB	AB	AB	AB	AB	BB	AB	AB	AB	AB	AA	AB	AA	AB	AB	BB	AB	BB	AA	BB	AA	AA	AB	AB	AB	BB	AA	BB	AA
266	ctg4668	ctg4668_109527	2	56.772	56.772	AB	AB	AB	AB	BB	AB	AB	AA	AB	AB	BB	AB	BB	AA	AB	BB	AB	AB	AB	AB	BB	AB	AB	AB	AB	AA	AB	AA	AB	AB	BB	AB	BB	AA	BB	AA	AA	AB	AB	AB	BB	AA	BB	AA
267	ctg4668	ctg4668_109750	2	56.772	56.772	AB	AB	AB	AB	BB	AB	AB	AA	AB	AB	BB	AB	BB	AA	AB	BB	AB	AB	AB	AB	BB	AB	AB	AB	AB	AA	AB	AA	AB	AB	BB	AB	BB	AA	BB	AA	AA	AB	AB	AB	BB	AA	BB	AA
268	ctg4668	ctg4668_118343	2	56.772	56.772	AB	AB	AB	AB	BB	AB	AB	AA	AB	AB	BB	AB	BB	AA	AB	BB	AB	AB	AB	AB	BB	AB	AB	AB	AB	AA	AB	AA	AB	AB	BB	AB	BB	AA	BB	AA	AA	AB	AB	AB	BB	AA	BB	AA
269	ctg4668	ctg4668_118373	2	56.772	56.772	AB	AB	AB	AB	BB	AB	AB	AA	AB	AB	BB	AB	BB	AA	AB	BB	AB	AB	AB	AB	BB	AB	AB	AB	AB	AA	AB	AA	AB	AB	BB	AB	BB	AA	BB	AA	AA	AB	AB	AB	BB	AA	BB	AA
270	ctg4668	ctg4668_118571	2	56.772	56.772	AB	AB	AB	AB	BB	AB	AB	AA	AB	AB	BB	AB	BB	AA	AB	BB	AB	AB	AB	AB	BB	AB	AB	AB	AB	AA	AB	AA	AB	AB	BB	AB	BB	AA	BB	AA	AA	AB	AB	AB	BB	AA	BB	AA
272	ctg4668	ctg4668_121970	2	57.443	57.443	AB	AB	AB	AB	BB	AB	AB	AA	AB	AB	BB	AB	BB	AA	AB	BB	AB	AB	AB	AB	BB	AB	AB	AB	AB	AA	AB	AA	AB	AB	BB	AB	BB	AA	BB	AA	AA	AB	AA	AB	BB	AA	BB	AA
273	ctg9299	ctg9299_49034	1	107.374	107.374	AB	AB	AA	BB	BB	AB	BB	AB	AB	AB	AB	AB	AB	BB	AB	AB	AB	AA	BB	AA	AB	AB	AB	BB	BB	BB	AB	AA	AB	AB	BB	AB	AB	AB	AB	AB	AB	AB	AA	AB	AB	AB	BB	AB
274	ctg9299	ctg9299_49104	1	107.374	107.374	AB	AB	AA	BB	BB	AB	BB	AB	AB	AB	AB	AB	AB	BB	AB	AB	AB	AA	BB	AA	AB	AB	AB	BB	BB	BB	AB	AA	AB	AB	BB	AB	AB	AB	AB	AB	AB	AB	AA	AB	AB	AB	BB	AB
275	ctg9299	ctg9299_49141	1	107.374	107.374	AB	AB	AA	BB	BB	AB	BB	AB	AB	AB	AB	AB	AB	BB	AB	AB	AB	AA	BB	AA	AB	AB	AB	BB	BB	BB	AB	AA	AB	AB	BB	AB	AB	AB	AB	AB	AB	AB	AA	AB	AB	AB	BB	AB
276	ctg9299	ctg9299_49152	1	108.045	108.045	AB	AB	AA	BB	BB	AB	BB	AB	AB	AB	AB	AB	AB	BB	AB	AB	AB	AA	BB	AA	AB	AB	AB	BB	BB	BB	AB	AA	AB	AB	BB	AB	AA	AB	AB	AB	AB	AB	AA	AB	AB	AB	BB	AB
277	ctg9299	ctg9299_49256	1	109.388	109.388	AB	AB	AA	BB	BB	AB	BB	AB	AB	AB	AB	AB	AB	BB	AB	AB	AB	AA	BB	AA	AB	AB	AB	BB	BB	BB	AB	AB	AB	BB	BB	AB	AA	AB	AB	AB	AB	AB	AA	AB	AB	AB	BB	AB
278	ctg9299	ctg9299_49360	1	107.374	107.374	AB	AB	AA	BB	BB	AB	BB	AB	AB	AB	AB	AB	AB	BB	AB	AB	AB	AA	BB	AA	AB	AB	AB	BB	BB	BB	AB	AA	AB	AB	BB	AB	AB	AB	AB	AB	AB	AB	AA	AB	AB	AB	BB	AB
279	ctg9299	ctg9299_49402	1	107.374	107.374	AB	AB	AA	BB	BB	AB	BB	AB	AB	AB	AB	AB	AB	BB	AB	AB	AB	AA	BB	AA	AB	AB	AB	BB	BB	BB	AB	AA	AB	AB	BB	AB	AB	AB	AB	AB	AB	AB	AA	AB	AB	AB	BB	AB
280	ctg9299	ctg9299_49426	1	107.374	107.374	AB	AB	AA	BB	BB	AB	BB	AB	AB	AB	AB	AB	AB	BB	AB	AB	AB	AA	BB	AA	AB	AB	AB	BB	BB	BB	AB	AA	AB	AB	BB	AB	AB	AB	AB	AB	AB	AB	AA	AB	AB	AB	BB	AB
281	ctg9299	ctg9299_49497	1	107.374	107.374	AB	AB	AA	BB	BB	AB	BB	AB	AB	AB	AB	AB	AB	BB	AB	AB	AB	AA	BB	AA	AB	AB	AB	BB	BB	BB	AB	AA	AB	AB	BB	AB	AB	AB	AB	AB	AB	AB	AA	AB	AB	AB	BB	AB
282	ctg9299	ctg9299_50834	1	107.374	107.374	AB	AB	AA	BB	BB	AB	BB	AB	AB	AB	AB	AB	AB	BB	AB	AB	AB	AA	BB	AA	AB	AB	AB	BB	BB	BB	AB	AA	AB	AB	BB	AB	AB	AB	AB	AB	AB	AB	AA	AB	AB	AB	BB	AB
283	ctg9299	ctg9299_51145	1	107.374	107.374	AB	AB	AA	BB	BB	AB	BB	AB	AB	AB	AB	AB	AB	BB	AB	AB	AB	AA	BB	AA	AB	AB	AB	BB	BB	BB	AB	AA	AB	AB	BB	AB	AB	AB	AB	AB	AB	AB	AA	AB	AB	AB	BB	AB
284	ctg9299	ctg9299_51154	1	107.374	107.374	AB	AB	AA	BB	BB	AB	BB	AB	AB	AB	AB	AB	AB	BB	AB	AB	AB	AA	BB	AA	AB	AB	AB	BB	BB	BB	AB	AA	AB	AB	BB	AB	AB	AB	AB	AB	AB	AB	AA	AB	AB	AB	BB	AB
285	ctg9299	ctg9299_58448	1	107.374	107.374	AB	AB	AA	BB	BB	AB	BB	AB	AB	AB	AB	AB	AB	BB	AB	AB	AB	AA	BB	AA	AB	AB	AB	BB	BB	BB	AB	AA	AB	AB	BB	AB	AB	AB	AB	AB	AB	AB	AA	AB	AB	AB	BB	AB
286	ctg9299	ctg9299_61590	1	107.374	107.374	AB	AB	AA	BB	BB	AB	BB	AB	AB	AB	AB	AB	AB	BB	AB	AB	AB	AA	BB	AA	AB	AB	AB	BB	BB	BB	AB	AA	AB	AB	BB	AB	AB	AB	AB	AB	AB	AB	AA	AB	AB	AB	BB	AB
287	ctg9299	ctg9299_68726	1	107.374	107.374	AB	AB	AA	BB	BB	AB	BB	AB	AB	AB	AB	AB	AB	BB	AB	AB	AB	AA	BB	AA	AB	AB	AB	BB	BB	BB	AB	AA	AB	AB	BB	AB	AB	AB	AB	AB	AB	AB	AA	AB	AB	AB	BB	AB
288	ctg9299	ctg9299_71116	1	107.374	107.374	AB	AB	AA	BB	BB	AB	BB	AB	AB	AB	AB	AB	AB	BB	AB	AB	AB	AA	BB	AA	AB	AB	AB	BB	BB	BB	AB	AA	AB	AB	BB	AB	AB	AB	AB	AB	AB	AB	AA	AB	AB	AB	BB	AB
289	ctg9299	ctg9299_73933	1	107.374	107.374	AB	AB	AA	BB	BB	AB	BB	AB	AB	AB	AB	AB	AB	BB	AB	AB	AB	AA	BB	AA	AB	AB	AB	BB	BB	BB	AB	AA	AB	AB	BB	AB	AB	AB	AB	AB	AB	AB	AA	AB	AB	AB	BB	AB
290	ctg9299	ctg9299_74777	1	107.374	107.374	AB	AB	AA	BB	BB	AB	BB	AB	AB	AB	AB	AB	AB	BB	AB	AB	AB	AA	BB	AA	AB	AB	AB	BB	BB	BB	AB	AA	AB	AB	BB	AB	AB	AB	AB	AB	AB	AB	AA	AB	AB	AB	BB	AB
291	ctg9299	ctg9299_76462	1	107.374	107.374	AB	AB	AA	BB	BB	AB	BB	AB	AB	AB	AB	AB	AB	BB	AB	AB	AB	AA	BB	AA	AB	AB	AB	BB	BB	BB	AB	AA	AB	AB	BB	AB	AB	AB	AB	AB	AB	AB	AA	AB	AB	AB	BB	AB
292	ctg9299	ctg9299_76478	1	107.374	107.374	AB	AB	AA	BB	BB	AB	BB	AB	AB	AB	AB	AB	AB	BB	AB	AB	AB	AA	BB	AA	AB	AB	AB	BB	BB	BB	AB	AA	AB	AB	BB	AB	AB	AB	AB	AB	AB	AB	AA	AB	AB	AB	BB	AB
293	ctg4665	ctg4665_117571	15	40.182	40.182	AB	AB	AB	AB	AB	AB	AB	AA	AB	AB	AB	AA	AB	BB	BB	AA	AB	AB	AB	AA	AB	AB	AB	AA	AA	AA	AB	AB	BB	BB	AB	AB	AB	AB	AB	AB	AB	AB	AB	AB	AB	BB	AB	AB
294	ctg4665	ctg4665_122150	15	40.182	40.182	AB	AB	AB	AB	AB	AB	AB	AA	AB	AB	AB	AA	AB	BB	BB	AA	AB	AB	AB	AA	AB	AB	AB	AA	AA	AA	AB	AB	BB	BB	AB	AB	AB	AB	AB	AB	AB	AB	AB	AB	AB	BB	AB	AB
297	ctg4665	ctg4665_133822	15	40.182	40.182	AB	AB	AB	AB	AB	AB	AB	AA	AB	AB	AB	AA	AB	BB	BB	AA	AB	AB	AB	AA	AB	AB	AB	AA	AA	AA	AB	AB	BB	BB	AB	AB	AB	AB	AB	AB	AB	AB	AB	AB	AB	BB	AB	AB
300	ctg4665	ctg4665_135566	15	40.182	40.182	AB	AB	AB	AB	AB	AB	AB	AA	AB	AB	AB	AA	AB	BB	BB	AA	AB	AB	AB	AA	AB	AB	AB	AA	AA	AA	AB	AB	BB	BB	AB	AB	AB	AB	AB	AB	AB	AB	AB	AB	AB	BB	AB	AB
301	ctg4665	ctg4665_136079	15	40.182	40.182	AB	AB	AB	AB	AB	AB	AB	AA	AB	AB	AB	AA	AB	BB	BB	AA	AB	AB	AB	AA	AB	AB	AB	AA	AA	AA	AB	AB	BB	BB	AB	AB	AB	AB	AB	AB	AB	AB	AB	AB	AB	BB	AB	AB
302	ctg4665	ctg4665_142671	15	40.182	40.182	AB	AB	AB	AB	AB	AB	AB	AA	AB	AB	AB	AA	AB	BB	BB	AA	AB	AB	AB	AA	AB	AB	AB	AA	AA	AA	AB	AB	BB	BB	AB	AB	AB	AB	AB	AB	AB	AB	AB	AB	AB	BB	AB	AB
303	ctg4665	ctg4665_155240	15	40.182	40.182	AB	AB	AB	AB	AB	AB	AB	AA	AB	AB	AB	AA	AB	BB	BB	AA	AB	AB	AB	AA	AB	AB	AB	AA	AA	AA	AB	AB	BB	BB	AB	AB	AB	AB	AB	AB	AB	AB	AB	AB	AB	BB	AB	AB
304	ctg4665	ctg4665_170028	15	40.182	40.182	AB	AB	AB	AB	AB	AB	AB	AA	AB	AB	AB	AA	AB	BB	BB	AA	AB	AB	AB	AA	AB	AB	AB	AA	AA	AA	AB	AB	BB	BB	AB	AB	AB	AB	AB	AB	AB	AB	AB	AB	AB	BB	AB	AB
305	ctg4665	ctg4665_170247	15	40.182	40.182	AB	AB	AB	AB	AB	AB	AB	AA	AB	AB	AB	AA	AB	BB	BB	AA	AB	AB	AB	AA	AB	AB	AB	AA	AA	AA	AB	AB	BB	BB	AB	AB	AB	AB	AB	AB	AB	AB	AB	AB	AB	BB	AB	AB
332	ctg4663	ctg4663_1615	20	37.12	37.12	AB	AB	BB	BB	AB	BB	AB	BB	AB	AB	BB	AB	AB	AB	AA	AB	AB	AA	AB	AB	AB	AA	BB	AA	BB	BB	AB	BB	AB	AB	AB	AB	AB	AB	AB	BB	BB	AA	AB	AB	BB	BB	AB	BB
333	ctg4663	ctg4663_1688	20	37.12	37.12	AB	AB	BB	BB	AB	BB	AB	BB	AB	AB	BB	AB	AB	AB	AA	AB	AB	AA	AB	AB	AB	AA	BB	AA	BB	BB	AB	BB	AB	AB	AB	AB	AB	AB	AB	BB	BB	AA	AB	AB	BB	BB	AB	BB
334	ctg4663	ctg4663_3278	20	37.12	37.12	AB	AB	BB	BB	AB	BB	AB	BB	AB	AB	BB	AB	AB	AB	AA	AB	AB	AA	AB	AB	AB	AA	BB	AA	BB	BB	AB	BB	AB	AB	AB	AB	AB	AB	AB	BB	BB	AA	AB	AB	BB	BB	AB	BB
335	ctg4663	ctg4663_3281	20	37.12	37.12	AB	AB	BB	BB	AB	BB	AB	BB	AB	AB	BB	AB	AB	AB	AA	AB	AB	AA	AB	AB	AB	AA	BB	AA	BB	BB	AB	BB	AB	AB	AB	AB	AB	AB	AB	BB	BB	AA	AB	AB	BB	BB	AB	BB
336	ctg4663	ctg4663_6554	20	37.12	37.12	AB	AB	BB	BB	AB	BB	AB	BB	AB	AB	BB	AB	AB	AB	AA	AB	AB	AA	AB	AB	AB	AA	BB	AA	BB	BB	AB	BB	AB	AB	AB	AB	AB	AB	AB	BB	BB	AA	AB	AB	BB	BB	AB	BB
337	ctg4663	ctg4663_13554	20	37.12	37.12	AB	AB	BB	BB	AB	BB	AB	BB	AB	AB	BB	AB	AB	AB	AA	AB	AB	AA	AB	AB	AB	AA	BB	AA	BB	BB	AB	BB	AB	AB	AB	AB	AB	AB	AB	BB	BB	AA	AB	AB	BB	BB	AB	BB
338	ctg4663	ctg4663_15249	20	37.12	37.12	AB	AB	BB	BB	AB	BB	AB	BB	AB	AB	BB	AB	AB	AB	AA	AB	AB	AA	AB	AB	AB	AA	BB	AA	BB	BB	AB	BB	AB	AB	AB	AB	AB	AB	AB	BB	BB	AA	AB	AB	BB	BB	AB	BB
339	ctg4663	ctg4663_26397	20	37.12	37.12	AB	AB	BB	BB	AB	BB	AB	BB	AB	AB	BB	AB	AB	AB	AA	AB	AB	AA	AB	AB	AB	AA	BB	AA	BB	BB	AB	BB	AB	AB	AB	AB	AB	AB	AB	BB	BB	AA	AB	AB	BB	BB	AB	BB
340	ctg4663	ctg4663_33252	20	37.12	37.12	AB	AB	BB	BB	AB	BB	AB	BB	AB	AB	BB	AB	AB	AB	AA	AB	AB	AA	AB	AB	AB	AA	BB	AA	BB	BB	AB	BB	AB	AB	AB	AB	AB	AB	AB	BB	BB	AA	AB	AB	BB	BB	AB	BB
341	ctg4663	ctg4663_34601	20	37.12	37.12	AB	AB	BB	BB	AB	BB	AB	BB	AB	AB	BB	AB	AB	AB	AA	AB	AB	AA	AB	AB	AB	AA	BB	AA	BB	BB	AB	BB	AB	AB	AB	AB	AB	AB	AB	BB	BB	AA	AB	AB	BB	BB	AB	BB
342	ctg4663	ctg4663_41369	20	37.12	37.12	AB	AB	BB	BB	AB	BB	AB	BB	AB	AB	BB	AB	AB	AB	AA	AB	AB	AA	AB	AB	AB	AA	BB	AA	BB	BB	AB	BB	AB	AB	AB	AB	AB	AB	AB	BB	BB	AA	AB	AB	BB	BB	AB	BB
353	ctg4663	ctg4663_88471	20	37.12	37.12	AB	AB	BB	BB	AB	BB	AB	BB	AB	AB	BB	AB	AB	AB	AA	AB	AB	AA	AB	AB	AB	AA	BB	AA	BB	BB	AB	BB	AB	AB	AB	AB	AB	AB	AB	BB	BB	AA	AB	AB	BB	BB	AB	BB
354	ctg4663	ctg4663_88583	20	37.12	37.12	AB	AB	BB	BB	AB	BB	AB	BB	AB	AB	BB	AB	AB	AB	AA	AB	AB	AA	AB	AB	AB	AA	BB	AA	BB	BB	AB	BB	AB	AB	AB	AB	AB	AB	AB	BB	BB	AA	AB	AB	BB	BB	AB	BB
356	ctg4663	ctg4663_88706	20	36.449	36.449	AB	AB	BB	BB	AB	BB	AB	BB	AB	AB	BB	AB	AB	AB	AB	AB	AB	AA	AB	AB	AB	AA	BB	AA	BB	BB	AB	BB	AB	AB	AB	AB	AB	AB	AB	BB	BB	AA	AB	AB	BB	BB	AB	BB
357	ctg4663	ctg4663_88783	20	37.12	37.12	AB	AB	BB	BB	AB	BB	AB	BB	AB	AB	BB	AB	AB	AB	AA	AB	AB	AA	AB	AB	AB	AA	BB	AA	BB	BB	AB	BB	AB	AB	AB	AB	AB	AB	AB	BB	BB	AA	AB	AB	BB	BB	AB	BB
358	ctg4663	ctg4663_89096	20	36.449	36.449	AB	AB	BB	BB	AB	BB	AB	BB	AB	AB	BB	AB	AB	AB	AB	AB	AB	AA	AB	AB	AB	AA	BB	AA	BB	BB	AB	BB	AB	AB	AB	AB	AB	AB	AB	BB	BB	AA	AB	AB	BB	BB	AB	BB
359	ctg4663	ctg4663_89769	20	36.449	36.449	AB	AB	BB	BB	AB	BB	AB	BB	AB	AB	BB	AB	AB	AB	AB	AB	AB	AA	AB	AB	AB	AA	BB	AA	BB	BB	AB	BB	AB	AB	AB	AB	AB	AB	AB	BB	BB	AA	AB	AB	BB	BB	AB	BB
360	ctg4663	ctg4663_89775	20	36.449	36.449	AB	AB	BB	BB	AB	BB	AB	BB	AB	AB	BB	AB	AB	AB	AB	AB	AB	AA	AB	AB	AB	AA	BB	AA	BB	BB	AB	BB	AB	AB	AB	AB	AB	AB	AB	BB	BB	AA	AB	AB	BB	BB	AB	BB
361	ctg4663	ctg4663_90376	20	36.449	36.449	AB	AB	BB	BB	AB	BB	AB	BB	AB	AB	BB	AB	AB	AB	AB	AB	AB	AA	AB	AB	AB	AA	BB	AA	BB	BB	AB	BB	AB	AB	AB	AB	AB	AB	AB	BB	BB	AA	AB	AB	BB	BB	AB	BB
362	ctg4663	ctg4663_103566	20	36.449	36.449	AB	AB	BB	BB	AB	BB	AB	BB	AB	AB	BB	AB	AB	AB	AB	AB	AB	AA	AB	AB	AB	AA	BB	AA	BB	BB	AB	BB	AB	AB	AB	AB	AB	AB	AB	BB	BB	AA	AB	AB	BB	BB	AB	BB
363	ctg4663	ctg4663_103585	20	38.471	38.471	AB	AB	BB	BB	AB	BB	AB	BB	AB	AB	BB	AB	AB	AB	AA	AB	AB	AA	AB	AB	AB	AA	BB	AA	BB	BB	AB	BB	AB	AB	AB	AB	AB	AB	AB	BB	BB	AA	AB	AB	BB	AB	AB	BB
364	ctg4663	ctg4663_103587	20	25.701	25.701	AB	AB	BB	BB	AB	BB	AB	BB	AB	AB	BB	AB	BB	AB	AB	AB	AB	AA	AB	AB	AB	AA	BB	AA	BB	BB	AB	AB	AB	AA	AB	AB	BB	AB	AA	BB	BB	AA	AB	AB	AB	BB	BB	BB
365	ctg4663	ctg4663_104434	20	36.449	36.449	AB	AB	BB	BB	AB	BB	AB	BB	AB	AB	BB	AB	AB	AB	AB	AB	AB	AA	AB	AB	AB	AA	BB	AA	BB	BB	AB	BB	AB	AB	AB	AB	AB	AB	AB	BB	BB	AA	AB	AB	BB	BB	AB	BB
366	ctg4663	ctg4663_104618	20	36.449	36.449	AB	AB	BB	BB	AB	BB	AB	BB	AB	AB	BB	AB	AB	AB	AB	AB	AB	AA	AB	AB	AB	AA	BB	AA	BB	BB	AB	BB	AB	AB	AB	AB	AB	AB	AB	BB	BB	AA	AB	AB	BB	BB	AB	BB
368	ctg4663	ctg4663_104739	20	36.449	36.449	AB	AB	BB	BB	AB	BB	AB	BB	AB	AB	BB	AB	AB	AB	AB	AB	AB	AA	AB	AB	AB	AA	BB	AA	BB	BB	AB	BB	AB	AB	AB	AB	AB	AB	AB	BB	BB	AA	AB	AB	BB	BB	AB	BB
369	ctg4663	ctg4663_104743	20	37.12	37.12	AB	AB	BB	BB	AB	BB	AB	BB	AB	AB	BB	AB	AB	AB	AA	AB	AB	AA	AB	AB	AB	AA	BB	AA	BB	BB	AB	BB	AB	AB	AB	AB	AB	AB	AB	BB	BB	AA	AB	AB	BB	BB	AB	BB
370	ctg4663	ctg4663_104759	20	36.449	36.449	AB	AB	BB	BB	AB	BB	AB	BB	AB	AB	BB	AB	AB	AB	AB	AB	AB	AA	AB	AB	AB	AA	BB	AA	BB	BB	AB	BB	AB	AB	AB	AB	AB	AB	AB	BB	BB	AA	AB	AB	BB	BB	AB	BB
372	ctg4663	ctg4663_123820	20	37.12	37.12	AB	AB	BB	BB	AB	BB	AB	BB	AB	AB	BB	AB	AB	AB	AA	AB	AB	AA	AB	AB	AB	AA	BB	AA	BB	BB	AB	BB	AB	AB	AB	AB	AB	AB	AB	BB	BB	AA	AB	AB	BB	BB	AB	BB
373	ctg4663	ctg4663_149334	20	37.12	37.12	AB	AB	BB	BB	AB	BB	AB	BB	AB	AB	BB	AB	AB	AB	AA	AB	AB	AA	AB	AB	AB	AA	BB	AA	BB	BB	AB	BB	AB	AB	AB	AB	AB	AB	AB	BB	BB	AA	AB	AB	BB	BB	AB	BB
374	ctg4663	ctg4663_149656	20	36.449	36.449	AB	AB	BB	BB	AB	BB	AB	BB	AB	AB	BB	AB	AB	AB	AB	AB	AB	AA	AB	AB	AB	AA	BB	AA	BB	BB	AB	BB	AB	AB	AB	AB	AB	AB	AB	BB	BB	AA	AB	AB	BB	BB	AB	BB
375	ctg4663	ctg4663_149705	20	37.12	37.12	AB	AB	BB	BB	AB	BB	AB	BB	AB	AB	BB	AB	AB	AB	AA	AB	AB	AA	AB	AB	AB	AA	BB	AA	BB	BB	AB	BB	AB	AB	AB	AB	AB	AB	AB	BB	BB	AA	AB	AB	BB	BB	AB	BB
376	ctg4663	ctg4663_149879	20	37.12	37.12	AB	AB	BB	BB	AB	BB	AB	BB	AB	AB	BB	AB	AB	AB	AA	AB	AB	AA	AB	AB	AB	AA	BB	AA	BB	BB	AB	BB	AB	AB	AB	AB	AB	AB	AB	BB	BB	AA	AB	AB	BB	BB	AB	BB
377	ctg4663	ctg4663_149883	20	37.12	37.12	AB	AB	BB	BB	AB	BB	AB	BB	AB	AB	BB	AB	AB	AB	AA	AB	AB	AA	AB	AB	AB	AA	BB	AA	BB	BB	AB	BB	AB	AB	AB	AB	AB	AB	AB	BB	BB	AA	AB	AB	BB	BB	AB	BB
378	ctg4663	ctg4663_149974	20	37.12	37.12	AB	AB	BB	BB	AB	BB	AB	BB	AB	AB	BB	AB	AB	AB	AA	AB	AB	AA	AB	AB	AB	AA	BB	AA	BB	BB	AB	BB	AB	AB	AB	AB	AB	AB	AB	BB	BB	AA	AB	AB	BB	BB	AB	BB
379	ctg4663	ctg4663_150524	20	37.12	37.12	AB	AB	BB	BB	AB	BB	AB	BB	AB	AB	BB	AB	AB	AB	AA	AB	AB	AA	AB	AB	AB	AA	BB	AA	BB	BB	AB	BB	AB	AB	AB	AB	AB	AB	AB	BB	BB	AA	AB	AB	BB	BB	AB	BB
380	ctg4663	ctg4663_150525	20	36.449	36.449	AB	AB	BB	BB	AB	BB	AB	BB	AB	AB	BB	AB	AB	AB	AB	AB	AB	AA	AB	AB	AB	AA	BB	AA	BB	BB	AB	BB	AB	AB	AB	AB	AB	AB	AB	BB	BB	AA	AB	AB	BB	BB	AB	BB
381	ctg4663	ctg4663_150572	20	36.449	36.449	AB	AB	BB	BB	AB	BB	AB	BB	AB	AB	BB	AB	AB	AB	AB	AB	AB	AA	AB	AB	AB	AA	BB	AA	BB	BB	AB	BB	AB	AB	AB	AB	AB	AB	AB	BB	BB	AA	AB	AB	BB	BB	AB	BB
382	ctg4663	ctg4663_150867	20	36.449	36.449	AB	AB	BB	BB	AB	BB	AB	BB	AB	AB	BB	AB	AB	AB	AB	AB	AB	AA	AB	AB	AB	AA	BB	AA	BB	BB	AB	BB	AB	AB	AB	AB	AB	AB	AB	BB	BB	AA	AB	AB	BB	BB	AB	BB
383	ctg4663	ctg4663_150930	20	36.449	36.449	AB	AB	BB	BB	AB	BB	AB	BB	AB	AB	BB	AB	AB	AB	AB	AB	AB	AA	AB	AB	AB	AA	BB	AA	BB	BB	AB	BB	AB	AB	AB	AB	AB	AB	AB	BB	BB	AA	AB	AB	BB	BB	AB	BB
384	ctg4663	ctg4663_150962	20	37.12	37.12	AB	AB	BB	BB	AB	BB	AB	BB	AB	AB	BB	AB	AB	AB	AA	AB	AB	AA	AB	AB	AB	AA	BB	AA	BB	BB	AB	BB	AB	AB	AB	AB	AB	AB	AB	BB	BB	AA	AB	AB	BB	BB	AB	BB
385	ctg4663	ctg4663_151799	20	36.449	36.449	AB	AB	BB	BB	AB	BB	AB	BB	AB	AB	BB	AB	AB	AB	AB	AB	AB	AA	AB	AB	AB	AA	BB	AA	BB	BB	AB	BB	AB	AB	AB	AB	AB	AB	AB	BB	BB	AA	AB	AB	BB	BB	AB	BB
386	ctg4663	ctg4663_151827	20	37.12	37.12	AB	AB	BB	BB	AB	BB	AB	BB	AB	AB	BB	AB	AB	AB	AA	AB	AB	AA	AB	AB	AB	AA	BB	AA	BB	BB	AB	BB	AB	AB	AB	AB	AB	AB	AB	BB	BB	AA	AB	AB	BB	BB	AB	BB
387	ctg4663	ctg4663_152598	20	37.12	37.12	AB	AB	BB	BB	AB	BB	AB	BB	AB	AB	BB	AB	AB	AB	AA	AB	AB	AA	AB	AB	AB	AA	BB	AA	BB	BB	AB	BB	AB	AB	AB	AB	AB	AB	AB	BB	BB	AA	AB	AB	BB	BB	AB	BB
388	ctg4663	ctg4663_168699	20	37.12	37.12	AB	AB	BB	BB	AB	BB	AB	BB	AB	AB	BB	AB	AB	AB	AA	AB	AB	AA	AB	AB	AB	AA	BB	AA	BB	BB	AB	BB	AB	AB	AB	AB	AB	AB	AB	BB	BB	AA	AB	AB	BB	BB	AB	BB
390	ctg4663	ctg4663_170604	20	36.449	36.449	AB	AB	BB	BB	AB	BB	AB	BB	AB	AB	BB	AB	AB	AB	AB	AB	AB	AA	AB	AB	AB	AA	BB	AA	BB	BB	AB	BB	AB	AB	AB	AB	AB	AB	AB	BB	BB	AA	AB	AB	BB	BB	AB	BB
391	ctg4663	ctg4663_170615	20	37.12	37.12	AB	AB	BB	BB	AB	BB	AB	BB	AB	AB	BB	AB	AB	AB	AA	AB	AB	AA	AB	AB	AB	AA	BB	AA	BB	BB	AB	BB	AB	AB	AB	AB	AB	AB	AB	BB	BB	AA	AB	AB	BB	BB	AB	BB
392	ctg4663	ctg4663_172110	20	37.12	37.12	AB	AB	BB	BB	AB	BB	AB	BB	AB	AB	BB	AB	AB	AB	AA	AB	AB	AA	AB	AB	AB	AA	BB	AA	BB	BB	AB	BB	AB	AB	AB	AB	AB	AB	AB	BB	BB	AA	AB	AB	BB	BB	AB	BB
393	ctg4663	ctg4663_173909	20	36.449	36.449	AB	AB	BB	BB	AB	BB	AB	BB	AB	AB	BB	AB	AB	AB	AB	AB	AB	AA	AB	AB	AB	AA	BB	AA	BB	BB	AB	BB	AB	AB	AB	AB	AB	AB	AB	BB	BB	AA	AB	AB	BB	BB	AB	BB
395	ctg4663	ctg4663_181865	20	37.12	37.12	AB	AB	BB	BB	AB	BB	AB	BB	AB	AB	BB	AB	AB	AB	AA	AB	AB	AA	AB	AB	AB	AA	BB	AA	BB	BB	AB	BB	AB	AB	AB	AB	AB	AB	AB	BB	BB	AA	AB	AB	BB	BB	AB	BB
396	ctg4663	ctg4663_181887	20	37.12	37.12	AB	AB	BB	BB	AB	BB	AB	BB	AB	AB	BB	AB	AB	AB	AA	AB	AB	AA	AB	AB	AB	AA	BB	AA	BB	BB	AB	BB	AB	AB	AB	AB	AB	AB	AB	BB	BB	AA	AB	AB	BB	BB	AB	BB
397	ctg4663	ctg4663_181888	20	37.12	37.12	AB	AB	BB	BB	AB	BB	AB	BB	AB	AB	BB	AB	AB	AB	AA	AB	AB	AA	AB	AB	AB	AA	BB	AA	BB	BB	AB	BB	AB	AB	AB	AB	AB	AB	AB	BB	BB	AA	AB	AB	BB	BB	AB	BB
398	ctg4660	ctg4660_74902	6	102.326	102.326	AB	AB	AB	AA	AB	AB	BB	AB	AA	AB	AB	AB	AA	AA	AB	AB	BB	AA	BB	BB	AB	AB	AB	AA	AA	AB	AB	AB	AB	BB	AA	AB	BB	AB	AB	BB	AB	BB	AA	AB	BB	AA	AB	BB
399	ctg4660	ctg4660_94042	6	102.326	102.326	AB	AB	AB	AA	AB	AB	BB	AB	AA	AB	AB	AB	AA	AA	AB	AB	BB	AA	BB	BB	AB	AB	AB	AA	AA	AB	AB	AB	AB	BB	AA	AB	BB	AB	AB	BB	AB	BB	AA	AB	BB	AA	AB	BB
400	ctg4660	ctg4660_94325	6	102.326	102.326	AB	AB	AB	AA	AB	AB	BB	AB	AA	AB	AB	AB	AA	AA	AB	AB	BB	AA	BB	BB	AB	AB	AB	AA	AA	AB	AB	AB	AB	BB	AA	AB	BB	AB	AB	BB	AB	BB	AA	AB	BB	AA	AB	BB
401	ctg4660	ctg4660_94545	6	102.326	102.326	AB	AB	AB	AA	AB	AB	BB	AB	AA	AB	AB	AB	AA	AA	AB	AB	BB	AA	BB	BB	AB	AB	AB	AA	AA	AB	AB	AB	AB	BB	AA	AB	BB	AB	AB	BB	AB	BB	AA	AB	BB	AA	AB	BB
402	ctg4660	ctg4660_96543	6	102.326	102.326	AB	AB	AB	AA	AB	AB	BB	AB	AA	AB	AB	AB	AA	AA	AB	AB	BB	AA	BB	BB	AB	AB	AB	AA	AA	AB	AB	AB	AB	BB	AA	AB	BB	AB	AB	BB	AB	BB	AA	AB	BB	AA	AB	BB
403	ctg4660	ctg4660_96652	6	102.998	102.998	AB	AB	AB	AA	AB	AB	BB	AB	AA	AB	AB	AB	AA	AA	AB	AB	BB	AA	BB	BB	AB	AB	AB	AA	AA	AB	AB	AB	AB	BB	AA	AB	BB	AB	AB	BB	AB	BB	AA	AB	BB	AA	AB	BB
404	ctg4660	ctg4660_101420	6	102.326	102.326	AB	AB	AB	AA	AB	AB	BB	AB	AA	AB	AB	AB	AA	AA	AB	AB	BB	AA	BB	BB	AB	AB	AB	AA	AA	AB	AB	AB	AB	BB	AA	AB	BB	AB	AB	BB	AB	BB	AA	AB	BB	AA	AB	BB
405	ctg4660	ctg4660_102631	6	102.998	102.998	AB	AB	AB	AA	AB	AB	BB	AB	AA	AB	AB	AB	AA	AA	AB	AB	BB	AA	BB	BB	AB	AB	AB	AA	AA	AB	AB	AB	AB	BB	AA	AB	BB	AB	AB	BB	AB	BB	AA	AB	BB	AA	AB	BB
406	ctg4660	ctg4660_102710	6	102.998	102.998	AB	AB	AB	AA	AB	AB	BB	AB	AA	AB	AB	AB	AA	AA	AB	AB	BB	AA	BB	BB	AB	AB	AB	AA	AA	AB	AB	AB	AB	BB	AA	AB	BB	AB	AB	BB	AB	BB	AA	AB	BB	AA	AB	BB
407	ctg4660	ctg4660_102787	6	102.326	102.326	AB	AB	AB	AA	AB	AB	BB	AB	AA	AB	AB	AB	AA	AA	AB	AB	BB	AA	BB	BB	AB	AB	AB	AA	AA	AB	AB	AB	AB	BB	AA	AB	BB	AB	AB	BB	AB	BB	AA	AB	BB	AA	AB	BB
408	ctg4660	ctg4660_105384	6	102.998	102.998	AB	AB	AB	AA	AB	AB	BB	AB	AA	AB	AB	AB	AA	AA	AB	AB	BB	AA	BB	BB	AB	AB	AB	AA	AA	AB	AB	AB	AB	BB	AA	AB	BB	AB	AB	BB	AB	BB	AA	AB	BB	AA	AB	BB
409	ctg4660	ctg4660_106286	6	103.669	103.669	AB	AB	AB	AA	AB	AB	BB	AB	AA	AB	AB	AB	AA	AA	AB	AB	BB	AA	BB	BB	AB	AB	AB	AA	AA	AB	AB	AB	AB	BB	AA	AB	BB	AB	AB	BB	AB	BB	AA	AB	BB	AA	AB	BB
410	ctg4660	ctg4660_111929	6	102.998	102.998	AB	AB	AB	AA	AB	AB	BB	AB	AA	AB	AB	AB	AA	AA	AB	AB	BB	AA	BB	BB	AB	AB	AB	AA	AA	AB	AB	AB	AB	BB	AA	AB	BB	AB	AB	BB	AB	BB	AA	AB	BB	AA	AB	BB
414	tig02173184	tig02173184_42687	1	95.965	95.965	AB	AB	AA	AB	BB	AB	BB	AB	BB	AB	AB	AB	AB	BB	AB	AA	AB	AB	BB	AA	AB	AB	AA	BB	BB	BB	AB	AB	AB	AA	BB	AB	AB	AB	BB	BB	AB	AB	BB	AB	AB	AB	BB	AB
415	tig02173184	tig02173184_43014	1	95.965	95.965	AB	AB	AA	AB	BB	AB	BB	AB	BB	AB	AB	AB	AB	BB	AB	AA	AB	AB	BB	AA	AB	AB	AA	BB	BB	BB	AB	AB	AB	AA	BB	AB	AB	AB	BB	BB	AB	AB	BB	AB	AB	AB	BB	AB
417	tig02173184	tig02173184_43130	1	95.965	95.965	AB	AB	AA	AB	BB	AB	BB	AB	BB	AB	AB	AB	AB	BB	AB	AA	AB	AB	BB	AA	AB	AB	AA	BB	BB	BB	AB	AB	AB	AA	BB	AB	AB	AB	BB	BB	AB	AB	BB	AB	AB	AB	BB	AB
420	tig02173184	tig02173184_43222	1	95.965	95.965	AB	AB	AA	AB	BB	AB	BB	AB	BB	AB	AB	AB	AB	BB	AB	AA	AB	AB	BB	AA	AB	AB	AA	BB	BB	BB	AB	AB	AB	AA	BB	AB	AB	AB	BB	BB	AB	AB	BB	AB	AB	AB	BB	AB
421	tig02173184	tig02173184_43363	1	95.965	95.965	AB	AB	AA	AB	BB	AB	BB	AB	BB	AB	AB	AB	AB	BB	AB	AA	AB	AB	BB	AA	AB	AB	AA	BB	BB	BB	AB	AB	AB	AA	BB	AB	AB	AB	BB	BB	AB	AB	BB	AB	AB	AB	BB	AB
423	tig02173184	tig02173184_43400	1	95.965	95.965	AB	AB	AA	AB	BB	AB	BB	AB	BB	AB	AB	AB	AB	BB	AB	AA	AB	AB	BB	AA	AB	AB	AA	BB	BB	BB	AB	AB	AB	AA	BB	AB	AB	AB	BB	BB	AB	AB	BB	AB	AB	AB	BB	AB
428	tig02173184	tig02173184_48350	1	95.965	95.965	AB	AB	AA	AB	BB	AB	BB	AB	BB	AB	AB	AB	AB	BB	AB	AA	AB	AB	BB	AA	AB	AB	AA	BB	BB	BB	AB	AB	AB	AA	BB	AB	AB	AB	BB	BB	AB	AB	BB	AB	AB	AB	BB	AB
430	tig02173184	tig02173184_48769	1	95.965	95.965	AB	AB	AA	AB	BB	AB	BB	AB	BB	AB	AB	AB	AB	BB	AB	AA	AB	AB	BB	AA	AB	AB	AA	BB	BB	BB	AB	AB	AB	AA	BB	AB	AB	AB	BB	BB	AB	AB	BB	AB	AB	AB	BB	AB
431	tig02173184	tig02173184_48913	1	95.965	95.965	AB	AB	AA	AB	BB	AB	BB	AB	BB	AB	AB	AB	AB	BB	AB	AA	AB	AB	BB	AA	AB	AB	AA	BB	BB	BB	AB	AB	AB	AA	BB	AB	AB	AB	BB	BB	AB	AB	BB	AB	AB	AB	BB	AB
433	tig02173184	tig02173184_49411	1	95.965	95.965	AB	AB	AA	AB	BB	AB	BB	AB	BB	AB	AB	AB	AB	BB	AB	AA	AB	AB	BB	AA	AB	AB	AA	BB	BB	BB	AB	AB	AB	AA	BB	AB	AB	AB	BB	BB	AB	AB	BB	AB	AB	AB	BB	AB
434	tig02173184	tig02173184_49431	1	95.965	95.965	AB	AB	AA	AB	BB	AB	BB	AB	BB	AB	AB	AB	AB	BB	AB	AA	AB	AB	BB	AA	AB	AB	AA	BB	BB	BB	AB	AB	AB	AA	BB	AB	AB	AB	BB	BB	AB	AB	BB	AB	AB	AB	BB	AB
435	tig02173184	tig02173184_49441	1	95.965	95.965	AB	AB	AA	AB	BB	AB	BB	AB	BB	AB	AB	AB	AB	BB	AB	AA	AB	AB	BB	AA	AB	AB	AA	BB	BB	BB	AB	AB	AB	AA	BB	AB	AB	AB	BB	BB	AB	AB	BB	AB	AB	AB	BB	AB
436	tig02173184	tig02173184_49472	1	95.965	95.965	AB	AB	AA	AB	BB	AB	BB	AB	BB	AB	AB	AB	AB	BB	AB	AA	AB	AB	BB	AA	AB	AB	AA	BB	BB	BB	AB	AB	AB	AA	BB	AB	AB	AB	BB	BB	AB	AB	BB	AB	AB	AB	BB	AB
442	tig02173184	tig02173184_54070	1	95.965	95.965	AB	AB	AA	AB	BB	AB	BB	AB	BB	AB	AB	AB	AB	BB	AB	AA	AB	AB	BB	AA	AB	AB	AA	BB	BB	BB	AB	AB	AB	AA	BB	AB	AB	AB	BB	BB	AB	AB	BB	AB	AB	AB	BB	AB
443	tig02173184	tig02173184_54153	1	95.965	95.965	AB	AB	AA	AB	BB	AB	BB	AB	BB	AB	AB	AB	AB	BB	AB	AA	AB	AB	BB	AA	AB	AB	AA	BB	BB	BB	AB	AB	AB	AA	BB	AB	AB	AB	BB	BB	AB	AB	BB	AB	AB	AB	BB	AB
445	tig02173184	tig02173184_54566	1	95.965	95.965	AB	AB	AA	AB	BB	AB	BB	AB	BB	AB	AB	AB	AB	BB	AB	AA	AB	AB	BB	AA	AB	AB	AA	BB	BB	BB	AB	AB	AB	AA	BB	AB	AB	AB	BB	BB	AB	AB	BB	AB	AB	AB	BB	AB
446	tig02173184	tig02173184_54760	1	95.965	95.965	AB	AB	AA	AB	BB	AB	BB	AB	BB	AB	AB	AB	AB	BB	AB	AA	AB	AB	BB	AA	AB	AB	AA	BB	BB	BB	AB	AB	AB	AA	BB	AB	AB	AB	BB	BB	AB	AB	BB	AB	AB	AB	BB	AB
448	tig02173184	tig02173184_57501	1	95.965	95.965	AB	AB	AA	AB	BB	AB	BB	AB	BB	AB	AB	AB	AB	BB	AB	AA	AB	AB	BB	AA	AB	AB	AA	BB	BB	BB	AB	AB	AB	AA	BB	AB	AB	AB	BB	BB	AB	AB	BB	AB	AB	AB	BB	AB
449	tig02173184	tig02173184_66783	1	95.965	95.965	AB	AB	AA	AB	BB	AB	BB	AB	BB	AB	AB	AB	AB	BB	AB	AA	AB	AB	BB	AA	AB	AB	AA	BB	BB	BB	AB	AB	AB	AA	BB	AB	AB	AB	BB	BB	AB	AB	BB	AB	AB	AB	BB	AB
452	tig02173184	tig02173184_67857	1	95.965	95.965	AB	AB	AA	AB	BB	AB	BB	AB	BB	AB	AB	AB	AB	BB	AB	AA	AB	AB	BB	AA	AB	AB	AA	BB	BB	BB	AB	AB	AB	AA	BB	AB	AB	AB	BB	BB	AB	AB	BB	AB	AB	AB	BB	AB
454	tig02173184	tig02173184_75064	1	95.965	95.965	AB	AB	AA	AB	BB	AB	BB	AB	BB	AB	AB	AB	AB	BB	AB	AA	AB	AB	BB	AA	AB	AB	AA	BB	BB	BB	AB	AB	AB	AA	BB	AB	AB	AB	BB	BB	AB	AB	BB	AB	AB	AB	BB	AB
455	tig02173184	tig02173184_78017	1	95.965	95.965	AB	AB	AA	AB	BB	AB	BB	AB	BB	AB	AB	AB	AB	BB	AB	AA	AB	AB	BB	AA	AB	AB	AA	BB	BB	BB	AB	AB	AB	AA	BB	AB	AB	AB	BB	BB	AB	AB	BB	AB	AB	AB	BB	AB
456	tig02173184	tig02173184_78257	1	95.965	95.965	AB	AB	AA	AB	BB	AB	BB	AB	BB	AB	AB	AB	AB	BB	AB	AA	AB	AB	BB	AA	AB	AB	AA	BB	BB	BB	AB	AB	AB	AA	BB	AB	AB	AB	BB	BB	AB	AB	BB	AB	AB	AB	BB	AB
457	tig02173184	tig02173184_90019	1	95.965	95.965	AB	AB	AA	AB	BB	AB	BB	AB	BB	AB	AB	AB	AB	BB	AB	AA	AB	AB	BB	AA	AB	AB	AA	BB	BB	BB	AB	AB	AB	AA	BB	AB	AB	AB	BB	BB	AB	AB	BB	AB	AB	AB	BB	AB
458	tig02173184	tig02173184_92834	1	95.965	95.965	AB	AB	AA	AB	BB	AB	BB	AB	BB	AB	AB	AB	AB	BB	AB	AA	AB	AB	BB	AA	AB	AB	AA	BB	BB	BB	AB	AB	AB	AA	BB	AB	AB	AB	BB	BB	AB	AB	BB	AB	AB	AB	BB	AB
459	tig02173184	tig02173184_95535	1	97.307	97.307	AB	AB	AA	AB	BB	AB	BB	AB	BB	AB	AB	AB	AB	BB	AB	AA	AB	AB	BB	AA	AB	AB	AB	BB	BB	BB	AB	AA	AB	AA	BB	AB	AB	AB	BB	BB	AB	AB	BB	AB	AB	AB	BB	AB
460	tig02173184	tig02173184_95714	1	95.965	95.965	AB	AB	AA	AB	BB	AB	BB	AB	BB	AB	AB	AB	AB	BB	AB	AA	AB	AB	BB	AA	AB	AB	AA	BB	BB	BB	AB	AB	AB	AA	BB	AB	AB	AB	BB	BB	AB	AB	BB	AB	AB	AB	BB	AB
461	tig02173184	tig02173184_95825	1	95.965	95.965	AB	AB	AA	AB	BB	AB	BB	AB	BB	AB	AB	AB	AB	BB	AB	AA	AB	AB	BB	AA	AB	AB	AA	BB	BB	BB	AB	AB	AB	AA	BB	AB	AB	AB	BB	BB	AB	AB	BB	AB	AB	AB	BB	AB
462	tig02173184	tig02173184_96542	1	95.965	95.965	AB	AB	AA	AB	BB	AB	BB	AB	BB	AB	AB	AB	AB	BB	AB	AA	AB	AB	BB	AA	AB	AB	AA	BB	BB	BB	AB	AB	AB	AA	BB	AB	AB	AB	BB	BB	AB	AB	BB	AB	AB	AB	BB	AB
463	tig02173184	tig02173184_96651	1	95.965	95.965	AB	AB	AA	AB	BB	AB	BB	AB	BB	AB	AB	AB	AB	BB	AB	AA	AB	AB	BB	AA	AB	AB	AA	BB	BB	BB	AB	AB	AB	AA	BB	AB	AB	AB	BB	BB	AB	AB	BB	AB	AB	AB	BB	AB
464	tig02173184	tig02173184_97292	1	97.978	97.978	AB	AB	AA	AB	BB	AB	BB	AB	BB	AB	AB	AB	AB	BB	AB	AA	AB	AB	BB	AA	AB	AB	AB	BB	BB	BB	AB	AA	AB	AA	BB	AB	AB	AB	BB	BB	AB	AB	AB	AB	AB	AB	BB	AB
465	tig02173184	tig02173184_97499	1	95.965	95.965	AB	AB	AA	AB	BB	AB	BB	AB	BB	AB	AB	AB	AB	BB	AB	AA	AB	AB	BB	AA	AB	AB	AA	BB	BB	BB	AB	AB	AB	AA	BB	AB	AB	AB	BB	BB	AB	AB	BB	AB	AB	AB	BB	AB
466	tig02173184	tig02173184_99686	1	97.307	97.307	AB	AB	AA	AB	BB	AB	BB	AB	BB	AB	AB	AB	AB	BB	AB	AA	AB	AB	BB	AA	AB	AB	AB	BB	BB	BB	AB	AA	AB	AA	BB	AB	AB	AB	BB	BB	AB	AB	BB	AB	AB	AB	BB	AB
467	tig02173184	tig02173184_100204	1	95.965	95.965	AB	AB	AA	AB	BB	AB	BB	AB	BB	AB	AB	AB	AB	BB	AB	AA	AB	AB	BB	AA	AB	AB	AA	BB	BB	BB	AB	AB	AB	AA	BB	AB	AB	AB	BB	BB	AB	AB	BB	AB	AB	AB	BB	AB
469	tig02173184	tig02173184_104965	1	95.965	95.965	AB	AB	AA	AB	BB	AB	BB	AB	BB	AB	AB	AB	AB	BB	AB	AA	AB	AB	BB	AA	AB	AB	AA	BB	BB	BB	AB	AB	AB	AA	BB	AB	AB	AB	BB	BB	AB	AB	BB	AB	AB	AB	BB	AB
470	tig02173184	tig02173184_105167	1	97.307	97.307	AB	AB	AA	AB	BB	AB	BB	AB	BB	AB	AB	AB	AB	BB	AB	AA	AB	AB	BB	AA	AB	AB	AB	BB	BB	BB	AB	AA	AB	AA	BB	AB	AB	AB	BB	BB	AB	AB	BB	AB	AB	AB	BB	AB
471	tig02173184	tig02173184_108442	1	95.965	95.965	AB	AB	AA	AB	BB	AB	BB	AB	BB	AB	AB	AB	AB	BB	AB	AA	AB	AB	BB	AA	AB	AB	AA	BB	BB	BB	AB	AB	AB	AA	BB	AB	AB	AB	BB	BB	AB	AB	BB	AB	AB	AB	BB	AB
472	tig02173184	tig02173184_108447	1	95.965	95.965	AB	AB	AA	AB	BB	AB	BB	AB	BB	AB	AB	AB	AB	BB	AB	AA	AB	AB	BB	AA	AB	AB	AA	BB	BB	BB	AB	AB	AB	AA	BB	AB	AB	AB	BB	BB	AB	AB	BB	AB	AB	AB	BB	AB
473	tig02173184	tig02173184_108453	1	95.965	95.965	AB	AB	AA	AB	BB	AB	BB	AB	BB	AB	AB	AB	AB	BB	AB	AA	AB	AB	BB	AA	AB	AB	AA	BB	BB	BB	AB	AB	AB	AA	BB	AB	AB	AB	BB	BB	AB	AB	BB	AB	AB	AB	BB	AB
474	tig02173184	tig02173184_108499	1	95.965	95.965	AB	AB	AA	AB	BB	AB	BB	AB	BB	AB	AB	AB	AB	BB	AB	AA	AB	AB	BB	AA	AB	AB	AA	BB	BB	BB	AB	AB	AB	AA	BB	AB	AB	AB	BB	BB	AB	AB	BB	AB	AB	AB	BB	AB
475	tig02173184	tig02173184_110109	1	95.965	95.965	AB	AB	AA	AB	BB	AB	BB	AB	BB	AB	AB	AB	AB	BB	AB	AA	AB	AB	BB	AA	AB	AB	AA	BB	BB	BB	AB	AB	AB	AA	BB	AB	AB	AB	BB	BB	AB	AB	BB	AB	AB	AB	BB	AB
476	tig02173184	tig02173184_112899	1	95.965	95.965	AB	AB	AA	AB	BB	AB	BB	AB	BB	AB	AB	AB	AB	BB	AB	AA	AB	AB	BB	AA	AB	AB	AA	BB	BB	BB	AB	AB	AB	AA	BB	AB	AB	AB	BB	BB	AB	AB	BB	AB	AB	AB	BB	AB
477	tig02173184	tig02173184_113033	1	96.636	96.636	AB	AB	AA	AB	BB	AB	BB	AB	BB	AB	AB	AB	AB	BB	AB	AA	AB	AB	BB	AA	AB	AB	AB	BB	BB	BB	AB	AB	AB	AA	BB	AB	AB	AB	BB	BB	AB	AB	BB	AB	AB	AB	BB	AB
478	tig02173184	tig02173184_118013	1	95.965	95.965	AB	AB	AA	AB	BB	AB	BB	AB	BB	AB	AB	AB	AB	BB	AB	AA	AB	AB	BB	AA	AB	AB	AA	BB	BB	BB	AB	AB	AB	AA	BB	AB	AB	AB	BB	BB	AB	AB	BB	AB	AB	AB	BB	AB
479	tig02173184	tig02173184_118151	1	95.965	95.965	AB	AB	AA	AB	BB	AB	BB	AB	BB	AB	AB	AB	AB	BB	AB	AA	AB	AB	BB	AA	AB	AB	AA	BB	BB	BB	AB	AB	AB	AA	BB	AB	AB	AB	BB	BB	AB	AB	BB	AB	AB	AB	BB	AB
480	tig02173184	tig02173184_118174	1	95.965	95.965	AB	AB	AA	AB	BB	AB	BB	AB	BB	AB	AB	AB	AB	BB	AB	AA	AB	AB	BB	AA	AB	AB	AA	BB	BB	BB	AB	AB	AB	AA	BB	AB	AB	AB	BB	BB	AB	AB	BB	AB	AB	AB	BB	AB
481	tig02173184	tig02173184_118423	1	95.965	95.965	AB	AB	AA	AB	BB	AB	BB	AB	BB	AB	AB	AB	AB	BB	AB	AA	AB	AB	BB	AA	AB	AB	AA	BB	BB	BB	AB	AB	AB	AA	BB	AB	AB	AB	BB	BB	AB	AB	BB	AB	AB	AB	BB	AB
482	tig02173184	tig02173184_118695	1	95.965	95.965	AB	AB	AA	AB	BB	AB	BB	AB	BB	AB	AB	AB	AB	BB	AB	AA	AB	AB	BB	AA	AB	AB	AA	BB	BB	BB	AB	AB	AB	AA	BB	AB	AB	AB	BB	BB	AB	AB	BB	AB	AB	AB	BB	AB
483	tig02173184	tig02173184_121339	1	95.965	95.965	AB	AB	AA	AB	BB	AB	BB	AB	BB	AB	AB	AB	AB	BB	AB	AA	AB	AB	BB	AA	AB	AB	AA	BB	BB	BB	AB	AB	AB	AA	BB	AB	AB	AB	BB	BB	AB	AB	BB	AB	AB	AB	BB	AB
484	tig02173184	tig02173184_126491	1	95.965	95.965	AB	AB	AA	AB	BB	AB	BB	AB	BB	AB	AB	AB	AB	BB	AB	AA	AB	AB	BB	AA	AB	AB	AA	BB	BB	BB	AB	AB	AB	AA	BB	AB	AB	AB	BB	BB	AB	AB	BB	AB	AB	AB	BB	AB
485	tig02173184	tig02173184_126801	1	95.965	95.965	AB	AB	AA	AB	BB	AB	BB	AB	BB	AB	AB	AB	AB	BB	AB	AA	AB	AB	BB	AA	AB	AB	AA	BB	BB	BB	AB	AB	AB	AA	BB	AB	AB	AB	BB	BB	AB	AB	BB	AB	AB	AB	BB	AB
486	tig02173184	tig02173184_127219	1	95.965	95.965	AB	AB	AA	AB	BB	AB	BB	AB	BB	AB	AB	AB	AB	BB	AB	AA	AB	AB	BB	AA	AB	AB	AA	BB	BB	BB	AB	AB	AB	AA	BB	AB	AB	AB	BB	BB	AB	AB	BB	AB	AB	AB	BB	AB
487	tig02173184	tig02173184_127773	1	95.965	95.965	AB	AB	AA	AB	BB	AB	BB	AB	BB	AB	AB	AB	AB	BB	AB	AA	AB	AB	BB	AA	AB	AB	AA	BB	BB	BB	AB	AB	AB	AA	BB	AB	AB	AB	BB	BB	AB	AB	BB	AB	AB	AB	BB	AB
488	tig02173184	tig02173184_127880	1	95.965	95.965	AB	AB	AA	AB	BB	AB	BB	AB	BB	AB	AB	AB	AB	BB	AB	AA	AB	AB	BB	AA	AB	AB	AA	BB	BB	BB	AB	AB	AB	AA	BB	AB	AB	AB	BB	BB	AB	AB	BB	AB	AB	AB	BB	AB
489	tig02173184	tig02173184_127966	1	95.965	95.965	AB	AB	AA	AB	BB	AB	BB	AB	BB	AB	AB	AB	AB	BB	AB	AA	AB	AB	BB	AA	AB	AB	AA	BB	BB	BB	AB	AB	AB	AA	BB	AB	AB	AB	BB	BB	AB	AB	BB	AB	AB	AB	BB	AB
490	tig02173184	tig02173184_128217	1	95.965	95.965	AB	AB	AA	AB	BB	AB	BB	AB	BB	AB	AB	AB	AB	BB	AB	AA	AB	AB	BB	AA	AB	AB	AA	BB	BB	BB	AB	AB	AB	AA	BB	AB	AB	AB	BB	BB	AB	AB	BB	AB	AB	AB	BB	AB
491	tig02173184	tig02173184_128356	1	95.965	95.965	AB	AB	AA	AB	BB	AB	BB	AB	BB	AB	AB	AB	AB	BB	AB	AA	AB	AB	BB	AA	AB	AB	AA	BB	BB	BB	AB	AB	AB	AA	BB	AB	AB	AB	BB	BB	AB	AB	BB	AB	AB	AB	BB	AB
492	tig02173184	tig02173184_128391	1	95.965	95.965	AB	AB	AA	AB	BB	AB	BB	AB	BB	AB	AB	AB	AB	BB	AB	AA	AB	AB	BB	AA	AB	AB	AA	BB	BB	BB	AB	AB	AB	AA	BB	AB	AB	AB	BB	BB	AB	AB	BB	AB	AB	AB	BB	AB
493	tig02173184	tig02173184_128505	1	95.965	95.965	AB	AB	AA	AB	BB	AB	BB	AB	BB	AB	AB	AB	AB	BB	AB	AA	AB	AB	BB	AA	AB	AB	AA	BB	BB	BB	AB	AB	AB	AA	BB	AB	AB	AB	BB	BB	AB	AB	BB	AB	AB	AB	BB	AB
494	tig02173184	tig02173184_128511	1	95.965	95.965	AB	AB	AA	AB	BB	AB	BB	AB	BB	AB	AB	AB	AB	BB	AB	AA	AB	AB	BB	AA	AB	AB	AA	BB	BB	BB	AB	AB	AB	AA	BB	AB	AB	AB	BB	BB	AB	AB	BB	AB	AB	AB	BB	AB
495	tig02173184	tig02173184_128551	1	95.965	95.965	AB	AB	AA	AB	BB	AB	BB	AB	BB	AB	AB	AB	AB	BB	AB	AA	AB	AB	BB	AA	AB	AB	AA	BB	BB	BB	AB	AB	AB	AA	BB	AB	AB	AB	BB	BB	AB	AB	BB	AB	AB	AB	BB	AB
496	tig02173184	tig02173184_128578	1	95.965	95.965	AB	AB	AA	AB	BB	AB	BB	AB	BB	AB	AB	AB	AB	BB	AB	AA	AB	AB	BB	AA	AB	AB	AA	BB	BB	BB	AB	AB	AB	AA	BB	AB	AB	AB	BB	BB	AB	AB	BB	AB	AB	AB	BB	AB
497	tig02173184	tig02173184_128763	1	95.965	95.965	AB	AB	AA	AB	BB	AB	BB	AB	BB	AB	AB	AB	AB	BB	AB	AA	AB	AB	BB	AA	AB	AB	AA	BB	BB	BB	AB	AB	AB	AA	BB	AB	AB	AB	BB	BB	AB	AB	BB	AB	AB	AB	BB	AB
498	tig02173184	tig02173184_130600	1	96.636	96.636	AB	AB	AA	AB	BB	AB	BB	AB	BB	AB	AB	AB	AB	BB	AB	AA	AB	AB	BB	AA	AB	AB	AB	BB	BB	BB	AB	AB	AB	AA	BB	AB	AB	AB	BB	BB	AB	AB	BB	AB	AB	AB	BB	AB
499	tig02173184	tig02173184_132308	1	95.965	95.965	AB	AB	AA	AB	BB	AB	BB	AB	BB	AB	AB	AB	AB	BB	AB	AA	AB	AB	BB	AA	AB	AB	AA	BB	BB	BB	AB	AB	AB	AA	BB	AB	AB	AB	BB	BB	AB	AB	BB	AB	AB	AB	BB	AB
500	tig02173184	tig02173184_132331	1	95.965	95.965	AB	AB	AA	AB	BB	AB	BB	AB	BB	AB	AB	AB	AB	BB	AB	AA	AB	AB	BB	AA	AB	AB	AA	BB	BB	BB	AB	AB	AB	AA	BB	AB	AB	AB	BB	BB	AB	AB	BB	AB	AB	AB	BB	AB
501	tig02173184	tig02173184_132367	1	95.965	95.965	AB	AB	AA	AB	BB	AB	BB	AB	BB	AB	AB	AB	AB	BB	AB	AA	AB	AB	BB	AA	AB	AB	AA	BB	BB	BB	AB	AB	AB	AA	BB	AB	AB	AB	BB	BB	AB	AB	BB	AB	AB	AB	BB	AB
502	tig02173184	tig02173184_132370	1	95.965	95.965	AB	AB	AA	AB	BB	AB	BB	AB	BB	AB	AB	AB	AB	BB	AB	AA	AB	AB	BB	AA	AB	AB	AA	BB	BB	BB	AB	AB	AB	AA	BB	AB	AB	AB	BB	BB	AB	AB	BB	AB	AB	AB	BB	AB
503	tig02173184	tig02173184_132376	1	95.965	95.965	AB	AB	AA	AB	BB	AB	BB	AB	BB	AB	AB	AB	AB	BB	AB	AA	AB	AB	BB	AA	AB	AB	AA	BB	BB	BB	AB	AB	AB	AA	BB	AB	AB	AB	BB	BB	AB	AB	BB	AB	AB	AB	BB	AB
504	tig02173184	tig02173184_132513	1	95.965	95.965	AB	AB	AA	AB	BB	AB	BB	AB	BB	AB	AB	AB	AB	BB	AB	AA	AB	AB	BB	AA	AB	AB	AA	BB	BB	BB	AB	AB	AB	AA	BB	AB	AB	AB	BB	BB	AB	AB	BB	AB	AB	AB	BB	AB
505	tig02173184	tig02173184_132521	1	95.965	95.965	AB	AB	AA	AB	BB	AB	BB	AB	BB	AB	AB	AB	AB	BB	AB	AA	AB	AB	BB	AA	AB	AB	AA	BB	BB	BB	AB	AB	AB	AA	BB	AB	AB	AB	BB	BB	AB	AB	BB	AB	AB	AB	BB	AB
506	tig02173184	tig02173184_132536	1	95.965	95.965	AB	AB	AA	AB	BB	AB	BB	AB	BB	AB	AB	AB	AB	BB	AB	AA	AB	AB	BB	AA	AB	AB	AA	BB	BB	BB	AB	AB	AB	AA	BB	AB	AB	AB	BB	BB	AB	AB	BB	AB	AB	AB	BB	AB
507	tig02173184	tig02173184_132572	1	95.965	95.965	AB	AB	AA	AB	BB	AB	BB	AB	BB	AB	AB	AB	AB	BB	AB	AA	AB	AB	BB	AA	AB	AB	AA	BB	BB	BB	AB	AB	AB	AA	BB	AB	AB	AB	BB	BB	AB	AB	BB	AB	AB	AB	BB	AB
508	tig02173184	tig02173184_132600	1	97.307	97.307	AB	AB	AA	AB	BB	AB	BB	AB	BB	AB	AB	AB	AB	BB	AB	AA	AB	AB	BB	AA	AB	AB	AB	BB	BB	BB	AB	AA	AB	AA	BB	AB	AB	AB	BB	BB	AB	AB	BB	AB	AB	AB	BB	AB
509	tig02173184	tig02173184_132660	1	95.965	95.965	AB	AB	AA	AB	BB	AB	BB	AB	BB	AB	AB	AB	AB	BB	AB	AA	AB	AB	BB	AA	AB	AB	AA	BB	BB	BB	AB	AB	AB	AA	BB	AB	AB	AB	BB	BB	AB	AB	BB	AB	AB	AB	BB	AB
510	tig02173184	tig02173184_133174	1	95.965	95.965	AB	AB	AA	AB	BB	AB	BB	AB	BB	AB	AB	AB	AB	BB	AB	AA	AB	AB	BB	AA	AB	AB	AA	BB	BB	BB	AB	AB	AB	AA	BB	AB	AB	AB	BB	BB	AB	AB	BB	AB	AB	AB	BB	AB
511	tig02173184	tig02173184_133298	1	95.965	95.965	AB	AB	AA	AB	BB	AB	BB	AB	BB	AB	AB	AB	AB	BB	AB	AA	AB	AB	BB	AA	AB	AB	AA	BB	BB	BB	AB	AB	AB	AA	BB	AB	AB	AB	BB	BB	AB	AB	BB	AB	AB	AB	BB	AB
512	tig02173184	tig02173184_133369	1	96.636	96.636	AB	AB	AA	AB	BB	AB	BB	AB	BB	AB	AB	AB	AB	BB	AB	AA	AB	AB	BB	AA	AB	AB	AB	BB	BB	BB	AB	AB	AB	AA	BB	AB	AB	AB	BB	BB	AB	AB	BB	AB	AB	AB	BB	AB
513	tig02173184	tig02173184_133443	1	95.965	95.965	AB	AB	AA	AB	BB	AB	BB	AB	BB	AB	AB	AB	AB	BB	AB	AA	AB	AB	BB	AA	AB	AB	AA	BB	BB	BB	AB	AB	AB	AA	BB	AB	AB	AB	BB	BB	AB	AB	BB	AB	AB	AB	BB	AB
514	tig02173184	tig02173184_133695	1	95.965	95.965	AB	AB	AA	AB	BB	AB	BB	AB	BB	AB	AB	AB	AB	BB	AB	AA	AB	AB	BB	AA	AB	AB	AA	BB	BB	BB	AB	AB	AB	AA	BB	AB	AB	AB	BB	BB	AB	AB	BB	AB	AB	AB	BB	AB
515	tig02173184	tig02173184_133715	1	95.965	95.965	AB	AB	AA	AB	BB	AB	BB	AB	BB	AB	AB	AB	AB	BB	AB	AA	AB	AB	BB	AA	AB	AB	AA	BB	BB	BB	AB	AB	AB	AA	BB	AB	AB	AB	BB	BB	AB	AB	BB	AB	AB	AB	BB	AB
516	tig02173184	tig02173184_133733	1	95.965	95.965	AB	AB	AA	AB	BB	AB	BB	AB	BB	AB	AB	AB	AB	BB	AB	AA	AB	AB	BB	AA	AB	AB	AA	BB	BB	BB	AB	AB	AB	AA	BB	AB	AB	AB	BB	BB	AB	AB	BB	AB	AB	AB	BB	AB
517	tig02173184	tig02173184_133768	1	95.965	95.965	AB	AB	AA	AB	BB	AB	BB	AB	BB	AB	AB	AB	AB	BB	AB	AA	AB	AB	BB	AA	AB	AB	AA	BB	BB	BB	AB	AB	AB	AA	BB	AB	AB	AB	BB	BB	AB	AB	BB	AB	AB	AB	BB	AB
518	tig02173184	tig02173184_133841	1	95.965	95.965	AB	AB	AA	AB	BB	AB	BB	AB	BB	AB	AB	AB	AB	BB	AB	AA	AB	AB	BB	AA	AB	AB	AA	BB	BB	BB	AB	AB	AB	AA	BB	AB	AB	AB	BB	BB	AB	AB	BB	AB	AB	AB	BB	AB
519	tig02173184	tig02173184_134078	1	95.965	95.965	AB	AB	AA	AB	BB	AB	BB	AB	BB	AB	AB	AB	AB	BB	AB	AA	AB	AB	BB	AA	AB	AB	AA	BB	BB	BB	AB	AB	AB	AA	BB	AB	AB	AB	BB	BB	AB	AB	BB	AB	AB	AB	BB	AB
520	tig02173184	tig02173184_134119	1	95.965	95.965	AB	AB	AA	AB	BB	AB	BB	AB	BB	AB	AB	AB	AB	BB	AB	AA	AB	AB	BB	AA	AB	AB	AA	BB	BB	BB	AB	AB	AB	AA	BB	AB	AB	AB	BB	BB	AB	AB	BB	AB	AB	AB	BB	AB
521	tig02173184	tig02173184_145364	1	95.965	95.965	AB	AB	AA	AB	BB	AB	BB	AB	BB	AB	AB	AB	AB	BB	AB	AA	AB	AB	BB	AA	AB	AB	AA	BB	BB	BB	AB	AB	AB	AA	BB	AB	AB	AB	BB	BB	AB	AB	BB	AB	AB	AB	BB	AB
522	tig02173184	tig02173184_145462	1	95.965	95.965	AB	AB	AA	AB	BB	AB	BB	AB	BB	AB	AB	AB	AB	BB	AB	AA	AB	AB	BB	AA	AB	AB	AA	BB	BB	BB	AB	AB	AB	AA	BB	AB	AB	AB	BB	BB	AB	AB	BB	AB	AB	AB	BB	AB
523	tig02173184	tig02173184_145465	1	95.965	95.965	AB	AB	AA	AB	BB	AB	BB	AB	BB	AB	AB	AB	AB	BB	AB	AA	AB	AB	BB	AA	AB	AB	AA	BB	BB	BB	AB	AB	AB	AA	BB	AB	AB	AB	BB	BB	AB	AB	BB	AB	AB	AB	BB	AB
524	tig02173184	tig02173184_145494	1	95.965	95.965	AB	AB	AA	AB	BB	AB	BB	AB	BB	AB	AB	AB	AB	BB	AB	AA	AB	AB	BB	AA	AB	AB	AA	BB	BB	BB	AB	AB	AB	AA	BB	AB	AB	AB	BB	BB	AB	AB	BB	AB	AB	AB	BB	AB
525	tig02173184	tig02173184_145511	1	95.965	95.965	AB	AB	AA	AB	BB	AB	BB	AB	BB	AB	AB	AB	AB	BB	AB	AA	AB	AB	BB	AA	AB	AB	AA	BB	BB	BB	AB	AB	AB	AA	BB	AB	AB	AB	BB	BB	AB	AB	BB	AB	AB	AB	BB	AB
526	tig02173184	tig02173184_148092	1	95.965	95.965	AB	AB	AA	AB	BB	AB	BB	AB	BB	AB	AB	AB	AB	BB	AB	AA	AB	AB	BB	AA	AB	AB	AA	BB	BB	BB	AB	AB	AB	AA	BB	AB	AB	AB	BB	BB	AB	AB	BB	AB	AB	AB	BB	AB
527	tig02173184	tig02173184_148223	1	95.965	95.965	AB	AB	AA	AB	BB	AB	BB	AB	BB	AB	AB	AB	AB	BB	AB	AA	AB	AB	BB	AA	AB	AB	AA	BB	BB	BB	AB	AB	AB	AA	BB	AB	AB	AB	BB	BB	AB	AB	BB	AB	AB	AB	BB	AB
528	tig02173184	tig02173184_148239	1	95.965	95.965	AB	AB	AA	AB	BB	AB	BB	AB	BB	AB	AB	AB	AB	BB	AB	AA	AB	AB	BB	AA	AB	AB	AA	BB	BB	BB	AB	AB	AB	AA	BB	AB	AB	AB	BB	BB	AB	AB	BB	AB	AB	AB	BB	AB
529	tig02173184	tig02173184_148253	1	95.965	95.965	AB	AB	AA	AB	BB	AB	BB	AB	BB	AB	AB	AB	AB	BB	AB	AA	AB	AB	BB	AA	AB	AB	AA	BB	BB	BB	AB	AB	AB	AA	BB	AB	AB	AB	BB	BB	AB	AB	BB	AB	AB	AB	BB	AB
530	tig02173184	tig02173184_148292	1	95.965	95.965	AB	AB	AA	AB	BB	AB	BB	AB	BB	AB	AB	AB	AB	BB	AB	AA	AB	AB	BB	AA	AB	AB	AA	BB	BB	BB	AB	AB	AB	AA	BB	AB	AB	AB	BB	BB	AB	AB	BB	AB	AB	AB	BB	AB
531	tig02173184	tig02173184_148331	1	95.965	95.965	AB	AB	AA	AB	BB	AB	BB	AB	BB	AB	AB	AB	AB	BB	AB	AA	AB	AB	BB	AA	AB	AB	AA	BB	BB	BB	AB	AB	AB	AA	BB	AB	AB	AB	BB	BB	AB	AB	BB	AB	AB	AB	BB	AB
532	tig02173184	tig02173184_148346	1	95.965	95.965	AB	AB	AA	AB	BB	AB	BB	AB	BB	AB	AB	AB	AB	BB	AB	AA	AB	AB	BB	AA	AB	AB	AA	BB	BB	BB	AB	AB	AB	AA	BB	AB	AB	AB	BB	BB	AB	AB	BB	AB	AB	AB	BB	AB
533	tig02173184	tig02173184_154891	1	95.965	95.965	AB	AB	AA	AB	BB	AB	BB	AB	BB	AB	AB	AB	AB	BB	AB	AA	AB	AB	BB	AA	AB	AB	AA	BB	BB	BB	AB	AB	AB	AA	BB	AB	AB	AB	BB	BB	AB	AB	BB	AB	AB	AB	BB	AB
534	tig02173184	tig02173184_159336	1	95.965	95.965	AB	AB	AA	AB	BB	AB	BB	AB	BB	AB	AB	AB	AB	BB	AB	AA	AB	AB	BB	AA	AB	AB	AA	BB	BB	BB	AB	AB	AB	AA	BB	AB	AB	AB	BB	BB	AB	AB	BB	AB	AB	AB	BB	AB
535	tig02173184	tig02173184_178965	1	95.965	95.965	AB	AB	AA	AB	BB	AB	BB	AB	BB	AB	AB	AB	AB	BB	AB	AA	AB	AB	BB	AA	AB	AB	AA	BB	BB	BB	AB	AB	AB	AA	BB	AB	AB	AB	BB	BB	AB	AB	BB	AB	AB	AB	BB	AB
536	tig02173184	tig02173184_178992	1	95.965	95.965	AB	AB	AA	AB	BB	AB	BB	AB	BB	AB	AB	AB	AB	BB	AB	AA	AB	AB	BB	AA	AB	AB	AA	BB	BB	BB	AB	AB	AB	AA	BB	AB	AB	AB	BB	BB	AB	AB	BB	AB	AB	AB	BB	AB
537	tig02173184	tig02173184_184289	1	95.965	95.965	AB	AB	AA	AB	BB	AB	BB	AB	BB	AB	AB	AB	AB	BB	AB	AA	AB	AB	BB	AA	AB	AB	AA	BB	BB	BB	AB	AB	AB	AA	BB	AB	AB	AB	BB	BB	AB	AB	BB	AB	AB	AB	BB	AB
538	tig02173184	tig02173184_184311	1	95.965	95.965	AB	AB	AA	AB	BB	AB	BB	AB	BB	AB	AB	AB	AB	BB	AB	AA	AB	AB	BB	AA	AB	AB	AA	BB	BB	BB	AB	AB	AB	AA	BB	AB	AB	AB	BB	BB	AB	AB	BB	AB	AB	AB	BB	AB
539	tig02173184	tig02173184_184336	1	95.965	95.965	AB	AB	AA	AB	BB	AB	BB	AB	BB	AB	AB	AB	AB	BB	AB	AA	AB	AB	BB	AA	AB	AB	AA	BB	BB	BB	AB	AB	AB	AA	BB	AB	AB	AB	BB	BB	AB	AB	BB	AB	AB	AB	BB	AB
540	tig02173184	tig02173184_184400	1	95.965	95.965	AB	AB	AA	AB	BB	AB	BB	AB	BB	AB	AB	AB	AB	BB	AB	AA	AB	AB	BB	AA	AB	AB	AA	BB	BB	BB	AB	AB	AB	AA	BB	AB	AB	AB	BB	BB	AB	AB	BB	AB	AB	AB	BB	AB
541	tig02173184	tig02173184_184459	1	95.965	95.965	AB	AB	AA	AB	BB	AB	BB	AB	BB	AB	AB	AB	AB	BB	AB	AA	AB	AB	BB	AA	AB	AB	AA	BB	BB	BB	AB	AB	AB	AA	BB	AB	AB	AB	BB	BB	AB	AB	BB	AB	AB	AB	BB	AB
542	tig02173184	tig02173184_184474	1	95.965	95.965	AB	AB	AA	AB	BB	AB	BB	AB	BB	AB	AB	AB	AB	BB	AB	AA	AB	AB	BB	AA	AB	AB	AA	BB	BB	BB	AB	AB	AB	AA	BB	AB	AB	AB	BB	BB	AB	AB	BB	AB	AB	AB	BB	AB
543	tig02173184	tig02173184_184501	1	95.965	95.965	AB	AB	AA	AB	BB	AB	BB	AB	BB	AB	AB	AB	AB	BB	AB	AA	AB	AB	BB	AA	AB	AB	AA	BB	BB	BB	AB	AB	AB	AA	BB	AB	AB	AB	BB	BB	AB	AB	BB	AB	AB	AB	BB	AB
544	tig02173184	tig02173184_184862	1	95.965	95.965	AB	AB	AA	AB	BB	AB	BB	AB	BB	AB	AB	AB	AB	BB	AB	AA	AB	AB	BB	AA	AB	AB	AA	BB	BB	BB	AB	AB	AB	AA	BB	AB	AB	AB	BB	BB	AB	AB	BB	AB	AB	AB	BB	AB
545	tig02173184	tig02173184_185056	1	95.965	95.965	AB	AB	AA	AB	BB	AB	BB	AB	BB	AB	AB	AB	AB	BB	AB	AA	AB	AB	BB	AA	AB	AB	AA	BB	BB	BB	AB	AB	AB	AA	BB	AB	AB	AB	BB	BB	AB	AB	BB	AB	AB	AB	BB	AB
546	tig02173184	tig02173184_185114	1	95.965	95.965	AB	AB	AA	AB	BB	AB	BB	AB	BB	AB	AB	AB	AB	BB	AB	AA	AB	AB	BB	AA	AB	AB	AA	BB	BB	BB	AB	AB	AB	AA	BB	AB	AB	AB	BB	BB	AB	AB	BB	AB	AB	AB	BB	AB
547	tig02173184	tig02173184_185254	1	95.965	95.965	AB	AB	AA	AB	BB	AB	BB	AB	BB	AB	AB	AB	AB	BB	AB	AA	AB	AB	BB	AA	AB	AB	AA	BB	BB	BB	AB	AB	AB	AA	BB	AB	AB	AB	BB	BB	AB	AB	BB	AB	AB	AB	BB	AB
548	tig02173184	tig02173184_185428	1	95.965	95.965	AB	AB	AA	AB	BB	AB	BB	AB	BB	AB	AB	AB	AB	BB	AB	AA	AB	AB	BB	AA	AB	AB	AA	BB	BB	BB	AB	AB	AB	AA	BB	AB	AB	AB	BB	BB	AB	AB	BB	AB	AB	AB	BB	AB
549	tig02173184	tig02173184_185491	1	95.965	95.965	AB	AB	AA	AB	BB	AB	BB	AB	BB	AB	AB	AB	AB	BB	AB	AA	AB	AB	BB	AA	AB	AB	AA	BB	BB	BB	AB	AB	AB	AA	BB	AB	AB	AB	BB	BB	AB	AB	BB	AB	AB	AB	BB	AB
550	tig02173184	tig02173184_185510	1	95.965	95.965	AB	AB	AA	AB	BB	AB	BB	AB	BB	AB	AB	AB	AB	BB	AB	AA	AB	AB	BB	AA	AB	AB	AA	BB	BB	BB	AB	AB	AB	AA	BB	AB	AB	AB	BB	BB	AB	AB	BB	AB	AB	AB	BB	AB
551	tig02173184	tig02173184_186295	1	95.965	95.965	AB	AB	AA	AB	BB	AB	BB	AB	BB	AB	AB	AB	AB	BB	AB	AA	AB	AB	BB	AA	AB	AB	AA	BB	BB	BB	AB	AB	AB	AA	BB	AB	AB	AB	BB	BB	AB	AB	BB	AB	AB	AB	BB	AB
552	tig02173184	tig02173184_189404	1	95.965	95.965	AB	AB	AA	AB	BB	AB	BB	AB	BB	AB	AB	AB	AB	BB	AB	AA	AB	AB	BB	AA	AB	AB	AA	BB	BB	BB	AB	AB	AB	AA	BB	AB	AB	AB	BB	BB	AB	AB	BB	AB	AB	AB	BB	AB
553	tig02173184	tig02173184_189420	1	95.965	95.965	AB	AB	AA	AB	BB	AB	BB	AB	BB	AB	AB	AB	AB	BB	AB	AA	AB	AB	BB	AA	AB	AB	AA	BB	BB	BB	AB	AB	AB	AA	BB	AB	AB	AB	BB	BB	AB	AB	BB	AB	AB	AB	BB	AB
554	tig02173184	tig02173184_221118	1	95.965	95.965	AB	AB	AA	AB	BB	AB	BB	AB	BB	AB	AB	AB	AB	BB	AB	AA	AB	AB	BB	AA	AB	AB	AA	BB	BB	BB	AB	AB	AB	AA	BB	AB	AB	AB	BB	BB	AB	AB	BB	AB	AB	AB	BB	AB
556	tig02173184	tig02173184_251016	1	95.965	95.965	AB	AB	AA	AB	BB	AB	BB	AB	BB	AB	AB	AB	AB	BB	AB	AA	AB	AB	BB	AA	AB	AB	AA	BB	BB	BB	AB	AB	AB	AA	BB	AB	AB	AB	BB	BB	AB	AB	BB	AB	AB	AB	BB	AB
557	ctg33405	ctg33405_1486	1	42.898	42.898	AB	AB	AB	AA	AA	AB	BB	AB	BB	AB	AA	AB	AB	AB	AB	AB	BB	BB	BB	AB	AA	BB	AB	BB	BB	BB	AB	AB	AA	AB	AB	BB	AA	BB	BB	AB	AA	AB	BB	AB	AB	AB	BB	BB
558	ctg33405	ctg33405_19188	1	42.227	42.227	AB	AB	AB	AA	AA	AB	BB	AB	BB	AB	AA	AB	AB	AB	AB	AB	BB	BB	BB	AB	AA	BB	AB	BB	BB	BB	AB	AB	AA	AB	AB	BB	AA	BB	BB	AB	AA	AB	BB	AB	AB	AB	BB	BB
559	ctg33405	ctg33405_19196	1	42.898	42.898	AB	AB	AB	AA	AA	AB	BB	AB	BB	AB	AA	AB	AB	AB	AB	AB	BB	BB	BB	AB	AA	BB	AB	BB	BB	BB	AB	AB	AA	AB	AB	BB	AA	BB	BB	AB	AA	AB	BB	AB	AB	AB	BB	BB
561	ctg33405	ctg33405_19405	1	42.227	42.227	AB	AB	AB	AA	AA	AB	BB	AB	BB	AB	AA	AB	AB	AB	AB	AB	BB	BB	BB	AB	AA	BB	AB	BB	BB	BB	AB	AB	AA	AB	AB	BB	AA	BB	BB	AB	AA	AB	BB	AB	AB	AB	BB	BB
562	ctg33405	ctg33405_19647	1	42.227	42.227	AB	AB	AB	AA	AA	AB	BB	AB	BB	AB	AA	AB	AB	AB	AB	AB	BB	BB	BB	AB	AA	BB	AB	BB	BB	BB	AB	AB	AA	AB	AB	BB	AA	BB	BB	AB	AA	AB	BB	AB	AB	AB	BB	BB
564	ctg8748	ctg8748_27968	6	59.345	59.345	AB	AB	AB	BB	AB	AB	BB	AB	BB	BB	AA	AB	BB	AB	AB	AB	AB	AB	BB	AB	BB	AA	BB	AA	AB	BB	AB	BB	AB	AA	AB	BB	AB	BB	AA	AB	AB	BB	AB	BB	BB	AA	AB	BB
565	ctg8748	ctg8748_30472	6	59.345	59.345	AB	AB	AB	BB	AB	AB	BB	AB	BB	BB	AA	AB	BB	AB	AB	AB	AB	AB	BB	AB	BB	AA	BB	AA	AB	BB	AB	BB	AB	AA	AB	BB	AB	BB	AA	AB	AB	BB	AB	BB	BB	AA	AB	BB
568	ctg8748	ctg8748_30985	6	59.345	59.345	AB	AB	AB	BB	AB	AB	BB	AB	BB	BB	AA	AB	BB	AB	AB	AB	AB	AB	BB	AB	BB	AA	BB	AA	AB	BB	AB	BB	AB	AA	AB	BB	AB	BB	AA	AB	AB	BB	AB	BB	BB	AA	AB	BB
569	ctg8748	ctg8748_30991	6	59.345	59.345	AB	AB	AB	BB	AB	AB	BB	AB	BB	BB	AA	AB	BB	AB	AB	AB	AB	AB	BB	AB	BB	AA	BB	AA	AB	BB	AB	BB	AB	AA	AB	BB	AB	BB	AA	AB	AB	BB	AB	BB	BB	AA	AB	BB
570	ctg8748	ctg8748_30992	6	59.345	59.345	AB	AB	AB	BB	AB	AB	BB	AB	BB	BB	AA	AB	BB	AB	AB	AB	AB	AB	BB	AB	BB	AA	BB	AA	AB	BB	AB	BB	AB	AA	AB	BB	AB	BB	AA	AB	AB	BB	AB	BB	BB	AA	AB	BB
573	ctg8748	ctg8748_34102	6	60.017	60.017	AB	AB	AB	AB	AB	AB	BB	AB	BB	BB	AA	AB	BB	AB	AB	AB	AB	AB	BB	AB	BB	AA	BB	AA	AB	BB	AB	BB	AB	AA	AB	BB	AB	BB	AA	AB	AB	BB	AB	BB	BB	AA	AB	BB
574	ctg8748	ctg8748_34264	6	60.017	60.017	AB	AB	AB	AB	AB	AB	BB	AB	BB	BB	AA	AB	BB	AB	AB	AB	AB	AB	BB	AB	BB	AA	BB	AA	AB	BB	AB	BB	AB	AA	AB	BB	AB	BB	AA	AB	AB	BB	AB	BB	BB	AA	AB	BB
575	ctg8748	ctg8748_34317	6	59.345	59.345	AB	AB	AB	BB	AB	AB	BB	AB	BB	BB	AA	AB	BB	AB	AB	AB	AB	AB	BB	AB	BB	AA	BB	AA	AB	BB	AB	BB	AB	AA	AB	BB	AB	BB	AA	AB	AB	BB	AB	BB	BB	AA	AB	BB
576	ctg8748	ctg8748_35167	6	59.345	59.345	AB	AB	AB	BB	AB	AB	BB	AB	BB	BB	AA	AB	BB	AB	AB	AB	AB	AB	BB	AB	BB	AA	BB	AA	AB	BB	AB	BB	AB	AA	AB	BB	AB	BB	AA	AB	AB	BB	AB	BB	BB	AA	AB	BB
577	ctg8748	ctg8748_35336	6	60.017	60.017	AB	AB	AB	AB	AB	AB	BB	AB	BB	BB	AA	AB	BB	AB	AB	AB	AB	AB	BB	AB	BB	AA	BB	AA	AB	BB	AB	BB	AB	AA	AB	BB	AB	BB	AA	AB	AB	BB	AB	BB	BB	AA	AB	BB
578	ctg8748	ctg8748_35337	6	59.345	59.345	AB	AB	AB	BB	AB	AB	BB	AB	BB	BB	AA	AB	BB	AB	AB	AB	AB	AB	BB	AB	BB	AA	BB	AA	AB	BB	AB	BB	AB	AA	AB	BB	AB	BB	AA	AB	AB	BB	AB	BB	BB	AA	AB	BB
580	ctg8748	ctg8748_35440	6	60.017	60.017	AB	AB	AB	AB	AB	AB	BB	AB	BB	BB	AA	AB	BB	AB	AB	AB	AB	AB	BB	AB	BB	AA	BB	AA	AB	BB	AB	BB	AB	AA	AB	BB	AB	BB	AA	AB	AB	BB	AB	BB	BB	AA	AB	BB
581	ctg8748	ctg8748_35492	6	60.017	60.017	AB	AB	AB	AB	AB	AB	BB	AB	BB	BB	AA	AB	BB	AB	AB	AB	AB	AB	BB	AB	BB	AA	BB	AA	AB	BB	AB	BB	AB	AA	AB	BB	AB	BB	AA	AB	AB	BB	AB	BB	BB	AA	AB	BB
582	ctg8748	ctg8748_37072	6	60.017	60.017	AB	AB	AB	AB	AB	AB	BB	AB	BB	BB	AA	AB	BB	AB	AB	AB	AB	AB	BB	AB	BB	AA	BB	AA	AB	BB	AB	BB	AB	AA	AB	BB	AB	BB	AA	AB	AB	BB	AB	BB	BB	AA	AB	BB
583	ctg8748	ctg8748_38822	6	58.674	58.674	AB	AB	AB	BB	AB	AB	BB	AB	BB	BB	AA	AB	BB	AB	AB	AB	AB	AB	BB	AB	BB	AA	BB	AA	AB	BB	AB	BB	AB	AA	AB	BB	AB	BB	AA	AB	AB	BB	AB	BB	BB	AA	AB	BB
584	ctg8748	ctg8748_41263	6	60.017	60.017	AB	AB	AB	AB	AB	AB	BB	AB	BB	BB	AA	AB	BB	AB	AB	AB	AB	AB	BB	AB	BB	AA	BB	AA	AB	BB	AB	BB	AB	AA	AB	BB	AB	BB	AA	AB	AB	BB	AB	BB	BB	AA	AB	BB
585	ctg8748	ctg8748_44284	6	60.017	60.017	AB	AB	AB	AB	AB	AB	BB	AB	BB	BB	AA	AB	BB	AB	AB	AB	AB	AB	BB	AB	BB	AA	BB	AA	AB	BB	AB	BB	AB	AA	AB	BB	AB	BB	AA	AB	AB	BB	AB	BB	BB	AA	AB	BB
586	ctg8748	ctg8748_44301	6	60.017	60.017	AB	AB	AB	AB	AB	AB	BB	AB	BB	BB	AA	AB	BB	AB	AB	AB	AB	AB	BB	AB	BB	AA	BB	AA	AB	BB	AB	BB	AB	AA	AB	BB	AB	BB	AA	AB	AB	BB	AB	BB	BB	AA	AB	BB
587	ctg8748	ctg8748_45818	6	59.345	59.345	AB	AB	AB	BB	AB	AB	BB	AB	BB	BB	AA	AB	BB	AB	AB	AB	AB	AB	BB	AB	BB	AA	BB	AA	AB	BB	AB	BB	AB	AA	AB	BB	AB	BB	AA	AB	AB	BB	AB	BB	BB	AA	AB	BB
588	ctg8748	ctg8748_74910	6	59.345	59.345	AB	AB	AB	BB	AB	AB	BB	AB	BB	BB	AA	AB	BB	AB	AB	AB	AB	AB	BB	AB	BB	AA	BB	AA	AB	BB	AB	BB	AB	AA	AB	BB	AB	BB	AA	AB	AB	BB	AB	BB	BB	AA	AB	BB
630	ctg8746	ctg8746_28714	14	31.815	31.815	AB	AB	AA	AA	AB	AA	AB	AB	AB	AA	AB	AB	AB	AB	BB	AB	AB	BB	AA	AB	AB	AB	AA	AB	BB	AB	AB	AA	AA	AA	AB	BB	AB	AB	AB	AB	AB	AA	AA	AB	AB	AB	AB	AA
631	ctg8746	ctg8746_29133	14	31.815	31.815	AB	AB	AA	AA	AB	AA	AB	AB	AB	AA	AB	AB	AB	AB	BB	AB	AB	BB	AA	AB	AB	AB	AA	AB	BB	AB	AB	AA	AA	AA	AB	BB	AB	AB	AB	AB	AB	AA	AA	AB	AB	AB	AB	AA
632	ctg8746	ctg8746_36925	14	31.815	31.815	AB	AB	AA	AA	AB	AA	AB	AB	AB	AA	AB	AB	AB	AB	BB	AB	AB	BB	AA	AB	AB	AB	AA	AB	BB	AB	AB	AA	AA	AA	AB	BB	AB	AB	AB	AB	AB	AA	AA	AB	AB	AB	AB	AA
633	ctg8746	ctg8746_36938	14	31.815	31.815	AB	AB	AA	AA	AB	AA	AB	AB	AB	AA	AB	AB	AB	AB	BB	AB	AB	BB	AA	AB	AB	AB	AA	AB	BB	AB	AB	AA	AA	AA	AB	BB	AB	AB	AB	AB	AB	AA	AA	AB	AB	AB	AB	AA
634	ctg8746	ctg8746_55499	14	31.815	31.815	AB	AB	AA	AA	AB	AA	AB	AB	AB	AA	AB	AB	AB	AB	BB	AB	AB	BB	AA	AB	AB	AB	AA	AB	BB	AB	AB	AA	AA	AA	AB	BB	AB	AB	AB	AB	AB	AA	AA	AB	AB	AB	AB	AA
635	ctg8746	ctg8746_55640	14	31.815	31.815	AB	AB	AA	AA	AB	AA	AB	AB	AB	AA	AB	AB	AB	AB	BB	AB	AB	BB	AA	AB	AB	AB	AA	AB	BB	AB	AB	AA	AA	AA	AB	BB	AB	AB	AB	AB	AB	AA	AA	AB	AB	AB	AB	AA
636	ctg8741	ctg8741_2318	3	18.222	18.222	AB	AB	AB	AB	AB	AA	AB	AB	AB	AA	AB	AB	AA	BB	AA	AA	AB	AA	BB	AB	AA	AB	BB	BB	BB	AB	BB	BB	AA	AB	AB	AB	AA	AB	AA	BB	AB	AB	BB	AA	AB	BB	AA	BB
637	ctg8741	ctg8741_10862	3	22.948	22.948	AB	AB	AB	AB	AB	AA	AB	AB	AB	AA	AB	AB	AA	BB	AA	AA	AB	AA	BB	AB	AA	AB	BB	BB	BB	AB	BB	BB	AA	AB	AB	AB	AA	AB	AA	BB	AB	AB	BB	AA	AB	BB	AA	BB
638	ctg8741	ctg8741_23839	3	18.222	18.222	AB	AB	AB	AB	AB	AA	AB	AB	AB	AA	AB	AB	AA	BB	AA	AA	AB	AA	BB	AB	AA	AB	BB	BB	BB	AB	BB	BB	AA	AB	AB	AB	AA	AB	AA	BB	AB	AB	BB	AA	AB	BB	AA	BB
640	ctg8741	ctg8741_23985	3	18.222	18.222	AB	AB	AB	AB	AB	AA	AB	AB	AB	AA	AB	AB	AA	BB	AA	AA	AB	AA	BB	AB	AA	AB	BB	BB	BB	AB	BB	BB	AA	AB	AB	AB	AA	AB	AA	BB	AB	AB	BB	AA	AB	BB	AA	BB
642	ctg8741	ctg8741_28536	3	18.222	18.222	AB	AB	AB	AB	AB	AA	AB	AB	AB	AA	AB	AB	AA	BB	AA	AA	AB	AA	BB	AB	AA	AB	BB	BB	BB	AB	BB	BB	AA	AB	AB	AB	AA	AB	AA	BB	AB	AB	BB	AA	AB	BB	AA	BB
643	ctg8741	ctg8741_28540	3	18.222	18.222	AB	AB	AB	AB	AB	AA	AB	AB	AB	AA	AB	AB	AA	BB	AA	AA	AB	AA	BB	AB	AA	AB	BB	BB	BB	AB	BB	BB	AA	AB	AB	AB	AA	AB	AA	BB	AB	AB	BB	AA	AB	BB	AA	BB
644	ctg8741	ctg8741_28572	3	18.222	18.222	AB	AB	AB	AB	AB	AA	AB	AB	AB	AA	AB	AB	AA	BB	AA	AA	AB	AA	BB	AB	AA	AB	BB	BB	BB	AB	BB	BB	AA	AB	AB	AB	AA	AB	AA	BB	AB	AB	BB	AA	AB	BB	AA	BB
645	ctg8741	ctg8741_28583	3	18.222	18.222	AB	AB	AB	AB	AB	AA	AB	AB	AB	AA	AB	AB	AA	BB	AA	AA	AB	AA	BB	AB	AA	AB	BB	BB	BB	AB	BB	BB	AA	AB	AB	AB	AA	AB	AA	BB	AB	AB	BB	AA	AB	BB	AA	BB
646	ctg8741	ctg8741_30181	3	18.222	18.222	AB	AB	AB	AB	AB	AA	AB	AB	AB	AA	AB	AB	AA	BB	AA	AA	AB	AA	BB	AB	AA	AB	BB	BB	BB	AB	BB	BB	AA	AB	AB	AB	AA	AB	AA	BB	AB	AB	BB	AA	AB	BB	AA	BB
647	ctg8741	ctg8741_33362	3	18.222	18.222	AB	AB	AB	AB	AB	AA	AB	AB	AB	AA	AB	AB	AA	BB	AA	AA	AB	AA	BB	AB	AA	AB	BB	BB	BB	AB	BB	BB	AA	AB	AB	AB	AA	AB	AA	BB	AB	AB	BB	AA	AB	BB	AA	BB
649	ctg8741	ctg8741_53915	3	18.222	18.222	AB	AB	AB	AB	AB	AA	AB	AB	AB	AA	AB	AB	AA	BB	AA	AA	AB	AA	BB	AB	AA	AB	BB	BB	BB	AB	BB	BB	AA	AB	AB	AB	AA	AB	AA	BB	AB	AB	BB	AA	AB	BB	AA	BB
650	ctg8741	ctg8741_53999	3	16.88	16.88	AB	AB	AB	AB	AB	AA	AB	AB	AB	AA	AB	AB	AA	BB	AA	AA	AB	AA	BB	AB	AA	AB	BB	BB	BB	AB	BB	BB	AA	AB	BB	AB	AA	AA	AA	BB	AB	AB	BB	AA	AB	BB	AA	BB
651	ctg8741	ctg8741_54279	3	22.948	22.948	AB	AB	AB	AB	AB	AA	AB	AB	AB	AA	AB	AB	AA	BB	AA	AA	AB	AA	BB	AB	AA	AB	BB	BB	BB	AB	BB	BB	AA	AB	AB	AB	AA	AB	AA	BB	AB	AB	BB	AA	AB	BB	AA	BB
652	ctg8741	ctg8741_54284	3	22.948	22.948	AB	AB	AB	AB	AB	AA	AB	AB	AB	AA	AB	AB	AA	BB	AA	AA	AB	AA	BB	AB	AA	AB	BB	BB	BB	AB	BB	BB	AA	AB	AB	AB	AA	AB	AA	BB	AB	AB	BB	AA	AB	BB	AA	BB
653	ctg8741	ctg8741_54951	3	22.948	22.948	AB	AB	AB	AB	AB	AA	AB	AB	AB	AA	AB	AB	AA	BB	AA	AA	AB	AA	BB	AB	AA	AB	BB	BB	BB	AB	BB	BB	AA	AB	AB	AB	AA	AB	AA	BB	AB	AB	BB	AA	AB	BB	AA	BB
654	ctg8741	ctg8741_59049	3	18.222	18.222	AB	AB	AB	AB	AB	AA	AB	AB	AB	AA	AB	AB	AA	BB	AA	AA	AB	AA	BB	AB	AA	AB	BB	BB	BB	AB	BB	BB	AA	AB	AB	AB	AA	AB	AA	BB	AB	AB	BB	AA	AB	BB	AA	BB
656	ctg37128	ctg37128_5386	2	62.141	62.141	AB	AB	BB	AB	BB	AB	AB	AA	AB	AB	BB	AB	BB	AA	AB	BB	AB	AB	AB	AB	BB	AB	AB	AB	AB	AA	AB	AA	AB	AB	BB	AB	BB	AA	AB	AA	AA	AB	AA	AB	BB	AA	BB	AB
657	ctg37128	ctg37128_5403	2	62.141	62.141	AB	AB	BB	AB	BB	AB	AB	AA	AB	AB	BB	AB	BB	AA	AB	BB	AB	AB	AB	AB	BB	AB	AB	AB	AB	AA	AB	AA	AB	AB	BB	AB	BB	AA	AB	AA	AA	AB	AA	AB	BB	AA	BB	AB
658	ctg37128	ctg37128_5409	2	62.141	62.141	AB	AB	BB	AB	BB	AB	AB	AA	AB	AB	BB	AB	BB	AA	AB	BB	AB	AB	AB	AB	BB	AB	AB	AB	AB	AA	AB	AA	AB	AB	BB	AB	BB	AA	AB	AA	AA	AB	AA	AB	BB	AA	BB	AB
660	ctg43356	ctg43356_1036	12	16.871	16.871	AB	AB	BB	AB	AA	AB	AA	AB	AB	AA	BB	BB	AB	AB	AB	AB	AB	AB	AB	AB	AA	AB	AA	AB	BB	BB	AB	AA	BB	AB	AB	AA	BB	AA	AB	AB	AB	AB	AA	BB	AB	AB	AB	AA
661	ctg43356	ctg43356_1051	12	16.871	16.871	AB	AB	BB	AB	AA	AB	AA	AB	AB	AA	BB	BB	AB	AB	AB	AB	AB	AB	AB	AB	AA	AB	AA	AB	BB	BB	AB	AA	BB	AB	AB	AA	BB	AA	AB	AB	AB	AB	AA	BB	AB	AB	AB	AA
662	ctg43356	ctg43356_7137	12	17.542	17.542	AB	AB	BB	AB	AA	AB	AB	AB	AB	AA	BB	BB	AB	AB	AB	AB	AB	AB	AB	AB	AA	AB	AA	AB	BB	BB	AB	AA	BB	AB	AB	AA	BB	AA	AB	AB	AB	AB	AA	BB	AB	AB	AB	AA
663	ctg43356	ctg43356_7438	12	17.542	17.542	AB	AB	BB	AB	AA	AB	AB	AB	AB	AA	BB	BB	AB	AB	AB	AB	AB	AB	AB	AB	AA	AB	AA	AB	BB	BB	AB	AA	BB	AB	AB	AA	BB	AA	AB	AB	AB	AB	AA	BB	AB	AB	AB	AA
668	tig00004411	tig00004411_8733	1	30.817	30.817	AB	AB	BB	AA	AA	AB	BB	AB	BB	AB	AB	AB	AA	AB	AB	AB	BB	BB	BB	AA	AB	BB	AB	BB	BB	BB	AB	AB	AA	AB	AB	AB	AA	BB	AB	AB	AA	AB	BB	BB	AB	AB	AB	AB
669	tig00004411	tig00004411_12963	1	30.817	30.817	AB	AB	BB	AA	AA	AB	BB	AB	BB	AB	AB	AB	AA	AB	AB	AB	BB	BB	BB	AA	AB	BB	AB	BB	BB	BB	AB	AB	AA	AB	AB	AB	AA	BB	AB	AB	AA	AB	BB	BB	AB	AB	AB	AB
670	tig00004411	tig00004411_22346	1	31.488	31.488	AB	AB	BB	AA	AA	AB	BB	AB	BB	AB	AB	AB	AA	AB	AB	AB	BB	BB	BB	AA	AB	BB	AB	BB	BB	BB	AB	AB	AA	AB	AB	AB	AA	BB	BB	AB	AA	AB	BB	BB	AB	AB	AB	AB
671	tig00004411	tig00004411_22829	1	31.488	31.488	AB	AB	BB	AA	AA	AB	BB	AB	BB	AB	AB	AB	AA	AB	AB	AB	BB	BB	BB	AA	AB	BB	AB	BB	BB	BB	AB	AB	AA	AB	AB	AB	AA	BB	BB	AB	AA	AB	BB	BB	AB	AB	AB	AB
672	tig00004411	tig00004411_25445	1	31.488	31.488	AB	AB	BB	AA	AA	AB	BB	AB	BB	AB	AB	AB	AA	AB	AB	AB	BB	BB	BB	AA	AB	BB	AB	BB	BB	BB	AB	AB	AA	AB	AB	AB	AA	BB	BB	AB	AA	AB	BB	BB	AB	AB	AB	AB
673	tig00004411	tig00004411_28338	1	31.488	31.488	AB	AB	BB	AA	AA	AB	BB	AB	BB	AB	AB	AB	AA	AB	AB	AB	BB	BB	BB	AA	AB	BB	AB	BB	BB	BB	AB	AB	AA	AB	AB	AB	AA	BB	BB	AB	AA	AB	BB	BB	AB	AB	AB	AB
674	tig00004411	tig00004411_28479	1	31.488	31.488	AB	AB	BB	AA	AA	AB	BB	AB	BB	AB	AB	AB	AA	AB	AB	AB	BB	BB	BB	AA	AB	BB	AB	BB	BB	BB	AB	AB	AA	AB	AB	AB	AA	BB	BB	AB	AA	AB	BB	BB	AB	AB	AB	AB
675	tig00004411	tig00004411_28519	1	31.488	31.488	AB	AB	BB	AA	AA	AB	BB	AB	BB	AB	AB	AB	AA	AB	AB	AB	BB	BB	BB	AA	AB	BB	AB	BB	BB	BB	AB	AB	AA	AB	AB	AB	AA	BB	BB	AB	AA	AB	BB	BB	AB	AB	AB	AB
676	tig00004411	tig00004411_32087	1	31.488	31.488	AB	AB	BB	AA	AA	AB	BB	AB	BB	AB	AB	AB	AA	AB	AB	AB	BB	BB	BB	AA	AB	BB	AB	BB	BB	BB	AB	AB	AA	AB	AB	AB	AA	BB	BB	AB	AA	AB	BB	BB	AB	AB	AB	AB
677	tig00004411	tig00004411_32116	1	31.488	31.488	AB	AB	BB	AA	AA	AB	BB	AB	BB	AB	AB	AB	AA	AB	AB	AB	BB	BB	BB	AA	AB	BB	AB	BB	BB	BB	AB	AB	AA	AB	AB	AB	AA	BB	BB	AB	AA	AB	BB	BB	AB	AB	AB	AB
678	tig00004411	tig00004411_32176	1	31.488	31.488	AB	AB	BB	AA	AA	AB	BB	AB	BB	AB	AB	AB	AA	AB	AB	AB	BB	BB	BB	AA	AB	BB	AB	BB	BB	BB	AB	AB	AA	AB	AB	AB	AA	BB	BB	AB	AA	AB	BB	BB	AB	AB	AB	AB
679	tig00004411	tig00004411_37509	1	31.488	31.488	AB	AB	BB	AA	AA	AB	BB	AB	BB	AB	AB	AB	AA	AB	AB	AB	BB	BB	BB	AA	AB	BB	AB	BB	BB	BB	AB	AB	AA	AB	AB	AB	AA	BB	BB	AB	AA	AB	BB	BB	AB	AB	AB	AB
680	tig00004411	tig00004411_37815	1	31.488	31.488	AB	AB	BB	AA	AA	AB	BB	AB	BB	AB	AB	AB	AA	AB	AB	AB	BB	BB	BB	AA	AB	BB	AB	BB	BB	BB	AB	AB	AA	AB	AB	AB	AA	BB	BB	AB	AA	AB	BB	BB	AB	AB	AB	AB
681	tig00004411	tig00004411_37971	1	31.488	31.488	AB	AB	BB	AA	AA	AB	BB	AB	BB	AB	AB	AB	AA	AB	AB	AB	BB	BB	BB	AA	AB	BB	AB	BB	BB	BB	AB	AB	AA	AB	AB	AB	AA	BB	BB	AB	AA	AB	BB	BB	AB	AB	AB	AB
682	tig00004411	tig00004411_41328	1	26.119	26.119	AB	AB	BB	AA	AA	AB	BB	AB	BB	BB	AB	AB	AA	AB	AB	AB	BB	BB	BB	AA	AB	BB	AB	BB	BB	BB	AB	AB	AA	AB	AB	AB	AA	BB	AA	AB	AA	AB	BB	BB	AB	AB	AB	AB
683	tig00004411	tig00004411_41333	1	26.119	26.119	AB	AB	BB	AA	AA	AB	BB	AB	BB	BB	AB	AB	AA	AB	AB	AB	BB	BB	BB	AA	AB	BB	AB	BB	BB	BB	AB	AB	AA	AB	AB	AB	AA	BB	AA	AB	AA	AB	BB	BB	AB	AB	AB	AB
684	tig00004411	tig00004411_41434	1	31.488	31.488	AB	AB	BB	AA	AA	AB	BB	AB	BB	AB	AB	AB	AA	AB	AB	AB	BB	BB	BB	AA	AB	BB	AB	BB	BB	BB	AB	AB	AA	AB	AB	AB	AA	BB	BB	AB	AA	AB	BB	BB	AB	AB	AB	AB
685	tig00004411	tig00004411_58767	1	31.488	31.488	AB	AB	BB	AA	AA	AB	BB	AB	BB	AB	AB	AB	AA	AB	AB	AB	BB	BB	BB	AA	AB	BB	AB	BB	BB	BB	AB	AB	AA	AB	AB	AB	AA	BB	BB	AB	AA	AB	BB	BB	AB	AB	AB	AB
686	tig00004411	tig00004411_78991	1	31.488	31.488	AB	AB	BB	AA	AA	AB	BB	AB	BB	AB	AB	AB	AA	AB	AB	AB	BB	BB	BB	AA	AB	BB	AB	BB	BB	BB	AB	AB	AA	AB	AB	AB	AA	BB	BB	AB	AA	AB	BB	BB	AB	AB	AB	AB
687	tig00004411	tig00004411_79093	1	31.488	31.488	AB	AB	BB	AA	AA	AB	BB	AB	BB	AB	AB	AB	AA	AB	AB	AB	BB	BB	BB	AA	AB	BB	AB	BB	BB	BB	AB	AB	AA	AB	AB	AB	AA	BB	BB	AB	AA	AB	BB	BB	AB	AB	AB	AB
688	tig00004411	tig00004411_83681	1	31.488	31.488	AB	AB	BB	AA	AA	AB	BB	AB	BB	AB	AB	AB	AA	AB	AB	AB	BB	BB	BB	AA	AB	BB	AB	BB	BB	BB	AB	AB	AA	AB	AB	AB	AA	BB	BB	AB	AA	AB	BB	BB	AB	AB	AB	AB
689	tig00004411	tig00004411_90299	1	30.817	30.817	AB	AB	BB	AA	AA	AB	BB	AB	BB	AB	AB	AB	AA	AB	AB	AB	BB	BB	BB	AA	AB	BB	AB	BB	BB	BB	AB	AB	AA	AB	AB	AB	AA	BB	AB	AB	AA	AB	BB	BB	AB	AB	AB	AB
690	tig00004411	tig00004411_105589	1	31.488	31.488	AB	AB	BB	AA	AA	AB	BB	AB	BB	AB	AB	AB	AA	AB	AB	AB	BB	BB	BB	AA	AB	BB	AB	BB	BB	BB	AB	AB	AA	AB	AB	AB	AA	BB	BB	AB	AA	AB	BB	BB	AB	AB	AB	AB
691	tig00004411	tig00004411_105609	1	31.488	31.488	AB	AB	BB	AA	AA	AB	BB	AB	BB	AB	AB	AB	AA	AB	AB	AB	BB	BB	BB	AA	AB	BB	AB	BB	BB	BB	AB	AB	AA	AB	AB	AB	AA	BB	BB	AB	AA	AB	BB	BB	AB	AB	AB	AB
692	tig00004411	tig00004411_105616	1	31.488	31.488	AB	AB	BB	AA	AA	AB	BB	AB	BB	AB	AB	AB	AA	AB	AB	AB	BB	BB	BB	AA	AB	BB	AB	BB	BB	BB	AB	AB	AA	AB	AB	AB	AA	BB	BB	AB	AA	AB	BB	BB	AB	AB	AB	AB
693	tig00004411	tig00004411_105681	1	31.488	31.488	AB	AB	BB	AA	AA	AB	BB	AB	BB	AB	AB	AB	AA	AB	AB	AB	BB	BB	BB	AA	AB	BB	AB	BB	BB	BB	AB	AB	AA	AB	AB	AB	AA	BB	BB	AB	AA	AB	BB	BB	AB	AB	AB	AB
694	tig00004411	tig00004411_109836	1	31.488	31.488	AB	AB	BB	AA	AA	AB	BB	AB	BB	AB	AB	AB	AA	AB	AB	AB	BB	BB	BB	AA	AB	BB	AB	BB	BB	BB	AB	AB	AA	AB	AB	AB	AA	BB	BB	AB	AA	AB	BB	BB	AB	AB	AB	AB
695	tig00004411	tig00004411_109933	1	31.488	31.488	AB	AB	BB	AA	AA	AB	BB	AB	BB	AB	AB	AB	AA	AB	AB	AB	BB	BB	BB	AA	AB	BB	AB	BB	BB	BB	AB	AB	AA	AB	AB	AB	AA	BB	BB	AB	AA	AB	BB	BB	AB	AB	AB	AB
696	tig00004411	tig00004411_147991	1	31.488	31.488	AB	AB	BB	AA	AA	AB	BB	AB	BB	AB	AB	AB	AA	AB	AB	AB	BB	BB	BB	AA	AB	BB	AB	BB	BB	BB	AB	AB	AA	AB	AB	AB	AA	BB	BB	AB	AA	AB	BB	BB	AB	AB	AB	AB
697	tig00004411	tig00004411_149645	1	31.488	31.488	AB	AB	BB	AA	AA	AB	BB	AB	BB	AB	AB	AB	AA	AB	AB	AB	BB	BB	BB	AA	AB	BB	AB	BB	BB	BB	AB	AB	AA	AB	AB	AB	AA	BB	BB	AB	AA	AB	BB	BB	AB	AB	AB	AB
698	tig00004411	tig00004411_189551	1	30.817	30.817	AB	AB	BB	AA	AA	AB	BB	AB	BB	AB	AB	AB	AA	AB	AB	AB	BB	BB	BB	AA	AB	BB	AB	BB	BB	BB	AB	AB	AA	AB	AB	AB	AA	BB	AB	AB	AA	AB	BB	BB	AB	AB	AB	AB
699	tig00004411	tig00004411_209857	1	30.817	30.817	AB	AB	BB	AA	AA	AB	BB	AB	BB	AB	AB	AB	AA	AB	AB	AB	BB	BB	BB	AA	AB	BB	AB	BB	BB	BB	AB	AB	AA	AB	AB	AB	AA	BB	AB	AB	AA	AB	BB	BB	AB	AB	AB	AB
700	tig00004411	tig00004411_213632	1	31.488	31.488	AB	AB	BB	AA	AA	AB	BB	AB	BB	AB	AB	AB	AA	AB	AB	AB	BB	BB	BB	AA	AB	BB	AB	BB	BB	BB	AB	AB	AA	AB	AB	AB	AA	BB	BB	AB	AA	AB	BB	BB	AB	AB	AB	AB
701	tig00004411	tig00004411_216671	1	30.817	30.817	AB	AB	BB	AA	AA	AB	BB	AB	BB	AB	AB	AB	AA	AB	AB	AB	BB	BB	BB	AA	AB	BB	AB	BB	BB	BB	AB	AB	AA	AB	AB	AB	AA	BB	AB	AB	AA	AB	BB	BB	AB	AB	AB	AB
702	tig00004411	tig00004411_241463	1	31.488	31.488	AB	AB	BB	AA	AA	AB	BB	AB	BB	AB	AB	AB	AA	AB	AB	AB	BB	BB	BB	AA	AB	BB	AB	BB	BB	BB	AB	AB	AA	AB	AB	AB	AA	BB	BB	AB	AA	AB	BB	BB	AB	AB	AB	AB
703	tig00004411	tig00004411_246443	1	31.488	31.488	AB	AB	BB	AA	AA	AB	BB	AB	BB	AB	AB	AB	AA	AB	AB	AB	BB	BB	BB	AA	AB	BB	AB	BB	BB	BB	AB	AB	AA	AB	AB	AB	AA	BB	BB	AB	AA	AB	BB	BB	AB	AB	AB	AB
704	tig00004411	tig00004411_246448	1	31.488	31.488	AB	AB	BB	AA	AA	AB	BB	AB	BB	AB	AB	AB	AA	AB	AB	AB	BB	BB	BB	AA	AB	BB	AB	BB	BB	BB	AB	AB	AA	AB	AB	AB	AA	BB	BB	AB	AA	AB	BB	BB	AB	AB	AB	AB
705	tig00004411	tig00004411_246450	1	31.488	31.488	AB	AB	BB	AA	AA	AB	BB	AB	BB	AB	AB	AB	AA	AB	AB	AB	BB	BB	BB	AA	AB	BB	AB	BB	BB	BB	AB	AB	AA	AB	AB	AB	AA	BB	BB	AB	AA	AB	BB	BB	AB	AB	AB	AB
706	tig00004411	tig00004411_246452	1	31.488	31.488	AB	AB	BB	AA	AA	AB	BB	AB	BB	AB	AB	AB	AA	AB	AB	AB	BB	BB	BB	AA	AB	BB	AB	BB	BB	BB	AB	AB	AA	AB	AB	AB	AA	BB	BB	AB	AA	AB	BB	BB	AB	AB	AB	AB
707	tig00004411	tig00004411_246475	1	31.488	31.488	AB	AB	BB	AA	AA	AB	BB	AB	BB	AB	AB	AB	AA	AB	AB	AB	BB	BB	BB	AA	AB	BB	AB	BB	BB	BB	AB	AB	AA	AB	AB	AB	AA	BB	BB	AB	AA	AB	BB	BB	AB	AB	AB	AB
708	tig00004411	tig00004411_247549	1	31.488	31.488	AB	AB	BB	AA	AA	AB	BB	AB	BB	AB	AB	AB	AA	AB	AB	AB	BB	BB	BB	AA	AB	BB	AB	BB	BB	BB	AB	AB	AA	AB	AB	AB	AA	BB	BB	AB	AA	AB	BB	BB	AB	AB	AB	AB
709	tig00004411	tig00004411_247709	1	31.488	31.488	AB	AB	BB	AA	AA	AB	BB	AB	BB	AB	AB	AB	AA	AB	AB	AB	BB	BB	BB	AA	AB	BB	AB	BB	BB	BB	AB	AB	AA	AB	AB	AB	AA	BB	BB	AB	AA	AB	BB	BB	AB	AB	AB	AB
710	tig00004411	tig00004411_251207	1	31.488	31.488	AB	AB	BB	AA	AA	AB	BB	AB	BB	AB	AB	AB	AA	AB	AB	AB	BB	BB	BB	AA	AB	BB	AB	BB	BB	BB	AB	AB	AA	AB	AB	AB	AA	BB	BB	AB	AA	AB	BB	BB	AB	AB	AB	AB
711	tig00004411	tig00004411_251268	1	31.488	31.488	AB	AB	BB	AA	AA	AB	BB	AB	BB	AB	AB	AB	AA	AB	AB	AB	BB	BB	BB	AA	AB	BB	AB	BB	BB	BB	AB	AB	AA	AB	AB	AB	AA	BB	BB	AB	AA	AB	BB	BB	AB	AB	AB	AB
713	tig00004411	tig00004411_270029	1	31.488	31.488	AB	AB	BB	AA	AA	AB	BB	AB	BB	AB	AB	AB	AA	AB	AB	AB	BB	BB	BB	AA	AB	BB	AB	BB	BB	BB	AB	AB	AA	AB	AB	AB	AA	BB	BB	AB	AA	AB	BB	BB	AB	AB	AB	AB
714	tig00004411	tig00004411_270259	1	31.488	31.488	AB	AB	BB	AA	AA	AB	BB	AB	BB	AB	AB	AB	AA	AB	AB	AB	BB	BB	BB	AA	AB	BB	AB	BB	BB	BB	AB	AB	AA	AB	AB	AB	AA	BB	BB	AB	AA	AB	BB	BB	AB	AB	AB	AB
715	tig00004411	tig00004411_272144	1	32.159	32.159	AB	AB	BB	AA	AA	AB	BB	AB	BB	AB	AB	AB	AA	AB	AB	AB	BB	BB	BB	AA	AB	BB	AB	BB	BB	BB	AB	AB	AA	AB	AB	AB	AA	BB	BB	AB	AA	AB	BB	BB	AB	AB	AB	AB
716	tig00004411	tig00004411_297585	1	31.488	31.488	AB	AB	BB	AA	AA	AB	BB	AB	BB	AB	AB	AB	AA	AB	AB	AB	BB	BB	BB	AA	AB	BB	AB	BB	BB	BB	AB	AB	AA	AB	AB	AB	AA	BB	BB	AB	AA	AB	BB	BB	AB	AB	AB	AB
717	tig00004411	tig00004411_297591	1	31.488	31.488	AB	AB	BB	AA	AA	AB	BB	AB	BB	AB	AB	AB	AA	AB	AB	AB	BB	BB	BB	AA	AB	BB	AB	BB	BB	BB	AB	AB	AA	AB	AB	AB	AA	BB	BB	AB	AA	AB	BB	BB	AB	AB	AB	AB
718	tig00004411	tig00004411_297636	1	31.488	31.488	AB	AB	BB	AA	AA	AB	BB	AB	BB	AB	AB	AB	AA	AB	AB	AB	BB	BB	BB	AA	AB	BB	AB	BB	BB	BB	AB	AB	AA	AB	AB	AB	AA	BB	BB	AB	AA	AB	BB	BB	AB	AB	AB	AB
719	tig00004411	tig00004411_297639	1	31.488	31.488	AB	AB	BB	AA	AA	AB	BB	AB	BB	AB	AB	AB	AA	AB	AB	AB	BB	BB	BB	AA	AB	BB	AB	BB	BB	BB	AB	AB	AA	AB	AB	AB	AA	BB	BB	AB	AA	AB	BB	BB	AB	AB	AB	AB
720	tig00004411	tig00004411_297671	1	31.488	31.488	AB	AB	BB	AA	AA	AB	BB	AB	BB	AB	AB	AB	AA	AB	AB	AB	BB	BB	BB	AA	AB	BB	AB	BB	BB	BB	AB	AB	AA	AB	AB	AB	AA	BB	BB	AB	AA	AB	BB	BB	AB	AB	AB	AB
721	tig00004411	tig00004411_297786	1	31.488	31.488	AB	AB	BB	AA	AA	AB	BB	AB	BB	AB	AB	AB	AA	AB	AB	AB	BB	BB	BB	AA	AB	BB	AB	BB	BB	BB	AB	AB	AA	AB	AB	AB	AA	BB	BB	AB	AA	AB	BB	BB	AB	AB	AB	AB
722	tig00004411	tig00004411_297797	1	31.488	31.488	AB	AB	BB	AA	AA	AB	BB	AB	BB	AB	AB	AB	AA	AB	AB	AB	BB	BB	BB	AA	AB	BB	AB	BB	BB	BB	AB	AB	AA	AB	AB	AB	AA	BB	BB	AB	AA	AB	BB	BB	AB	AB	AB	AB
723	tig00004411	tig00004411_297809	1	31.488	31.488	AB	AB	BB	AA	AA	AB	BB	AB	BB	AB	AB	AB	AA	AB	AB	AB	BB	BB	BB	AA	AB	BB	AB	BB	BB	BB	AB	AB	AA	AB	AB	AB	AA	BB	BB	AB	AA	AB	BB	BB	AB	AB	AB	AB
724	tig00004411	tig00004411_297814	1	31.488	31.488	AB	AB	BB	AA	AA	AB	BB	AB	BB	AB	AB	AB	AA	AB	AB	AB	BB	BB	BB	AA	AB	BB	AB	BB	BB	BB	AB	AB	AA	AB	AB	AB	AA	BB	BB	AB	AA	AB	BB	BB	AB	AB	AB	AB
725	tig00004411	tig00004411_328637	1	31.488	31.488	AB	AB	BB	AA	AA	AB	BB	AB	BB	AB	AB	AB	AA	AB	AB	AB	BB	BB	BB	AA	AB	BB	AB	BB	BB	BB	AB	AB	AA	AB	AB	AB	AA	BB	BB	AB	AA	AB	BB	BB	AB	AB	AB	AB
726	tig00004411	tig00004411_341504	1	31.488	31.488	AB	AB	BB	AA	AA	AB	BB	AB	BB	AB	AB	AB	AA	AB	AB	AB	BB	BB	BB	AA	AB	BB	AB	BB	BB	BB	AB	AB	AA	AB	AB	AB	AA	BB	BB	AB	AA	AB	BB	BB	AB	AB	AB	AB
727	tig00004411	tig00004411_341529	1	31.488	31.488	AB	AB	BB	AA	AA	AB	BB	AB	BB	AB	AB	AB	AA	AB	AB	AB	BB	BB	BB	AA	AB	BB	AB	BB	BB	BB	AB	AB	AA	AB	AB	AB	AA	BB	BB	AB	AA	AB	BB	BB	AB	AB	AB	AB
728	tig00004411	tig00004411_341541	1	31.488	31.488	AB	AB	BB	AA	AA	AB	BB	AB	BB	AB	AB	AB	AA	AB	AB	AB	BB	BB	BB	AA	AB	BB	AB	BB	BB	BB	AB	AB	AA	AB	AB	AB	AA	BB	BB	AB	AA	AB	BB	BB	AB	AB	AB	AB
729	tig00004411	tig00004411_341544	1	31.488	31.488	AB	AB	BB	AA	AA	AB	BB	AB	BB	AB	AB	AB	AA	AB	AB	AB	BB	BB	BB	AA	AB	BB	AB	BB	BB	BB	AB	AB	AA	AB	AB	AB	AA	BB	BB	AB	AA	AB	BB	BB	AB	AB	AB	AB
730	tig00004411	tig00004411_341629	1	32.159	32.159	AB	AB	BB	AA	AA	AB	BB	AB	BB	AB	AB	AB	AA	AB	AB	AB	BB	BB	BB	AA	AB	BB	AB	BB	BB	BB	AB	AB	AA	AB	AB	AB	AA	BB	BB	AB	AA	AB	BB	BB	AB	AB	AB	AB
731	tig00004411	tig00004411_342791	1	31.488	31.488	AB	AB	BB	AA	AA	AB	BB	AB	BB	AB	AB	AB	AA	AB	AB	AB	BB	BB	BB	AA	AB	BB	AB	BB	BB	BB	AB	AB	AA	AB	AB	AB	AA	BB	BB	AB	AA	AB	BB	BB	AB	AB	AB	AB
732	tig00004411	tig00004411_342812	1	31.488	31.488	AB	AB	BB	AA	AA	AB	BB	AB	BB	AB	AB	AB	AA	AB	AB	AB	BB	BB	BB	AA	AB	BB	AB	BB	BB	BB	AB	AB	AA	AB	AB	AB	AA	BB	BB	AB	AA	AB	BB	BB	AB	AB	AB	AB
733	tig00004411	tig00004411_343014	1	31.488	31.488	AB	AB	BB	AA	AA	AB	BB	AB	BB	AB	AB	AB	AA	AB	AB	AB	BB	BB	BB	AA	AB	BB	AB	BB	BB	BB	AB	AB	AA	AB	AB	AB	AA	BB	BB	AB	AA	AB	BB	BB	AB	AB	AB	AB
734	tig00004411	tig00004411_343034	1	31.488	31.488	AB	AB	BB	AA	AA	AB	BB	AB	BB	AB	AB	AB	AA	AB	AB	AB	BB	BB	BB	AA	AB	BB	AB	BB	BB	BB	AB	AB	AA	AB	AB	AB	AA	BB	BB	AB	AA	AB	BB	BB	AB	AB	AB	AB
735	tig00004411	tig00004411_354137	1	31.488	31.488	AB	AB	BB	AA	AA	AB	BB	AB	BB	AB	AB	AB	AA	AB	AB	AB	BB	BB	BB	AA	AB	BB	AB	BB	BB	BB	AB	AB	AA	AB	AB	AB	AA	BB	BB	AB	AA	AB	BB	BB	AB	AB	AB	AB
736	tig00004411	tig00004411_360917	1	31.488	31.488	AB	AB	BB	AA	AA	AB	BB	AB	BB	AB	AB	AB	AA	AB	AB	AB	BB	BB	BB	AA	AB	BB	AB	BB	BB	BB	AB	AB	AA	AB	AB	AB	AA	BB	BB	AB	AA	AB	BB	BB	AB	AB	AB	AB
737	tig00004411	tig00004411_360972	1	31.488	31.488	AB	AB	BB	AA	AA	AB	BB	AB	BB	AB	AB	AB	AA	AB	AB	AB	BB	BB	BB	AA	AB	BB	AB	BB	BB	BB	AB	AB	AA	AB	AB	AB	AA	BB	BB	AB	AA	AB	BB	BB	AB	AB	AB	AB
738	tig00004411	tig00004411_361262	1	31.488	31.488	AB	AB	BB	AA	AA	AB	BB	AB	BB	AB	AB	AB	AA	AB	AB	AB	BB	BB	BB	AA	AB	BB	AB	BB	BB	BB	AB	AB	AA	AB	AB	AB	AA	BB	BB	AB	AA	AB	BB	BB	AB	AB	AB	AB
739	tig00004411	tig00004411_372659	1	31.488	31.488	AB	AB	BB	AA	AA	AB	BB	AB	BB	AB	AB	AB	AA	AB	AB	AB	BB	BB	BB	AA	AB	BB	AB	BB	BB	BB	AB	AB	AA	AB	AB	AB	AA	BB	BB	AB	AA	AB	BB	BB	AB	AB	AB	AB
740	tig00004411	tig00004411_372729	1	31.488	31.488	AB	AB	BB	AA	AA	AB	BB	AB	BB	AB	AB	AB	AA	AB	AB	AB	BB	BB	BB	AA	AB	BB	AB	BB	BB	BB	AB	AB	AA	AB	AB	AB	AA	BB	BB	AB	AA	AB	BB	BB	AB	AB	AB	AB
741	tig00004411	tig00004411_372790	1	31.488	31.488	AB	AB	BB	AA	AA	AB	BB	AB	BB	AB	AB	AB	AA	AB	AB	AB	BB	BB	BB	AA	AB	BB	AB	BB	BB	BB	AB	AB	AA	AB	AB	AB	AA	BB	BB	AB	AA	AB	BB	BB	AB	AB	AB	AB
742	tig00004411	tig00004411_372818	1	31.488	31.488	AB	AB	BB	AA	AA	AB	BB	AB	BB	AB	AB	AB	AA	AB	AB	AB	BB	BB	BB	AA	AB	BB	AB	BB	BB	BB	AB	AB	AA	AB	AB	AB	AA	BB	BB	AB	AA	AB	BB	BB	AB	AB	AB	AB
743	tig00004411	tig00004411_372836	1	31.488	31.488	AB	AB	BB	AA	AA	AB	BB	AB	BB	AB	AB	AB	AA	AB	AB	AB	BB	BB	BB	AA	AB	BB	AB	BB	BB	BB	AB	AB	AA	AB	AB	AB	AA	BB	BB	AB	AA	AB	BB	BB	AB	AB	AB	AB
744	tig00004411	tig00004411_372852	1	31.488	31.488	AB	AB	BB	AA	AA	AB	BB	AB	BB	AB	AB	AB	AA	AB	AB	AB	BB	BB	BB	AA	AB	BB	AB	BB	BB	BB	AB	AB	AA	AB	AB	AB	AA	BB	BB	AB	AA	AB	BB	BB	AB	AB	AB	AB
745	tig00004411	tig00004411_387685	1	31.488	31.488	AB	AB	BB	AA	AA	AB	BB	AB	BB	AB	AB	AB	AA	AB	AB	AB	BB	BB	BB	AA	AB	BB	AB	BB	BB	BB	AB	AB	AA	AB	AB	AB	AA	BB	BB	AB	AA	AB	BB	BB	AB	AB	AB	AB
746	tig00004411	tig00004411_387745	1	31.488	31.488	AB	AB	BB	AA	AA	AB	BB	AB	BB	AB	AB	AB	AA	AB	AB	AB	BB	BB	BB	AA	AB	BB	AB	BB	BB	BB	AB	AB	AA	AB	AB	AB	AA	BB	BB	AB	AA	AB	BB	BB	AB	AB	AB	AB
747	tig00004411	tig00004411_387746	1	31.488	31.488	AB	AB	BB	AA	AA	AB	BB	AB	BB	AB	AB	AB	AA	AB	AB	AB	BB	BB	BB	AA	AB	BB	AB	BB	BB	BB	AB	AB	AA	AB	AB	AB	AA	BB	BB	AB	AA	AB	BB	BB	AB	AB	AB	AB
748	tig00004411	tig00004411_387809	1	31.488	31.488	AB	AB	BB	AA	AA	AB	BB	AB	BB	AB	AB	AB	AA	AB	AB	AB	BB	BB	BB	AA	AB	BB	AB	BB	BB	BB	AB	AB	AA	AB	AB	AB	AA	BB	BB	AB	AA	AB	BB	BB	AB	AB	AB	AB
749	tig00004411	tig00004411_387846	1	31.488	31.488	AB	AB	BB	AA	AA	AB	BB	AB	BB	AB	AB	AB	AA	AB	AB	AB	BB	BB	BB	AA	AB	BB	AB	BB	BB	BB	AB	AB	AA	AB	AB	AB	AA	BB	BB	AB	AA	AB	BB	BB	AB	AB	AB	AB
750	tig00004411	tig00004411_387934	1	31.488	31.488	AB	AB	BB	AA	AA	AB	BB	AB	BB	AB	AB	AB	AA	AB	AB	AB	BB	BB	BB	AA	AB	BB	AB	BB	BB	BB	AB	AB	AA	AB	AB	AB	AA	BB	BB	AB	AA	AB	BB	BB	AB	AB	AB	AB
751	tig00004411	tig00004411_388036	1	31.488	31.488	AB	AB	BB	AA	AA	AB	BB	AB	BB	AB	AB	AB	AA	AB	AB	AB	BB	BB	BB	AA	AB	BB	AB	BB	BB	BB	AB	AB	AA	AB	AB	AB	AA	BB	BB	AB	AA	AB	BB	BB	AB	AB	AB	AB
752	tig00004411	tig00004411_388037	1	31.488	31.488	AB	AB	BB	AA	AA	AB	BB	AB	BB	AB	AB	AB	AA	AB	AB	AB	BB	BB	BB	AA	AB	BB	AB	BB	BB	BB	AB	AB	AA	AB	AB	AB	AA	BB	BB	AB	AA	AB	BB	BB	AB	AB	AB	AB
753	tig00004411	tig00004411_388070	1	31.488	31.488	AB	AB	BB	AA	AA	AB	BB	AB	BB	AB	AB	AB	AA	AB	AB	AB	BB	BB	BB	AA	AB	BB	AB	BB	BB	BB	AB	AB	AA	AB	AB	AB	AA	BB	BB	AB	AA	AB	BB	BB	AB	AB	AB	AB
754	tig00004411	tig00004411_421259	1	31.488	31.488	AB	AB	BB	AA	AA	AB	BB	AB	BB	AB	AB	AB	AA	AB	AB	AB	BB	BB	BB	AA	AB	BB	AB	BB	BB	BB	AB	AB	AA	AB	AB	AB	AA	BB	BB	AB	AA	AB	BB	BB	AB	AB	AB	AB
755	tig00004411	tig00004411_426955	1	31.488	31.488	AB	AB	BB	AA	AA	AB	BB	AB	BB	AB	AB	AB	AA	AB	AB	AB	BB	BB	BB	AA	AB	BB	AB	BB	BB	BB	AB	AB	AA	AB	AB	AB	AA	BB	BB	AB	AA	AB	BB	BB	AB	AB	AB	AB
756	tig00004411	tig00004411_433359	1	31.488	31.488	AB	AB	BB	AA	AA	AB	BB	AB	BB	AB	AB	AB	AA	AB	AB	AB	BB	BB	BB	AA	AB	BB	AB	BB	BB	BB	AB	AB	AA	AB	AB	AB	AA	BB	BB	AB	AA	AB	BB	BB	AB	AB	AB	AB
757	tig00004411	tig00004411_433384	1	30.817	30.817	AB	AB	BB	AA	AA	AB	BB	AB	BB	AB	AB	AB	AA	AB	AB	AB	BB	BB	BB	AA	AB	BB	AB	BB	BB	BB	AB	AB	AA	AB	AB	AB	AA	BB	AB	AB	AA	AB	BB	BB	AB	AB	AB	AB
758	tig00004411	tig00004411_433402	1	26.119	26.119	AB	AB	BB	AA	AA	AB	BB	AB	BB	BB	AB	AB	AA	AB	AB	AB	BB	BB	BB	AA	AB	BB	AB	BB	BB	BB	AB	AB	AA	AB	AB	AB	AA	BB	AA	AB	AA	AB	BB	BB	AB	AB	AB	AB
759	tig00004411	tig00004411_433469	1	31.488	31.488	AB	AB	BB	AA	AA	AB	BB	AB	BB	AB	AB	AB	AA	AB	AB	AB	BB	BB	BB	AA	AB	BB	AB	BB	BB	BB	AB	AB	AA	AB	AB	AB	AA	BB	BB	AB	AA	AB	BB	BB	AB	AB	AB	AB
760	tig00004411	tig00004411_453453	1	31.488	31.488	AB	AB	BB	AA	AA	AB	BB	AB	BB	AB	AB	AB	AA	AB	AB	AB	BB	BB	BB	AA	AB	BB	AB	BB	BB	BB	AB	AB	AA	AB	AB	AB	AA	BB	BB	AB	AA	AB	BB	BB	AB	AB	AB	AB
761	tig00004411	tig00004411_473471	1	31.488	31.488	AB	AB	BB	AA	AA	AB	BB	AB	BB	AB	AB	AB	AA	AB	AB	AB	BB	BB	BB	AA	AB	BB	AB	BB	BB	BB	AB	AB	AA	AB	AB	AB	AA	BB	BB	AB	AA	AB	BB	BB	AB	AB	AB	AB
762	tig00004411	tig00004411_473489	1	31.488	31.488	AB	AB	BB	AA	AA	AB	BB	AB	BB	AB	AB	AB	AA	AB	AB	AB	BB	BB	BB	AA	AB	BB	AB	BB	BB	BB	AB	AB	AA	AB	AB	AB	AA	BB	BB	AB	AA	AB	BB	BB	AB	AB	AB	AB
763	tig00004411	tig00004411_473600	1	31.488	31.488	AB	AB	BB	AA	AA	AB	BB	AB	BB	AB	AB	AB	AA	AB	AB	AB	BB	BB	BB	AA	AB	BB	AB	BB	BB	BB	AB	AB	AA	AB	AB	AB	AA	BB	BB	AB	AA	AB	BB	BB	AB	AB	AB	AB
766	tig00004411	tig00004411_484491	1	31.488	31.488	AB	AB	BB	AA	AA	AB	BB	AB	BB	AB	AB	AB	AA	AB	AB	AB	BB	BB	BB	AA	AB	BB	AB	BB	BB	BB	AB	AB	AA	AB	AB	AB	AA	BB	BB	AB	AA	AB	BB	BB	AB	AB	AB	AB
767	tig00004411	tig00004411_484582	1	31.488	31.488	AB	AB	BB	AA	AA	AB	BB	AB	BB	AB	AB	AB	AA	AB	AB	AB	BB	BB	BB	AA	AB	BB	AB	BB	BB	BB	AB	AB	AA	AB	AB	AB	AA	BB	BB	AB	AA	AB	BB	BB	AB	AB	AB	AB
774	tig00004411	tig00004411_499506	1	31.488	31.488	AB	AB	BB	AA	AA	AB	BB	AB	BB	AB	AB	AB	AA	AB	AB	AB	BB	BB	BB	AA	AB	BB	AB	BB	BB	BB	AB	AB	AA	AB	AB	AB	AA	BB	BB	AB	AA	AB	BB	BB	AB	AB	AB	AB
775	tig00004411	tig00004411_502041	1	31.488	31.488	AB	AB	BB	AA	AA	AB	BB	AB	BB	AB	AB	AB	AA	AB	AB	AB	BB	BB	BB	AA	AB	BB	AB	BB	BB	BB	AB	AB	AA	AB	AB	AB	AA	BB	BB	AB	AA	AB	BB	BB	AB	AB	AB	AB
776	tig00004411	tig00004411_504341	1	31.488	31.488	AB	AB	BB	AA	AA	AB	BB	AB	BB	AB	AB	AB	AA	AB	AB	AB	BB	BB	BB	AA	AB	BB	AB	BB	BB	BB	AB	AB	AA	AB	AB	AB	AA	BB	BB	AB	AA	AB	BB	BB	AB	AB	AB	AB
780	tig00004411	tig00004411_504768	1	31.488	31.488	AB	AB	BB	AA	AA	AB	BB	AB	BB	AB	AB	AB	AA	AB	AB	AB	BB	BB	BB	AA	AB	BB	AB	BB	BB	BB	AB	AB	AA	AB	AB	AB	AA	BB	BB	AB	AA	AB	BB	BB	AB	AB	AB	AB
782	tig00004411	tig00004411_505066	1	31.488	31.488	AB	AB	BB	AA	AA	AB	BB	AB	BB	AB	AB	AB	AA	AB	AB	AB	BB	BB	BB	AA	AB	BB	AB	BB	BB	BB	AB	AB	AA	AB	AB	AB	AA	BB	BB	AB	AA	AB	BB	BB	AB	AB	AB	AB
783	tig00004411	tig00004411_505105	1	31.488	31.488	AB	AB	BB	AA	AA	AB	BB	AB	BB	AB	AB	AB	AA	AB	AB	AB	BB	BB	BB	AA	AB	BB	AB	BB	BB	BB	AB	AB	AA	AB	AB	AB	AA	BB	BB	AB	AA	AB	BB	BB	AB	AB	AB	AB
784	tig00004411	tig00004411_505325	1	26.119	26.119	AB	AB	BB	AA	AA	AB	BB	AB	BB	BB	AB	AB	AA	AB	AB	AB	BB	BB	BB	AA	AB	BB	AB	BB	BB	BB	AB	AB	AA	AB	AB	AB	AA	BB	AA	AB	AA	AB	BB	BB	AB	AB	AB	AB
785	tig00004411	tig00004411_508597	1	31.488	31.488	AB	AB	BB	AA	AA	AB	BB	AB	BB	AB	AB	AB	AA	AB	AB	AB	BB	BB	BB	AA	AB	BB	AB	BB	BB	BB	AB	AB	AA	AB	AB	AB	AA	BB	BB	AB	AA	AB	BB	BB	AB	AB	AB	AB
786	tig00004411	tig00004411_508651	1	31.488	31.488	AB	AB	BB	AA	AA	AB	BB	AB	BB	AB	AB	AB	AA	AB	AB	AB	BB	BB	BB	AA	AB	BB	AB	BB	BB	BB	AB	AB	AA	AB	AB	AB	AA	BB	BB	AB	AA	AB	BB	BB	AB	AB	AB	AB
787	tig00004411	tig00004411_513446	1	31.488	31.488	AB	AB	BB	AA	AA	AB	BB	AB	BB	AB	AB	AB	AA	AB	AB	AB	BB	BB	BB	AA	AB	BB	AB	BB	BB	BB	AB	AB	AA	AB	AB	AB	AA	BB	BB	AB	AA	AB	BB	BB	AB	AB	AB	AB
790	tig00004411	tig00004411_535033	1	31.488	31.488	AB	AB	BB	AA	AA	AB	BB	AB	BB	AB	AB	AB	AA	AB	AB	AB	BB	BB	BB	AA	AB	BB	AB	BB	BB	BB	AB	AB	AA	AB	AB	AB	AA	BB	BB	AB	AA	AB	BB	BB	AB	AB	AB	AB
791	tig00004411	tig00004411_535166	1	31.488	31.488	AB	AB	BB	AA	AA	AB	BB	AB	BB	AB	AB	AB	AA	AB	AB	AB	BB	BB	BB	AA	AB	BB	AB	BB	BB	BB	AB	AB	AA	AB	AB	AB	AA	BB	BB	AB	AA	AB	BB	BB	AB	AB	AB	AB
792	tig00004411	tig00004411_535169	1	31.488	31.488	AB	AB	BB	AA	AA	AB	BB	AB	BB	AB	AB	AB	AA	AB	AB	AB	BB	BB	BB	AA	AB	BB	AB	BB	BB	BB	AB	AB	AA	AB	AB	AB	AA	BB	BB	AB	AA	AB	BB	BB	AB	AB	AB	AB
793	tig00004411	tig00004411_535188	1	31.488	31.488	AB	AB	BB	AA	AA	AB	BB	AB	BB	AB	AB	AB	AA	AB	AB	AB	BB	BB	BB	AA	AB	BB	AB	BB	BB	BB	AB	AB	AA	AB	AB	AB	AA	BB	BB	AB	AA	AB	BB	BB	AB	AB	AB	AB
794	tig00004411	tig00004411_535363	1	31.488	31.488	AB	AB	BB	AA	AA	AB	BB	AB	BB	AB	AB	AB	AA	AB	AB	AB	BB	BB	BB	AA	AB	BB	AB	BB	BB	BB	AB	AB	AA	AB	AB	AB	AA	BB	BB	AB	AA	AB	BB	BB	AB	AB	AB	AB
796	tig00004411	tig00004411_560900	1	31.488	31.488	AB	AB	BB	AA	AA	AB	BB	AB	BB	AB	AB	AB	AA	AB	AB	AB	BB	BB	BB	AA	AB	BB	AB	BB	BB	BB	AB	AB	AA	AB	AB	AB	AA	BB	BB	AB	AA	AB	BB	BB	AB	AB	AB	AB
797	tig00004411	tig00004411_588301	1	31.488	31.488	AB	AB	BB	AA	AA	AB	BB	AB	BB	AB	AB	AB	AA	AB	AB	AB	BB	BB	BB	AA	AB	BB	AB	BB	BB	BB	AB	AB	AA	AB	AB	AB	AA	BB	BB	AB	AA	AB	BB	BB	AB	AB	AB	AB
799	tig00004411	tig00004411_592950	1	26.119	26.119	AB	AB	BB	AA	AA	AB	BB	AB	BB	BB	AB	AB	AA	AB	AB	AB	BB	BB	BB	AA	AB	BB	AB	BB	BB	BB	AB	AB	AA	AB	AB	AB	AA	BB	AA	AB	AA	AB	BB	BB	AB	AB	AB	AB
801	tig00004411	tig00004411_683628	1	30.817	30.817	AB	AB	BB	AA	AA	AB	BB	AB	BB	AB	AB	AB	AA	AB	AB	AB	BB	BB	BB	AA	AB	BB	AB	BB	BB	BB	AB	AB	AA	AB	AB	AB	AA	BB	AB	AB	AA	AB	BB	BB	AB	AB	AB	AB
802	tig00004411	tig00004411_683650	1	31.488	31.488	AB	AB	BB	AA	AA	AB	BB	AB	BB	AB	AB	AB	AA	AB	AB	AB	BB	BB	BB	AA	AB	BB	AB	BB	BB	BB	AB	AB	AA	AB	AB	AB	AA	BB	BB	AB	AA	AB	BB	BB	AB	AB	AB	AB
803	tig00004411	tig00004411_696371	1	30.817	30.817	AB	AB	BB	AA	AA	AB	BB	AB	BB	AB	AB	AB	AA	AB	AB	AB	BB	BB	BB	AA	AB	BB	AB	BB	BB	BB	AB	AB	AA	AB	AB	AB	AA	BB	AB	AB	AA	AB	BB	BB	AB	AB	AB	AB
804	tig00004411	tig00004411_745789	1	31.488	31.488	AB	AB	BB	AA	AA	AB	BB	AB	BB	AB	AB	AB	AA	AB	AB	AB	BB	BB	BB	AA	AB	BB	AB	BB	BB	BB	AB	AB	AA	AB	AB	AB	AA	BB	BB	AB	AA	AB	BB	BB	AB	AB	AB	AB
805	tig00004411	tig00004411_745949	1	31.488	31.488	AB	AB	BB	AA	AA	AB	BB	AB	BB	AB	AB	AB	AA	AB	AB	AB	BB	BB	BB	AA	AB	BB	AB	BB	BB	BB	AB	AB	AA	AB	AB	AB	AA	BB	BB	AB	AA	AB	BB	BB	AB	AB	AB	AB
806	tig00004411	tig00004411_745953	1	31.488	31.488	AB	AB	BB	AA	AA	AB	BB	AB	BB	AB	AB	AB	AA	AB	AB	AB	BB	BB	BB	AA	AB	BB	AB	BB	BB	BB	AB	AB	AA	AB	AB	AB	AA	BB	BB	AB	AA	AB	BB	BB	AB	AB	AB	AB
808	tig00004411	tig00004411_746869	1	31.488	31.488	AB	AB	BB	AA	AA	AB	BB	AB	BB	AB	AB	AB	AA	AB	AB	AB	BB	BB	BB	AA	AB	BB	AB	BB	BB	BB	AB	AB	AA	AB	AB	AB	AA	BB	BB	AB	AA	AB	BB	BB	AB	AB	AB	AB
810	tig00004411	tig00004411_749348	1	31.488	31.488	AB	AB	BB	AA	AA	AB	BB	AB	BB	AB	AB	AB	AA	AB	AB	AB	BB	BB	BB	AA	AB	BB	AB	BB	BB	BB	AB	AB	AA	AB	AB	AB	AA	BB	BB	AB	AA	AB	BB	BB	AB	AB	AB	AB
812	tig00004411	tig00004411_765728	1	31.488	31.488	AB	AB	BB	AA	AA	AB	BB	AB	BB	AB	AB	AB	AA	AB	AB	AB	BB	BB	BB	AA	AB	BB	AB	BB	BB	BB	AB	AB	AA	AB	AB	AB	AA	BB	BB	AB	AA	AB	BB	BB	AB	AB	AB	AB
813	tig00004411	tig00004411_765776	1	31.488	31.488	AB	AB	BB	AA	AA	AB	BB	AB	BB	AB	AB	AB	AA	AB	AB	AB	BB	BB	BB	AA	AB	BB	AB	BB	BB	BB	AB	AB	AA	AB	AB	AB	AA	BB	BB	AB	AA	AB	BB	BB	AB	AB	AB	AB
814	tig00004411	tig00004411_770755	1	31.488	31.488	AB	AB	BB	AA	AA	AB	BB	AB	BB	AB	AB	AB	AA	AB	AB	AB	BB	BB	BB	AA	AB	BB	AB	BB	BB	BB	AB	AB	AA	AB	AB	AB	AA	BB	BB	AB	AA	AB	BB	BB	AB	AB	AB	AB
815	tig00004411	tig00004411_771799	1	31.488	31.488	AB	AB	BB	AA	AA	AB	BB	AB	BB	AB	AB	AB	AA	AB	AB	AB	BB	BB	BB	AA	AB	BB	AB	BB	BB	BB	AB	AB	AA	AB	AB	AB	AA	BB	BB	AB	AA	AB	BB	BB	AB	AB	AB	AB
816	tig00004411	tig00004411_771800	1	31.488	31.488	AB	AB	BB	AA	AA	AB	BB	AB	BB	AB	AB	AB	AA	AB	AB	AB	BB	BB	BB	AA	AB	BB	AB	BB	BB	BB	AB	AB	AA	AB	AB	AB	AA	BB	BB	AB	AA	AB	BB	BB	AB	AB	AB	AB
817	tig00004411	tig00004411_771839	1	31.488	31.488	AB	AB	BB	AA	AA	AB	BB	AB	BB	AB	AB	AB	AA	AB	AB	AB	BB	BB	BB	AA	AB	BB	AB	BB	BB	BB	AB	AB	AA	AB	AB	AB	AA	BB	BB	AB	AA	AB	BB	BB	AB	AB	AB	AB
818	tig00004411	tig00004411_771875	1	31.488	31.488	AB	AB	BB	AA	AA	AB	BB	AB	BB	AB	AB	AB	AA	AB	AB	AB	BB	BB	BB	AA	AB	BB	AB	BB	BB	BB	AB	AB	AA	AB	AB	AB	AA	BB	BB	AB	AA	AB	BB	BB	AB	AB	AB	AB
819	tig00004411	tig00004411_771951	1	31.488	31.488	AB	AB	BB	AA	AA	AB	BB	AB	BB	AB	AB	AB	AA	AB	AB	AB	BB	BB	BB	AA	AB	BB	AB	BB	BB	BB	AB	AB	AA	AB	AB	AB	AA	BB	BB	AB	AA	AB	BB	BB	AB	AB	AB	AB
820	tig00004411	tig00004411_778967	1	31.488	31.488	AB	AB	BB	AA	AA	AB	BB	AB	BB	AB	AB	AB	AA	AB	AB	AB	BB	BB	BB	AA	AB	BB	AB	BB	BB	BB	AB	AB	AA	AB	AB	AB	AA	BB	BB	AB	AA	AB	BB	BB	AB	AB	AB	AB
821	tig00004411	tig00004411_778972	1	31.488	31.488	AB	AB	BB	AA	AA	AB	BB	AB	BB	AB	AB	AB	AA	AB	AB	AB	BB	BB	BB	AA	AB	BB	AB	BB	BB	BB	AB	AB	AA	AB	AB	AB	AA	BB	BB	AB	AA	AB	BB	BB	AB	AB	AB	AB
822	tig00004411	tig00004411_782760	1	31.488	31.488	AB	AB	BB	AA	AA	AB	BB	AB	BB	AB	AB	AB	AA	AB	AB	AB	BB	BB	BB	AA	AB	BB	AB	BB	BB	BB	AB	AB	AA	AB	AB	AB	AA	BB	BB	AB	AA	AB	BB	BB	AB	AB	AB	AB
823	tig00004411	tig00004411_782766	1	31.488	31.488	AB	AB	BB	AA	AA	AB	BB	AB	BB	AB	AB	AB	AA	AB	AB	AB	BB	BB	BB	AA	AB	BB	AB	BB	BB	BB	AB	AB	AA	AB	AB	AB	AA	BB	BB	AB	AA	AB	BB	BB	AB	AB	AB	AB
826	tig00004411	tig00004411_784566	1	31.488	31.488	AB	AB	BB	AA	AA	AB	BB	AB	BB	AB	AB	AB	AA	AB	AB	AB	BB	BB	BB	AA	AB	BB	AB	BB	BB	BB	AB	AB	AA	AB	AB	AB	AA	BB	BB	AB	AA	AB	BB	BB	AB	AB	AB	AB
827	tig00004411	tig00004411_784613	1	31.488	31.488	AB	AB	BB	AA	AA	AB	BB	AB	BB	AB	AB	AB	AA	AB	AB	AB	BB	BB	BB	AA	AB	BB	AB	BB	BB	BB	AB	AB	AA	AB	AB	AB	AA	BB	BB	AB	AA	AB	BB	BB	AB	AB	AB	AB
828	tig00004411	tig00004411_784780	1	31.488	31.488	AB	AB	BB	AA	AA	AB	BB	AB	BB	AB	AB	AB	AA	AB	AB	AB	BB	BB	BB	AA	AB	BB	AB	BB	BB	BB	AB	AB	AA	AB	AB	AB	AA	BB	BB	AB	AA	AB	BB	BB	AB	AB	AB	AB
831	tig00004411	tig00004411_784855	1	31.488	31.488	AB	AB	BB	AA	AA	AB	BB	AB	BB	AB	AB	AB	AA	AB	AB	AB	BB	BB	BB	AA	AB	BB	AB	BB	BB	BB	AB	AB	AA	AB	AB	AB	AA	BB	BB	AB	AA	AB	BB	BB	AB	AB	AB	AB
832	tig00004411	tig00004411_784875	1	31.488	31.488	AB	AB	BB	AA	AA	AB	BB	AB	BB	AB	AB	AB	AA	AB	AB	AB	BB	BB	BB	AA	AB	BB	AB	BB	BB	BB	AB	AB	AA	AB	AB	AB	AA	BB	BB	AB	AA	AB	BB	BB	AB	AB	AB	AB
833	tig00004411	tig00004411_784970	1	31.488	31.488	AB	AB	BB	AA	AA	AB	BB	AB	BB	AB	AB	AB	AA	AB	AB	AB	BB	BB	BB	AA	AB	BB	AB	BB	BB	BB	AB	AB	AA	AB	AB	AB	AA	BB	BB	AB	AA	AB	BB	BB	AB	AB	AB	AB
834	tig00004411	tig00004411_791077	1	31.488	31.488	AB	AB	BB	AA	AA	AB	BB	AB	BB	AB	AB	AB	AA	AB	AB	AB	BB	BB	BB	AA	AB	BB	AB	BB	BB	BB	AB	AB	AA	AB	AB	AB	AA	BB	BB	AB	AA	AB	BB	BB	AB	AB	AB	AB
835	tig00004411	tig00004411_792055	1	31.488	31.488	AB	AB	BB	AA	AA	AB	BB	AB	BB	AB	AB	AB	AA	AB	AB	AB	BB	BB	BB	AA	AB	BB	AB	BB	BB	BB	AB	AB	AA	AB	AB	AB	AA	BB	BB	AB	AA	AB	BB	BB	AB	AB	AB	AB
836	tig00004411	tig00004411_792066	1	31.488	31.488	AB	AB	BB	AA	AA	AB	BB	AB	BB	AB	AB	AB	AA	AB	AB	AB	BB	BB	BB	AA	AB	BB	AB	BB	BB	BB	AB	AB	AA	AB	AB	AB	AA	BB	BB	AB	AA	AB	BB	BB	AB	AB	AB	AB
837	tig00004411	tig00004411_792071	1	31.488	31.488	AB	AB	BB	AA	AA	AB	BB	AB	BB	AB	AB	AB	AA	AB	AB	AB	BB	BB	BB	AA	AB	BB	AB	BB	BB	BB	AB	AB	AA	AB	AB	AB	AA	BB	BB	AB	AA	AB	BB	BB	AB	AB	AB	AB
838	tig00004411	tig00004411_792080	1	31.488	31.488	AB	AB	BB	AA	AA	AB	BB	AB	BB	AB	AB	AB	AA	AB	AB	AB	BB	BB	BB	AA	AB	BB	AB	BB	BB	BB	AB	AB	AA	AB	AB	AB	AA	BB	BB	AB	AA	AB	BB	BB	AB	AB	AB	AB
839	tig00004411	tig00004411_808868	1	31.488	31.488	AB	AB	BB	AA	AA	AB	BB	AB	BB	AB	AB	AB	AA	AB	AB	AB	BB	BB	BB	AA	AB	BB	AB	BB	BB	BB	AB	AB	AA	AB	AB	AB	AA	BB	BB	AB	AA	AB	BB	BB	AB	AB	AB	AB
840	tig00004411	tig00004411_808951	1	31.488	31.488	AB	AB	BB	AA	AA	AB	BB	AB	BB	AB	AB	AB	AA	AB	AB	AB	BB	BB	BB	AA	AB	BB	AB	BB	BB	BB	AB	AB	AA	AB	AB	AB	AA	BB	BB	AB	AA	AB	BB	BB	AB	AB	AB	AB
841	tig00004411	tig00004411_812759	1	31.488	31.488	AB	AB	BB	AA	AA	AB	BB	AB	BB	AB	AB	AB	AA	AB	AB	AB	BB	BB	BB	AA	AB	BB	AB	BB	BB	BB	AB	AB	AA	AB	AB	AB	AA	BB	BB	AB	AA	AB	BB	BB	AB	AB	AB	AB
842	tig00004411	tig00004411_816280	1	31.488	31.488	AB	AB	BB	AA	AA	AB	BB	AB	BB	AB	AB	AB	AA	AB	AB	AB	BB	BB	BB	AA	AB	BB	AB	BB	BB	BB	AB	AB	AA	AB	AB	AB	AA	BB	BB	AB	AA	AB	BB	BB	AB	AB	AB	AB
843	tig00004411	tig00004411_816753	1	31.488	31.488	AB	AB	BB	AA	AA	AB	BB	AB	BB	AB	AB	AB	AA	AB	AB	AB	BB	BB	BB	AA	AB	BB	AB	BB	BB	BB	AB	AB	AA	AB	AB	AB	AA	BB	BB	AB	AA	AB	BB	BB	AB	AB	AB	AB
844	tig00004411	tig00004411_817460	1	31.488	31.488	AB	AB	BB	AA	AA	AB	BB	AB	BB	AB	AB	AB	AA	AB	AB	AB	BB	BB	BB	AA	AB	BB	AB	BB	BB	BB	AB	AB	AA	AB	AB	AB	AA	BB	BB	AB	AA	AB	BB	BB	AB	AB	AB	AB
845	tig00004411	tig00004411_818107	1	31.488	31.488	AB	AB	BB	AA	AA	AB	BB	AB	BB	AB	AB	AB	AA	AB	AB	AB	BB	BB	BB	AA	AB	BB	AB	BB	BB	BB	AB	AB	AA	AB	AB	AB	AA	BB	BB	AB	AA	AB	BB	BB	AB	AB	AB	AB
846	tig00004411	tig00004411_820964	1	31.488	31.488	AB	AB	BB	AA	AA	AB	BB	AB	BB	AB	AB	AB	AA	AB	AB	AB	BB	BB	BB	AA	AB	BB	AB	BB	BB	BB	AB	AB	AA	AB	AB	AB	AA	BB	BB	AB	AA	AB	BB	BB	AB	AB	AB	AB
847	tig00004411	tig00004411_821040	1	31.488	31.488	AB	AB	BB	AA	AA	AB	BB	AB	BB	AB	AB	AB	AA	AB	AB	AB	BB	BB	BB	AA	AB	BB	AB	BB	BB	BB	AB	AB	AA	AB	AB	AB	AA	BB	BB	AB	AA	AB	BB	BB	AB	AB	AB	AB
848	tig00004411	tig00004411_821286	1	31.488	31.488	AB	AB	BB	AA	AA	AB	BB	AB	BB	AB	AB	AB	AA	AB	AB	AB	BB	BB	BB	AA	AB	BB	AB	BB	BB	BB	AB	AB	AA	AB	AB	AB	AA	BB	BB	AB	AA	AB	BB	BB	AB	AB	AB	AB
849	tig00004411	tig00004411_821295	1	31.488	31.488	AB	AB	BB	AA	AA	AB	BB	AB	BB	AB	AB	AB	AA	AB	AB	AB	BB	BB	BB	AA	AB	BB	AB	BB	BB	BB	AB	AB	AA	AB	AB	AB	AA	BB	BB	AB	AA	AB	BB	BB	AB	AB	AB	AB
850	tig00004411	tig00004411_823065	1	31.488	31.488	AB	AB	BB	AA	AA	AB	BB	AB	BB	AB	AB	AB	AA	AB	AB	AB	BB	BB	BB	AA	AB	BB	AB	BB	BB	BB	AB	AB	AA	AB	AB	AB	AA	BB	BB	AB	AA	AB	BB	BB	AB	AB	AB	AB
851	tig00004411	tig00004411_823866	1	31.488	31.488	AB	AB	BB	AA	AA	AB	BB	AB	BB	AB	AB	AB	AA	AB	AB	AB	BB	BB	BB	AA	AB	BB	AB	BB	BB	BB	AB	AB	AA	AB	AB	AB	AA	BB	BB	AB	AA	AB	BB	BB	AB	AB	AB	AB
852	tig00004411	tig00004411_824002	1	31.488	31.488	AB	AB	BB	AA	AA	AB	BB	AB	BB	AB	AB	AB	AA	AB	AB	AB	BB	BB	BB	AA	AB	BB	AB	BB	BB	BB	AB	AB	AA	AB	AB	AB	AA	BB	BB	AB	AA	AB	BB	BB	AB	AB	AB	AB
853	tig00004411	tig00004411_824006	1	31.488	31.488	AB	AB	BB	AA	AA	AB	BB	AB	BB	AB	AB	AB	AA	AB	AB	AB	BB	BB	BB	AA	AB	BB	AB	BB	BB	BB	AB	AB	AA	AB	AB	AB	AA	BB	BB	AB	AA	AB	BB	BB	AB	AB	AB	AB
854	tig00004411	tig00004411_824012	1	31.488	31.488	AB	AB	BB	AA	AA	AB	BB	AB	BB	AB	AB	AB	AA	AB	AB	AB	BB	BB	BB	AA	AB	BB	AB	BB	BB	BB	AB	AB	AA	AB	AB	AB	AA	BB	BB	AB	AA	AB	BB	BB	AB	AB	AB	AB
855	tig00004411	tig00004411_824210	1	31.488	31.488	AB	AB	BB	AA	AA	AB	BB	AB	BB	AB	AB	AB	AA	AB	AB	AB	BB	BB	BB	AA	AB	BB	AB	BB	BB	BB	AB	AB	AA	AB	AB	AB	AA	BB	BB	AB	AA	AB	BB	BB	AB	AB	AB	AB
856	tig00004411	tig00004411_824311	1	31.488	31.488	AB	AB	BB	AA	AA	AB	BB	AB	BB	AB	AB	AB	AA	AB	AB	AB	BB	BB	BB	AA	AB	BB	AB	BB	BB	BB	AB	AB	AA	AB	AB	AB	AA	BB	BB	AB	AA	AB	BB	BB	AB	AB	AB	AB
857	tig00004411	tig00004411_824320	1	31.488	31.488	AB	AB	BB	AA	AA	AB	BB	AB	BB	AB	AB	AB	AA	AB	AB	AB	BB	BB	BB	AA	AB	BB	AB	BB	BB	BB	AB	AB	AA	AB	AB	AB	AA	BB	BB	AB	AA	AB	BB	BB	AB	AB	AB	AB
858	tig00004411	tig00004411_830841	1	31.488	31.488	AB	AB	BB	AA	AA	AB	BB	AB	BB	AB	AB	AB	AA	AB	AB	AB	BB	BB	BB	AA	AB	BB	AB	BB	BB	BB	AB	AB	AA	AB	AB	AB	AA	BB	BB	AB	AA	AB	BB	BB	AB	AB	AB	AB
859	tig00004411	tig00004411_832733	1	31.488	31.488	AB	AB	BB	AA	AA	AB	BB	AB	BB	AB	AB	AB	AA	AB	AB	AB	BB	BB	BB	AA	AB	BB	AB	BB	BB	BB	AB	AB	AA	AB	AB	AB	AA	BB	BB	AB	AA	AB	BB	BB	AB	AB	AB	AB
860	tig00004411	tig00004411_832747	1	31.488	31.488	AB	AB	BB	AA	AA	AB	BB	AB	BB	AB	AB	AB	AA	AB	AB	AB	BB	BB	BB	AA	AB	BB	AB	BB	BB	BB	AB	AB	AA	AB	AB	AB	AA	BB	BB	AB	AA	AB	BB	BB	AB	AB	AB	AB
861	tig00004411	tig00004411_833752	1	30.817	30.817	AB	AB	BB	AA	AA	AB	BB	AB	BB	AB	AB	AB	AA	AB	AB	AB	BB	BB	BB	AA	AB	BB	AB	BB	BB	BB	AB	AB	AA	AB	AB	AB	AA	BB	AB	AB	AA	AB	BB	BB	AB	AB	AB	AB
862	tig00004411	tig00004411_833862	1	30.817	30.817	AB	AB	BB	AA	AA	AB	BB	AB	BB	AB	AB	AB	AA	AB	AB	AB	BB	BB	BB	AA	AB	BB	AB	BB	BB	BB	AB	AB	AA	AB	AB	AB	AA	BB	AB	AB	AA	AB	BB	BB	AB	AB	AB	AB
863	tig00004411	tig00004411_833927	1	30.817	30.817	AB	AB	BB	AA	AA	AB	BB	AB	BB	AB	AB	AB	AA	AB	AB	AB	BB	BB	BB	AA	AB	BB	AB	BB	BB	BB	AB	AB	AA	AB	AB	AB	AA	BB	AB	AB	AA	AB	BB	BB	AB	AB	AB	AB
864	tig00004411	tig00004411_835879	1	31.488	31.488	AB	AB	BB	AA	AA	AB	BB	AB	BB	AB	AB	AB	AA	AB	AB	AB	BB	BB	BB	AA	AB	BB	AB	BB	BB	BB	AB	AB	AA	AB	AB	AB	AA	BB	BB	AB	AA	AB	BB	BB	AB	AB	AB	AB
865	tig00004411	tig00004411_835906	1	31.488	31.488	AB	AB	BB	AA	AA	AB	BB	AB	BB	AB	AB	AB	AA	AB	AB	AB	BB	BB	BB	AA	AB	BB	AB	BB	BB	BB	AB	AB	AA	AB	AB	AB	AA	BB	BB	AB	AA	AB	BB	BB	AB	AB	AB	AB
866	tig00004411	tig00004411_835907	1	31.488	31.488	AB	AB	BB	AA	AA	AB	BB	AB	BB	AB	AB	AB	AA	AB	AB	AB	BB	BB	BB	AA	AB	BB	AB	BB	BB	BB	AB	AB	AA	AB	AB	AB	AA	BB	BB	AB	AA	AB	BB	BB	AB	AB	AB	AB
867	tig00004411	tig00004411_836143	1	31.488	31.488	AB	AB	BB	AA	AA	AB	BB	AB	BB	AB	AB	AB	AA	AB	AB	AB	BB	BB	BB	AA	AB	BB	AB	BB	BB	BB	AB	AB	AA	AB	AB	AB	AA	BB	BB	AB	AA	AB	BB	BB	AB	AB	AB	AB
868	tig00004411	tig00004411_839059	1	31.488	31.488	AB	AB	BB	AA	AA	AB	BB	AB	BB	AB	AB	AB	AA	AB	AB	AB	BB	BB	BB	AA	AB	BB	AB	BB	BB	BB	AB	AB	AA	AB	AB	AB	AA	BB	BB	AB	AA	AB	BB	BB	AB	AB	AB	AB
869	tig00004411	tig00004411_839830	1	31.488	31.488	AB	AB	BB	AA	AA	AB	BB	AB	BB	AB	AB	AB	AA	AB	AB	AB	BB	BB	BB	AA	AB	BB	AB	BB	BB	BB	AB	AB	AA	AB	AB	AB	AA	BB	BB	AB	AA	AB	BB	BB	AB	AB	AB	AB
870	tig00004411	tig00004411_845102	1	31.488	31.488	AB	AB	BB	AA	AA	AB	BB	AB	BB	AB	AB	AB	AA	AB	AB	AB	BB	BB	BB	AA	AB	BB	AB	BB	BB	BB	AB	AB	AA	AB	AB	AB	AA	BB	BB	AB	AA	AB	BB	BB	AB	AB	AB	AB
871	tig00004411	tig00004411_845175	1	31.488	31.488	AB	AB	BB	AA	AA	AB	BB	AB	BB	AB	AB	AB	AA	AB	AB	AB	BB	BB	BB	AA	AB	BB	AB	BB	BB	BB	AB	AB	AA	AB	AB	AB	AA	BB	BB	AB	AA	AB	BB	BB	AB	AB	AB	AB
872	tig00004411	tig00004411_845176	1	31.488	31.488	AB	AB	BB	AA	AA	AB	BB	AB	BB	AB	AB	AB	AA	AB	AB	AB	BB	BB	BB	AA	AB	BB	AB	BB	BB	BB	AB	AB	AA	AB	AB	AB	AA	BB	BB	AB	AA	AB	BB	BB	AB	AB	AB	AB
873	tig00004411	tig00004411_846531	1	31.488	31.488	AB	AB	BB	AA	AA	AB	BB	AB	BB	AB	AB	AB	AA	AB	AB	AB	BB	BB	BB	AA	AB	BB	AB	BB	BB	BB	AB	AB	AA	AB	AB	AB	AA	BB	BB	AB	AA	AB	BB	BB	AB	AB	AB	AB
874	tig00004411	tig00004411_850282	1	31.488	31.488	AB	AB	BB	AA	AA	AB	BB	AB	BB	AB	AB	AB	AA	AB	AB	AB	BB	BB	BB	AA	AB	BB	AB	BB	BB	BB	AB	AB	AA	AB	AB	AB	AA	BB	BB	AB	AA	AB	BB	BB	AB	AB	AB	AB
875	tig00004411	tig00004411_850878	1	31.488	31.488	AB	AB	BB	AA	AA	AB	BB	AB	BB	AB	AB	AB	AA	AB	AB	AB	BB	BB	BB	AA	AB	BB	AB	BB	BB	BB	AB	AB	AA	AB	AB	AB	AA	BB	BB	AB	AA	AB	BB	BB	AB	AB	AB	AB
876	tig00004411	tig00004411_850879	1	31.488	31.488	AB	AB	BB	AA	AA	AB	BB	AB	BB	AB	AB	AB	AA	AB	AB	AB	BB	BB	BB	AA	AB	BB	AB	BB	BB	BB	AB	AB	AA	AB	AB	AB	AA	BB	BB	AB	AA	AB	BB	BB	AB	AB	AB	AB
877	tig00004411	tig00004411_851002	1	31.488	31.488	AB	AB	BB	AA	AA	AB	BB	AB	BB	AB	AB	AB	AA	AB	AB	AB	BB	BB	BB	AA	AB	BB	AB	BB	BB	BB	AB	AB	AA	AB	AB	AB	AA	BB	BB	AB	AA	AB	BB	BB	AB	AB	AB	AB
878	tig00004411	tig00004411_854919	1	31.488	31.488	AB	AB	BB	AA	AA	AB	BB	AB	BB	AB	AB	AB	AA	AB	AB	AB	BB	BB	BB	AA	AB	BB	AB	BB	BB	BB	AB	AB	AA	AB	AB	AB	AA	BB	BB	AB	AA	AB	BB	BB	AB	AB	AB	AB
879	tig00004411	tig00004411_855040	1	31.488	31.488	AB	AB	BB	AA	AA	AB	BB	AB	BB	AB	AB	AB	AA	AB	AB	AB	BB	BB	BB	AA	AB	BB	AB	BB	BB	BB	AB	AB	AA	AB	AB	AB	AA	BB	BB	AB	AA	AB	BB	BB	AB	AB	AB	AB
880	tig00004411	tig00004411_855041	1	31.488	31.488	AB	AB	BB	AA	AA	AB	BB	AB	BB	AB	AB	AB	AA	AB	AB	AB	BB	BB	BB	AA	AB	BB	AB	BB	BB	BB	AB	AB	AA	AB	AB	AB	AA	BB	BB	AB	AA	AB	BB	BB	AB	AB	AB	AB
881	tig00004411	tig00004411_856520	1	31.488	31.488	AB	AB	BB	AA	AA	AB	BB	AB	BB	AB	AB	AB	AA	AB	AB	AB	BB	BB	BB	AA	AB	BB	AB	BB	BB	BB	AB	AB	AA	AB	AB	AB	AA	BB	BB	AB	AA	AB	BB	BB	AB	AB	AB	AB
882	tig00004411	tig00004411_856523	1	31.488	31.488	AB	AB	BB	AA	AA	AB	BB	AB	BB	AB	AB	AB	AA	AB	AB	AB	BB	BB	BB	AA	AB	BB	AB	BB	BB	BB	AB	AB	AA	AB	AB	AB	AA	BB	BB	AB	AA	AB	BB	BB	AB	AB	AB	AB
883	tig00004411	tig00004411_863143	1	31.488	31.488	AB	AB	BB	AA	AA	AB	BB	AB	BB	AB	AB	AB	AA	AB	AB	AB	BB	BB	BB	AA	AB	BB	AB	BB	BB	BB	AB	AB	AA	AB	AB	AB	AA	BB	BB	AB	AA	AB	BB	BB	AB	AB	AB	AB
884	tig00004411	tig00004411_876954	1	31.488	31.488	AB	AB	BB	AA	AA	AB	BB	AB	BB	AB	AB	AB	AA	AB	AB	AB	BB	BB	BB	AA	AB	BB	AB	BB	BB	BB	AB	AB	AA	AB	AB	AB	AA	BB	BB	AB	AA	AB	BB	BB	AB	AB	AB	AB
885	tig00004411	tig00004411_877168	1	31.488	31.488	AB	AB	BB	AA	AA	AB	BB	AB	BB	AB	AB	AB	AA	AB	AB	AB	BB	BB	BB	AA	AB	BB	AB	BB	BB	BB	AB	AB	AA	AB	AB	AB	AA	BB	BB	AB	AA	AB	BB	BB	AB	AB	AB	AB
886	tig00004411	tig00004411_877258	1	31.488	31.488	AB	AB	BB	AA	AA	AB	BB	AB	BB	AB	AB	AB	AA	AB	AB	AB	BB	BB	BB	AA	AB	BB	AB	BB	BB	BB	AB	AB	AA	AB	AB	AB	AA	BB	BB	AB	AA	AB	BB	BB	AB	AB	AB	AB
887	tig00004411	tig00004411_877286	1	31.488	31.488	AB	AB	BB	AA	AA	AB	BB	AB	BB	AB	AB	AB	AA	AB	AB	AB	BB	BB	BB	AA	AB	BB	AB	BB	BB	BB	AB	AB	AA	AB	AB	AB	AA	BB	BB	AB	AA	AB	BB	BB	AB	AB	AB	AB
888	tig00004411	tig00004411_877616	1	31.488	31.488	AB	AB	BB	AA	AA	AB	BB	AB	BB	AB	AB	AB	AA	AB	AB	AB	BB	BB	BB	AA	AB	BB	AB	BB	BB	BB	AB	AB	AA	AB	AB	AB	AA	BB	BB	AB	AA	AB	BB	BB	AB	AB	AB	AB
889	tig00004411	tig00004411_877876	1	31.488	31.488	AB	AB	BB	AA	AA	AB	BB	AB	BB	AB	AB	AB	AA	AB	AB	AB	BB	BB	BB	AA	AB	BB	AB	BB	BB	BB	AB	AB	AA	AB	AB	AB	AA	BB	BB	AB	AA	AB	BB	BB	AB	AB	AB	AB
890	tig00004411	tig00004411_879780	1	31.488	31.488	AB	AB	BB	AA	AA	AB	BB	AB	BB	AB	AB	AB	AA	AB	AB	AB	BB	BB	BB	AA	AB	BB	AB	BB	BB	BB	AB	AB	AA	AB	AB	AB	AA	BB	BB	AB	AA	AB	BB	BB	AB	AB	AB	AB
891	tig00004411	tig00004411_880597	1	31.488	31.488	AB	AB	BB	AA	AA	AB	BB	AB	BB	AB	AB	AB	AA	AB	AB	AB	BB	BB	BB	AA	AB	BB	AB	BB	BB	BB	AB	AB	AA	AB	AB	AB	AA	BB	BB	AB	AA	AB	BB	BB	AB	AB	AB	AB
892	tig00004411	tig00004411_880717	1	31.488	31.488	AB	AB	BB	AA	AA	AB	BB	AB	BB	AB	AB	AB	AA	AB	AB	AB	BB	BB	BB	AA	AB	BB	AB	BB	BB	BB	AB	AB	AA	AB	AB	AB	AA	BB	BB	AB	AA	AB	BB	BB	AB	AB	AB	AB
893	tig00004411	tig00004411_880918	1	31.488	31.488	AB	AB	BB	AA	AA	AB	BB	AB	BB	AB	AB	AB	AA	AB	AB	AB	BB	BB	BB	AA	AB	BB	AB	BB	BB	BB	AB	AB	AA	AB	AB	AB	AA	BB	BB	AB	AA	AB	BB	BB	AB	AB	AB	AB
894	tig00004411	tig00004411_880919	1	31.488	31.488	AB	AB	BB	AA	AA	AB	BB	AB	BB	AB	AB	AB	AA	AB	AB	AB	BB	BB	BB	AA	AB	BB	AB	BB	BB	BB	AB	AB	AA	AB	AB	AB	AA	BB	BB	AB	AA	AB	BB	BB	AB	AB	AB	AB
895	tig00004411	tig00004411_880948	1	31.488	31.488	AB	AB	BB	AA	AA	AB	BB	AB	BB	AB	AB	AB	AA	AB	AB	AB	BB	BB	BB	AA	AB	BB	AB	BB	BB	BB	AB	AB	AA	AB	AB	AB	AA	BB	BB	AB	AA	AB	BB	BB	AB	AB	AB	AB
896	tig00004411	tig00004411_883058	1	31.488	31.488	AB	AB	BB	AA	AA	AB	BB	AB	BB	AB	AB	AB	AA	AB	AB	AB	BB	BB	BB	AA	AB	BB	AB	BB	BB	BB	AB	AB	AA	AB	AB	AB	AA	BB	BB	AB	AA	AB	BB	BB	AB	AB	AB	AB
897	tig00004411	tig00004411_883156	1	31.488	31.488	AB	AB	BB	AA	AA	AB	BB	AB	BB	AB	AB	AB	AA	AB	AB	AB	BB	BB	BB	AA	AB	BB	AB	BB	BB	BB	AB	AB	AA	AB	AB	AB	AA	BB	BB	AB	AA	AB	BB	BB	AB	AB	AB	AB
898	tig00004411	tig00004411_890078	1	31.488	31.488	AB	AB	BB	AA	AA	AB	BB	AB	BB	AB	AB	AB	AA	AB	AB	AB	BB	BB	BB	AA	AB	BB	AB	BB	BB	BB	AB	AB	AA	AB	AB	AB	AA	BB	BB	AB	AA	AB	BB	BB	AB	AB	AB	AB
900	tig00004411	tig00004411_892293	1	31.488	31.488	AB	AB	BB	AA	AA	AB	BB	AB	BB	AB	AB	AB	AA	AB	AB	AB	BB	BB	BB	AA	AB	BB	AB	BB	BB	BB	AB	AB	AA	AB	AB	AB	AA	BB	BB	AB	AA	AB	BB	BB	AB	AB	AB	AB
902	tig00004411	tig00004411_892650	1	31.488	31.488	AB	AB	BB	AA	AA	AB	BB	AB	BB	AB	AB	AB	AA	AB	AB	AB	BB	BB	BB	AA	AB	BB	AB	BB	BB	BB	AB	AB	AA	AB	AB	AB	AA	BB	BB	AB	AA	AB	BB	BB	AB	AB	AB	AB
903	tig00004411	tig00004411_892878	1	31.488	31.488	AB	AB	BB	AA	AA	AB	BB	AB	BB	AB	AB	AB	AA	AB	AB	AB	BB	BB	BB	AA	AB	BB	AB	BB	BB	BB	AB	AB	AA	AB	AB	AB	AA	BB	BB	AB	AA	AB	BB	BB	AB	AB	AB	AB
905	tig00004411	tig00004411_893053	1	31.488	31.488	AB	AB	BB	AA	AA	AB	BB	AB	BB	AB	AB	AB	AA	AB	AB	AB	BB	BB	BB	AA	AB	BB	AB	BB	BB	BB	AB	AB	AA	AB	AB	AB	AA	BB	BB	AB	AA	AB	BB	BB	AB	AB	AB	AB
906	tig00004411	tig00004411_893180	1	31.488	31.488	AB	AB	BB	AA	AA	AB	BB	AB	BB	AB	AB	AB	AA	AB	AB	AB	BB	BB	BB	AA	AB	BB	AB	BB	BB	BB	AB	AB	AA	AB	AB	AB	AA	BB	BB	AB	AA	AB	BB	BB	AB	AB	AB	AB
907	tig00004411	tig00004411_893181	1	31.488	31.488	AB	AB	BB	AA	AA	AB	BB	AB	BB	AB	AB	AB	AA	AB	AB	AB	BB	BB	BB	AA	AB	BB	AB	BB	BB	BB	AB	AB	AA	AB	AB	AB	AA	BB	BB	AB	AA	AB	BB	BB	AB	AB	AB	AB
908	tig00004411	tig00004411_893554	1	31.488	31.488	AB	AB	BB	AA	AA	AB	BB	AB	BB	AB	AB	AB	AA	AB	AB	AB	BB	BB	BB	AA	AB	BB	AB	BB	BB	BB	AB	AB	AA	AB	AB	AB	AA	BB	BB	AB	AA	AB	BB	BB	AB	AB	AB	AB
910	tig00004411	tig00004411_894320	1	31.488	31.488	AB	AB	BB	AA	AA	AB	BB	AB	BB	AB	AB	AB	AA	AB	AB	AB	BB	BB	BB	AA	AB	BB	AB	BB	BB	BB	AB	AB	AA	AB	AB	AB	AA	BB	BB	AB	AA	AB	BB	BB	AB	AB	AB	AB
911	tig00004411	tig00004411_894425	1	31.488	31.488	AB	AB	BB	AA	AA	AB	BB	AB	BB	AB	AB	AB	AA	AB	AB	AB	BB	BB	BB	AA	AB	BB	AB	BB	BB	BB	AB	AB	AA	AB	AB	AB	AA	BB	BB	AB	AA	AB	BB	BB	AB	AB	AB	AB
912	tig00004411	tig00004411_894802	1	31.488	31.488	AB	AB	BB	AA	AA	AB	BB	AB	BB	AB	AB	AB	AA	AB	AB	AB	BB	BB	BB	AA	AB	BB	AB	BB	BB	BB	AB	AB	AA	AB	AB	AB	AA	BB	BB	AB	AA	AB	BB	BB	AB	AB	AB	AB
914	tig00004411	tig00004411_898141	1	31.488	31.488	AB	AB	BB	AA	AA	AB	BB	AB	BB	AB	AB	AB	AA	AB	AB	AB	BB	BB	BB	AA	AB	BB	AB	BB	BB	BB	AB	AB	AA	AB	AB	AB	AA	BB	BB	AB	AA	AB	BB	BB	AB	AB	AB	AB
915	tig00004411	tig00004411_899475	1	31.488	31.488	AB	AB	BB	AA	AA	AB	BB	AB	BB	AB	AB	AB	AA	AB	AB	AB	BB	BB	BB	AA	AB	BB	AB	BB	BB	BB	AB	AB	AA	AB	AB	AB	AA	BB	BB	AB	AA	AB	BB	BB	AB	AB	AB	AB
916	tig00004411	tig00004411_899488	1	31.488	31.488	AB	AB	BB	AA	AA	AB	BB	AB	BB	AB	AB	AB	AA	AB	AB	AB	BB	BB	BB	AA	AB	BB	AB	BB	BB	BB	AB	AB	AA	AB	AB	AB	AA	BB	BB	AB	AA	AB	BB	BB	AB	AB	AB	AB
917	tig00004411	tig00004411_900385	1	31.488	31.488	AB	AB	BB	AA	AA	AB	BB	AB	BB	AB	AB	AB	AA	AB	AB	AB	BB	BB	BB	AA	AB	BB	AB	BB	BB	BB	AB	AB	AA	AB	AB	AB	AA	BB	BB	AB	AA	AB	BB	BB	AB	AB	AB	AB
918	tig00004411	tig00004411_902705	1	31.488	31.488	AB	AB	BB	AA	AA	AB	BB	AB	BB	AB	AB	AB	AA	AB	AB	AB	BB	BB	BB	AA	AB	BB	AB	BB	BB	BB	AB	AB	AA	AB	AB	AB	AA	BB	BB	AB	AA	AB	BB	BB	AB	AB	AB	AB
919	tig00004411	tig00004411_902958	1	31.488	31.488	AB	AB	BB	AA	AA	AB	BB	AB	BB	AB	AB	AB	AA	AB	AB	AB	BB	BB	BB	AA	AB	BB	AB	BB	BB	BB	AB	AB	AA	AB	AB	AB	AA	BB	BB	AB	AA	AB	BB	BB	AB	AB	AB	AB
920	tig00004411	tig00004411_902962	1	31.488	31.488	AB	AB	BB	AA	AA	AB	BB	AB	BB	AB	AB	AB	AA	AB	AB	AB	BB	BB	BB	AA	AB	BB	AB	BB	BB	BB	AB	AB	AA	AB	AB	AB	AA	BB	BB	AB	AA	AB	BB	BB	AB	AB	AB	AB
921	tig00004411	tig00004411_903440	1	31.488	31.488	AB	AB	BB	AA	AA	AB	BB	AB	BB	AB	AB	AB	AA	AB	AB	AB	BB	BB	BB	AA	AB	BB	AB	BB	BB	BB	AB	AB	AA	AB	AB	AB	AA	BB	BB	AB	AA	AB	BB	BB	AB	AB	AB	AB
922	tig00004411	tig00004411_903790	1	31.488	31.488	AB	AB	BB	AA	AA	AB	BB	AB	BB	AB	AB	AB	AA	AB	AB	AB	BB	BB	BB	AA	AB	BB	AB	BB	BB	BB	AB	AB	AA	AB	AB	AB	AA	BB	BB	AB	AA	AB	BB	BB	AB	AB	AB	AB
923	tig00004411	tig00004411_903862	1	31.488	31.488	AB	AB	BB	AA	AA	AB	BB	AB	BB	AB	AB	AB	AA	AB	AB	AB	BB	BB	BB	AA	AB	BB	AB	BB	BB	BB	AB	AB	AA	AB	AB	AB	AA	BB	BB	AB	AA	AB	BB	BB	AB	AB	AB	AB
924	tig00004411	tig00004411_903889	1	31.488	31.488	AB	AB	BB	AA	AA	AB	BB	AB	BB	AB	AB	AB	AA	AB	AB	AB	BB	BB	BB	AA	AB	BB	AB	BB	BB	BB	AB	AB	AA	AB	AB	AB	AA	BB	BB	AB	AA	AB	BB	BB	AB	AB	AB	AB
925	tig00004411	tig00004411_904343	1	31.488	31.488	AB	AB	BB	AA	AA	AB	BB	AB	BB	AB	AB	AB	AA	AB	AB	AB	BB	BB	BB	AA	AB	BB	AB	BB	BB	BB	AB	AB	AA	AB	AB	AB	AA	BB	BB	AB	AA	AB	BB	BB	AB	AB	AB	AB
926	tig00004411	tig00004411_904586	1	31.488	31.488	AB	AB	BB	AA	AA	AB	BB	AB	BB	AB	AB	AB	AA	AB	AB	AB	BB	BB	BB	AA	AB	BB	AB	BB	BB	BB	AB	AB	AA	AB	AB	AB	AA	BB	BB	AB	AA	AB	BB	BB	AB	AB	AB	AB
927	tig00004411	tig00004411_904603	1	31.488	31.488	AB	AB	BB	AA	AA	AB	BB	AB	BB	AB	AB	AB	AA	AB	AB	AB	BB	BB	BB	AA	AB	BB	AB	BB	BB	BB	AB	AB	AA	AB	AB	AB	AA	BB	BB	AB	AA	AB	BB	BB	AB	AB	AB	AB
928	tig00004411	tig00004411_908770	1	30.817	30.817	AB	AB	BB	AA	AA	AB	BB	AB	BB	AB	AB	AB	AA	AB	AB	AB	BB	BB	BB	AA	AB	BB	AB	BB	BB	BB	AB	AB	AA	AB	AB	AB	AA	BB	AB	AB	AA	AB	BB	BB	AB	AB	AB	AB
929	tig00004411	tig00004411_908891	1	30.817	30.817	AB	AB	BB	AA	AA	AB	BB	AB	BB	AB	AB	AB	AA	AB	AB	AB	BB	BB	BB	AA	AB	BB	AB	BB	BB	BB	AB	AB	AA	AB	AB	AB	AA	BB	AB	AB	AA	AB	BB	BB	AB	AB	AB	AB
930	tig00004411	tig00004411_908901	1	30.817	30.817	AB	AB	BB	AA	AA	AB	BB	AB	BB	AB	AB	AB	AA	AB	AB	AB	BB	BB	BB	AA	AB	BB	AB	BB	BB	BB	AB	AB	AA	AB	AB	AB	AA	BB	AB	AB	AA	AB	BB	BB	AB	AB	AB	AB
932	tig00004411	tig00004411_909383	1	29.475	29.475	AB	AB	BB	AA	AA	AB	BB	AB	BB	AB	AB	AB	AA	AB	AB	AB	BB	BB	BB	AA	AB	BB	AB	BB	BB	BB	AB	AB	AA	AB	AB	AB	AA	BB	AA	AB	AA	AB	BB	BB	AB	AB	AB	AB
933	tig00004411	tig00004411_909389	1	29.475	29.475	AB	AB	BB	AA	AA	AB	BB	AB	BB	AB	AB	AB	AA	AB	AB	AB	BB	BB	BB	AA	AB	BB	AB	BB	BB	BB	AB	AB	AA	AB	AB	AB	AA	BB	AA	AB	AA	AB	BB	BB	AB	AB	AB	AB
936	tig00004411	tig00004411_909804	1	31.488	31.488	AB	AB	BB	AA	AA	AB	BB	AB	BB	AB	AB	AB	AA	AB	AB	AB	BB	BB	BB	AA	AB	BB	AB	BB	BB	BB	AB	AB	AA	AB	AB	AB	AA	BB	BB	AB	AA	AB	BB	BB	AB	AB	AB	AB
937	tig00004411	tig00004411_911316	1	31.488	31.488	AB	AB	BB	AA	AA	AB	BB	AB	BB	AB	AB	AB	AA	AB	AB	AB	BB	BB	BB	AA	AB	BB	AB	BB	BB	BB	AB	AB	AA	AB	AB	AB	AA	BB	BB	AB	AA	AB	BB	BB	AB	AB	AB	AB
938	tig00004411	tig00004411_911337	1	31.488	31.488	AB	AB	BB	AA	AA	AB	BB	AB	BB	AB	AB	AB	AA	AB	AB	AB	BB	BB	BB	AA	AB	BB	AB	BB	BB	BB	AB	AB	AA	AB	AB	AB	AA	BB	BB	AB	AA	AB	BB	BB	AB	AB	AB	AB
939	tig00004411	tig00004411_914033	1	31.488	31.488	AB	AB	BB	AA	AA	AB	BB	AB	BB	AB	AB	AB	AA	AB	AB	AB	BB	BB	BB	AA	AB	BB	AB	BB	BB	BB	AB	AB	AA	AB	AB	AB	AA	BB	BB	AB	AA	AB	BB	BB	AB	AB	AB	AB
940	tig00004411	tig00004411_914431	1	31.488	31.488	AB	AB	BB	AA	AA	AB	BB	AB	BB	AB	AB	AB	AA	AB	AB	AB	BB	BB	BB	AA	AB	BB	AB	BB	BB	BB	AB	AB	AA	AB	AB	AB	AA	BB	BB	AB	AA	AB	BB	BB	AB	AB	AB	AB
941	tig00004411	tig00004411_916050	1	31.488	31.488	AB	AB	BB	AA	AA	AB	BB	AB	BB	AB	AB	AB	AA	AB	AB	AB	BB	BB	BB	AA	AB	BB	AB	BB	BB	BB	AB	AB	AA	AB	AB	AB	AA	BB	BB	AB	AA	AB	BB	BB	AB	AB	AB	AB
942	tig00004411	tig00004411_916511	1	31.488	31.488	AB	AB	BB	AA	AA	AB	BB	AB	BB	AB	AB	AB	AA	AB	AB	AB	BB	BB	BB	AA	AB	BB	AB	BB	BB	BB	AB	AB	AA	AB	AB	AB	AA	BB	BB	AB	AA	AB	BB	BB	AB	AB	AB	AB
943	tig00004411	tig00004411_916619	1	31.488	31.488	AB	AB	BB	AA	AA	AB	BB	AB	BB	AB	AB	AB	AA	AB	AB	AB	BB	BB	BB	AA	AB	BB	AB	BB	BB	BB	AB	AB	AA	AB	AB	AB	AA	BB	BB	AB	AA	AB	BB	BB	AB	AB	AB	AB
944	tig00004411	tig00004411_917430	1	31.488	31.488	AB	AB	BB	AA	AA	AB	BB	AB	BB	AB	AB	AB	AA	AB	AB	AB	BB	BB	BB	AA	AB	BB	AB	BB	BB	BB	AB	AB	AA	AB	AB	AB	AA	BB	BB	AB	AA	AB	BB	BB	AB	AB	AB	AB
945	tig00004411	tig00004411_917597	1	31.488	31.488	AB	AB	BB	AA	AA	AB	BB	AB	BB	AB	AB	AB	AA	AB	AB	AB	BB	BB	BB	AA	AB	BB	AB	BB	BB	BB	AB	AB	AA	AB	AB	AB	AA	BB	BB	AB	AA	AB	BB	BB	AB	AB	AB	AB
946	tig00004411	tig00004411_917613	1	31.488	31.488	AB	AB	BB	AA	AA	AB	BB	AB	BB	AB	AB	AB	AA	AB	AB	AB	BB	BB	BB	AA	AB	BB	AB	BB	BB	BB	AB	AB	AA	AB	AB	AB	AA	BB	BB	AB	AA	AB	BB	BB	AB	AB	AB	AB
947	tig00004411	tig00004411_917618	1	31.488	31.488	AB	AB	BB	AA	AA	AB	BB	AB	BB	AB	AB	AB	AA	AB	AB	AB	BB	BB	BB	AA	AB	BB	AB	BB	BB	BB	AB	AB	AA	AB	AB	AB	AA	BB	BB	AB	AA	AB	BB	BB	AB	AB	AB	AB
948	tig00004411	tig00004411_917674	1	31.488	31.488	AB	AB	BB	AA	AA	AB	BB	AB	BB	AB	AB	AB	AA	AB	AB	AB	BB	BB	BB	AA	AB	BB	AB	BB	BB	BB	AB	AB	AA	AB	AB	AB	AA	BB	BB	AB	AA	AB	BB	BB	AB	AB	AB	AB
949	tig00004411	tig00004411_917844	1	31.488	31.488	AB	AB	BB	AA	AA	AB	BB	AB	BB	AB	AB	AB	AA	AB	AB	AB	BB	BB	BB	AA	AB	BB	AB	BB	BB	BB	AB	AB	AA	AB	AB	AB	AA	BB	BB	AB	AA	AB	BB	BB	AB	AB	AB	AB
950	tig00004411	tig00004411_917866	1	31.488	31.488	AB	AB	BB	AA	AA	AB	BB	AB	BB	AB	AB	AB	AA	AB	AB	AB	BB	BB	BB	AA	AB	BB	AB	BB	BB	BB	AB	AB	AA	AB	AB	AB	AA	BB	BB	AB	AA	AB	BB	BB	AB	AB	AB	AB
951	tig00004411	tig00004411_920456	1	31.488	31.488	AB	AB	BB	AA	AA	AB	BB	AB	BB	AB	AB	AB	AA	AB	AB	AB	BB	BB	BB	AA	AB	BB	AB	BB	BB	BB	AB	AB	AA	AB	AB	AB	AA	BB	BB	AB	AA	AB	BB	BB	AB	AB	AB	AB
952	tig00004411	tig00004411_923031	1	31.488	31.488	AB	AB	BB	AA	AA	AB	BB	AB	BB	AB	AB	AB	AA	AB	AB	AB	BB	BB	BB	AA	AB	BB	AB	BB	BB	BB	AB	AB	AA	AB	AB	AB	AA	BB	BB	AB	AA	AB	BB	BB	AB	AB	AB	AB
953	tig00004411	tig00004411_924120	1	31.488	31.488	AB	AB	BB	AA	AA	AB	BB	AB	BB	AB	AB	AB	AA	AB	AB	AB	BB	BB	BB	AA	AB	BB	AB	BB	BB	BB	AB	AB	AA	AB	AB	AB	AA	BB	BB	AB	AA	AB	BB	BB	AB	AB	AB	AB
954	tig00004411	tig00004411_925876	1	30.817	30.817	AB	AB	BB	AA	AA	AB	BB	AB	BB	AB	AB	AB	AA	AB	AB	AB	BB	BB	BB	AA	AB	BB	AB	BB	BB	BB	AB	AB	AA	AB	AB	AB	AA	BB	AB	AB	AA	AB	BB	BB	AB	AB	AB	AB
955	tig00004411	tig00004411_925902	1	31.488	31.488	AB	AB	BB	AA	AA	AB	BB	AB	BB	AB	AB	AB	AA	AB	AB	AB	BB	BB	BB	AA	AB	BB	AB	BB	BB	BB	AB	AB	AA	AB	AB	AB	AA	BB	BB	AB	AA	AB	BB	BB	AB	AB	AB	AB
956	tig00004411	tig00004411_926158	1	31.488	31.488	AB	AB	BB	AA	AA	AB	BB	AB	BB	AB	AB	AB	AA	AB	AB	AB	BB	BB	BB	AA	AB	BB	AB	BB	BB	BB	AB	AB	AA	AB	AB	AB	AA	BB	BB	AB	AA	AB	BB	BB	AB	AB	AB	AB
957	tig00004411	tig00004411_926372	1	31.488	31.488	AB	AB	BB	AA	AA	AB	BB	AB	BB	AB	AB	AB	AA	AB	AB	AB	BB	BB	BB	AA	AB	BB	AB	BB	BB	BB	AB	AB	AA	AB	AB	AB	AA	BB	BB	AB	AA	AB	BB	BB	AB	AB	AB	AB
958	tig00004411	tig00004411_929518	1	31.488	31.488	AB	AB	BB	AA	AA	AB	BB	AB	BB	AB	AB	AB	AA	AB	AB	AB	BB	BB	BB	AA	AB	BB	AB	BB	BB	BB	AB	AB	AA	AB	AB	AB	AA	BB	BB	AB	AA	AB	BB	BB	AB	AB	AB	AB
959	tig00004411	tig00004411_935352	1	31.488	31.488	AB	AB	BB	AA	AA	AB	BB	AB	BB	AB	AB	AB	AA	AB	AB	AB	BB	BB	BB	AA	AB	BB	AB	BB	BB	BB	AB	AB	AA	AB	AB	AB	AA	BB	BB	AB	AA	AB	BB	BB	AB	AB	AB	AB
960	tig00004411	tig00004411_938344	1	31.488	31.488	AB	AB	BB	AA	AA	AB	BB	AB	BB	AB	AB	AB	AA	AB	AB	AB	BB	BB	BB	AA	AB	BB	AB	BB	BB	BB	AB	AB	AA	AB	AB	AB	AA	BB	BB	AB	AA	AB	BB	BB	AB	AB	AB	AB
961	tig00004411	tig00004411_938374	1	31.488	31.488	AB	AB	BB	AA	AA	AB	BB	AB	BB	AB	AB	AB	AA	AB	AB	AB	BB	BB	BB	AA	AB	BB	AB	BB	BB	BB	AB	AB	AA	AB	AB	AB	AA	BB	BB	AB	AA	AB	BB	BB	AB	AB	AB	AB
962	tig00004411	tig00004411_938758	1	31.488	31.488	AB	AB	BB	AA	AA	AB	BB	AB	BB	AB	AB	AB	AA	AB	AB	AB	BB	BB	BB	AA	AB	BB	AB	BB	BB	BB	AB	AB	AA	AB	AB	AB	AA	BB	BB	AB	AA	AB	BB	BB	AB	AB	AB	AB
963	tig00004411	tig00004411_938768	1	31.488	31.488	AB	AB	BB	AA	AA	AB	BB	AB	BB	AB	AB	AB	AA	AB	AB	AB	BB	BB	BB	AA	AB	BB	AB	BB	BB	BB	AB	AB	AA	AB	AB	AB	AA	BB	BB	AB	AA	AB	BB	BB	AB	AB	AB	AB
964	tig00004411	tig00004411_938789	1	31.488	31.488	AB	AB	BB	AA	AA	AB	BB	AB	BB	AB	AB	AB	AA	AB	AB	AB	BB	BB	BB	AA	AB	BB	AB	BB	BB	BB	AB	AB	AA	AB	AB	AB	AA	BB	BB	AB	AA	AB	BB	BB	AB	AB	AB	AB
965	tig00004411	tig00004411_938994	1	31.488	31.488	AB	AB	BB	AA	AA	AB	BB	AB	BB	AB	AB	AB	AA	AB	AB	AB	BB	BB	BB	AA	AB	BB	AB	BB	BB	BB	AB	AB	AA	AB	AB	AB	AA	BB	BB	AB	AA	AB	BB	BB	AB	AB	AB	AB
966	tig00004411	tig00004411_963249	1	31.488	31.488	AB	AB	BB	AA	AA	AB	BB	AB	BB	AB	AB	AB	AA	AB	AB	AB	BB	BB	BB	AA	AB	BB	AB	BB	BB	BB	AB	AB	AA	AB	AB	AB	AA	BB	BB	AB	AA	AB	BB	BB	AB	AB	AB	AB
967	tig00004411	tig00004411_972040	1	31.488	31.488	AB	AB	BB	AA	AA	AB	BB	AB	BB	AB	AB	AB	AA	AB	AB	AB	BB	BB	BB	AA	AB	BB	AB	BB	BB	BB	AB	AB	AA	AB	AB	AB	AA	BB	BB	AB	AA	AB	BB	BB	AB	AB	AB	AB
968	tig00004411	tig00004411_972081	1	31.488	31.488	AB	AB	BB	AA	AA	AB	BB	AB	BB	AB	AB	AB	AA	AB	AB	AB	BB	BB	BB	AA	AB	BB	AB	BB	BB	BB	AB	AB	AA	AB	AB	AB	AA	BB	BB	AB	AA	AB	BB	BB	AB	AB	AB	AB
969	tig00004411	tig00004411_972088	1	31.488	31.488	AB	AB	BB	AA	AA	AB	BB	AB	BB	AB	AB	AB	AA	AB	AB	AB	BB	BB	BB	AA	AB	BB	AB	BB	BB	BB	AB	AB	AA	AB	AB	AB	AA	BB	BB	AB	AA	AB	BB	BB	AB	AB	AB	AB
970	tig00004411	tig00004411_972118	1	31.488	31.488	AB	AB	BB	AA	AA	AB	BB	AB	BB	AB	AB	AB	AA	AB	AB	AB	BB	BB	BB	AA	AB	BB	AB	BB	BB	BB	AB	AB	AA	AB	AB	AB	AA	BB	BB	AB	AA	AB	BB	BB	AB	AB	AB	AB
971	tig00004411	tig00004411_972160	1	31.488	31.488	AB	AB	BB	AA	AA	AB	BB	AB	BB	AB	AB	AB	AA	AB	AB	AB	BB	BB	BB	AA	AB	BB	AB	BB	BB	BB	AB	AB	AA	AB	AB	AB	AA	BB	BB	AB	AA	AB	BB	BB	AB	AB	AB	AB
972	tig00004411	tig00004411_972170	1	31.488	31.488	AB	AB	BB	AA	AA	AB	BB	AB	BB	AB	AB	AB	AA	AB	AB	AB	BB	BB	BB	AA	AB	BB	AB	BB	BB	BB	AB	AB	AA	AB	AB	AB	AA	BB	BB	AB	AA	AB	BB	BB	AB	AB	AB	AB
973	tig00004411	tig00004411_973005	1	31.488	31.488	AB	AB	BB	AA	AA	AB	BB	AB	BB	AB	AB	AB	AA	AB	AB	AB	BB	BB	BB	AA	AB	BB	AB	BB	BB	BB	AB	AB	AA	AB	AB	AB	AA	BB	BB	AB	AA	AB	BB	BB	AB	AB	AB	AB
974	ctg25542	ctg25542_24067	9	53.252	53.252	AB	AB	BB	AB	AB	BB	AB	AB	AB	BB	AB	AB	AB	AB	BB	BB	AA	AB	AA	AB	BB	AB	BB	BB	AB	BB	BB	AB	AA	AB	AB	BB	AB	AB	BB	AA	AB	AB	AA	AB	AA	BB	AB	AB
978	ctg7323	ctg7323_76670	19	40.977	40.977	AB	AB	BB	AB	AB	AB	BB	AB	AB	AA	AB	AB	AB	BB	BB	AB	AA	AA	AB	AA	AB	AA	BB	AA	BB	BB	AB	AB	BB	AB	AA	AB	AA	BB	AB	AB	AB	AB	AB	AB	BB	BB	AA	AA
989	ctg38090	ctg38090_3773	3	39.727	39.727	AB	AB	AB	AB	AB	AB	AB	AB	AB	AA	AB	AB	AA	BB	AA	AA	AB	AA	BB	AB	AA	AB	BB	AB	AA	AA	BB	AB	AA	AB	AB	AB	AA	AB	AB	BB	AB	AB	AB	AA	AB	BB	AA	AB
990	ctg38090	ctg38090_3850	3	39.727	39.727	AB	AB	AB	AB	AB	AB	AB	AB	AB	AA	AB	AB	AA	BB	AA	AA	AB	AA	BB	AB	AA	AB	BB	AB	AA	AA	BB	AB	AA	AB	AB	AB	AA	AB	AB	BB	AB	AB	AB	AA	AB	BB	AA	AB
991	ctg38095	ctg38095_1121	1	102.005	102.005	AB	AB	AA	AB	BB	AB	BB	AB	BB	AB	AB	AB	AB	BB	AB	AA	AB	AA	BB	AA	AB	AB	AB	BB	BB	BB	AB	AA	AB	AA	BB	AB	AB	AB	AB	AB	AB	AB	AA	AB	AB	AB	BB	AB
992	ctg38095	ctg38095_1783	1	102.005	102.005	AB	AB	AA	AB	BB	AB	BB	AB	BB	AB	AB	AB	AB	BB	AB	AA	AB	AA	BB	AA	AB	AB	AB	BB	BB	BB	AB	AA	AB	AA	BB	AB	AB	AB	AB	AB	AB	AB	AA	AB	AB	AB	BB	AB
993	ctg38095	ctg38095_2131	1	102.005	102.005	AB	AB	AA	AB	BB	AB	BB	AB	BB	AB	AB	AB	AB	BB	AB	AA	AB	AA	BB	AA	AB	AB	AB	BB	BB	BB	AB	AA	AB	AA	BB	AB	AB	AB	AB	AB	AB	AB	AA	AB	AB	AB	BB	AB
994	ctg38095	ctg38095_2362	1	102.005	102.005	AB	AB	AA	AB	BB	AB	BB	AB	BB	AB	AB	AB	AB	BB	AB	AA	AB	AA	BB	AA	AB	AB	AB	BB	BB	BB	AB	AA	AB	AA	BB	AB	AB	AB	AB	AB	AB	AB	AA	AB	AB	AB	BB	AB
995	ctg30699	ctg30699_11260	18	22.399	22.399	AB	AB	AB	AA	AB	AB	AB	AB	AA	AB	AA	BB	AA	AB	AA	AB	AB	AB	BB	AA	AA	AB	AB	AB	AA	AB	BB	AA	AB	AB	BB	AB	AB	AB	AB	AA	BB	AA	AB	AB	AB	AB	AA	AB
996	ctg30699	ctg30699_23444	18	22.399	22.399	AB	AB	AB	AA	AB	AB	AB	AB	AA	AB	AA	BB	AA	AB	AA	AB	AB	AB	BB	AA	AA	AB	AB	AB	AA	AB	BB	AA	AB	AB	BB	AB	AB	AB	AB	AA	BB	AA	AB	AB	AB	AB	AA	AB
997	ctg30699	ctg30699_23681	18	22.399	22.399	AB	AB	AB	AA	AB	AB	AB	AB	AA	AB	AA	BB	AA	AB	AA	AB	AB	AB	BB	AA	AA	AB	AB	AB	AA	AB	BB	AA	AB	AB	BB	AB	AB	AB	AB	AA	BB	AA	AB	AB	AB	AB	AA	AB
998	ctg30699	ctg30699_37720	18	22.399	22.399	AB	AB	AB	AA	AB	AB	AB	AB	AA	AB	AA	BB	AA	AB	AA	AB	AB	AB	BB	AA	AA	AB	AB	AB	AA	AB	BB	AA	AB	AB	BB	AB	AB	AB	AB	AA	BB	AA	AB	AB	AB	AB	AA	AB
999	ctg30699	ctg30699_37811	18	22.399	22.399	AB	AB	AB	AA	AB	AB	AB	AB	AA	AB	AA	BB	AA	AB	AA	AB	AB	AB	BB	AA	AA	AB	AB	AB	AA	AB	BB	AA	AB	AB	BB	AB	AB	AB	AB	AA	BB	AA	AB	AB	AB	AB	AA	AB
1000	ctg30699	ctg30699_49902	18	22.399	22.399	AB	AB	AB	AA	AB	AB	AB	AB	AA	AB	AA	BB	AA	AB	AA	AB	AB	AB	BB	AA	AA	AB	AB	AB	AA	AB	BB	AA	AB	AB	BB	AB	AB	AB	AB	AA	BB	AA	AB	AB	AB	AB	AA	AB
1001	ctg30699	ctg30699_49952	18	22.399	22.399	AB	AB	AB	AA	AB	AB	AB	AB	AA	AB	AA	BB	AA	AB	AA	AB	AB	AB	BB	AA	AA	AB	AB	AB	AA	AB	BB	AA	AB	AB	BB	AB	AB	AB	AB	AA	BB	AA	AB	AB	AB	AB	AA	AB
1002	ctg38321	ctg38321_3849	1	87.911	87.911	AB	AB	AA	AB	BB	AB	BB	AB	BB	AB	AA	AB	AB	BB	AB	AA	AB	AB	BB	AB	AB	AB	AA	BB	BB	BB	AB	AB	AB	AB	BB	AB	AB	AB	BB	BB	AB	AB	BB	BB	AB	AA	BB	BB
1003	ctg38321	ctg38321_6086	1	87.911	87.911	AB	AB	AA	AB	BB	AB	BB	AB	BB	AB	AA	AB	AB	BB	AB	AA	AB	AB	BB	AB	AB	AB	AA	BB	BB	BB	AB	AB	AB	AB	BB	AB	AB	AB	BB	BB	AB	AB	BB	BB	AB	AA	BB	BB
1004	ctg38321	ctg38321_6702	1	87.911	87.911	AB	AB	AA	AB	BB	AB	BB	AB	BB	AB	AA	AB	AB	BB	AB	AA	AB	AB	BB	AB	AB	AB	AA	BB	BB	BB	AB	AB	AB	AB	BB	AB	AB	AB	BB	BB	AB	AB	BB	BB	AB	AA	BB	BB
1005	ctg38321	ctg38321_8415	1	87.911	87.911	AB	AB	AA	AB	BB	AB	BB	AB	BB	AB	AA	AB	AB	BB	AB	AA	AB	AB	BB	AB	AB	AB	AA	BB	BB	BB	AB	AB	AB	AB	BB	AB	AB	AB	BB	BB	AB	AB	BB	BB	AB	AA	BB	BB
1006	ctg38321	ctg38321_9017	1	87.911	87.911	AB	AB	AA	AB	BB	AB	BB	AB	BB	AB	AA	AB	AB	BB	AB	AA	AB	AB	BB	AB	AB	AB	AA	BB	BB	BB	AB	AB	AB	AB	BB	AB	AB	AB	BB	BB	AB	AB	BB	BB	AB	AA	BB	BB
1007	ctg38321	ctg38321_9108	1	87.911	87.911	AB	AB	AA	AB	BB	AB	BB	AB	BB	AB	AA	AB	AB	BB	AB	AA	AB	AB	BB	AB	AB	AB	AA	BB	BB	BB	AB	AB	AB	AB	BB	AB	AB	AB	BB	BB	AB	AB	BB	BB	AB	AA	BB	BB
1008	ctg38321	ctg38321_12412	1	87.911	87.911	AB	AB	AA	AB	BB	AB	BB	AB	BB	AB	AA	AB	AB	BB	AB	AA	AB	AB	BB	AB	AB	AB	AA	BB	BB	BB	AB	AB	AB	AB	BB	AB	AB	AB	BB	BB	AB	AB	BB	BB	AB	AA	BB	BB
1009	ctg38321	ctg38321_12513	1	87.911	87.911	AB	AB	AA	AB	BB	AB	BB	AB	BB	AB	AA	AB	AB	BB	AB	AA	AB	AB	BB	AB	AB	AB	AA	BB	BB	BB	AB	AB	AB	AB	BB	AB	AB	AB	BB	BB	AB	AB	BB	BB	AB	AA	BB	BB
1010	ctg38321	ctg38321_15670	1	87.24	87.24	AB	AB	AA	AB	BB	AB	BB	AB	BB	AB	AA	AB	AB	BB	AB	AA	AB	AB	BB	AB	AB	AB	AA	BB	BB	BB	AB	AB	AB	AB	AB	AB	AB	AB	BB	BB	AB	AB	BB	BB	AB	AA	BB	BB
1011	ctg38321	ctg38321_15677	1	87.911	87.911	AB	AB	AA	AB	BB	AB	BB	AB	BB	AB	AA	AB	AB	BB	AB	AA	AB	AB	BB	AB	AB	AB	AA	BB	BB	BB	AB	AB	AB	AB	BB	AB	AB	AB	BB	BB	AB	AB	BB	BB	AB	AA	BB	BB
1012	ctg7320	ctg7320_837	11	69.088	69.088	AB	AB	AB	BB	BB	AB	AB	BB	AB	AB	AB	AB	AB	AB	AB	AB	AB	AB	AB	AB	AB	AB	AB	AA	AB	AA	AA	AB	BB	AA	AB	AB	AB	AB	AB	AB	AB	AA	BB	AB	AB	BB	AB	BB
1014	ctg7320	ctg7320_15147	11	69.088	69.088	AB	AB	AB	BB	BB	AB	AB	BB	AB	AB	AB	AB	AB	AB	AB	AB	AB	AB	AB	AB	AB	AB	AB	AA	AB	AA	AA	AB	BB	AA	AB	AB	AB	AB	AB	AB	AB	AA	BB	AB	AB	BB	AB	BB
1015	ctg7320	ctg7320_15153	11	71.773	71.773	AB	AB	AB	BB	BB	AB	AB	BB	AB	AB	AB	AB	AB	AB	AB	AB	AB	AB	AB	AB	AB	AB	AB	AA	AB	AA	AA	AB	BB	AA	AB	AB	AB	AB	AB	AB	AB	AA	BB	AB	AB	BB	AB	BB
1017	ctg7320	ctg7320_15363	11	69.088	69.088	AB	AB	AB	BB	BB	AB	AB	BB	AB	AB	AB	AB	AB	AB	AB	AB	AB	AB	AB	AB	AB	AB	AB	AA	AB	AA	AA	AB	BB	AA	AB	AB	AB	AB	AB	AB	AB	AA	BB	AB	AB	BB	AB	BB
1020	ctg7320	ctg7320_19405	11	69.759	69.759	AB	AB	AB	BB	BB	AB	AB	BB	AB	AB	AB	AB	AB	AB	AB	AB	AB	AB	AB	AB	AB	AB	AB	AA	AB	AA	AA	AB	BB	AA	AB	AB	AB	AB	AB	AB	AB	AA	BB	AB	AB	BB	AB	BB
1021	ctg7320	ctg7320_19441	11	69.759	69.759	AB	AB	AB	BB	BB	AB	AB	BB	AB	AB	AB	AB	AB	AB	AB	AB	AB	AB	AB	AB	AB	AB	AB	AA	AB	AA	AA	AB	BB	AA	AB	AB	AB	AB	AB	AB	AB	AA	BB	AB	AB	BB	AB	BB
1022	ctg7320	ctg7320_19455	11	69.759	69.759	AB	AB	AB	BB	BB	AB	AB	BB	AB	AB	AB	AB	AB	AB	AB	AB	AB	AB	AB	AB	AB	AB	AB	AA	AB	AA	AA	AB	BB	AA	AB	AB	AB	AB	AB	AB	AB	AA	BB	AB	AB	BB	AB	BB
1023	ctg7320	ctg7320_21361	11	69.088	69.088	AB	AB	AB	BB	BB	AB	AB	BB	AB	AB	AB	AB	AB	AB	AB	AB	AB	AB	AB	AB	AB	AB	AB	AA	AB	AA	AA	AB	BB	AA	AB	AB	AB	AB	AB	AB	AB	AA	BB	AB	AB	BB	AB	BB
1025	ctg7320	ctg7320_32031	11	69.088	69.088	AB	AB	AB	BB	BB	AB	AB	BB	AB	AB	AB	AB	AB	AB	AB	AB	AB	AB	AB	AB	AB	AB	AB	AA	AB	AA	AA	AB	BB	AA	AB	AB	AB	AB	AB	AB	AB	AA	BB	AB	AB	BB	AB	BB
1028	ctg7320	ctg7320_34862	11	69.088	69.088	AB	AB	AB	BB	BB	AB	AB	BB	AB	AB	AB	AB	AB	AB	AB	AB	AB	AB	AB	AB	AB	AB	AB	AA	AB	AA	AA	AB	BB	AA	AB	AB	AB	AB	AB	AB	AB	AA	BB	AB	AB	BB	AB	BB
1031	ctg7320	ctg7320_47826	11	69.759	69.759	AB	AB	AB	BB	BB	AB	AB	BB	AB	AB	AB	AB	AB	AB	AB	AB	AB	AB	AB	AB	AB	AB	AB	AA	AB	AA	AA	AB	BB	AA	AB	AB	AB	AB	AB	AB	AB	AA	BB	AB	AB	BB	AB	BB
1032	ctg7320	ctg7320_50130	11	69.759	69.759	AB	AB	AB	BB	BB	AB	AB	BB	AB	AB	AB	AB	AB	AB	AB	AB	AB	AB	AB	AB	AB	AB	AB	AA	AB	AA	AA	AB	BB	AA	AB	AB	AB	AB	AB	AB	AB	AA	BB	AB	AB	BB	AB	BB
1033	ctg7320	ctg7320_50142	11	69.759	69.759	AB	AB	AB	BB	BB	AB	AB	BB	AB	AB	AB	AB	AB	AB	AB	AB	AB	AB	AB	AB	AB	AB	AB	AA	AB	AA	AA	AB	BB	AA	AB	AB	AB	AB	AB	AB	AB	AA	BB	AB	AB	BB	AB	BB
1034	ctg7320	ctg7320_50153	11	69.759	69.759	AB	AB	AB	BB	BB	AB	AB	BB	AB	AB	AB	AB	AB	AB	AB	AB	AB	AB	AB	AB	AB	AB	AB	AA	AB	AA	AA	AB	BB	AA	AB	AB	AB	AB	AB	AB	AB	AA	BB	AB	AB	BB	AB	BB
1035	ctg7320	ctg7320_58893	11	69.088	69.088	AB	AB	AB	BB	BB	AB	AB	BB	AB	AB	AB	AB	AB	AB	AB	AB	AB	AB	AB	AB	AB	AB	AB	AA	AB	AA	AA	AB	BB	AA	AB	AB	AB	AB	AB	AB	AB	AA	BB	AB	AB	BB	AB	BB
1036	ctg7320	ctg7320_58905	11	71.773	71.773	AB	AB	AB	BB	BB	AB	AB	BB	AB	AB	AB	AB	AB	AB	AB	AB	AB	AB	AB	AB	AB	AB	AB	AA	AB	AA	AA	AB	BB	AA	AB	AB	AB	AB	AB	AB	AB	AA	BB	AB	AB	BB	AB	BB
1037	ctg7320	ctg7320_58968	11	69.759	69.759	AB	AB	AB	BB	BB	AB	AB	BB	AB	AB	AB	AB	AB	AB	AB	AB	AB	AB	AB	AB	AB	AB	AB	AA	AB	AA	AA	AB	BB	AA	AB	AB	AB	AB	AB	AB	AB	AA	BB	AB	AB	BB	AB	BB
1038	ctg7320	ctg7320_58969	11	69.759	69.759	AB	AB	AB	BB	BB	AB	AB	BB	AB	AB	AB	AB	AB	AB	AB	AB	AB	AB	AB	AB	AB	AB	AB	AA	AB	AA	AA	AB	BB	AA	AB	AB	AB	AB	AB	AB	AB	AA	BB	AB	AB	BB	AB	BB
1040	ctg7320	ctg7320_58993	11	69.759	69.759	AB	AB	AB	BB	BB	AB	AB	BB	AB	AB	AB	AB	AB	AB	AB	AB	AB	AB	AB	AB	AB	AB	AB	AA	AB	AA	AA	AB	BB	AA	AB	AB	AB	AB	AB	AB	AB	AA	BB	AB	AB	BB	AB	BB
1042	ctg7320	ctg7320_59070	11	69.088	69.088	AB	AB	AB	BB	BB	AB	AB	BB	AB	AB	AB	AB	AB	AB	AB	AB	AB	AB	AB	AB	AB	AB	AB	AA	AB	AA	AA	AB	BB	AA	AB	AB	AB	AB	AB	AB	AB	AA	BB	AB	AB	BB	AB	BB
1043	ctg7320	ctg7320_59071	11	69.759	69.759	AB	AB	AB	BB	BB	AB	AB	BB	AB	AB	AB	AB	AB	AB	AB	AB	AB	AB	AB	AB	AB	AB	AB	AA	AB	AA	AA	AB	BB	AA	AB	AB	AB	AB	AB	AB	AB	AA	BB	AB	AB	BB	AB	BB
1044	ctg7320	ctg7320_59188	11	69.088	69.088	AB	AB	AB	BB	BB	AB	AB	BB	AB	AB	AB	AB	AB	AB	AB	AB	AB	AB	AB	AB	AB	AB	AB	AA	AB	AA	AA	AB	BB	AA	AB	AB	AB	AB	AB	AB	AB	AA	BB	AB	AB	BB	AB	BB
1045	ctg7320	ctg7320_59273	11	69.088	69.088	AB	AB	AB	BB	BB	AB	AB	BB	AB	AB	AB	AB	AB	AB	AB	AB	AB	AB	AB	AB	AB	AB	AB	AA	AB	AA	AA	AB	BB	AA	AB	AB	AB	AB	AB	AB	AB	AA	BB	AB	AB	BB	AB	BB
1048	ctg7320	ctg7320_72098	11	71.773	71.773	AB	AB	AB	BB	BB	AB	AB	BB	AB	AB	AB	AB	AB	AB	AB	AB	AB	AB	AB	AB	AB	AB	AB	AA	AB	AA	AA	AB	BB	AA	AB	AB	AB	AB	AB	AB	AB	AA	BB	AB	AB	BB	AB	BB
1049	ctg7320	ctg7320_72261	11	71.773	71.773	AB	AB	AB	BB	BB	AB	AB	BB	AB	AB	AB	AB	AB	AB	AB	AB	AB	AB	AB	AB	AB	AB	AB	AA	AB	AA	AA	AB	BB	AA	AB	AB	AB	AB	AB	AB	AB	AA	BB	AB	AB	BB	AB	BB
1146	contig_37023	contig_37023_2331	16	34.626	34.626	AB	AB	AA	AB	AB	AA	BB	BB	AB	AB	AA	AB	AB	AB	AB	AB	BB	AB	AA	AB	BB	AA	AB	BB	AB	AA	AB	AA	AB	AB	AA	BB	AA	BB	BB	AB	BB	BB	AA	AB	AB	AB	AB	AA
1147	contig_37023	contig_37023_6394	16	34.626	34.626	AB	AB	AA	AB	AB	AA	BB	BB	AB	AB	AA	AB	AB	AB	AB	AB	BB	AB	AA	AB	BB	AA	AB	BB	AB	AA	AB	AA	AB	AB	AA	BB	AA	BB	BB	AB	BB	BB	AA	AB	AB	AB	AB	AA
1148	contig_37023	contig_37023_8668	16	34.626	34.626	AB	AB	AA	AB	AB	AA	BB	BB	AB	AB	AA	AB	AB	AB	AB	AB	BB	AB	AA	AB	BB	AA	AB	BB	AB	AA	AB	AA	AB	AB	AA	BB	AA	BB	BB	AB	BB	BB	AA	AB	AB	AB	AB	AA
1149	contig_37023	contig_37023_10011	16	34.626	34.626	AB	AB	AA	AB	AB	AA	BB	BB	AB	AB	AA	AB	AB	AB	AB	AB	BB	AB	AA	AB	BB	AA	AB	BB	AB	AA	AB	AA	AB	AB	AA	BB	AA	BB	BB	AB	BB	BB	AA	AB	AB	AB	AB	AA
1150	contig_37023	contig_37023_23393	16	34.626	34.626	AB	AB	AA	AB	AB	AA	BB	BB	AB	AB	AA	AB	AB	AB	AB	AB	BB	AB	AA	AB	BB	AA	AB	BB	AB	AA	AB	AA	AB	AB	AA	BB	AA	BB	BB	AB	BB	BB	AA	AB	AB	AB	AB	AA
1151	contig_37023	contig_37023_26124	16	34.626	34.626	AB	AB	AA	AB	AB	AA	BB	BB	AB	AB	AA	AB	AB	AB	AB	AB	BB	AB	AA	AB	BB	AA	AB	BB	AB	AA	AB	AA	AB	AB	AA	BB	AA	BB	BB	AB	BB	BB	AA	AB	AB	AB	AB	AA
1152	contig_37023	contig_37023_26321	16	34.626	34.626	AB	AB	AA	AB	AB	AA	BB	BB	AB	AB	AA	AB	AB	AB	AB	AB	BB	AB	AA	AB	BB	AA	AB	BB	AB	AA	AB	AA	AB	AB	AA	BB	AA	BB	BB	AB	BB	BB	AA	AB	AB	AB	AB	AA
1153	contig_37023	contig_37023_26406	16	34.626	34.626	AB	AB	AA	AB	AB	AA	BB	BB	AB	AB	AA	AB	AB	AB	AB	AB	BB	AB	AA	AB	BB	AA	AB	BB	AB	AA	AB	AA	AB	AB	AA	BB	AA	BB	BB	AB	BB	BB	AA	AB	AB	AB	AB	AA
1154	contig_37023	contig_37023_29527	16	34.626	34.626	AB	AB	AA	AB	AB	AA	BB	BB	AB	AB	AA	AB	AB	AB	AB	AB	BB	AB	AA	AB	BB	AA	AB	BB	AB	AA	AB	AA	AB	AB	AA	BB	AA	BB	BB	AB	BB	BB	AA	AB	AB	AB	AB	AA
1155	contig_37023	contig_37023_30070	16	34.626	34.626	AB	AB	AA	AB	AB	AA	BB	BB	AB	AB	AA	AB	AB	AB	AB	AB	BB	AB	AA	AB	BB	AA	AB	BB	AB	AA	AB	AA	AB	AB	AA	BB	AA	BB	BB	AB	BB	BB	AA	AB	AB	AB	AB	AA
1156	contig_37023	contig_37023_30075	16	34.626	34.626	AB	AB	AA	AB	AB	AA	BB	BB	AB	AB	AA	AB	AB	AB	AB	AB	BB	AB	AA	AB	BB	AA	AB	BB	AB	AA	AB	AA	AB	AB	AA	BB	AA	BB	BB	AB	BB	BB	AA	AB	AB	AB	AB	AA
1157	contig_37023	contig_37023_30325	16	34.626	34.626	AB	AB	AA	AB	AB	AA	BB	BB	AB	AB	AA	AB	AB	AB	AB	AB	BB	AB	AA	AB	BB	AA	AB	BB	AB	AA	AB	AA	AB	AB	AA	BB	AA	BB	BB	AB	BB	BB	AA	AB	AB	AB	AB	AA
1158	contig_37023	contig_37023_35877	16	34.626	34.626	AB	AB	AA	AB	AB	AA	BB	BB	AB	AB	AA	AB	AB	AB	AB	AB	BB	AB	AA	AB	BB	AA	AB	BB	AB	AA	AB	AA	AB	AB	AA	BB	AA	BB	BB	AB	BB	BB	AA	AB	AB	AB	AB	AA
1159	contig_37023	contig_37023_35940	16	34.626	34.626	AB	AB	AA	AB	AB	AA	BB	BB	AB	AB	AA	AB	AB	AB	AB	AB	BB	AB	AA	AB	BB	AA	AB	BB	AB	AA	AB	AA	AB	AB	AA	BB	AA	BB	BB	AB	BB	BB	AA	AB	AB	AB	AB	AA
1160	contig_37023	contig_37023_37616	16	34.626	34.626	AB	AB	AA	AB	AB	AA	BB	BB	AB	AB	AA	AB	AB	AB	AB	AB	BB	AB	AA	AB	BB	AA	AB	BB	AB	AA	AB	AA	AB	AB	AA	BB	AA	BB	BB	AB	BB	BB	AA	AB	AB	AB	AB	AA
1161	contig_37023	contig_37023_39707	16	34.626	34.626	AB	AB	AA	AB	AB	AA	BB	BB	AB	AB	AA	AB	AB	AB	AB	AB	BB	AB	AA	AB	BB	AA	AB	BB	AB	AA	AB	AA	AB	AB	AA	BB	AA	BB	BB	AB	BB	BB	AA	AB	AB	AB	AB	AA
1162	contig_37023	contig_37023_40079	16	34.626	34.626	AB	AB	AA	AB	AB	AA	BB	BB	AB	AB	AA	AB	AB	AB	AB	AB	BB	AB	AA	AB	BB	AA	AB	BB	AB	AA	AB	AA	AB	AB	AA	BB	AA	BB	BB	AB	BB	BB	AA	AB	AB	AB	AB	AA
1163	contig_37023	contig_37023_44896	16	34.626	34.626	AB	AB	AA	AB	AB	AA	BB	BB	AB	AB	AA	AB	AB	AB	AB	AB	BB	AB	AA	AB	BB	AA	AB	BB	AB	AA	AB	AA	AB	AB	AA	BB	AA	BB	BB	AB	BB	BB	AA	AB	AB	AB	AB	AA
1164	contig_37023	contig_37023_44952	16	34.626	34.626	AB	AB	AA	AB	AB	AA	BB	BB	AB	AB	AA	AB	AB	AB	AB	AB	BB	AB	AA	AB	BB	AA	AB	BB	AB	AA	AB	AA	AB	AB	AA	BB	AA	BB	BB	AB	BB	BB	AA	AB	AB	AB	AB	AA
1165	contig_37023	contig_37023_49484	16	34.626	34.626	AB	AB	AA	AB	AB	AA	BB	BB	AB	AB	AA	AB	AB	AB	AB	AB	BB	AB	AA	AB	BB	AA	AB	BB	AB	AA	AB	AA	AB	AB	AA	BB	AA	BB	BB	AB	BB	BB	AA	AB	AB	AB	AB	AA
1166	contig_37023	contig_37023_50732	16	34.626	34.626	AB	AB	AA	AB	AB	AA	BB	BB	AB	AB	AA	AB	AB	AB	AB	AB	BB	AB	AA	AB	BB	AA	AB	BB	AB	AA	AB	AA	AB	AB	AA	BB	AA	BB	BB	AB	BB	BB	AA	AB	AB	AB	AB	AA
1167	contig_37023	contig_37023_50957	16	34.626	34.626	AB	AB	AA	AB	AB	AA	BB	BB	AB	AB	AA	AB	AB	AB	AB	AB	BB	AB	AA	AB	BB	AA	AB	BB	AB	AA	AB	AA	AB	AB	AA	BB	AA	BB	BB	AB	BB	BB	AA	AB	AB	AB	AB	AA
1168	contig_37023	contig_37023_51863	16	34.626	34.626	AB	AB	AA	AB	AB	AA	BB	BB	AB	AB	AA	AB	AB	AB	AB	AB	BB	AB	AA	AB	BB	AA	AB	BB	AB	AA	AB	AA	AB	AB	AA	BB	AA	BB	BB	AB	BB	BB	AA	AB	AB	AB	AB	AA
1169	contig_37023	contig_37023_52588	16	34.626	34.626	AB	AB	AA	AB	AB	AA	BB	BB	AB	AB	AA	AB	AB	AB	AB	AB	BB	AB	AA	AB	BB	AA	AB	BB	AB	AA	AB	AA	AB	AB	AA	BB	AA	BB	BB	AB	BB	BB	AA	AB	AB	AB	AB	AA
1170	contig_37023	contig_37023_52673	16	34.626	34.626	AB	AB	AA	AB	AB	AA	BB	BB	AB	AB	AA	AB	AB	AB	AB	AB	BB	AB	AA	AB	BB	AA	AB	BB	AB	AA	AB	AA	AB	AB	AA	BB	AA	BB	BB	AB	BB	BB	AA	AB	AB	AB	AB	AA
1171	contig_37023	contig_37023_52712	16	34.626	34.626	AB	AB	AA	AB	AB	AA	BB	BB	AB	AB	AA	AB	AB	AB	AB	AB	BB	AB	AA	AB	BB	AA	AB	BB	AB	AA	AB	AA	AB	AB	AA	BB	AA	BB	BB	AB	BB	BB	AA	AB	AB	AB	AB	AA
1172	contig_37023	contig_37023_63193	16	34.626	34.626	AB	AB	AA	AB	AB	AA	BB	BB	AB	AB	AA	AB	AB	AB	AB	AB	BB	AB	AA	AB	BB	AA	AB	BB	AB	AA	AB	AA	AB	AB	AA	BB	AA	BB	BB	AB	BB	BB	AA	AB	AB	AB	AB	AA
1173	contig_37023	contig_37023_63865	16	34.626	34.626	AB	AB	AA	AB	AB	AA	BB	BB	AB	AB	AA	AB	AB	AB	AB	AB	BB	AB	AA	AB	BB	AA	AB	BB	AB	AA	AB	AA	AB	AB	AA	BB	AA	BB	BB	AB	BB	BB	AA	AB	AB	AB	AB	AA
1174	contig_37023	contig_37023_63977	16	34.626	34.626	AB	AB	AA	AB	AB	AA	BB	BB	AB	AB	AA	AB	AB	AB	AB	AB	BB	AB	AA	AB	BB	AA	AB	BB	AB	AA	AB	AA	AB	AB	AA	BB	AA	BB	BB	AB	BB	BB	AA	AB	AB	AB	AB	AA
1175	contig_37023	contig_37023_64419	16	34.626	34.626	AB	AB	AA	AB	AB	AA	BB	BB	AB	AB	AA	AB	AB	AB	AB	AB	BB	AB	AA	AB	BB	AA	AB	BB	AB	AA	AB	AA	AB	AB	AA	BB	AA	BB	BB	AB	BB	BB	AA	AB	AB	AB	AB	AA
1176	contig_37023	contig_37023_65597	16	34.626	34.626	AB	AB	AA	AB	AB	AA	BB	BB	AB	AB	AA	AB	AB	AB	AB	AB	BB	AB	AA	AB	BB	AA	AB	BB	AB	AA	AB	AA	AB	AB	AA	BB	AA	BB	BB	AB	BB	BB	AA	AB	AB	AB	AB	AA
1177	contig_37023	contig_37023_66068	16	34.626	34.626	AB	AB	AA	AB	AB	AA	BB	BB	AB	AB	AA	AB	AB	AB	AB	AB	BB	AB	AA	AB	BB	AA	AB	BB	AB	AA	AB	AA	AB	AB	AA	BB	AA	BB	BB	AB	BB	BB	AA	AB	AB	AB	AB	AA
1178	contig_37023	contig_37023_66072	16	34.626	34.626	AB	AB	AA	AB	AB	AA	BB	BB	AB	AB	AA	AB	AB	AB	AB	AB	BB	AB	AA	AB	BB	AA	AB	BB	AB	AA	AB	AA	AB	AB	AA	BB	AA	BB	BB	AB	BB	BB	AA	AB	AB	AB	AB	AA
1179	contig_37023	contig_37023_66308	16	34.626	34.626	AB	AB	AA	AB	AB	AA	BB	BB	AB	AB	AA	AB	AB	AB	AB	AB	BB	AB	AA	AB	BB	AA	AB	BB	AB	AA	AB	AA	AB	AB	AA	BB	AA	BB	BB	AB	BB	BB	AA	AB	AB	AB	AB	AA
1180	contig_37023	contig_37023_70440	16	34.626	34.626	AB	AB	AA	AB	AB	AA	BB	BB	AB	AB	AA	AB	AB	AB	AB	AB	BB	AB	AA	AB	BB	AA	AB	BB	AB	AA	AB	AA	AB	AB	AA	BB	AA	BB	BB	AB	BB	BB	AA	AB	AB	AB	AB	AA
1181	contig_37023	contig_37023_70817	16	34.626	34.626	AB	AB	AA	AB	AB	AA	BB	BB	AB	AB	AA	AB	AB	AB	AB	AB	BB	AB	AA	AB	BB	AA	AB	BB	AB	AA	AB	AA	AB	AB	AA	BB	AA	BB	BB	AB	BB	BB	AA	AB	AB	AB	AB	AA
1182	contig_37023	contig_37023_70944	16	34.626	34.626	AB	AB	AA	AB	AB	AA	BB	BB	AB	AB	AA	AB	AB	AB	AB	AB	BB	AB	AA	AB	BB	AA	AB	BB	AB	AA	AB	AA	AB	AB	AA	BB	AA	BB	BB	AB	BB	BB	AA	AB	AB	AB	AB	AA
1183	contig_37023	contig_37023_70949	16	34.626	34.626	AB	AB	AA	AB	AB	AA	BB	BB	AB	AB	AA	AB	AB	AB	AB	AB	BB	AB	AA	AB	BB	AA	AB	BB	AB	AA	AB	AA	AB	AB	AA	BB	AA	BB	BB	AB	BB	BB	AA	AB	AB	AB	AB	AA
1184	contig_37023	contig_37023_73131	16	34.626	34.626	AB	AB	AA	AB	AB	AA	BB	BB	AB	AB	AA	AB	AB	AB	AB	AB	BB	AB	AA	AB	BB	AA	AB	BB	AB	AA	AB	AA	AB	AB	AA	BB	AA	BB	BB	AB	BB	BB	AA	AB	AB	AB	AB	AA
1185	contig_37023	contig_37023_73817	16	34.626	34.626	AB	AB	AA	AB	AB	AA	BB	BB	AB	AB	AA	AB	AB	AB	AB	AB	BB	AB	AA	AB	BB	AA	AB	BB	AB	AA	AB	AA	AB	AB	AA	BB	AA	BB	BB	AB	BB	BB	AA	AB	AB	AB	AB	AA
1186	contig_37023	contig_37023_74840	16	34.626	34.626	AB	AB	AA	AB	AB	AA	BB	BB	AB	AB	AA	AB	AB	AB	AB	AB	BB	AB	AA	AB	BB	AA	AB	BB	AB	AA	AB	AA	AB	AB	AA	BB	AA	BB	BB	AB	BB	BB	AA	AB	AB	AB	AB	AA
1187	contig_37023	contig_37023_74891	16	34.626	34.626	AB	AB	AA	AB	AB	AA	BB	BB	AB	AB	AA	AB	AB	AB	AB	AB	BB	AB	AA	AB	BB	AA	AB	BB	AB	AA	AB	AA	AB	AB	AA	BB	AA	BB	BB	AB	BB	BB	AA	AB	AB	AB	AB	AA
1188	contig_37023	contig_37023_74974	16	34.626	34.626	AB	AB	AA	AB	AB	AA	BB	BB	AB	AB	AA	AB	AB	AB	AB	AB	BB	AB	AA	AB	BB	AA	AB	BB	AB	AA	AB	AA	AB	AB	AA	BB	AA	BB	BB	AB	BB	BB	AA	AB	AB	AB	AB	AA
1189	contig_37023	contig_37023_76162	16	34.626	34.626	AB	AB	AA	AB	AB	AA	BB	BB	AB	AB	AA	AB	AB	AB	AB	AB	BB	AB	AA	AB	BB	AA	AB	BB	AB	AA	AB	AA	AB	AB	AA	BB	AA	BB	BB	AB	BB	BB	AA	AB	AB	AB	AB	AA
1190	contig_37023	contig_37023_76212	16	34.626	34.626	AB	AB	AA	AB	AB	AA	BB	BB	AB	AB	AA	AB	AB	AB	AB	AB	BB	AB	AA	AB	BB	AA	AB	BB	AB	AA	AB	AA	AB	AB	AA	BB	AA	BB	BB	AB	BB	BB	AA	AB	AB	AB	AB	AA
1191	contig_37023	contig_37023_76349	16	34.626	34.626	AB	AB	AA	AB	AB	AA	BB	BB	AB	AB	AA	AB	AB	AB	AB	AB	BB	AB	AA	AB	BB	AA	AB	BB	AB	AA	AB	AA	AB	AB	AA	BB	AA	BB	BB	AB	BB	BB	AA	AB	AB	AB	AB	AA
1193	contig_37023	contig_37023_76624	16	36.639	36.639	AB	AB	AA	AB	AB	AA	BB	BB	AB	AB	AA	AB	AB	AB	AB	AB	BB	AB	AA	AB	BB	AA	AB	BB	AB	AA	AB	AA	AB	AB	AA	BB	AA	BB	BB	AB	BB	BB	AA	AB	AB	AB	AB	AA
1194	contig_37023	contig_37023_76802	16	34.626	34.626	AB	AB	AA	AB	AB	AA	BB	BB	AB	AB	AA	AB	AB	AB	AB	AB	BB	AB	AA	AB	BB	AA	AB	BB	AB	AA	AB	AA	AB	AB	AA	BB	AA	BB	BB	AB	BB	BB	AA	AB	AB	AB	AB	AA
1196	contig_37023	contig_37023_89816	16	34.626	34.626	AB	AB	AA	AB	AB	AA	BB	BB	AB	AB	AA	AB	AB	AB	AB	AB	BB	AB	AA	AB	BB	AA	AB	BB	AB	AA	AB	AA	AB	AB	AA	BB	AA	BB	BB	AB	BB	BB	AA	AB	AB	AB	AB	AA
1197	contig_37023	contig_37023_92663	16	34.626	34.626	AB	AB	AA	AB	AB	AA	BB	BB	AB	AB	AA	AB	AB	AB	AB	AB	BB	AB	AA	AB	BB	AA	AB	BB	AB	AA	AB	AA	AB	AB	AA	BB	AA	BB	BB	AB	BB	BB	AA	AB	AB	AB	AB	AA
1198	contig_37023	contig_37023_92730	16	34.626	34.626	AB	AB	AA	AB	AB	AA	BB	BB	AB	AB	AA	AB	AB	AB	AB	AB	BB	AB	AA	AB	BB	AA	AB	BB	AB	AA	AB	AA	AB	AB	AA	BB	AA	BB	BB	AB	BB	BB	AA	AB	AB	AB	AB	AA
1199	contig_37023	contig_37023_93199	16	34.626	34.626	AB	AB	AA	AB	AB	AA	BB	BB	AB	AB	AA	AB	AB	AB	AB	AB	BB	AB	AA	AB	BB	AA	AB	BB	AB	AA	AB	AA	AB	AB	AA	BB	AA	BB	BB	AB	BB	BB	AA	AB	AB	AB	AB	AA
1200	contig_37023	contig_37023_95151	16	34.626	34.626	AB	AB	AA	AB	AB	AA	BB	BB	AB	AB	AA	AB	AB	AB	AB	AB	BB	AB	AA	AB	BB	AA	AB	BB	AB	AA	AB	AA	AB	AB	AA	BB	AA	BB	BB	AB	BB	BB	AA	AB	AB	AB	AB	AA
1201	contig_37023	contig_37023_95262	16	34.626	34.626	AB	AB	AA	AB	AB	AA	BB	BB	AB	AB	AA	AB	AB	AB	AB	AB	BB	AB	AA	AB	BB	AA	AB	BB	AB	AA	AB	AA	AB	AB	AA	BB	AA	BB	BB	AB	BB	BB	AA	AB	AB	AB	AB	AA
1202	contig_37023	contig_37023_96981	16	34.626	34.626	AB	AB	AA	AB	AB	AA	BB	BB	AB	AB	AA	AB	AB	AB	AB	AB	BB	AB	AA	AB	BB	AA	AB	BB	AB	AA	AB	AA	AB	AB	AA	BB	AA	BB	BB	AB	BB	BB	AA	AB	AB	AB	AB	AA
1203	contig_37023	contig_37023_97040	16	34.626	34.626	AB	AB	AA	AB	AB	AA	BB	BB	AB	AB	AA	AB	AB	AB	AB	AB	BB	AB	AA	AB	BB	AA	AB	BB	AB	AA	AB	AA	AB	AB	AA	BB	AA	BB	BB	AB	BB	BB	AA	AB	AB	AB	AB	AA
1204	contig_37023	contig_37023_97262	16	34.626	34.626	AB	AB	AA	AB	AB	AA	BB	BB	AB	AB	AA	AB	AB	AB	AB	AB	BB	AB	AA	AB	BB	AA	AB	BB	AB	AA	AB	AA	AB	AB	AA	BB	AA	BB	BB	AB	BB	BB	AA	AB	AB	AB	AB	AA
1205	contig_37023	contig_37023_103351	16	34.626	34.626	AB	AB	AA	AB	AB	AA	BB	BB	AB	AB	AA	AB	AB	AB	AB	AB	BB	AB	AA	AB	BB	AA	AB	BB	AB	AA	AB	AA	AB	AB	AA	BB	AA	BB	BB	AB	BB	BB	AA	AB	AB	AB	AB	AA
1206	contig_37023	contig_37023_103683	16	34.626	34.626	AB	AB	AA	AB	AB	AA	BB	BB	AB	AB	AA	AB	AB	AB	AB	AB	BB	AB	AA	AB	BB	AA	AB	BB	AB	AA	AB	AA	AB	AB	AA	BB	AA	BB	BB	AB	BB	BB	AA	AB	AB	AB	AB	AA
1207	contig_37023	contig_37023_103797	16	34.626	34.626	AB	AB	AA	AB	AB	AA	BB	BB	AB	AB	AA	AB	AB	AB	AB	AB	BB	AB	AA	AB	BB	AA	AB	BB	AB	AA	AB	AA	AB	AB	AA	BB	AA	BB	BB	AB	BB	BB	AA	AB	AB	AB	AB	AA
1208	contig_37023	contig_37023_104951	16	34.626	34.626	AB	AB	AA	AB	AB	AA	BB	BB	AB	AB	AA	AB	AB	AB	AB	AB	BB	AB	AA	AB	BB	AA	AB	BB	AB	AA	AB	AA	AB	AB	AA	BB	AA	BB	BB	AB	BB	BB	AA	AB	AB	AB	AB	AA
1209	contig_37023	contig_37023_105628	16	34.626	34.626	AB	AB	AA	AB	AB	AA	BB	BB	AB	AB	AA	AB	AB	AB	AB	AB	BB	AB	AA	AB	BB	AA	AB	BB	AB	AA	AB	AA	AB	AB	AA	BB	AA	BB	BB	AB	BB	BB	AA	AB	AB	AB	AB	AA
1210	contig_37023	contig_37023_107572	16	34.626	34.626	AB	AB	AA	AB	AB	AA	BB	BB	AB	AB	AA	AB	AB	AB	AB	AB	BB	AB	AA	AB	BB	AA	AB	BB	AB	AA	AB	AA	AB	AB	AA	BB	AA	BB	BB	AB	BB	BB	AA	AB	AB	AB	AB	AA
1211	contig_37023	contig_37023_107573	16	34.626	34.626	AB	AB	AA	AB	AB	AA	BB	BB	AB	AB	AA	AB	AB	AB	AB	AB	BB	AB	AA	AB	BB	AA	AB	BB	AB	AA	AB	AA	AB	AB	AA	BB	AA	BB	BB	AB	BB	BB	AA	AB	AB	AB	AB	AA
1212	contig_37023	contig_37023_129794	16	34.626	34.626	AB	AB	AA	AB	AB	AA	BB	BB	AB	AB	AA	AB	AB	AB	AB	AB	BB	AB	AA	AB	BB	AA	AB	BB	AB	AA	AB	AA	AB	AB	AA	BB	AA	BB	BB	AB	BB	BB	AA	AB	AB	AB	AB	AA
1213	contig_37023	contig_37023_144796	16	34.626	34.626	AB	AB	AA	AB	AB	AA	BB	BB	AB	AB	AA	AB	AB	AB	AB	AB	BB	AB	AA	AB	BB	AA	AB	BB	AB	AA	AB	AA	AB	AB	AA	BB	AA	BB	BB	AB	BB	BB	AA	AB	AB	AB	AB	AA
1214	contig_37023	contig_37023_146608	16	34.626	34.626	AB	AB	AA	AB	AB	AA	BB	BB	AB	AB	AA	AB	AB	AB	AB	AB	BB	AB	AA	AB	BB	AA	AB	BB	AB	AA	AB	AA	AB	AB	AA	BB	AA	BB	BB	AB	BB	BB	AA	AB	AB	AB	AB	AA
1215	contig_37023	contig_37023_146908	16	34.626	34.626	AB	AB	AA	AB	AB	AA	BB	BB	AB	AB	AA	AB	AB	AB	AB	AB	BB	AB	AA	AB	BB	AA	AB	BB	AB	AA	AB	AA	AB	AB	AA	BB	AA	BB	BB	AB	BB	BB	AA	AB	AB	AB	AB	AA
1216	contig_37023	contig_37023_154470	16	34.626	34.626	AB	AB	AA	AB	AB	AA	BB	BB	AB	AB	AA	AB	AB	AB	AB	AB	BB	AB	AA	AB	BB	AA	AB	BB	AB	AA	AB	AA	AB	AB	AA	BB	AA	BB	BB	AB	BB	BB	AA	AB	AB	AB	AB	AA
1217	contig_37023	contig_37023_154703	16	34.626	34.626	AB	AB	AA	AB	AB	AA	BB	BB	AB	AB	AA	AB	AB	AB	AB	AB	BB	AB	AA	AB	BB	AA	AB	BB	AB	AA	AB	AA	AB	AB	AA	BB	AA	BB	BB	AB	BB	BB	AA	AB	AB	AB	AB	AA
1218	contig_37023	contig_37023_154721	16	34.626	34.626	AB	AB	AA	AB	AB	AA	BB	BB	AB	AB	AA	AB	AB	AB	AB	AB	BB	AB	AA	AB	BB	AA	AB	BB	AB	AA	AB	AA	AB	AB	AA	BB	AA	BB	BB	AB	BB	BB	AA	AB	AB	AB	AB	AA
1221	contig_37023	contig_37023_156345	16	34.626	34.626	AB	AB	AA	AB	AB	AA	BB	BB	AB	AB	AA	AB	AB	AB	AB	AB	BB	AB	AA	AB	BB	AA	AB	BB	AB	AA	AB	AA	AB	AB	AA	BB	AA	BB	BB	AB	BB	BB	AA	AB	AB	AB	AB	AA
1222	contig_37023	contig_37023_156412	16	34.626	34.626	AB	AB	AA	AB	AB	AA	BB	BB	AB	AB	AA	AB	AB	AB	AB	AB	BB	AB	AA	AB	BB	AA	AB	BB	AB	AA	AB	AA	AB	AB	AA	BB	AA	BB	BB	AB	BB	BB	AA	AB	AB	AB	AB	AA
1227	contig_37023	contig_37023_157482	16	34.626	34.626	AB	AB	AA	AB	AB	AA	BB	BB	AB	AB	AA	AB	AB	AB	AB	AB	BB	AB	AA	AB	BB	AA	AB	BB	AB	AA	AB	AA	AB	AB	AA	BB	AA	BB	BB	AB	BB	BB	AA	AB	AB	AB	AB	AA
1228	contig_37023	contig_37023_162562	16	34.626	34.626	AB	AB	AA	AB	AB	AA	BB	BB	AB	AB	AA	AB	AB	AB	AB	AB	BB	AB	AA	AB	BB	AA	AB	BB	AB	AA	AB	AA	AB	AB	AA	BB	AA	BB	BB	AB	BB	BB	AA	AB	AB	AB	AB	AA
1229	contig_37023	contig_37023_162612	16	34.626	34.626	AB	AB	AA	AB	AB	AA	BB	BB	AB	AB	AA	AB	AB	AB	AB	AB	BB	AB	AA	AB	BB	AA	AB	BB	AB	AA	AB	AA	AB	AB	AA	BB	AA	BB	BB	AB	BB	BB	AA	AB	AB	AB	AB	AA
1230	contig_37023	contig_37023_163611	16	34.626	34.626	AB	AB	AA	AB	AB	AA	BB	BB	AB	AB	AA	AB	AB	AB	AB	AB	BB	AB	AA	AB	BB	AA	AB	BB	AB	AA	AB	AA	AB	AB	AA	BB	AA	BB	BB	AB	BB	BB	AA	AB	AB	AB	AB	AA
1231	contig_37023	contig_37023_163713	16	34.626	34.626	AB	AB	AA	AB	AB	AA	BB	BB	AB	AB	AA	AB	AB	AB	AB	AB	BB	AB	AA	AB	BB	AA	AB	BB	AB	AA	AB	AA	AB	AB	AA	BB	AA	BB	BB	AB	BB	BB	AA	AB	AB	AB	AB	AA
1232	contig_37023	contig_37023_163770	16	34.626	34.626	AB	AB	AA	AB	AB	AA	BB	BB	AB	AB	AA	AB	AB	AB	AB	AB	BB	AB	AA	AB	BB	AA	AB	BB	AB	AA	AB	AA	AB	AB	AA	BB	AA	BB	BB	AB	BB	BB	AA	AB	AB	AB	AB	AA
1233	contig_37023	contig_37023_164124	16	34.626	34.626	AB	AB	AA	AB	AB	AA	BB	BB	AB	AB	AA	AB	AB	AB	AB	AB	BB	AB	AA	AB	BB	AA	AB	BB	AB	AA	AB	AA	AB	AB	AA	BB	AA	BB	BB	AB	BB	BB	AA	AB	AB	AB	AB	AA
1234	contig_37023	contig_37023_164134	16	34.626	34.626	AB	AB	AA	AB	AB	AA	BB	BB	AB	AB	AA	AB	AB	AB	AB	AB	BB	AB	AA	AB	BB	AA	AB	BB	AB	AA	AB	AA	AB	AB	AA	BB	AA	BB	BB	AB	BB	BB	AA	AB	AB	AB	AB	AA
1235	contig_37023	contig_37023_164142	16	34.626	34.626	AB	AB	AA	AB	AB	AA	BB	BB	AB	AB	AA	AB	AB	AB	AB	AB	BB	AB	AA	AB	BB	AA	AB	BB	AB	AA	AB	AA	AB	AB	AA	BB	AA	BB	BB	AB	BB	BB	AA	AB	AB	AB	AB	AA
1236	contig_37023	contig_37023_164149	16	34.626	34.626	AB	AB	AA	AB	AB	AA	BB	BB	AB	AB	AA	AB	AB	AB	AB	AB	BB	AB	AA	AB	BB	AA	AB	BB	AB	AA	AB	AA	AB	AB	AA	BB	AA	BB	BB	AB	BB	BB	AA	AB	AB	AB	AB	AA
1237	contig_37023	contig_37023_164270	16	34.626	34.626	AB	AB	AA	AB	AB	AA	BB	BB	AB	AB	AA	AB	AB	AB	AB	AB	BB	AB	AA	AB	BB	AA	AB	BB	AB	AA	AB	AA	AB	AB	AA	BB	AA	BB	BB	AB	BB	BB	AA	AB	AB	AB	AB	AA
1238	contig_37023	contig_37023_164311	16	34.626	34.626	AB	AB	AA	AB	AB	AA	BB	BB	AB	AB	AA	AB	AB	AB	AB	AB	BB	AB	AA	AB	BB	AA	AB	BB	AB	AA	AB	AA	AB	AB	AA	BB	AA	BB	BB	AB	BB	BB	AA	AB	AB	AB	AB	AA
1239	contig_37023	contig_37023_164318	16	34.626	34.626	AB	AB	AA	AB	AB	AA	BB	BB	AB	AB	AA	AB	AB	AB	AB	AB	BB	AB	AA	AB	BB	AA	AB	BB	AB	AA	AB	AA	AB	AB	AA	BB	AA	BB	BB	AB	BB	BB	AA	AB	AB	AB	AB	AA
1240	contig_37023	contig_37023_164319	16	34.626	34.626	AB	AB	AA	AB	AB	AA	BB	BB	AB	AB	AA	AB	AB	AB	AB	AB	BB	AB	AA	AB	BB	AA	AB	BB	AB	AA	AB	AA	AB	AB	AA	BB	AA	BB	BB	AB	BB	BB	AA	AB	AB	AB	AB	AA
1241	contig_37023	contig_37023_164424	16	34.626	34.626	AB	AB	AA	AB	AB	AA	BB	BB	AB	AB	AA	AB	AB	AB	AB	AB	BB	AB	AA	AB	BB	AA	AB	BB	AB	AA	AB	AA	AB	AB	AA	BB	AA	BB	BB	AB	BB	BB	AA	AB	AB	AB	AB	AA
1242	contig_37023	contig_37023_164648	16	34.626	34.626	AB	AB	AA	AB	AB	AA	BB	BB	AB	AB	AA	AB	AB	AB	AB	AB	BB	AB	AA	AB	BB	AA	AB	BB	AB	AA	AB	AA	AB	AB	AA	BB	AA	BB	BB	AB	BB	BB	AA	AB	AB	AB	AB	AA
1243	contig_37023	contig_37023_164653	16	34.626	34.626	AB	AB	AA	AB	AB	AA	BB	BB	AB	AB	AA	AB	AB	AB	AB	AB	BB	AB	AA	AB	BB	AA	AB	BB	AB	AA	AB	AA	AB	AB	AA	BB	AA	BB	BB	AB	BB	BB	AA	AB	AB	AB	AB	AA
1244	contig_37023	contig_37023_164795	16	34.626	34.626	AB	AB	AA	AB	AB	AA	BB	BB	AB	AB	AA	AB	AB	AB	AB	AB	BB	AB	AA	AB	BB	AA	AB	BB	AB	AA	AB	AA	AB	AB	AA	BB	AA	BB	BB	AB	BB	BB	AA	AB	AB	AB	AB	AA
1245	contig_37023	contig_37023_164804	16	34.626	34.626	AB	AB	AA	AB	AB	AA	BB	BB	AB	AB	AA	AB	AB	AB	AB	AB	BB	AB	AA	AB	BB	AA	AB	BB	AB	AA	AB	AA	AB	AB	AA	BB	AA	BB	BB	AB	BB	BB	AA	AB	AB	AB	AB	AA
1246	contig_37023	contig_37023_164819	16	34.626	34.626	AB	AB	AA	AB	AB	AA	BB	BB	AB	AB	AA	AB	AB	AB	AB	AB	BB	AB	AA	AB	BB	AA	AB	BB	AB	AA	AB	AA	AB	AB	AA	BB	AA	BB	BB	AB	BB	BB	AA	AB	AB	AB	AB	AA
1247	contig_37023	contig_37023_166419	16	34.626	34.626	AB	AB	AA	AB	AB	AA	BB	BB	AB	AB	AA	AB	AB	AB	AB	AB	BB	AB	AA	AB	BB	AA	AB	BB	AB	AA	AB	AA	AB	AB	AA	BB	AA	BB	BB	AB	BB	BB	AA	AB	AB	AB	AB	AA
1248	contig_37023	contig_37023_166420	16	34.626	34.626	AB	AB	AA	AB	AB	AA	BB	BB	AB	AB	AA	AB	AB	AB	AB	AB	BB	AB	AA	AB	BB	AA	AB	BB	AB	AA	AB	AA	AB	AB	AA	BB	AA	BB	BB	AB	BB	BB	AA	AB	AB	AB	AB	AA
1249	contig_37023	contig_37023_166424	16	34.626	34.626	AB	AB	AA	AB	AB	AA	BB	BB	AB	AB	AA	AB	AB	AB	AB	AB	BB	AB	AA	AB	BB	AA	AB	BB	AB	AA	AB	AA	AB	AB	AA	BB	AA	BB	BB	AB	BB	BB	AA	AB	AB	AB	AB	AA
1250	contig_37023	contig_37023_166465	16	34.626	34.626	AB	AB	AA	AB	AB	AA	BB	BB	AB	AB	AA	AB	AB	AB	AB	AB	BB	AB	AA	AB	BB	AA	AB	BB	AB	AA	AB	AA	AB	AB	AA	BB	AA	BB	BB	AB	BB	BB	AA	AB	AB	AB	AB	AA
1251	contig_37023	contig_37023_166540	16	34.626	34.626	AB	AB	AA	AB	AB	AA	BB	BB	AB	AB	AA	AB	AB	AB	AB	AB	BB	AB	AA	AB	BB	AA	AB	BB	AB	AA	AB	AA	AB	AB	AA	BB	AA	BB	BB	AB	BB	BB	AA	AB	AB	AB	AB	AA
1252	contig_37023	contig_37023_166608	16	34.626	34.626	AB	AB	AA	AB	AB	AA	BB	BB	AB	AB	AA	AB	AB	AB	AB	AB	BB	AB	AA	AB	BB	AA	AB	BB	AB	AA	AB	AA	AB	AB	AA	BB	AA	BB	BB	AB	BB	BB	AA	AB	AB	AB	AB	AA
1253	contig_37023	contig_37023_166729	16	34.626	34.626	AB	AB	AA	AB	AB	AA	BB	BB	AB	AB	AA	AB	AB	AB	AB	AB	BB	AB	AA	AB	BB	AA	AB	BB	AB	AA	AB	AA	AB	AB	AA	BB	AA	BB	BB	AB	BB	BB	AA	AB	AB	AB	AB	AA
1254	contig_37023	contig_37023_169721	16	34.626	34.626	AB	AB	AA	AB	AB	AA	BB	BB	AB	AB	AA	AB	AB	AB	AB	AB	BB	AB	AA	AB	BB	AA	AB	BB	AB	AA	AB	AA	AB	AB	AA	BB	AA	BB	BB	AB	BB	BB	AA	AB	AB	AB	AB	AA
1255	contig_37023	contig_37023_170589	16	34.626	34.626	AB	AB	AA	AB	AB	AA	BB	BB	AB	AB	AA	AB	AB	AB	AB	AB	BB	AB	AA	AB	BB	AA	AB	BB	AB	AA	AB	AA	AB	AB	AA	BB	AA	BB	BB	AB	BB	BB	AA	AB	AB	AB	AB	AA
1256	contig_37023	contig_37023_170607	16	34.626	34.626	AB	AB	AA	AB	AB	AA	BB	BB	AB	AB	AA	AB	AB	AB	AB	AB	BB	AB	AA	AB	BB	AA	AB	BB	AB	AA	AB	AA	AB	AB	AA	BB	AA	BB	BB	AB	BB	BB	AA	AB	AB	AB	AB	AA
1257	contig_37023	contig_37023_170770	16	34.626	34.626	AB	AB	AA	AB	AB	AA	BB	BB	AB	AB	AA	AB	AB	AB	AB	AB	BB	AB	AA	AB	BB	AA	AB	BB	AB	AA	AB	AA	AB	AB	AA	BB	AA	BB	BB	AB	BB	BB	AA	AB	AB	AB	AB	AA
1258	contig_37023	contig_37023_171227	16	34.626	34.626	AB	AB	AA	AB	AB	AA	BB	BB	AB	AB	AA	AB	AB	AB	AB	AB	BB	AB	AA	AB	BB	AA	AB	BB	AB	AA	AB	AA	AB	AB	AA	BB	AA	BB	BB	AB	BB	BB	AA	AB	AB	AB	AB	AA
1259	contig_37023	contig_37023_171341	16	34.626	34.626	AB	AB	AA	AB	AB	AA	BB	BB	AB	AB	AA	AB	AB	AB	AB	AB	BB	AB	AA	AB	BB	AA	AB	BB	AB	AA	AB	AA	AB	AB	AA	BB	AA	BB	BB	AB	BB	BB	AA	AB	AB	AB	AB	AA
1260	contig_37023	contig_37023_171358	16	34.626	34.626	AB	AB	AA	AB	AB	AA	BB	BB	AB	AB	AA	AB	AB	AB	AB	AB	BB	AB	AA	AB	BB	AA	AB	BB	AB	AA	AB	AA	AB	AB	AA	BB	AA	BB	BB	AB	BB	BB	AA	AB	AB	AB	AB	AA
1261	contig_37023	contig_37023_171360	16	34.626	34.626	AB	AB	AA	AB	AB	AA	BB	BB	AB	AB	AA	AB	AB	AB	AB	AB	BB	AB	AA	AB	BB	AA	AB	BB	AB	AA	AB	AA	AB	AB	AA	BB	AA	BB	BB	AB	BB	BB	AA	AB	AB	AB	AB	AA
1262	contig_37023	contig_37023_171502	16	34.626	34.626	AB	AB	AA	AB	AB	AA	BB	BB	AB	AB	AA	AB	AB	AB	AB	AB	BB	AB	AA	AB	BB	AA	AB	BB	AB	AA	AB	AA	AB	AB	AA	BB	AA	BB	BB	AB	BB	BB	AA	AB	AB	AB	AB	AA
1263	contig_37023	contig_37023_173056	16	34.626	34.626	AB	AB	AA	AB	AB	AA	BB	BB	AB	AB	AA	AB	AB	AB	AB	AB	BB	AB	AA	AB	BB	AA	AB	BB	AB	AA	AB	AA	AB	AB	AA	BB	AA	BB	BB	AB	BB	BB	AA	AB	AB	AB	AB	AA
1264	contig_37023	contig_37023_173074	16	34.626	34.626	AB	AB	AA	AB	AB	AA	BB	BB	AB	AB	AA	AB	AB	AB	AB	AB	BB	AB	AA	AB	BB	AA	AB	BB	AB	AA	AB	AA	AB	AB	AA	BB	AA	BB	BB	AB	BB	BB	AA	AB	AB	AB	AB	AA
1265	contig_37023	contig_37023_173079	16	34.626	34.626	AB	AB	AA	AB	AB	AA	BB	BB	AB	AB	AA	AB	AB	AB	AB	AB	BB	AB	AA	AB	BB	AA	AB	BB	AB	AA	AB	AA	AB	AB	AA	BB	AA	BB	BB	AB	BB	BB	AA	AB	AB	AB	AB	AA
1266	contig_37023	contig_37023_173866	16	34.626	34.626	AB	AB	AA	AB	AB	AA	BB	BB	AB	AB	AA	AB	AB	AB	AB	AB	BB	AB	AA	AB	BB	AA	AB	BB	AB	AA	AB	AA	AB	AB	AA	BB	AA	BB	BB	AB	BB	BB	AA	AB	AB	AB	AB	AA
1267	contig_37023	contig_37023_201301	16	34.626	34.626	AB	AB	AA	AB	AB	AA	BB	BB	AB	AB	AA	AB	AB	AB	AB	AB	BB	AB	AA	AB	BB	AA	AB	BB	AB	AA	AB	AA	AB	AB	AA	BB	AA	BB	BB	AB	BB	BB	AA	AB	AB	AB	AB	AA
1268	contig_37023	contig_37023_201949	16	34.626	34.626	AB	AB	AA	AB	AB	AA	BB	BB	AB	AB	AA	AB	AB	AB	AB	AB	BB	AB	AA	AB	BB	AA	AB	BB	AB	AA	AB	AA	AB	AB	AA	BB	AA	BB	BB	AB	BB	BB	AA	AB	AB	AB	AB	AA
1269	contig_37023	contig_37023_201974	16	34.626	34.626	AB	AB	AA	AB	AB	AA	BB	BB	AB	AB	AA	AB	AB	AB	AB	AB	BB	AB	AA	AB	BB	AA	AB	BB	AB	AA	AB	AA	AB	AB	AA	BB	AA	BB	BB	AB	BB	BB	AA	AB	AB	AB	AB	AA
1270	contig_37023	contig_37023_201975	16	34.626	34.626	AB	AB	AA	AB	AB	AA	BB	BB	AB	AB	AA	AB	AB	AB	AB	AB	BB	AB	AA	AB	BB	AA	AB	BB	AB	AA	AB	AA	AB	AB	AA	BB	AA	BB	BB	AB	BB	BB	AA	AB	AB	AB	AB	AA
1271	contig_37023	contig_37023_202159	16	34.626	34.626	AB	AB	AA	AB	AB	AA	BB	BB	AB	AB	AA	AB	AB	AB	AB	AB	BB	AB	AA	AB	BB	AA	AB	BB	AB	AA	AB	AA	AB	AB	AA	BB	AA	BB	BB	AB	BB	BB	AA	AB	AB	AB	AB	AA
1272	contig_37023	contig_37023_202198	16	34.626	34.626	AB	AB	AA	AB	AB	AA	BB	BB	AB	AB	AA	AB	AB	AB	AB	AB	BB	AB	AA	AB	BB	AA	AB	BB	AB	AA	AB	AA	AB	AB	AA	BB	AA	BB	BB	AB	BB	BB	AA	AB	AB	AB	AB	AA
1273	contig_37023	contig_37023_202632	16	34.626	34.626	AB	AB	AA	AB	AB	AA	BB	BB	AB	AB	AA	AB	AB	AB	AB	AB	BB	AB	AA	AB	BB	AA	AB	BB	AB	AA	AB	AA	AB	AB	AA	BB	AA	BB	BB	AB	BB	BB	AA	AB	AB	AB	AB	AA
1274	contig_37023	contig_37023_202979	16	34.626	34.626	AB	AB	AA	AB	AB	AA	BB	BB	AB	AB	AA	AB	AB	AB	AB	AB	BB	AB	AA	AB	BB	AA	AB	BB	AB	AA	AB	AA	AB	AB	AA	BB	AA	BB	BB	AB	BB	BB	AA	AB	AB	AB	AB	AA
1275	contig_37023	contig_37023_225620	16	34.626	34.626	AB	AB	AA	AB	AB	AA	BB	BB	AB	AB	AA	AB	AB	AB	AB	AB	BB	AB	AA	AB	BB	AA	AB	BB	AB	AA	AB	AA	AB	AB	AA	BB	AA	BB	BB	AB	BB	BB	AA	AB	AB	AB	AB	AA
1276	contig_37023	contig_37023_225680	16	34.626	34.626	AB	AB	AA	AB	AB	AA	BB	BB	AB	AB	AA	AB	AB	AB	AB	AB	BB	AB	AA	AB	BB	AA	AB	BB	AB	AA	AB	AA	AB	AB	AA	BB	AA	BB	BB	AB	BB	BB	AA	AB	AB	AB	AB	AA
1277	contig_37023	contig_37023_231431	16	34.626	34.626	AB	AB	AA	AB	AB	AA	BB	BB	AB	AB	AA	AB	AB	AB	AB	AB	BB	AB	AA	AB	BB	AA	AB	BB	AB	AA	AB	AA	AB	AB	AA	BB	AA	BB	BB	AB	BB	BB	AA	AB	AB	AB	AB	AA
1278	contig_37023	contig_37023_233407	16	34.626	34.626	AB	AB	AA	AB	AB	AA	BB	BB	AB	AB	AA	AB	AB	AB	AB	AB	BB	AB	AA	AB	BB	AA	AB	BB	AB	AA	AB	AA	AB	AB	AA	BB	AA	BB	BB	AB	BB	BB	AA	AB	AB	AB	AB	AA
1279	contig_37023	contig_37023_233474	16	34.626	34.626	AB	AB	AA	AB	AB	AA	BB	BB	AB	AB	AA	AB	AB	AB	AB	AB	BB	AB	AA	AB	BB	AA	AB	BB	AB	AA	AB	AA	AB	AB	AA	BB	AA	BB	BB	AB	BB	BB	AA	AB	AB	AB	AB	AA
1280	contig_37023	contig_37023_233582	16	34.626	34.626	AB	AB	AA	AB	AB	AA	BB	BB	AB	AB	AA	AB	AB	AB	AB	AB	BB	AB	AA	AB	BB	AA	AB	BB	AB	AA	AB	AA	AB	AB	AA	BB	AA	BB	BB	AB	BB	BB	AA	AB	AB	AB	AB	AA
1281	contig_37023	contig_37023_234829	16	34.626	34.626	AB	AB	AA	AB	AB	AA	BB	BB	AB	AB	AA	AB	AB	AB	AB	AB	BB	AB	AA	AB	BB	AA	AB	BB	AB	AA	AB	AA	AB	AB	AA	BB	AA	BB	BB	AB	BB	BB	AA	AB	AB	AB	AB	AA
1282	contig_37023	contig_37023_242290	16	34.626	34.626	AB	AB	AA	AB	AB	AA	BB	BB	AB	AB	AA	AB	AB	AB	AB	AB	BB	AB	AA	AB	BB	AA	AB	BB	AB	AA	AB	AA	AB	AB	AA	BB	AA	BB	BB	AB	BB	BB	AA	AB	AB	AB	AB	AA
1283	contig_37023	contig_37023_242440	16	34.626	34.626	AB	AB	AA	AB	AB	AA	BB	BB	AB	AB	AA	AB	AB	AB	AB	AB	BB	AB	AA	AB	BB	AA	AB	BB	AB	AA	AB	AA	AB	AB	AA	BB	AA	BB	BB	AB	BB	BB	AA	AB	AB	AB	AB	AA
1284	contig_37023	contig_37023_245354	16	38.653	38.653	AB	AB	AA	AB	AB	AA	BB	BB	AB	AB	AA	AB	AB	AB	AB	AB	BB	AB	AA	AB	AB	AA	AB	BB	AB	AA	AB	AA	AB	AB	AA	AB	AA	BB	BB	AB	BB	BB	AA	AB	AB	AB	AB	AA
1285	contig_37023	contig_37023_249080	16	34.626	34.626	AB	AB	AA	AB	AB	AA	BB	BB	AB	AB	AA	AB	AB	AB	AB	AB	BB	AB	AA	AB	BB	AA	AB	BB	AB	AA	AB	AA	AB	AB	AA	BB	AA	BB	BB	AB	BB	BB	AA	AB	AB	AB	AB	AA
1286	contig_37023	contig_37023_251475	16	34.626	34.626	AB	AB	AA	AB	AB	AA	BB	BB	AB	AB	AA	AB	AB	AB	AB	AB	BB	AB	AA	AB	BB	AA	AB	BB	AB	AA	AB	AA	AB	AB	AA	BB	AA	BB	BB	AB	BB	BB	AA	AB	AB	AB	AB	AA
1287	contig_37023	contig_37023_262016	16	34.626	34.626	AB	AB	AA	AB	AB	AA	BB	BB	AB	AB	AA	AB	AB	AB	AB	AB	BB	AB	AA	AB	BB	AA	AB	BB	AB	AA	AB	AA	AB	AB	AA	BB	AA	BB	BB	AB	BB	BB	AA	AB	AB	AB	AB	AA
1288	contig_37023	contig_37023_264443	16	34.626	34.626	AB	AB	AA	AB	AB	AA	BB	BB	AB	AB	AA	AB	AB	AB	AB	AB	BB	AB	AA	AB	BB	AA	AB	BB	AB	AA	AB	AA	AB	AB	AA	BB	AA	BB	BB	AB	BB	BB	AA	AB	AB	AB	AB	AA
1289	contig_37023	contig_37023_269733	16	34.626	34.626	AB	AB	AA	AB	AB	AA	BB	BB	AB	AB	AA	AB	AB	AB	AB	AB	BB	AB	AA	AB	BB	AA	AB	BB	AB	AA	AB	AA	AB	AB	AA	BB	AA	BB	BB	AB	BB	BB	AA	AB	AB	AB	AB	AA
1291	contig_37023	contig_37023_299078	16	34.626	34.626	AB	AB	AA	AB	AB	AA	BB	BB	AB	AB	AA	AB	AB	AB	AB	AB	BB	AB	AA	AB	BB	AA	AB	BB	AB	AA	AB	AA	AB	AB	AA	BB	AA	BB	BB	AB	BB	BB	AA	AB	AB	AB	AB	AA
1292	contig_37023	contig_37023_299754	16	34.626	34.626	AB	AB	AA	AB	AB	AA	BB	BB	AB	AB	AA	AB	AB	AB	AB	AB	BB	AB	AA	AB	BB	AA	AB	BB	AB	AA	AB	AA	AB	AB	AA	BB	AA	BB	BB	AB	BB	BB	AA	AB	AB	AB	AB	AA
1293	contig_37023	contig_37023_304247	16	34.626	34.626	AB	AB	AA	AB	AB	AA	BB	BB	AB	AB	AA	AB	AB	AB	AB	AB	BB	AB	AA	AB	BB	AA	AB	BB	AB	AA	AB	AA	AB	AB	AA	BB	AA	BB	BB	AB	BB	BB	AA	AB	AB	AB	AB	AA
1294	contig_37023	contig_37023_310700	16	34.626	34.626	AB	AB	AA	AB	AB	AA	BB	BB	AB	AB	AA	AB	AB	AB	AB	AB	BB	AB	AA	AB	BB	AA	AB	BB	AB	AA	AB	AA	AB	AB	AA	BB	AA	BB	BB	AB	BB	BB	AA	AB	AB	AB	AB	AA
1295	contig_37023	contig_37023_341585	16	34.626	34.626	AB	AB	AA	AB	AB	AA	BB	BB	AB	AB	AA	AB	AB	AB	AB	AB	BB	AB	AA	AB	BB	AA	AB	BB	AB	AA	AB	AA	AB	AB	AA	BB	AA	BB	BB	AB	BB	BB	AA	AB	AB	AB	AB	AA
1296	contig_37023	contig_37023_342998	16	34.626	34.626	AB	AB	AA	AB	AB	AA	BB	BB	AB	AB	AA	AB	AB	AB	AB	AB	BB	AB	AA	AB	BB	AA	AB	BB	AB	AA	AB	AA	AB	AB	AA	BB	AA	BB	BB	AB	BB	BB	AA	AB	AB	AB	AB	AA
1297	contig_37023	contig_37023_344716	16	34.626	34.626	AB	AB	AA	AB	AB	AA	BB	BB	AB	AB	AA	AB	AB	AB	AB	AB	BB	AB	AA	AB	BB	AA	AB	BB	AB	AA	AB	AA	AB	AB	AA	BB	AA	BB	BB	AB	BB	BB	AA	AB	AB	AB	AB	AA
1298	contig_37023	contig_37023_345464	16	34.626	34.626	AB	AB	AA	AB	AB	AA	BB	BB	AB	AB	AA	AB	AB	AB	AB	AB	BB	AB	AA	AB	BB	AA	AB	BB	AB	AA	AB	AA	AB	AB	AA	BB	AA	BB	BB	AB	BB	BB	AA	AB	AB	AB	AB	AA
1299	contig_37023	contig_37023_347562	16	34.626	34.626	AB	AB	AA	AB	AB	AA	BB	BB	AB	AB	AA	AB	AB	AB	AB	AB	BB	AB	AA	AB	BB	AA	AB	BB	AB	AA	AB	AA	AB	AB	AA	BB	AA	BB	BB	AB	BB	BB	AA	AB	AB	AB	AB	AA
1300	contig_37023	contig_37023_348180	16	36.639	36.639	AB	AB	AA	AB	AB	AA	BB	BB	AB	AB	AA	AB	AB	AB	AB	AB	BB	AB	AA	AB	BB	AA	AB	BB	AB	AA	AB	AA	AB	AB	AA	BB	AA	BB	BB	AB	BB	BB	AA	AB	AB	AB	AB	AA
1301	contig_37023	contig_37023_349164	16	34.626	34.626	AB	AB	AA	AB	AB	AA	BB	BB	AB	AB	AA	AB	AB	AB	AB	AB	BB	AB	AA	AB	BB	AA	AB	BB	AB	AA	AB	AA	AB	AB	AA	BB	AA	BB	BB	AB	BB	BB	AA	AB	AB	AB	AB	AA
1302	contig_37023	contig_37023_349219	16	34.626	34.626	AB	AB	AA	AB	AB	AA	BB	BB	AB	AB	AA	AB	AB	AB	AB	AB	BB	AB	AA	AB	BB	AA	AB	BB	AB	AA	AB	AA	AB	AB	AA	BB	AA	BB	BB	AB	BB	BB	AA	AB	AB	AB	AB	AA
1303	contig_37023	contig_37023_349220	16	34.626	34.626	AB	AB	AA	AB	AB	AA	BB	BB	AB	AB	AA	AB	AB	AB	AB	AB	BB	AB	AA	AB	BB	AA	AB	BB	AB	AA	AB	AA	AB	AB	AA	BB	AA	BB	BB	AB	BB	BB	AA	AB	AB	AB	AB	AA
1304	contig_37023	contig_37023_349474	16	34.626	34.626	AB	AB	AA	AB	AB	AA	BB	BB	AB	AB	AA	AB	AB	AB	AB	AB	BB	AB	AA	AB	BB	AA	AB	BB	AB	AA	AB	AA	AB	AB	AA	BB	AA	BB	BB	AB	BB	BB	AA	AB	AB	AB	AB	AA
1305	contig_37023	contig_37023_349558	16	34.626	34.626	AB	AB	AA	AB	AB	AA	BB	BB	AB	AB	AA	AB	AB	AB	AB	AB	BB	AB	AA	AB	BB	AA	AB	BB	AB	AA	AB	AA	AB	AB	AA	BB	AA	BB	BB	AB	BB	BB	AA	AB	AB	AB	AB	AA
1306	contig_37023	contig_37023_351113	16	34.626	34.626	AB	AB	AA	AB	AB	AA	BB	BB	AB	AB	AA	AB	AB	AB	AB	AB	BB	AB	AA	AB	BB	AA	AB	BB	AB	AA	AB	AA	AB	AB	AA	BB	AA	BB	BB	AB	BB	BB	AA	AB	AB	AB	AB	AA
1307	contig_37023	contig_37023_355438	16	34.626	34.626	AB	AB	AA	AB	AB	AA	BB	BB	AB	AB	AA	AB	AB	AB	AB	AB	BB	AB	AA	AB	BB	AA	AB	BB	AB	AA	AB	AA	AB	AB	AA	BB	AA	BB	BB	AB	BB	BB	AA	AB	AB	AB	AB	AA
1310	contig_37023	contig_37023_394087	16	34.626	34.626	AB	AB	AA	AB	AB	AA	BB	BB	AB	AB	AA	AB	AB	AB	AB	AB	BB	AB	AA	AB	BB	AA	AB	BB	AB	AA	AB	AA	AB	AB	AA	BB	AA	BB	BB	AB	BB	BB	AA	AB	AB	AB	AB	AA
1311	contig_37023	contig_37023_404013	16	34.626	34.626	AB	AB	AA	AB	AB	AA	BB	BB	AB	AB	AA	AB	AB	AB	AB	AB	BB	AB	AA	AB	BB	AA	AB	BB	AB	AA	AB	AA	AB	AB	AA	BB	AA	BB	BB	AB	BB	BB	AA	AB	AB	AB	AB	AA
1312	contig_37023	contig_37023_404959	16	36.639	36.639	AB	AB	AA	AB	AB	AA	BB	BB	AB	AB	AA	AB	AB	AB	AB	AB	BB	AB	AA	AB	BB	AA	AB	BB	AB	AA	AB	AA	AB	AB	AA	BB	AA	BB	BB	AB	BB	BB	AA	AB	AB	AB	AB	AA
1313	contig_37023	contig_37023_411727	16	34.626	34.626	AB	AB	AA	AB	AB	AA	BB	BB	AB	AB	AA	AB	AB	AB	AB	AB	BB	AB	AA	AB	BB	AA	AB	BB	AB	AA	AB	AA	AB	AB	AA	BB	AA	BB	BB	AB	BB	BB	AA	AB	AB	AB	AB	AA
1314	contig_37023	contig_37023_411958	16	34.626	34.626	AB	AB	AA	AB	AB	AA	BB	BB	AB	AB	AA	AB	AB	AB	AB	AB	BB	AB	AA	AB	BB	AA	AB	BB	AB	AA	AB	AA	AB	AB	AA	BB	AA	BB	BB	AB	BB	BB	AA	AB	AB	AB	AB	AA
1315	contig_37023	contig_37023_417680	16	34.626	34.626	AB	AB	AA	AB	AB	AA	BB	BB	AB	AB	AA	AB	AB	AB	AB	AB	BB	AB	AA	AB	BB	AA	AB	BB	AB	AA	AB	AA	AB	AB	AA	BB	AA	BB	BB	AB	BB	BB	AA	AB	AB	AB	AB	AA
1316	contig_37023	contig_37023_428769	16	34.626	34.626	AB	AB	AA	AB	AB	AA	BB	BB	AB	AB	AA	AB	AB	AB	AB	AB	BB	AB	AA	AB	BB	AA	AB	BB	AB	AA	AB	AA	AB	AB	AA	BB	AA	BB	BB	AB	BB	BB	AA	AB	AB	AB	AB	AA
1317	contig_37023	contig_37023_428819	16	34.626	34.626	AB	AB	AA	AB	AB	AA	BB	BB	AB	AB	AA	AB	AB	AB	AB	AB	BB	AB	AA	AB	BB	AA	AB	BB	AB	AA	AB	AA	AB	AB	AA	BB	AA	BB	BB	AB	BB	BB	AA	AB	AB	AB	AB	AA
1319	contig_37023	contig_37023_431812	16	34.626	34.626	AB	AB	AA	AB	AB	AA	BB	BB	AB	AB	AA	AB	AB	AB	AB	AB	BB	AB	AA	AB	BB	AA	AB	BB	AB	AA	AB	AA	AB	AB	AA	BB	AA	BB	BB	AB	BB	BB	AA	AB	AB	AB	AB	AA
1320	contig_37023	contig_37023_432233	16	34.626	34.626	AB	AB	AA	AB	AB	AA	BB	BB	AB	AB	AA	AB	AB	AB	AB	AB	BB	AB	AA	AB	BB	AA	AB	BB	AB	AA	AB	AA	AB	AB	AA	BB	AA	BB	BB	AB	BB	BB	AA	AB	AB	AB	AB	AA
1321	contig_37023	contig_37023_432247	16	34.626	34.626	AB	AB	AA	AB	AB	AA	BB	BB	AB	AB	AA	AB	AB	AB	AB	AB	BB	AB	AA	AB	BB	AA	AB	BB	AB	AA	AB	AA	AB	AB	AA	BB	AA	BB	BB	AB	BB	BB	AA	AB	AB	AB	AB	AA
1322	contig_37023	contig_37023_432318	16	36.639	36.639	AB	AB	AA	AB	AB	AA	BB	BB	AB	AB	AA	AB	AB	AB	AB	AB	BB	AB	AA	AB	BB	AA	AB	BB	AB	AA	AB	AA	AB	AB	AA	BB	AA	BB	BB	AB	BB	BB	AA	AB	AB	AB	AB	AA
1323	contig_37023	contig_37023_432467	16	34.626	34.626	AB	AB	AA	AB	AB	AA	BB	BB	AB	AB	AA	AB	AB	AB	AB	AB	BB	AB	AA	AB	BB	AA	AB	BB	AB	AA	AB	AA	AB	AB	AA	BB	AA	BB	BB	AB	BB	BB	AA	AB	AB	AB	AB	AA
1324	contig_37023	contig_37023_432520	16	34.626	34.626	AB	AB	AA	AB	AB	AA	BB	BB	AB	AB	AA	AB	AB	AB	AB	AB	BB	AB	AA	AB	BB	AA	AB	BB	AB	AA	AB	AA	AB	AB	AA	BB	AA	BB	BB	AB	BB	BB	AA	AB	AB	AB	AB	AA
1325	contig_37023	contig_37023_432521	16	34.626	34.626	AB	AB	AA	AB	AB	AA	BB	BB	AB	AB	AA	AB	AB	AB	AB	AB	BB	AB	AA	AB	BB	AA	AB	BB	AB	AA	AB	AA	AB	AB	AA	BB	AA	BB	BB	AB	BB	BB	AA	AB	AB	AB	AB	AA
1326	contig_37023	contig_37023_433290	16	36.639	36.639	AB	AB	AA	AB	AB	AA	BB	BB	AB	AB	AA	AB	AB	AB	AB	AB	BB	AB	AA	AB	BB	AA	AB	BB	AB	AA	AB	AA	AB	AB	AA	BB	AA	BB	BB	AB	BB	BB	AA	AB	AB	AB	AB	AA
1327	contig_37023	contig_37023_434903	16	36.639	36.639	AB	AB	AA	AB	AB	AA	BB	BB	AB	AB	AA	AB	AB	AB	AB	AB	BB	AB	AA	AB	BB	AA	AB	BB	AB	AA	AB	AA	AB	AB	AA	BB	AA	BB	BB	AB	BB	BB	AA	AB	AB	AB	AB	AA
1328	contig_37023	contig_37023_435001	16	34.626	34.626	AB	AB	AA	AB	AB	AA	BB	BB	AB	AB	AA	AB	AB	AB	AB	AB	BB	AB	AA	AB	BB	AA	AB	BB	AB	AA	AB	AA	AB	AB	AA	BB	AA	BB	BB	AB	BB	BB	AA	AB	AB	AB	AB	AA
1329	contig_37023	contig_37023_435030	16	34.626	34.626	AB	AB	AA	AB	AB	AA	BB	BB	AB	AB	AA	AB	AB	AB	AB	AB	BB	AB	AA	AB	BB	AA	AB	BB	AB	AA	AB	AA	AB	AB	AA	BB	AA	BB	BB	AB	BB	BB	AA	AB	AB	AB	AB	AA
1330	contig_37023	contig_37023_435069	16	34.626	34.626	AB	AB	AA	AB	AB	AA	BB	BB	AB	AB	AA	AB	AB	AB	AB	AB	BB	AB	AA	AB	BB	AA	AB	BB	AB	AA	AB	AA	AB	AB	AA	BB	AA	BB	BB	AB	BB	BB	AA	AB	AB	AB	AB	AA
1331	contig_37023	contig_37023_435977	16	34.626	34.626	AB	AB	AA	AB	AB	AA	BB	BB	AB	AB	AA	AB	AB	AB	AB	AB	BB	AB	AA	AB	BB	AA	AB	BB	AB	AA	AB	AA	AB	AB	AA	BB	AA	BB	BB	AB	BB	BB	AA	AB	AB	AB	AB	AA
1332	contig_37023	contig_37023_436044	16	34.626	34.626	AB	AB	AA	AB	AB	AA	BB	BB	AB	AB	AA	AB	AB	AB	AB	AB	BB	AB	AA	AB	BB	AA	AB	BB	AB	AA	AB	AA	AB	AB	AA	BB	AA	BB	BB	AB	BB	BB	AA	AB	AB	AB	AB	AA
1333	contig_37023	contig_37023_436186	16	34.626	34.626	AB	AB	AA	AB	AB	AA	BB	BB	AB	AB	AA	AB	AB	AB	AB	AB	BB	AB	AA	AB	BB	AA	AB	BB	AB	AA	AB	AA	AB	AB	AA	BB	AA	BB	BB	AB	BB	BB	AA	AB	AB	AB	AB	AA
1334	contig_37023	contig_37023_436192	16	34.626	34.626	AB	AB	AA	AB	AB	AA	BB	BB	AB	AB	AA	AB	AB	AB	AB	AB	BB	AB	AA	AB	BB	AA	AB	BB	AB	AA	AB	AA	AB	AB	AA	BB	AA	BB	BB	AB	BB	BB	AA	AB	AB	AB	AB	AA
1335	contig_37023	contig_37023_436293	16	34.626	34.626	AB	AB	AA	AB	AB	AA	BB	BB	AB	AB	AA	AB	AB	AB	AB	AB	BB	AB	AA	AB	BB	AA	AB	BB	AB	AA	AB	AA	AB	AB	AA	BB	AA	BB	BB	AB	BB	BB	AA	AB	AB	AB	AB	AA
1336	contig_37023	contig_37023_436338	16	34.626	34.626	AB	AB	AA	AB	AB	AA	BB	BB	AB	AB	AA	AB	AB	AB	AB	AB	BB	AB	AA	AB	BB	AA	AB	BB	AB	AA	AB	AA	AB	AB	AA	BB	AA	BB	BB	AB	BB	BB	AA	AB	AB	AB	AB	AA
1337	contig_37023	contig_37023_440332	16	34.626	34.626	AB	AB	AA	AB	AB	AA	BB	BB	AB	AB	AA	AB	AB	AB	AB	AB	BB	AB	AA	AB	BB	AA	AB	BB	AB	AA	AB	AA	AB	AB	AA	BB	AA	BB	BB	AB	BB	BB	AA	AB	AB	AB	AB	AA
1338	contig_37023	contig_37023_440464	16	34.626	34.626	AB	AB	AA	AB	AB	AA	BB	BB	AB	AB	AA	AB	AB	AB	AB	AB	BB	AB	AA	AB	BB	AA	AB	BB	AB	AA	AB	AA	AB	AB	AA	BB	AA	BB	BB	AB	BB	BB	AA	AB	AB	AB	AB	AA
1339	contig_37023	contig_37023_440478	16	34.626	34.626	AB	AB	AA	AB	AB	AA	BB	BB	AB	AB	AA	AB	AB	AB	AB	AB	BB	AB	AA	AB	BB	AA	AB	BB	AB	AA	AB	AA	AB	AB	AA	BB	AA	BB	BB	AB	BB	BB	AA	AB	AB	AB	AB	AA
1340	contig_37023	contig_37023_440499	16	34.626	34.626	AB	AB	AA	AB	AB	AA	BB	BB	AB	AB	AA	AB	AB	AB	AB	AB	BB	AB	AA	AB	BB	AA	AB	BB	AB	AA	AB	AA	AB	AB	AA	BB	AA	BB	BB	AB	BB	BB	AA	AB	AB	AB	AB	AA
1341	contig_37023	contig_37023_440541	16	36.639	36.639	AB	AB	AA	AB	AB	AA	BB	BB	AB	AB	AA	AB	AB	AB	AB	AB	BB	AB	AA	AB	BB	AA	AB	BB	AB	AA	AB	AA	AB	AB	AA	BB	AA	BB	BB	AB	BB	BB	AA	AB	AB	AB	AB	AA
1342	contig_37023	contig_37023_451455	16	36.639	36.639	AB	AB	AA	AB	AB	AA	BB	BB	AB	AB	AA	AB	AB	AB	AB	AB	BB	AB	AA	AB	BB	AA	AB	BB	AB	AA	AB	AA	AB	AB	AA	BB	AA	BB	BB	AB	BB	BB	AA	AB	AB	AB	AB	AA
1343	contig_37023	contig_37023_451572	16	36.639	36.639	AB	AB	AA	AB	AB	AA	BB	BB	AB	AB	AA	AB	AB	AB	AB	AB	BB	AB	AA	AB	BB	AA	AB	BB	AB	AA	AB	AA	AB	AB	AA	BB	AA	BB	BB	AB	BB	BB	AA	AB	AB	AB	AB	AA
1344	contig_37023	contig_37023_457563	16	34.626	34.626	AB	AB	AA	AB	AB	AA	BB	BB	AB	AB	AA	AB	AB	AB	AB	AB	BB	AB	AA	AB	BB	AA	AB	BB	AB	AA	AB	AA	AB	AB	AA	BB	AA	BB	BB	AB	BB	BB	AA	AB	AB	AB	AB	AA
1346	contig_37023	contig_37023_464694	16	34.626	34.626	AB	AB	AA	AB	AB	AA	BB	BB	AB	AB	AA	AB	AB	AB	AB	AB	BB	AB	AA	AB	BB	AA	AB	BB	AB	AA	AB	AA	AB	AB	AA	BB	AA	BB	BB	AB	BB	BB	AA	AB	AB	AB	AB	AA
1347	contig_37023	contig_37023_496634	16	34.626	34.626	AB	AB	AA	AB	AB	AA	BB	BB	AB	AB	AA	AB	AB	AB	AB	AB	BB	AB	AA	AB	BB	AA	AB	BB	AB	AA	AB	AA	AB	AB	AA	BB	AA	BB	BB	AB	BB	BB	AA	AB	AB	AB	AB	AA
1348	contig_37023	contig_37023_496808	16	34.626	34.626	AB	AB	AA	AB	AB	AA	BB	BB	AB	AB	AA	AB	AB	AB	AB	AB	BB	AB	AA	AB	BB	AA	AB	BB	AB	AA	AB	AA	AB	AB	AA	BB	AA	BB	BB	AB	BB	BB	AA	AB	AB	AB	AB	AA
1349	contig_37023	contig_37023_496900	16	34.626	34.626	AB	AB	AA	AB	AB	AA	BB	BB	AB	AB	AA	AB	AB	AB	AB	AB	BB	AB	AA	AB	BB	AA	AB	BB	AB	AA	AB	AA	AB	AB	AA	BB	AA	BB	BB	AB	BB	BB	AA	AB	AB	AB	AB	AA
1350	contig_37023	contig_37023_498249	16	34.626	34.626	AB	AB	AA	AB	AB	AA	BB	BB	AB	AB	AA	AB	AB	AB	AB	AB	BB	AB	AA	AB	BB	AA	AB	BB	AB	AA	AB	AA	AB	AB	AA	BB	AA	BB	BB	AB	BB	BB	AA	AB	AB	AB	AB	AA
1351	contig_37023	contig_37023_499884	16	36.639	36.639	AB	AB	AA	AB	AB	AA	BB	BB	AB	AB	AA	AB	AB	AB	AB	AB	BB	AB	AA	AB	BB	AA	AB	BB	AB	AA	AB	AA	AB	AB	AA	BB	AA	BB	BB	AB	BB	BB	AA	AB	AB	AB	AB	AA
1352	contig_37023	contig_37023_512102	16	34.626	34.626	AB	AB	AA	AB	AB	AA	BB	BB	AB	AB	AA	AB	AB	AB	AB	AB	BB	AB	AA	AB	BB	AA	AB	BB	AB	AA	AB	AA	AB	AB	AA	BB	AA	BB	BB	AB	BB	BB	AA	AB	AB	AB	AB	AA
1353	contig_37023	contig_37023_512249	16	34.626	34.626	AB	AB	AA	AB	AB	AA	BB	BB	AB	AB	AA	AB	AB	AB	AB	AB	BB	AB	AA	AB	BB	AA	AB	BB	AB	AA	AB	AA	AB	AB	AA	BB	AA	BB	BB	AB	BB	BB	AA	AB	AB	AB	AB	AA
1354	contig_37023	contig_37023_512914	16	34.626	34.626	AB	AB	AA	AB	AB	AA	BB	BB	AB	AB	AA	AB	AB	AB	AB	AB	BB	AB	AA	AB	BB	AA	AB	BB	AB	AA	AB	AA	AB	AB	AA	BB	AA	BB	BB	AB	BB	BB	AA	AB	AB	AB	AB	AA
1355	contig_37023	contig_37023_513278	16	34.626	34.626	AB	AB	AA	AB	AB	AA	BB	BB	AB	AB	AA	AB	AB	AB	AB	AB	BB	AB	AA	AB	BB	AA	AB	BB	AB	AA	AB	AA	AB	AB	AA	BB	AA	BB	BB	AB	BB	BB	AA	AB	AB	AB	AB	AA
1356	contig_37023	contig_37023_513285	16	34.626	34.626	AB	AB	AA	AB	AB	AA	BB	BB	AB	AB	AA	AB	AB	AB	AB	AB	BB	AB	AA	AB	BB	AA	AB	BB	AB	AA	AB	AA	AB	AB	AA	BB	AA	BB	BB	AB	BB	BB	AA	AB	AB	AB	AB	AA
1357	contig_37023	contig_37023_513370	16	34.626	34.626	AB	AB	AA	AB	AB	AA	BB	BB	AB	AB	AA	AB	AB	AB	AB	AB	BB	AB	AA	AB	BB	AA	AB	BB	AB	AA	AB	AA	AB	AB	AA	BB	AA	BB	BB	AB	BB	BB	AA	AB	AB	AB	AB	AA
1358	contig_37023	contig_37023_515656	16	34.626	34.626	AB	AB	AA	AB	AB	AA	BB	BB	AB	AB	AA	AB	AB	AB	AB	AB	BB	AB	AA	AB	BB	AA	AB	BB	AB	AA	AB	AA	AB	AB	AA	BB	AA	BB	BB	AB	BB	BB	AA	AB	AB	AB	AB	AA
1359	contig_37023	contig_37023_515846	16	34.626	34.626	AB	AB	AA	AB	AB	AA	BB	BB	AB	AB	AA	AB	AB	AB	AB	AB	BB	AB	AA	AB	BB	AA	AB	BB	AB	AA	AB	AA	AB	AB	AA	BB	AA	BB	BB	AB	BB	BB	AA	AB	AB	AB	AB	AA
1361	contig_37023	contig_37023_530053	16	34.626	34.626	AB	AB	AA	AB	AB	AA	BB	BB	AB	AB	AA	AB	AB	AB	AB	AB	BB	AB	AA	AB	BB	AA	AB	BB	AB	AA	AB	AA	AB	AB	AA	BB	AA	BB	BB	AB	BB	BB	AA	AB	AB	AB	AB	AA
1362	contig_37023	contig_37023_530126	16	34.626	34.626	AB	AB	AA	AB	AB	AA	BB	BB	AB	AB	AA	AB	AB	AB	AB	AB	BB	AB	AA	AB	BB	AA	AB	BB	AB	AA	AB	AA	AB	AB	AA	BB	AA	BB	BB	AB	BB	BB	AA	AB	AB	AB	AB	AA
1363	contig_37023	contig_37023_531772	16	34.626	34.626	AB	AB	AA	AB	AB	AA	BB	BB	AB	AB	AA	AB	AB	AB	AB	AB	BB	AB	AA	AB	BB	AA	AB	BB	AB	AA	AB	AA	AB	AB	AA	BB	AA	BB	BB	AB	BB	BB	AA	AB	AB	AB	AB	AA
1364	contig_37023	contig_37023_531932	16	34.626	34.626	AB	AB	AA	AB	AB	AA	BB	BB	AB	AB	AA	AB	AB	AB	AB	AB	BB	AB	AA	AB	BB	AA	AB	BB	AB	AA	AB	AA	AB	AB	AA	BB	AA	BB	BB	AB	BB	BB	AA	AB	AB	AB	AB	AA
1365	contig_37023	contig_37023_533203	16	34.626	34.626	AB	AB	AA	AB	AB	AA	BB	BB	AB	AB	AA	AB	AB	AB	AB	AB	BB	AB	AA	AB	BB	AA	AB	BB	AB	AA	AB	AA	AB	AB	AA	BB	AA	BB	BB	AB	BB	BB	AA	AB	AB	AB	AB	AA
1366	contig_37023	contig_37023_536850	16	34.626	34.626	AB	AB	AA	AB	AB	AA	BB	BB	AB	AB	AA	AB	AB	AB	AB	AB	BB	AB	AA	AB	BB	AA	AB	BB	AB	AA	AB	AA	AB	AB	AA	BB	AA	BB	BB	AB	BB	BB	AA	AB	AB	AB	AB	AA
1367	contig_37023	contig_37023_547426	16	36.639	36.639	AB	AB	AA	AB	AB	AA	BB	BB	AB	AB	AA	AB	AB	AB	AB	AB	BB	AB	AA	AB	BB	AA	AB	BB	AB	AA	AB	AA	AB	AB	AA	BB	AA	BB	BB	AB	BB	BB	AA	AB	AB	AB	AB	AA
1368	contig_37023	contig_37023_550434	16	34.626	34.626	AB	AB	AA	AB	AB	AA	BB	BB	AB	AB	AA	AB	AB	AB	AB	AB	BB	AB	AA	AB	BB	AA	AB	BB	AB	AA	AB	AA	AB	AB	AA	BB	AA	BB	BB	AB	BB	BB	AA	AB	AB	AB	AB	AA
1369	contig_37023	contig_37023_554850	16	36.639	36.639	AB	AB	AA	AB	AB	AA	BB	BB	AB	AB	AA	AB	AB	AB	AB	AB	BB	AB	AA	AB	BB	AA	AB	BB	AB	AA	AB	AA	AB	AB	AA	BB	AA	BB	BB	AB	BB	BB	AA	AB	AB	AB	AB	AA
1370	contig_37023	contig_37023_555013	16	34.626	34.626	AB	AB	AA	AB	AB	AA	BB	BB	AB	AB	AA	AB	AB	AB	AB	AB	BB	AB	AA	AB	BB	AA	AB	BB	AB	AA	AB	AA	AB	AB	AA	BB	AA	BB	BB	AB	BB	BB	AA	AB	AB	AB	AB	AA
1371	contig_37023	contig_37023_555028	16	34.626	34.626	AB	AB	AA	AB	AB	AA	BB	BB	AB	AB	AA	AB	AB	AB	AB	AB	BB	AB	AA	AB	BB	AA	AB	BB	AB	AA	AB	AA	AB	AB	AA	BB	AA	BB	BB	AB	BB	BB	AA	AB	AB	AB	AB	AA
1372	contig_37023	contig_37023_555105	16	34.626	34.626	AB	AB	AA	AB	AB	AA	BB	BB	AB	AB	AA	AB	AB	AB	AB	AB	BB	AB	AA	AB	BB	AA	AB	BB	AB	AA	AB	AA	AB	AB	AA	BB	AA	BB	BB	AB	BB	BB	AA	AB	AB	AB	AB	AA
1373	contig_37023	contig_37023_555110	16	34.626	34.626	AB	AB	AA	AB	AB	AA	BB	BB	AB	AB	AA	AB	AB	AB	AB	AB	BB	AB	AA	AB	BB	AA	AB	BB	AB	AA	AB	AA	AB	AB	AA	BB	AA	BB	BB	AB	BB	BB	AA	AB	AB	AB	AB	AA
1374	contig_37023	contig_37023_555200	16	34.626	34.626	AB	AB	AA	AB	AB	AA	BB	BB	AB	AB	AA	AB	AB	AB	AB	AB	BB	AB	AA	AB	BB	AA	AB	BB	AB	AA	AB	AA	AB	AB	AA	BB	AA	BB	BB	AB	BB	BB	AA	AB	AB	AB	AB	AA
1377	contig_37023	contig_37023_556676	16	34.626	34.626	AB	AB	AA	AB	AB	AA	BB	BB	AB	AB	AA	AB	AB	AB	AB	AB	BB	AB	AA	AB	BB	AA	AB	BB	AB	AA	AB	AA	AB	AB	AA	BB	AA	BB	BB	AB	BB	BB	AA	AB	AB	AB	AB	AA
1378	contig_37023	contig_37023_556850	16	31.27	31.27	AB	AB	AA	AB	AB	AA	BB	BB	BB	AB	AA	AB	AB	AB	AB	AB	BB	AB	AA	AB	BB	AA	AB	BB	BB	AA	AB	AA	AB	AB	AA	AB	AA	BB	BB	AB	BB	BB	AA	AB	AB	AB	AB	AA
1379	contig_37023	contig_37023_556941	16	34.626	34.626	AB	AB	AA	AB	AB	AA	BB	BB	AB	AB	AA	AB	AB	AB	AB	AB	BB	AB	AA	AB	BB	AA	AB	BB	AB	AA	AB	AA	AB	AB	AA	BB	AA	BB	BB	AB	BB	BB	AA	AB	AB	AB	AB	AA
1380	contig_37023	contig_37023_556964	16	34.626	34.626	AB	AB	AA	AB	AB	AA	BB	BB	AB	AB	AA	AB	AB	AB	AB	AB	BB	AB	AA	AB	BB	AA	AB	BB	AB	AA	AB	AA	AB	AB	AA	BB	AA	BB	BB	AB	BB	BB	AA	AB	AB	AB	AB	AA
1381	contig_37023	contig_37023_557000	16	34.626	34.626	AB	AB	AA	AB	AB	AA	BB	BB	AB	AB	AA	AB	AB	AB	AB	AB	BB	AB	AA	AB	BB	AA	AB	BB	AB	AA	AB	AA	AB	AB	AA	BB	AA	BB	BB	AB	BB	BB	AA	AB	AB	AB	AB	AA
1382	contig_37023	contig_37023_557021	16	34.626	34.626	AB	AB	AA	AB	AB	AA	BB	BB	AB	AB	AA	AB	AB	AB	AB	AB	BB	AB	AA	AB	BB	AA	AB	BB	AB	AA	AB	AA	AB	AB	AA	BB	AA	BB	BB	AB	BB	BB	AA	AB	AB	AB	AB	AA
1383	contig_37023	contig_37023_557032	16	34.626	34.626	AB	AB	AA	AB	AB	AA	BB	BB	AB	AB	AA	AB	AB	AB	AB	AB	BB	AB	AA	AB	BB	AA	AB	BB	AB	AA	AB	AA	AB	AB	AA	BB	AA	BB	BB	AB	BB	BB	AA	AB	AB	AB	AB	AA
1384	contig_37023	contig_37023_563407	16	34.626	34.626	AB	AB	AA	AB	AB	AA	BB	BB	AB	AB	AA	AB	AB	AB	AB	AB	BB	AB	AA	AB	BB	AA	AB	BB	AB	AA	AB	AA	AB	AB	AA	BB	AA	BB	BB	AB	BB	BB	AA	AB	AB	AB	AB	AA
1385	contig_37023	contig_37023_568933	16	34.626	34.626	AB	AB	AA	AB	AB	AA	BB	BB	AB	AB	AA	AB	AB	AB	AB	AB	BB	AB	AA	AB	BB	AA	AB	BB	AB	AA	AB	AA	AB	AB	AA	BB	AA	BB	BB	AB	BB	BB	AA	AB	AB	AB	AB	AA
1386	contig_37023	contig_37023_568934	16	34.626	34.626	AB	AB	AA	AB	AB	AA	BB	BB	AB	AB	AA	AB	AB	AB	AB	AB	BB	AB	AA	AB	BB	AA	AB	BB	AB	AA	AB	AA	AB	AB	AA	BB	AA	BB	BB	AB	BB	BB	AA	AB	AB	AB	AB	AA
1387	contig_37023	contig_37023_568940	16	34.626	34.626	AB	AB	AA	AB	AB	AA	BB	BB	AB	AB	AA	AB	AB	AB	AB	AB	BB	AB	AA	AB	BB	AA	AB	BB	AB	AA	AB	AA	AB	AB	AA	BB	AA	BB	BB	AB	BB	BB	AA	AB	AB	AB	AB	AA
1388	contig_37023	contig_37023_569660	16	36.639	36.639	AB	AB	AA	AB	AB	AA	BB	BB	AB	AB	AA	AB	AB	AB	AB	AB	BB	AB	AA	AB	BB	AA	AB	BB	AB	AA	AB	AA	AB	AB	AA	BB	AA	BB	BB	AB	BB	BB	AA	AB	AB	AB	AB	AA
1389	contig_37023	contig_37023_574009	16	36.639	36.639	AB	AB	AA	AB	AB	AA	BB	BB	AB	AB	AA	AB	AB	AB	AB	AB	BB	AB	AA	AB	BB	AA	AB	BB	AB	AA	AB	AA	AB	AB	AA	BB	AA	BB	BB	AB	BB	BB	AA	AB	AB	AB	AB	AA
1390	contig_37023	contig_37023_582008	16	34.626	34.626	AB	AB	AA	AB	AB	AA	BB	BB	AB	AB	AA	AB	AB	AB	AB	AB	BB	AB	AA	AB	BB	AA	AB	BB	AB	AA	AB	AA	AB	AB	AA	BB	AA	BB	BB	AB	BB	BB	AA	AB	AB	AB	AB	AA
1393	contig_37023	contig_37023_582914	16	34.626	34.626	AB	AB	AA	AB	AB	AA	BB	BB	AB	AB	AA	AB	AB	AB	AB	AB	BB	AB	AA	AB	BB	AA	AB	BB	AB	AA	AB	AA	AB	AB	AA	BB	AA	BB	BB	AB	BB	BB	AA	AB	AB	AB	AB	AA
1395	contig_37023	contig_37023_586069	16	36.639	36.639	AB	AB	AA	AB	AB	AA	BB	BB	AB	AB	AA	AB	AB	AB	AB	AB	BB	AB	AA	AB	BB	AA	AB	BB	AB	AA	AB	AA	AB	AB	AA	BB	AA	BB	BB	AB	BB	BB	AA	AB	AB	AB	AB	AA
1396	contig_37023	contig_37023_591105	16	34.626	34.626	AB	AB	AA	AB	AB	AA	BB	BB	AB	AB	AA	AB	AB	AB	AB	AB	BB	AB	AA	AB	BB	AA	AB	BB	AB	AA	AB	AA	AB	AB	AA	BB	AA	BB	BB	AB	BB	BB	AA	AB	AB	AB	AB	AA
1398	contig_37023	contig_37023_606888	16	36.639	36.639	AB	AB	AA	AB	AB	AA	BB	BB	AB	AB	AA	AB	AB	AB	AB	AB	BB	AB	AA	AB	BB	AA	AB	BB	AB	AA	AB	AA	AB	AB	AA	BB	AA	BB	BB	AB	BB	BB	AA	AB	AB	AB	AB	AA
1399	contig_37023	contig_37023_606929	16	36.639	36.639	AB	AB	AA	AB	AB	AA	BB	BB	AB	AB	AA	AB	AB	AB	AB	AB	BB	AB	AA	AB	BB	AA	AB	BB	AB	AA	AB	AA	AB	AB	AA	BB	AA	BB	BB	AB	BB	BB	AA	AB	AB	AB	AB	AA
1400	contig_37023	contig_37023_607111	16	36.639	36.639	AB	AB	AA	AB	AB	AA	BB	BB	AB	AB	AA	AB	AB	AB	AB	AB	BB	AB	AA	AB	BB	AA	AB	BB	AB	AA	AB	AA	AB	AB	AA	BB	AA	BB	BB	AB	BB	BB	AA	AB	AB	AB	AB	AA
1401	contig_37023	contig_37023_609671	16	34.626	34.626	AB	AB	AA	AB	AB	AA	BB	BB	AB	AB	AA	AB	AB	AB	AB	AB	BB	AB	AA	AB	BB	AA	AB	BB	AB	AA	AB	AA	AB	AB	AA	BB	AA	BB	BB	AB	BB	BB	AA	AB	AB	AB	AB	AA
1402	contig_37023	contig_37023_610068	16	36.639	36.639	AB	AB	AA	AB	AB	AA	BB	BB	AB	AB	AA	AB	AB	AB	AB	AB	BB	AB	AA	AB	BB	AA	AB	BB	AB	AA	AB	AA	AB	AB	AA	BB	AA	BB	BB	AB	BB	BB	AA	AB	AB	AB	AB	AA
1403	contig_37023	contig_37023_613192	16	34.626	34.626	AB	AB	AA	AB	AB	AA	BB	BB	AB	AB	AA	AB	AB	AB	AB	AB	BB	AB	AA	AB	BB	AA	AB	BB	AB	AA	AB	AA	AB	AB	AA	BB	AA	BB	BB	AB	BB	BB	AA	AB	AB	AB	AB	AA
1404	contig_37023	contig_37023_613196	16	34.626	34.626	AB	AB	AA	AB	AB	AA	BB	BB	AB	AB	AA	AB	AB	AB	AB	AB	BB	AB	AA	AB	BB	AA	AB	BB	AB	AA	AB	AA	AB	AB	AA	BB	AA	BB	BB	AB	BB	BB	AA	AB	AB	AB	AB	AA
1406	contig_37023	contig_37023_616224	16	34.626	34.626	AB	AB	AA	AB	AB	AA	BB	BB	AB	AB	AA	AB	AB	AB	AB	AB	BB	AB	AA	AB	BB	AA	AB	BB	AB	AA	AB	AA	AB	AB	AA	BB	AA	BB	BB	AB	BB	BB	AA	AB	AB	AB	AB	AA
1407	contig_37023	contig_37023_616256	16	36.639	36.639	AB	AB	AA	AB	AB	AA	BB	BB	AB	AB	AA	AB	AB	AB	AB	AB	BB	AB	AA	AB	BB	AA	AB	BB	AB	AA	AB	AA	AB	AB	AA	BB	AA	BB	BB	AB	BB	BB	AA	AB	AB	AB	AB	AA
1408	contig_37023	contig_37023_616416	16	34.626	34.626	AB	AB	AA	AB	AB	AA	BB	BB	AB	AB	AA	AB	AB	AB	AB	AB	BB	AB	AA	AB	BB	AA	AB	BB	AB	AA	AB	AA	AB	AB	AA	BB	AA	BB	BB	AB	BB	BB	AA	AB	AB	AB	AB	AA
1409	contig_37023	contig_37023_616760	16	34.626	34.626	AB	AB	AA	AB	AB	AA	BB	BB	AB	AB	AA	AB	AB	AB	AB	AB	BB	AB	AA	AB	BB	AA	AB	BB	AB	AA	AB	AA	AB	AB	AA	BB	AA	BB	BB	AB	BB	BB	AA	AB	AB	AB	AB	AA
1410	contig_37023	contig_37023_616781	16	36.639	36.639	AB	AB	AA	AB	AB	AA	BB	BB	AB	AB	AA	AB	AB	AB	AB	AB	BB	AB	AA	AB	BB	AA	AB	BB	AB	AA	AB	AA	AB	AB	AA	BB	AA	BB	BB	AB	BB	BB	AA	AB	AB	AB	AB	AA
1411	contig_37023	contig_37023_616948	16	34.626	34.626	AB	AB	AA	AB	AB	AA	BB	BB	AB	AB	AA	AB	AB	AB	AB	AB	BB	AB	AA	AB	BB	AA	AB	BB	AB	AA	AB	AA	AB	AB	AA	BB	AA	BB	BB	AB	BB	BB	AA	AB	AB	AB	AB	AA
1412	contig_37023	contig_37023_618469	16	34.626	34.626	AB	AB	AA	AB	AB	AA	BB	BB	AB	AB	AA	AB	AB	AB	AB	AB	BB	AB	AA	AB	BB	AA	AB	BB	AB	AA	AB	AA	AB	AB	AA	BB	AA	BB	BB	AB	BB	BB	AA	AB	AB	AB	AB	AA
1413	contig_37023	contig_37023_618627	16	34.626	34.626	AB	AB	AA	AB	AB	AA	BB	BB	AB	AB	AA	AB	AB	AB	AB	AB	BB	AB	AA	AB	BB	AA	AB	BB	AB	AA	AB	AA	AB	AB	AA	BB	AA	BB	BB	AB	BB	BB	AA	AB	AB	AB	AB	AA
1415	contig_37023	contig_37023_628703	16	36.639	36.639	AB	AB	AA	AB	AB	AA	BB	BB	AB	AB	AA	AB	AB	AB	AB	AB	BB	AB	AA	AB	BB	AA	AB	BB	AB	AA	AB	AA	AB	AB	AA	BB	AA	BB	BB	AB	BB	BB	AA	AB	AB	AB	AB	AA
1416	contig_37023	contig_37023_637573	16	35.297	35.297	AB	AB	AA	AB	AB	AA	BB	BB	AB	AB	AA	AB	AB	AB	AB	AB	BB	AB	AA	AB	BB	AA	AB	BB	AB	AA	AB	AA	AB	AB	AA	BB	AA	BB	BB	AB	BB	BB	AA	AB	AB	AB	AB	AA
1417	contig_37023	contig_37023_637956	16	35.297	35.297	AB	AB	AA	AB	AB	AA	BB	BB	AB	AB	AA	AB	AB	AB	AB	AB	BB	AB	AA	AB	BB	AA	AB	BB	AB	AA	AB	AA	AB	AB	AA	BB	AA	BB	BB	AB	BB	BB	AA	AB	AB	AB	AB	AA
1418	contig_37023	contig_37023_638732	16	36.639	36.639	AB	AB	AA	AB	AB	AA	BB	BB	AB	AB	AA	AB	AB	AB	AB	AB	BB	AB	AA	AB	BB	AA	AB	BB	AB	AA	AB	AA	AB	AB	AA	BB	AA	BB	BB	AB	BB	BB	AA	AB	AB	AB	AB	AA
1419	contig_37023	contig_37023_645893	16	34.626	34.626	AB	AB	AA	AB	AB	AA	BB	BB	AB	AB	AA	AB	AB	AB	AB	AB	BB	AB	AA	AB	BB	AA	AB	BB	AB	AA	AB	AA	AB	AB	AA	BB	AA	BB	BB	AB	BB	BB	AA	AB	AB	AB	AB	AA
1420	contig_37023	contig_37023_646148	16	34.626	34.626	AB	AB	AA	AB	AB	AA	BB	BB	AB	AB	AA	AB	AB	AB	AB	AB	BB	AB	AA	AB	BB	AA	AB	BB	AB	AA	AB	AA	AB	AB	AA	BB	AA	BB	BB	AB	BB	BB	AA	AB	AB	AB	AB	AA
1421	contig_37023	contig_37023_647395	16	34.626	34.626	AB	AB	AA	AB	AB	AA	BB	BB	AB	AB	AA	AB	AB	AB	AB	AB	BB	AB	AA	AB	BB	AA	AB	BB	AB	AA	AB	AA	AB	AB	AA	BB	AA	BB	BB	AB	BB	BB	AA	AB	AB	AB	AB	AA
1422	contig_37023	contig_37023_647401	16	34.626	34.626	AB	AB	AA	AB	AB	AA	BB	BB	AB	AB	AA	AB	AB	AB	AB	AB	BB	AB	AA	AB	BB	AA	AB	BB	AB	AA	AB	AA	AB	AB	AA	BB	AA	BB	BB	AB	BB	BB	AA	AB	AB	AB	AB	AA
1423	contig_37023	contig_37023_647542	16	36.639	36.639	AB	AB	AA	AB	AB	AA	BB	BB	AB	AB	AA	AB	AB	AB	AB	AB	BB	AB	AA	AB	BB	AA	AB	BB	AB	AA	AB	AA	AB	AB	AA	BB	AA	BB	BB	AB	BB	BB	AA	AB	AB	AB	AB	AA
1424	contig_37023	contig_37023_647639	16	34.626	34.626	AB	AB	AA	AB	AB	AA	BB	BB	AB	AB	AA	AB	AB	AB	AB	AB	BB	AB	AA	AB	BB	AA	AB	BB	AB	AA	AB	AA	AB	AB	AA	BB	AA	BB	BB	AB	BB	BB	AA	AB	AB	AB	AB	AA
1425	contig_37023	contig_37023_647642	16	36.639	36.639	AB	AB	AA	AB	AB	AA	BB	BB	AB	AB	AA	AB	AB	AB	AB	AB	BB	AB	AA	AB	BB	AA	AB	BB	AB	AA	AB	AA	AB	AB	AA	BB	AA	BB	BB	AB	BB	BB	AA	AB	AB	AB	AB	AA
1426	contig_37023	contig_37023_654013	16	36.639	36.639	AB	AB	AA	AB	AB	AA	BB	BB	AB	AB	AA	AB	AB	AB	AB	AB	BB	AB	AA	AB	BB	AA	AB	BB	AB	AA	AB	AA	AB	AB	AA	BB	AA	BB	BB	AB	BB	BB	AA	AB	AB	AB	AB	AA
1428	contig_37023	contig_37023_656855	16	34.626	34.626	AB	AB	AA	AB	AB	AA	BB	BB	AB	AB	AA	AB	AB	AB	AB	AB	BB	AB	AA	AB	BB	AA	AB	BB	AB	AA	AB	AA	AB	AB	AA	BB	AA	BB	BB	AB	BB	BB	AA	AB	AB	AB	AB	AA
1429	contig_37023	contig_37023_657142	16	34.626	34.626	AB	AB	AA	AB	AB	AA	BB	BB	AB	AB	AA	AB	AB	AB	AB	AB	BB	AB	AA	AB	BB	AA	AB	BB	AB	AA	AB	AA	AB	AB	AA	BB	AA	BB	BB	AB	BB	BB	AA	AB	AB	AB	AB	AA
1431	contig_37023	contig_37023_657237	16	34.626	34.626	AB	AB	AA	AB	AB	AA	BB	BB	AB	AB	AA	AB	AB	AB	AB	AB	BB	AB	AA	AB	BB	AA	AB	BB	AB	AA	AB	AA	AB	AB	AA	BB	AA	BB	BB	AB	BB	BB	AA	AB	AB	AB	AB	AA
1432	contig_37023	contig_37023_657309	16	34.626	34.626	AB	AB	AA	AB	AB	AA	BB	BB	AB	AB	AA	AB	AB	AB	AB	AB	BB	AB	AA	AB	BB	AA	AB	BB	AB	AA	AB	AA	AB	AB	AA	BB	AA	BB	BB	AB	BB	BB	AA	AB	AB	AB	AB	AA
1434	contig_37023	contig_37023_657825	16	34.626	34.626	AB	AB	AA	AB	AB	AA	BB	BB	AB	AB	AA	AB	AB	AB	AB	AB	BB	AB	AA	AB	BB	AA	AB	BB	AB	AA	AB	AA	AB	AB	AA	BB	AA	BB	BB	AB	BB	BB	AA	AB	AB	AB	AB	AA
1437	contig_37023	contig_37023_669430	16	36.639	36.639	AB	AB	AA	AB	AB	AA	BB	BB	AB	AB	AA	AB	AB	AB	AB	AB	BB	AB	AA	AB	BB	AA	AB	BB	AB	AA	AB	AA	AB	AB	AA	BB	AA	BB	BB	AB	BB	BB	AA	AB	AB	AB	AB	AA
1438	contig_37023	contig_37023_673511	16	36.639	36.639	AB	AB	AA	AB	AB	AA	BB	BB	AB	AB	AA	AB	AB	AB	AB	AB	BB	AB	AA	AB	BB	AA	AB	BB	AB	AA	AB	AA	AB	AB	AA	BB	AA	BB	BB	AB	BB	BB	AA	AB	AB	AB	AB	AA
1439	contig_37023	contig_37023_673555	16	36.639	36.639	AB	AB	AA	AB	AB	AA	BB	BB	AB	AB	AA	AB	AB	AB	AB	AB	BB	AB	AA	AB	BB	AA	AB	BB	AB	AA	AB	AA	AB	AB	AA	BB	AA	BB	BB	AB	BB	BB	AA	AB	AB	AB	AB	AA
1442	contig_37023	contig_37023_678303	16	34.626	34.626	AB	AB	AA	AB	AB	AA	BB	BB	AB	AB	AA	AB	AB	AB	AB	AB	BB	AB	AA	AB	BB	AA	AB	BB	AB	AA	AB	AA	AB	AB	AA	BB	AA	BB	BB	AB	BB	BB	AA	AB	AB	AB	AB	AA
1443	contig_37023	contig_37023_682593	16	36.639	36.639	AB	AB	AA	AB	AB	AA	BB	BB	AB	AB	AA	AB	AB	AB	AB	AB	BB	AB	AA	AB	BB	AA	AB	BB	AB	AA	AB	AA	AB	AB	AA	BB	AA	BB	BB	AB	BB	BB	AA	AB	AB	AB	AB	AA
1444	contig_37023	contig_37023_682868	16	36.639	36.639	AB	AB	AA	AB	AB	AA	BB	BB	AB	AB	AA	AB	AB	AB	AB	AB	BB	AB	AA	AB	BB	AA	AB	BB	AB	AA	AB	AA	AB	AB	AA	BB	AA	BB	BB	AB	BB	BB	AA	AB	AB	AB	AB	AA
1445	contig_37023	contig_37023_682875	16	34.626	34.626	AB	AB	AA	AB	AB	AA	BB	BB	AB	AB	AA	AB	AB	AB	AB	AB	BB	AB	AA	AB	BB	AA	AB	BB	AB	AA	AB	AA	AB	AB	AA	BB	AA	BB	BB	AB	BB	BB	AA	AB	AB	AB	AB	AA
1446	contig_37023	contig_37023_682962	16	36.639	36.639	AB	AB	AA	AB	AB	AA	BB	BB	AB	AB	AA	AB	AB	AB	AB	AB	BB	AB	AA	AB	BB	AA	AB	BB	AB	AA	AB	AA	AB	AB	AA	BB	AA	BB	BB	AB	BB	BB	AA	AB	AB	AB	AB	AA
1447	contig_37023	contig_37023_682992	16	36.639	36.639	AB	AB	AA	AB	AB	AA	BB	BB	AB	AB	AA	AB	AB	AB	AB	AB	BB	AB	AA	AB	BB	AA	AB	BB	AB	AA	AB	AA	AB	AB	AA	BB	AA	BB	BB	AB	BB	BB	AA	AB	AB	AB	AB	AA
1448	contig_37023	contig_37023_683515	16	36.639	36.639	AB	AB	AA	AB	AB	AA	BB	BB	AB	AB	AA	AB	AB	AB	AB	AB	BB	AB	AA	AB	BB	AA	AB	BB	AB	AA	AB	AA	AB	AB	AA	BB	AA	BB	BB	AB	BB	BB	AA	AB	AB	AB	AB	AA
1449	contig_37023	contig_37023_686860	16	36.639	36.639	AB	AB	AA	AB	AB	AA	BB	BB	AB	AB	AA	AB	AB	AB	AB	AB	BB	AB	AA	AB	BB	AA	AB	BB	AB	AA	AB	AA	AB	AB	AA	BB	AA	BB	BB	AB	BB	BB	AA	AB	AB	AB	AB	AA
1450	contig_37023	contig_37023_686876	16	36.639	36.639	AB	AB	AA	AB	AB	AA	BB	BB	AB	AB	AA	AB	AB	AB	AB	AB	BB	AB	AA	AB	BB	AA	AB	BB	AB	AA	AB	AA	AB	AB	AA	BB	AA	BB	BB	AB	BB	BB	AA	AB	AB	AB	AB	AA
1452	contig_37023	contig_37023_689262	16	36.639	36.639	AB	AB	AA	AB	AB	AA	BB	BB	AB	AB	AA	AB	AB	AB	AB	AB	BB	AB	AA	AB	BB	AA	AB	BB	AB	AA	AB	AA	AB	AB	AA	BB	AA	BB	BB	AB	BB	BB	AA	AB	AB	AB	AB	AA
1453	contig_37023	contig_37023_689509	16	36.639	36.639	AB	AB	AA	AB	AB	AA	BB	BB	AB	AB	AA	AB	AB	AB	AB	AB	BB	AB	AA	AB	BB	AA	AB	BB	AB	AA	AB	AA	AB	AB	AA	BB	AA	BB	BB	AB	BB	BB	AA	AB	AB	AB	AB	AA
1457	contig_37023	contig_37023_693606	16	36.639	36.639	AB	AB	AA	AB	AB	AA	BB	BB	AB	AB	AA	AB	AB	AB	AB	AB	BB	AB	AA	AB	BB	AA	AB	BB	AB	AA	AB	AA	AB	AB	AA	BB	AA	BB	BB	AB	BB	BB	AA	AB	AB	AB	AB	AA
1458	contig_37023	contig_37023_693642	16	36.639	36.639	AB	AB	AA	AB	AB	AA	BB	BB	AB	AB	AA	AB	AB	AB	AB	AB	BB	AB	AA	AB	BB	AA	AB	BB	AB	AA	AB	AA	AB	AB	AA	BB	AA	BB	BB	AB	BB	BB	AA	AB	AB	AB	AB	AA
1459	contig_37023	contig_37023_693668	16	36.639	36.639	AB	AB	AA	AB	AB	AA	BB	BB	AB	AB	AA	AB	AB	AB	AB	AB	BB	AB	AA	AB	BB	AA	AB	BB	AB	AA	AB	AA	AB	AB	AA	BB	AA	BB	BB	AB	BB	BB	AA	AB	AB	AB	AB	AA
1460	contig_37023	contig_37023_693710	16	36.639	36.639	AB	AB	AA	AB	AB	AA	BB	BB	AB	AB	AA	AB	AB	AB	AB	AB	BB	AB	AA	AB	BB	AA	AB	BB	AB	AA	AB	AA	AB	AB	AA	BB	AA	BB	BB	AB	BB	BB	AA	AB	AB	AB	AB	AA
1461	contig_37023	contig_37023_693720	16	36.639	36.639	AB	AB	AA	AB	AB	AA	BB	BB	AB	AB	AA	AB	AB	AB	AB	AB	BB	AB	AA	AB	BB	AA	AB	BB	AB	AA	AB	AA	AB	AB	AA	BB	AA	BB	BB	AB	BB	BB	AA	AB	AB	AB	AB	AA
1462	contig_37023	contig_37023_693811	16	34.626	34.626	AB	AB	AA	AB	AB	AA	BB	BB	AB	AB	AA	AB	AB	AB	AB	AB	BB	AB	AA	AB	BB	AA	AB	BB	AB	AA	AB	AA	AB	AB	AA	BB	AA	BB	BB	AB	BB	BB	AA	AB	AB	AB	AB	AA
1463	contig_37023	contig_37023_693840	16	36.639	36.639	AB	AB	AA	AB	AB	AA	BB	BB	AB	AB	AA	AB	AB	AB	AB	AB	BB	AB	AA	AB	BB	AA	AB	BB	AB	AA	AB	AA	AB	AB	AA	BB	AA	BB	BB	AB	BB	BB	AA	AB	AB	AB	AB	AA
1464	contig_37023	contig_37023_693859	16	36.639	36.639	AB	AB	AA	AB	AB	AA	BB	BB	AB	AB	AA	AB	AB	AB	AB	AB	BB	AB	AA	AB	BB	AA	AB	BB	AB	AA	AB	AA	AB	AB	AA	BB	AA	BB	BB	AB	BB	BB	AA	AB	AB	AB	AB	AA
1465	contig_37023	contig_37023_693864	16	36.639	36.639	AB	AB	AA	AB	AB	AA	BB	BB	AB	AB	AA	AB	AB	AB	AB	AB	BB	AB	AA	AB	BB	AA	AB	BB	AB	AA	AB	AA	AB	AB	AA	BB	AA	BB	BB	AB	BB	BB	AA	AB	AB	AB	AB	AA
1466	contig_37023	contig_37023_693865	16	36.639	36.639	AB	AB	AA	AB	AB	AA	BB	BB	AB	AB	AA	AB	AB	AB	AB	AB	BB	AB	AA	AB	BB	AA	AB	BB	AB	AA	AB	AA	AB	AB	AA	BB	AA	BB	BB	AB	BB	BB	AA	AB	AB	AB	AB	AA
1467	contig_37023	contig_37023_693890	16	36.639	36.639	AB	AB	AA	AB	AB	AA	BB	BB	AB	AB	AA	AB	AB	AB	AB	AB	BB	AB	AA	AB	BB	AA	AB	BB	AB	AA	AB	AA	AB	AB	AA	BB	AA	BB	BB	AB	BB	BB	AA	AB	AB	AB	AB	AA
1468	contig_37023	contig_37023_693920	16	36.639	36.639	AB	AB	AA	AB	AB	AA	BB	BB	AB	AB	AA	AB	AB	AB	AB	AB	BB	AB	AA	AB	BB	AA	AB	BB	AB	AA	AB	AA	AB	AB	AA	BB	AA	BB	BB	AB	BB	BB	AA	AB	AB	AB	AB	AA
1469	contig_37023	contig_37023_693970	16	34.626	34.626	AB	AB	AA	AB	AB	AA	BB	BB	AB	AB	AA	AB	AB	AB	AB	AB	BB	AB	AA	AB	BB	AA	AB	BB	AB	AA	AB	AA	AB	AB	AA	BB	AA	BB	BB	AB	BB	BB	AA	AB	AB	AB	AB	AA
1470	contig_37023	contig_37023_695767	16	36.639	36.639	AB	AB	AA	AB	AB	AA	BB	BB	AB	AB	AA	AB	AB	AB	AB	AB	BB	AB	AA	AB	BB	AA	AB	BB	AB	AA	AB	AA	AB	AB	AA	BB	AA	BB	BB	AB	BB	BB	AA	AB	AB	AB	AB	AA
1471	contig_37023	contig_37023_696261	16	34.626	34.626	AB	AB	AA	AB	AB	AA	BB	BB	AB	AB	AA	AB	AB	AB	AB	AB	BB	AB	AA	AB	BB	AA	AB	BB	AB	AA	AB	AA	AB	AB	AA	BB	AA	BB	BB	AB	BB	BB	AA	AB	AB	AB	AB	AA
1473	contig_37023	contig_37023_696363	16	36.639	36.639	AB	AB	AA	AB	AB	AA	BB	BB	AB	AB	AA	AB	AB	AB	AB	AB	BB	AB	AA	AB	BB	AA	AB	BB	AB	AA	AB	AA	AB	AB	AA	BB	AA	BB	BB	AB	BB	BB	AA	AB	AB	AB	AB	AA
1474	contig_37023	contig_37023_705731	16	36.639	36.639	AB	AB	AA	AB	AB	AA	BB	BB	AB	AB	AA	AB	AB	AB	AB	AB	BB	AB	AA	AB	BB	AA	AB	BB	AB	AA	AB	AA	AB	AB	AA	BB	AA	BB	BB	AB	BB	BB	AA	AB	AB	AB	AB	AA
1475	contig_37023	contig_37023_705753	16	34.626	34.626	AB	AB	AA	AB	AB	AA	BB	BB	AB	AB	AA	AB	AB	AB	AB	AB	BB	AB	AA	AB	BB	AA	AB	BB	AB	AA	AB	AA	AB	AB	AA	BB	AA	BB	BB	AB	BB	BB	AA	AB	AB	AB	AB	AA
1476	contig_37023	contig_37023_705931	16	34.626	34.626	AB	AB	AA	AB	AB	AA	BB	BB	AB	AB	AA	AB	AB	AB	AB	AB	BB	AB	AA	AB	BB	AA	AB	BB	AB	AA	AB	AA	AB	AB	AA	BB	AA	BB	BB	AB	BB	BB	AA	AB	AB	AB	AB	AA
1477	contig_37023	contig_37023_706130	16	34.626	34.626	AB	AB	AA	AB	AB	AA	BB	BB	AB	AB	AA	AB	AB	AB	AB	AB	BB	AB	AA	AB	BB	AA	AB	BB	AB	AA	AB	AA	AB	AB	AA	BB	AA	BB	BB	AB	BB	BB	AA	AB	AB	AB	AB	AA
1478	contig_37023	contig_37023_708709	16	36.639	36.639	AB	AB	AA	AB	AB	AA	BB	BB	AB	AB	AA	AB	AB	AB	AB	AB	BB	AB	AA	AB	BB	AA	AB	BB	AB	AA	AB	AA	AB	AB	AA	BB	AA	BB	BB	AB	BB	BB	AA	AB	AB	AB	AB	AA
1480	contig_37023	contig_37023_721400	16	34.626	34.626	AB	AB	AA	AB	AB	AA	BB	BB	AB	AB	AA	AB	AB	AB	AB	AB	BB	AB	AA	AB	BB	AA	AB	BB	AB	AA	AB	AA	AB	AB	AA	BB	AA	BB	BB	AB	BB	BB	AA	AB	AB	AB	AB	AA
1481	contig_37023	contig_37023_721490	16	34.626	34.626	AB	AB	AA	AB	AB	AA	BB	BB	AB	AB	AA	AB	AB	AB	AB	AB	BB	AB	AA	AB	BB	AA	AB	BB	AB	AA	AB	AA	AB	AB	AA	BB	AA	BB	BB	AB	BB	BB	AA	AB	AB	AB	AB	AA
1482	contig_37023	contig_37023_721539	16	34.626	34.626	AB	AB	AA	AB	AB	AA	BB	BB	AB	AB	AA	AB	AB	AB	AB	AB	BB	AB	AA	AB	BB	AA	AB	BB	AB	AA	AB	AA	AB	AB	AA	BB	AA	BB	BB	AB	BB	BB	AA	AB	AB	AB	AB	AA
1483	contig_37023	contig_37023_723332	16	36.639	36.639	AB	AB	AA	AB	AB	AA	BB	BB	AB	AB	AA	AB	AB	AB	AB	AB	BB	AB	AA	AB	BB	AA	AB	BB	AB	AA	AB	AA	AB	AB	AA	BB	AA	BB	BB	AB	BB	BB	AA	AB	AB	AB	AB	AA
1484	contig_37023	contig_37023_723367	16	36.639	36.639	AB	AB	AA	AB	AB	AA	BB	BB	AB	AB	AA	AB	AB	AB	AB	AB	BB	AB	AA	AB	BB	AA	AB	BB	AB	AA	AB	AA	AB	AB	AA	BB	AA	BB	BB	AB	BB	BB	AA	AB	AB	AB	AB	AA
1485	contig_37023	contig_37023_723405	16	36.639	36.639	AB	AB	AA	AB	AB	AA	BB	BB	AB	AB	AA	AB	AB	AB	AB	AB	BB	AB	AA	AB	BB	AA	AB	BB	AB	AA	AB	AA	AB	AB	AA	BB	AA	BB	BB	AB	BB	BB	AA	AB	AB	AB	AB	AA
1486	contig_37023	contig_37023_725306	16	35.968	35.968	AB	AB	AA	AB	AB	AA	BB	BB	AB	AB	AA	AB	AB	AB	AB	AB	BB	AB	AA	AB	BB	AA	AB	BB	AB	AA	AB	AA	AB	AB	AA	BB	AA	BB	BB	AB	BB	BB	AA	AB	AB	AB	AB	AA
1487	contig_37023	contig_37023_725613	16	34.626	34.626	AB	AB	AA	AB	AB	AA	BB	BB	AB	AB	AA	AB	AB	AB	AB	AB	BB	AB	AA	AB	BB	AA	AB	BB	AB	AA	AB	AA	AB	AB	AA	BB	AA	BB	BB	AB	BB	BB	AA	AB	AB	AB	AB	AA
1488	contig_37023	contig_37023_726320	16	36.639	36.639	AB	AB	AA	AB	AB	AA	BB	BB	AB	AB	AA	AB	AB	AB	AB	AB	BB	AB	AA	AB	BB	AA	AB	BB	AB	AA	AB	AA	AB	AB	AA	BB	AA	BB	BB	AB	BB	BB	AA	AB	AB	AB	AB	AA
1489	contig_37023	contig_37023_726358	16	36.639	36.639	AB	AB	AA	AB	AB	AA	BB	BB	AB	AB	AA	AB	AB	AB	AB	AB	BB	AB	AA	AB	BB	AA	AB	BB	AB	AA	AB	AA	AB	AB	AA	BB	AA	BB	BB	AB	BB	BB	AA	AB	AB	AB	AB	AA
1490	contig_37023	contig_37023_726484	16	36.639	36.639	AB	AB	AA	AB	AB	AA	BB	BB	AB	AB	AA	AB	AB	AB	AB	AB	BB	AB	AA	AB	BB	AA	AB	BB	AB	AA	AB	AA	AB	AB	AA	BB	AA	BB	BB	AB	BB	BB	AA	AB	AB	AB	AB	AA
1491	contig_37023	contig_37023_726835	16	34.626	34.626	AB	AB	AA	AB	AB	AA	BB	BB	AB	AB	AA	AB	AB	AB	AB	AB	BB	AB	AA	AB	BB	AA	AB	BB	AB	AA	AB	AA	AB	AB	AA	BB	AA	BB	BB	AB	BB	BB	AA	AB	AB	AB	AB	AA
1496	contig_37023	contig_37023_727846	16	36.639	36.639	AB	AB	AA	AB	AB	AA	BB	BB	AB	AB	AA	AB	AB	AB	AB	AB	BB	AB	AA	AB	BB	AA	AB	BB	AB	AA	AB	AA	AB	AB	AA	BB	AA	BB	BB	AB	BB	BB	AA	AB	AB	AB	AB	AA
1497	contig_37023	contig_37023_728160	16	34.626	34.626	AB	AB	AA	AB	AB	AA	BB	BB	AB	AB	AA	AB	AB	AB	AB	AB	BB	AB	AA	AB	BB	AA	AB	BB	AB	AA	AB	AA	AB	AB	AA	BB	AA	BB	BB	AB	BB	BB	AA	AB	AB	AB	AB	AA
1498	contig_37023	contig_37023_728550	16	36.639	36.639	AB	AB	AA	AB	AB	AA	BB	BB	AB	AB	AA	AB	AB	AB	AB	AB	BB	AB	AA	AB	BB	AA	AB	BB	AB	AA	AB	AA	AB	AB	AA	BB	AA	BB	BB	AB	BB	BB	AA	AB	AB	AB	AB	AA
1499	contig_37023	contig_37023_729779	16	34.626	34.626	AB	AB	AA	AB	AB	AA	BB	BB	AB	AB	AA	AB	AB	AB	AB	AB	BB	AB	AA	AB	BB	AA	AB	BB	AB	AA	AB	AA	AB	AB	AA	BB	AA	BB	BB	AB	BB	BB	AA	AB	AB	AB	AB	AA
1500	contig_37023	contig_37023_730419	16	34.626	34.626	AB	AB	AA	AB	AB	AA	BB	BB	AB	AB	AA	AB	AB	AB	AB	AB	BB	AB	AA	AB	BB	AA	AB	BB	AB	AA	AB	AA	AB	AB	AA	BB	AA	BB	BB	AB	BB	BB	AA	AB	AB	AB	AB	AA
1501	contig_37023	contig_37023_731296	16	36.639	36.639	AB	AB	AA	AB	AB	AA	BB	BB	AB	AB	AA	AB	AB	AB	AB	AB	BB	AB	AA	AB	BB	AA	AB	BB	AB	AA	AB	AA	AB	AB	AA	BB	AA	BB	BB	AB	BB	BB	AA	AB	AB	AB	AB	AA
1502	contig_37023	contig_37023_736292	16	34.626	34.626	AB	AB	AA	AB	AB	AA	BB	BB	AB	AB	AA	AB	AB	AB	AB	AB	BB	AB	AA	AB	BB	AA	AB	BB	AB	AA	AB	AA	AB	AB	AA	BB	AA	BB	BB	AB	BB	BB	AA	AB	AB	AB	AB	AA
1503	contig_37023	contig_37023_751820	16	34.626	34.626	AB	AB	AA	AB	AB	AA	BB	BB	AB	AB	AA	AB	AB	AB	AB	AB	BB	AB	AA	AB	BB	AA	AB	BB	AB	AA	AB	AA	AB	AB	AA	BB	AA	BB	BB	AB	BB	BB	AA	AB	AB	AB	AB	AA
1504	contig_37023	contig_37023_751856	16	34.626	34.626	AB	AB	AA	AB	AB	AA	BB	BB	AB	AB	AA	AB	AB	AB	AB	AB	BB	AB	AA	AB	BB	AA	AB	BB	AB	AA	AB	AA	AB	AB	AA	BB	AA	BB	BB	AB	BB	BB	AA	AB	AB	AB	AB	AA
1505	contig_37023	contig_37023_751939	16	34.626	34.626	AB	AB	AA	AB	AB	AA	BB	BB	AB	AB	AA	AB	AB	AB	AB	AB	BB	AB	AA	AB	BB	AA	AB	BB	AB	AA	AB	AA	AB	AB	AA	BB	AA	BB	BB	AB	BB	BB	AA	AB	AB	AB	AB	AA
1506	contig_37023	contig_37023_752543	16	34.626	34.626	AB	AB	AA	AB	AB	AA	BB	BB	AB	AB	AA	AB	AB	AB	AB	AB	BB	AB	AA	AB	BB	AA	AB	BB	AB	AA	AB	AA	AB	AB	AA	BB	AA	BB	BB	AB	BB	BB	AA	AB	AB	AB	AB	AA
1507	contig_37023	contig_37023_752556	16	34.626	34.626	AB	AB	AA	AB	AB	AA	BB	BB	AB	AB	AA	AB	AB	AB	AB	AB	BB	AB	AA	AB	BB	AA	AB	BB	AB	AA	AB	AA	AB	AB	AA	BB	AA	BB	BB	AB	BB	BB	AA	AB	AB	AB	AB	AA
1508	contig_37023	contig_37023_752782	16	36.639	36.639	AB	AB	AA	AB	AB	AA	BB	BB	AB	AB	AA	AB	AB	AB	AB	AB	BB	AB	AA	AB	BB	AA	AB	BB	AB	AA	AB	AA	AB	AB	AA	BB	AA	BB	BB	AB	BB	BB	AA	AB	AB	AB	AB	AA
1509	contig_37023	contig_37023_756836	16	34.626	34.626	AB	AB	AA	AB	AB	AA	BB	BB	AB	AB	AA	AB	AB	AB	AB	AB	BB	AB	AA	AB	BB	AA	AB	BB	AB	AA	AB	AA	AB	AB	AA	BB	AA	BB	BB	AB	BB	BB	AA	AB	AB	AB	AB	AA
1510	contig_37023	contig_37023_756838	16	34.626	34.626	AB	AB	AA	AB	AB	AA	BB	BB	AB	AB	AA	AB	AB	AB	AB	AB	BB	AB	AA	AB	BB	AA	AB	BB	AB	AA	AB	AA	AB	AB	AA	BB	AA	BB	BB	AB	BB	BB	AA	AB	AB	AB	AB	AA
1511	contig_37023	contig_37023_756872	16	36.639	36.639	AB	AB	AA	AB	AB	AA	BB	BB	AB	AB	AA	AB	AB	AB	AB	AB	BB	AB	AA	AB	BB	AA	AB	BB	AB	AA	AB	AA	AB	AB	AA	BB	AA	BB	BB	AB	BB	BB	AA	AB	AB	AB	AB	AA
1512	contig_37023	contig_37023_758533	16	36.639	36.639	AB	AB	AA	AB	AB	AA	BB	BB	AB	AB	AA	AB	AB	AB	AB	AB	BB	AB	AA	AB	BB	AA	AB	BB	AB	AA	AB	AA	AB	AB	AA	BB	AA	BB	BB	AB	BB	BB	AA	AB	AB	AB	AB	AA
1513	contig_37023	contig_37023_759986	16	34.626	34.626	AB	AB	AA	AB	AB	AA	BB	BB	AB	AB	AA	AB	AB	AB	AB	AB	BB	AB	AA	AB	BB	AA	AB	BB	AB	AA	AB	AA	AB	AB	AA	BB	AA	BB	BB	AB	BB	BB	AA	AB	AB	AB	AB	AA
1514	contig_37023	contig_37023_760921	16	34.626	34.626	AB	AB	AA	AB	AB	AA	BB	BB	AB	AB	AA	AB	AB	AB	AB	AB	BB	AB	AA	AB	BB	AA	AB	BB	AB	AA	AB	AA	AB	AB	AA	BB	AA	BB	BB	AB	BB	BB	AA	AB	AB	AB	AB	AA
1515	contig_37023	contig_37023_762156	16	34.626	34.626	AB	AB	AA	AB	AB	AA	BB	BB	AB	AB	AA	AB	AB	AB	AB	AB	BB	AB	AA	AB	BB	AA	AB	BB	AB	AA	AB	AA	AB	AB	AA	BB	AA	BB	BB	AB	BB	BB	AA	AB	AB	AB	AB	AA
1516	contig_37023	contig_37023_762686	16	34.626	34.626	AB	AB	AA	AB	AB	AA	BB	BB	AB	AB	AA	AB	AB	AB	AB	AB	BB	AB	AA	AB	BB	AA	AB	BB	AB	AA	AB	AA	AB	AB	AA	BB	AA	BB	BB	AB	BB	BB	AA	AB	AB	AB	AB	AA
1517	contig_37023	contig_37023_764673	16	34.626	34.626	AB	AB	AA	AB	AB	AA	BB	BB	AB	AB	AA	AB	AB	AB	AB	AB	BB	AB	AA	AB	BB	AA	AB	BB	AB	AA	AB	AA	AB	AB	AA	BB	AA	BB	BB	AB	BB	BB	AA	AB	AB	AB	AB	AA
1518	contig_37023	contig_37023_776378	16	34.626	34.626	AB	AB	AA	AB	AB	AA	BB	BB	AB	AB	AA	AB	AB	AB	AB	AB	BB	AB	AA	AB	BB	AA	AB	BB	AB	AA	AB	AA	AB	AB	AA	BB	AA	BB	BB	AB	BB	BB	AA	AB	AB	AB	AB	AA
1519	contig_37023	contig_37023_778308	16	34.626	34.626	AB	AB	AA	AB	AB	AA	BB	BB	AB	AB	AA	AB	AB	AB	AB	AB	BB	AB	AA	AB	BB	AA	AB	BB	AB	AA	AB	AA	AB	AB	AA	BB	AA	BB	BB	AB	BB	BB	AA	AB	AB	AB	AB	AA
1520	contig_37023	contig_37023_779744	16	34.626	34.626	AB	AB	AA	AB	AB	AA	BB	BB	AB	AB	AA	AB	AB	AB	AB	AB	BB	AB	AA	AB	BB	AA	AB	BB	AB	AA	AB	AA	AB	AB	AA	BB	AA	BB	BB	AB	BB	BB	AA	AB	AB	AB	AB	AA
1521	contig_37023	contig_37023_784078	16	34.626	34.626	AB	AB	AA	AB	AB	AA	BB	BB	AB	AB	AA	AB	AB	AB	AB	AB	BB	AB	AA	AB	BB	AA	AB	BB	AB	AA	AB	AA	AB	AB	AA	BB	AA	BB	BB	AB	BB	BB	AA	AB	AB	AB	AB	AA
1522	contig_37023	contig_37023_784476	16	34.626	34.626	AB	AB	AA	AB	AB	AA	BB	BB	AB	AB	AA	AB	AB	AB	AB	AB	BB	AB	AA	AB	BB	AA	AB	BB	AB	AA	AB	AA	AB	AB	AA	BB	AA	BB	BB	AB	BB	BB	AA	AB	AB	AB	AB	AA
1523	contig_37023	contig_37023_784661	16	34.626	34.626	AB	AB	AA	AB	AB	AA	BB	BB	AB	AB	AA	AB	AB	AB	AB	AB	BB	AB	AA	AB	BB	AA	AB	BB	AB	AA	AB	AA	AB	AB	AA	BB	AA	BB	BB	AB	BB	BB	AA	AB	AB	AB	AB	AA
1524	contig_37023	contig_37023_788592	16	34.626	34.626	AB	AB	AA	AB	AB	AA	BB	BB	AB	AB	AA	AB	AB	AB	AB	AB	BB	AB	AA	AB	BB	AA	AB	BB	AB	AA	AB	AA	AB	AB	AA	BB	AA	BB	BB	AB	BB	BB	AA	AB	AB	AB	AB	AA
1525	contig_37023	contig_37023_790834	16	34.626	34.626	AB	AB	AA	AB	AB	AA	BB	BB	AB	AB	AA	AB	AB	AB	AB	AB	BB	AB	AA	AB	BB	AA	AB	BB	AB	AA	AB	AA	AB	AB	AA	BB	AA	BB	BB	AB	BB	BB	AA	AB	AB	AB	AB	AA
1526	contig_37023	contig_37023_800941	16	34.626	34.626	AB	AB	AA	AB	AB	AA	BB	BB	AB	AB	AA	AB	AB	AB	AB	AB	BB	AB	AA	AB	BB	AA	AB	BB	AB	AA	AB	AA	AB	AB	AA	BB	AA	BB	BB	AB	BB	BB	AA	AB	AB	AB	AB	AA
1527	contig_37023	contig_37023_801708	16	34.626	34.626	AB	AB	AA	AB	AB	AA	BB	BB	AB	AB	AA	AB	AB	AB	AB	AB	BB	AB	AA	AB	BB	AA	AB	BB	AB	AA	AB	AA	AB	AB	AA	BB	AA	BB	BB	AB	BB	BB	AA	AB	AB	AB	AB	AA
1529	contig_37023	contig_37023_804560	16	34.626	34.626	AB	AB	AA	AB	AB	AA	BB	BB	AB	AB	AA	AB	AB	AB	AB	AB	BB	AB	AA	AB	BB	AA	AB	BB	AB	AA	AB	AA	AB	AB	AA	BB	AA	BB	BB	AB	BB	BB	AA	AB	AB	AB	AB	AA
1530	contig_37023	contig_37023_814504	16	34.626	34.626	AB	AB	AA	AB	AB	AA	BB	BB	AB	AB	AA	AB	AB	AB	AB	AB	BB	AB	AA	AB	BB	AA	AB	BB	AB	AA	AB	AA	AB	AB	AA	BB	AA	BB	BB	AB	BB	BB	AA	AB	AB	AB	AB	AA
1531	contig_37023	contig_37023_823940	16	34.626	34.626	AB	AB	AA	AB	AB	AA	BB	BB	AB	AB	AA	AB	AB	AB	AB	AB	BB	AB	AA	AB	BB	AA	AB	BB	AB	AA	AB	AA	AB	AB	AA	BB	AA	BB	BB	AB	BB	BB	AA	AB	AB	AB	AB	AA
1532	contig_37023	contig_37023_826812	16	34.626	34.626	AB	AB	AA	AB	AB	AA	BB	BB	AB	AB	AA	AB	AB	AB	AB	AB	BB	AB	AA	AB	BB	AA	AB	BB	AB	AA	AB	AA	AB	AB	AA	BB	AA	BB	BB	AB	BB	BB	AA	AB	AB	AB	AB	AA
1535	contig_37023	contig_37023_842957	16	34.626	34.626	AB	AB	AA	AB	AB	AA	BB	BB	AB	AB	AA	AB	AB	AB	AB	AB	BB	AB	AA	AB	BB	AA	AB	BB	AB	AA	AB	AA	AB	AB	AA	BB	AA	BB	BB	AB	BB	BB	AA	AB	AB	AB	AB	AA
1536	contig_37023	contig_37023_842971	16	34.626	34.626	AB	AB	AA	AB	AB	AA	BB	BB	AB	AB	AA	AB	AB	AB	AB	AB	BB	AB	AA	AB	BB	AA	AB	BB	AB	AA	AB	AA	AB	AB	AA	BB	AA	BB	BB	AB	BB	BB	AA	AB	AB	AB	AB	AA
1537	contig_37023	contig_37023_847077	16	36.639	36.639	AB	AB	AA	AB	AB	AA	BB	BB	AB	AB	AA	AB	AB	AB	AB	AB	BB	AB	AA	AB	BB	AA	AB	BB	AB	AA	AB	AA	AB	AB	AA	BB	AA	BB	BB	AB	BB	BB	AA	AB	AB	AB	AB	AA
1538	contig_37023	contig_37023_847247	16	34.626	34.626	AB	AB	AA	AB	AB	AA	BB	BB	AB	AB	AA	AB	AB	AB	AB	AB	BB	AB	AA	AB	BB	AA	AB	BB	AB	AA	AB	AA	AB	AB	AA	BB	AA	BB	BB	AB	BB	BB	AA	AB	AB	AB	AB	AA
1539	contig_37023	contig_37023_868811	16	34.626	34.626	AB	AB	AA	AB	AB	AA	BB	BB	AB	AB	AA	AB	AB	AB	AB	AB	BB	AB	AA	AB	BB	AA	AB	BB	AB	AA	AB	AA	AB	AB	AA	BB	AA	BB	BB	AB	BB	BB	AA	AB	AB	AB	AB	AA
1540	contig_37023	contig_37023_875399	16	34.626	34.626	AB	AB	AA	AB	AB	AA	BB	BB	AB	AB	AA	AB	AB	AB	AB	AB	BB	AB	AA	AB	BB	AA	AB	BB	AB	AA	AB	AA	AB	AB	AA	BB	AA	BB	BB	AB	BB	BB	AA	AB	AB	AB	AB	AA
1541	contig_37023	contig_37023_881638	16	34.626	34.626	AB	AB	AA	AB	AB	AA	BB	BB	AB	AB	AA	AB	AB	AB	AB	AB	BB	AB	AA	AB	BB	AA	AB	BB	AB	AA	AB	AA	AB	AB	AA	BB	AA	BB	BB	AB	BB	BB	AA	AB	AB	AB	AB	AA
1542	contig_37023	contig_37023_881659	16	34.626	34.626	AB	AB	AA	AB	AB	AA	BB	BB	AB	AB	AA	AB	AB	AB	AB	AB	BB	AB	AA	AB	BB	AA	AB	BB	AB	AA	AB	AA	AB	AB	AA	BB	AA	BB	BB	AB	BB	BB	AA	AB	AB	AB	AB	AA
1543	contig_37023	contig_37023_881665	16	34.626	34.626	AB	AB	AA	AB	AB	AA	BB	BB	AB	AB	AA	AB	AB	AB	AB	AB	BB	AB	AA	AB	BB	AA	AB	BB	AB	AA	AB	AA	AB	AB	AA	BB	AA	BB	BB	AB	BB	BB	AA	AB	AB	AB	AB	AA
1544	contig_37023	contig_37023_882184	16	36.639	36.639	AB	AB	AA	AB	AB	AA	BB	BB	AB	AB	AA	AB	AB	AB	AB	AB	BB	AB	AA	AB	BB	AA	AB	BB	AB	AA	AB	AA	AB	AB	AA	BB	AA	BB	BB	AB	BB	BB	AA	AB	AB	AB	AB	AA
1545	contig_37023	contig_37023_882185	16	36.639	36.639	AB	AB	AA	AB	AB	AA	BB	BB	AB	AB	AA	AB	AB	AB	AB	AB	BB	AB	AA	AB	BB	AA	AB	BB	AB	AA	AB	AA	AB	AB	AA	BB	AA	BB	BB	AB	BB	BB	AA	AB	AB	AB	AB	AA
1546	contig_37023	contig_37023_882266	16	34.626	34.626	AB	AB	AA	AB	AB	AA	BB	BB	AB	AB	AA	AB	AB	AB	AB	AB	BB	AB	AA	AB	BB	AA	AB	BB	AB	AA	AB	AA	AB	AB	AA	BB	AA	BB	BB	AB	BB	BB	AA	AB	AB	AB	AB	AA
1547	contig_37023	contig_37023_882267	16	34.626	34.626	AB	AB	AA	AB	AB	AA	BB	BB	AB	AB	AA	AB	AB	AB	AB	AB	BB	AB	AA	AB	BB	AA	AB	BB	AB	AA	AB	AA	AB	AB	AA	BB	AA	BB	BB	AB	BB	BB	AA	AB	AB	AB	AB	AA
1548	contig_37023	contig_37023_882269	16	34.626	34.626	AB	AB	AA	AB	AB	AA	BB	BB	AB	AB	AA	AB	AB	AB	AB	AB	BB	AB	AA	AB	BB	AA	AB	BB	AB	AA	AB	AA	AB	AB	AA	BB	AA	BB	BB	AB	BB	BB	AA	AB	AB	AB	AB	AA
1549	contig_37023	contig_37023_887918	16	34.626	34.626	AB	AB	AA	AB	AB	AA	BB	BB	AB	AB	AA	AB	AB	AB	AB	AB	BB	AB	AA	AB	BB	AA	AB	BB	AB	AA	AB	AA	AB	AB	AA	BB	AA	BB	BB	AB	BB	BB	AA	AB	AB	AB	AB	AA
1550	contig_37023	contig_37023_899413	16	34.626	34.626	AB	AB	AA	AB	AB	AA	BB	BB	AB	AB	AA	AB	AB	AB	AB	AB	BB	AB	AA	AB	BB	AA	AB	BB	AB	AA	AB	AA	AB	AB	AA	BB	AA	BB	BB	AB	BB	BB	AA	AB	AB	AB	AB	AA
1551	contig_37023	contig_37023_899736	16	34.626	34.626	AB	AB	AA	AB	AB	AA	BB	BB	AB	AB	AA	AB	AB	AB	AB	AB	BB	AB	AA	AB	BB	AA	AB	BB	AB	AA	AB	AA	AB	AB	AA	BB	AA	BB	BB	AB	BB	BB	AA	AB	AB	AB	AB	AA
1552	contig_37023	contig_37023_903865	16	36.639	36.639	AB	AB	AA	AB	AB	AA	BB	BB	AB	AB	AA	AB	AB	AB	AB	AB	BB	AB	AA	AB	BB	AA	AB	BB	AB	AA	AB	AA	AB	AB	AA	BB	AA	BB	BB	AB	BB	BB	AA	AB	AB	AB	AB	AA
1553	contig_37023	contig_37023_903901	16	34.626	34.626	AB	AB	AA	AB	AB	AA	BB	BB	AB	AB	AA	AB	AB	AB	AB	AB	BB	AB	AA	AB	BB	AA	AB	BB	AB	AA	AB	AA	AB	AB	AA	BB	AA	BB	BB	AB	BB	BB	AA	AB	AB	AB	AB	AA
1554	contig_37023	contig_37023_903902	16	34.626	34.626	AB	AB	AA	AB	AB	AA	BB	BB	AB	AB	AA	AB	AB	AB	AB	AB	BB	AB	AA	AB	BB	AA	AB	BB	AB	AA	AB	AA	AB	AB	AA	BB	AA	BB	BB	AB	BB	BB	AA	AB	AB	AB	AB	AA
1555	contig_37023	contig_37023_917760	16	36.639	36.639	AB	AB	AA	AB	AB	AA	BB	BB	AB	AB	AA	AB	AB	AB	AB	AB	BB	AB	AA	AB	BB	AA	AB	BB	AB	AA	AB	AA	AB	AB	AA	BB	AA	BB	BB	AB	BB	BB	AA	AB	AB	AB	AB	AA
1556	contig_37023	contig_37023_917796	16	36.639	36.639	AB	AB	AA	AB	AB	AA	BB	BB	AB	AB	AA	AB	AB	AB	AB	AB	BB	AB	AA	AB	BB	AA	AB	BB	AB	AA	AB	AA	AB	AB	AA	BB	AA	BB	BB	AB	BB	BB	AA	AB	AB	AB	AB	AA
1557	contig_37023	contig_37023_917975	16	36.639	36.639	AB	AB	AA	AB	AB	AA	BB	BB	AB	AB	AA	AB	AB	AB	AB	AB	BB	AB	AA	AB	BB	AA	AB	BB	AB	AA	AB	AA	AB	AB	AA	BB	AA	BB	BB	AB	BB	BB	AA	AB	AB	AB	AB	AA
1558	contig_37023	contig_37023_917976	16	34.626	34.626	AB	AB	AA	AB	AB	AA	BB	BB	AB	AB	AA	AB	AB	AB	AB	AB	BB	AB	AA	AB	BB	AA	AB	BB	AB	AA	AB	AA	AB	AB	AA	BB	AA	BB	BB	AB	BB	BB	AA	AB	AB	AB	AB	AA
1559	contig_37023	contig_37023_923088	16	36.639	36.639	AB	AB	AA	AB	AB	AA	BB	BB	AB	AB	AA	AB	AB	AB	AB	AB	BB	AB	AA	AB	BB	AA	AB	BB	AB	AA	AB	AA	AB	AB	AA	BB	AA	BB	BB	AB	BB	BB	AA	AB	AB	AB	AB	AA
1560	contig_37023	contig_37023_923160	16	34.626	34.626	AB	AB	AA	AB	AB	AA	BB	BB	AB	AB	AA	AB	AB	AB	AB	AB	BB	AB	AA	AB	BB	AA	AB	BB	AB	AA	AB	AA	AB	AB	AA	BB	AA	BB	BB	AB	BB	BB	AA	AB	AB	AB	AB	AA
1561	contig_37023	contig_37023_926291	16	34.626	34.626	AB	AB	AA	AB	AB	AA	BB	BB	AB	AB	AA	AB	AB	AB	AB	AB	BB	AB	AA	AB	BB	AA	AB	BB	AB	AA	AB	AA	AB	AB	AA	BB	AA	BB	BB	AB	BB	BB	AA	AB	AB	AB	AB	AA
1562	contig_37023	contig_37023_927102	16	34.626	34.626	AB	AB	AA	AB	AB	AA	BB	BB	AB	AB	AA	AB	AB	AB	AB	AB	BB	AB	AA	AB	BB	AA	AB	BB	AB	AA	AB	AA	AB	AB	AA	BB	AA	BB	BB	AB	BB	BB	AA	AB	AB	AB	AB	AA
1563	contig_37023	contig_37023_927899	16	34.626	34.626	AB	AB	AA	AB	AB	AA	BB	BB	AB	AB	AA	AB	AB	AB	AB	AB	BB	AB	AA	AB	BB	AA	AB	BB	AB	AA	AB	AA	AB	AB	AA	BB	AA	BB	BB	AB	BB	BB	AA	AB	AB	AB	AB	AA
1564	contig_37023	contig_37023_928399	16	34.626	34.626	AB	AB	AA	AB	AB	AA	BB	BB	AB	AB	AA	AB	AB	AB	AB	AB	BB	AB	AA	AB	BB	AA	AB	BB	AB	AA	AB	AA	AB	AB	AA	BB	AA	BB	BB	AB	BB	BB	AA	AB	AB	AB	AB	AA
1565	contig_37023	contig_37023_929442	16	34.626	34.626	AB	AB	AA	AB	AB	AA	BB	BB	AB	AB	AA	AB	AB	AB	AB	AB	BB	AB	AA	AB	BB	AA	AB	BB	AB	AA	AB	AA	AB	AB	AA	BB	AA	BB	BB	AB	BB	BB	AA	AB	AB	AB	AB	AA
1566	contig_37023	contig_37023_929481	16	34.626	34.626	AB	AB	AA	AB	AB	AA	BB	BB	AB	AB	AA	AB	AB	AB	AB	AB	BB	AB	AA	AB	BB	AA	AB	BB	AB	AA	AB	AA	AB	AB	AA	BB	AA	BB	BB	AB	BB	BB	AA	AB	AB	AB	AB	AA
1567	contig_37023	contig_37023_930499	16	34.626	34.626	AB	AB	AA	AB	AB	AA	BB	BB	AB	AB	AA	AB	AB	AB	AB	AB	BB	AB	AA	AB	BB	AA	AB	BB	AB	AA	AB	AA	AB	AB	AA	BB	AA	BB	BB	AB	BB	BB	AA	AB	AB	AB	AB	AA
1568	contig_37023	contig_37023_934878	16	34.626	34.626	AB	AB	AA	AB	AB	AA	BB	BB	AB	AB	AA	AB	AB	AB	AB	AB	BB	AB	AA	AB	BB	AA	AB	BB	AB	AA	AB	AA	AB	AB	AA	BB	AA	BB	BB	AB	BB	BB	AA	AB	AB	AB	AB	AA
1570	contig_37023	contig_37023_943368	16	34.626	34.626	AB	AB	AA	AB	AB	AA	BB	BB	AB	AB	AA	AB	AB	AB	AB	AB	BB	AB	AA	AB	BB	AA	AB	BB	AB	AA	AB	AA	AB	AB	AA	BB	AA	BB	BB	AB	BB	BB	AA	AB	AB	AB	AB	AA
1571	contig_37023	contig_37023_968115	16	36.639	36.639	AB	AB	AA	AB	AB	AA	BB	BB	AB	AB	AA	AB	AB	AB	AB	AB	BB	AB	AA	AB	BB	AA	AB	BB	AB	AA	AB	AA	AB	AB	AA	BB	AA	BB	BB	AB	BB	BB	AA	AB	AB	AB	AB	AA
1572	contig_37023	contig_37023_968204	16	34.626	34.626	AB	AB	AA	AB	AB	AA	BB	BB	AB	AB	AA	AB	AB	AB	AB	AB	BB	AB	AA	AB	BB	AA	AB	BB	AB	AA	AB	AA	AB	AB	AA	BB	AA	BB	BB	AB	BB	BB	AA	AB	AB	AB	AB	AA
1573	contig_37023	contig_37023_968751	16	34.626	34.626	AB	AB	AA	AB	AB	AA	BB	BB	AB	AB	AA	AB	AB	AB	AB	AB	BB	AB	AA	AB	BB	AA	AB	BB	AB	AA	AB	AA	AB	AB	AA	BB	AA	BB	BB	AB	BB	BB	AA	AB	AB	AB	AB	AA
1574	contig_37023	contig_37023_968772	16	34.626	34.626	AB	AB	AA	AB	AB	AA	BB	BB	AB	AB	AA	AB	AB	AB	AB	AB	BB	AB	AA	AB	BB	AA	AB	BB	AB	AA	AB	AA	AB	AB	AA	BB	AA	BB	BB	AB	BB	BB	AA	AB	AB	AB	AB	AA
1575	contig_37023	contig_37023_968921	16	34.626	34.626	AB	AB	AA	AB	AB	AA	BB	BB	AB	AB	AA	AB	AB	AB	AB	AB	BB	AB	AA	AB	BB	AA	AB	BB	AB	AA	AB	AA	AB	AB	AA	BB	AA	BB	BB	AB	BB	BB	AA	AB	AB	AB	AB	AA
1576	contig_37023	contig_37023_969918	16	34.626	34.626	AB	AB	AA	AB	AB	AA	BB	BB	AB	AB	AA	AB	AB	AB	AB	AB	BB	AB	AA	AB	BB	AA	AB	BB	AB	AA	AB	AA	AB	AB	AA	BB	AA	BB	BB	AB	BB	BB	AA	AB	AB	AB	AB	AA
1577	contig_37023	contig_37023_976016	16	34.626	34.626	AB	AB	AA	AB	AB	AA	BB	BB	AB	AB	AA	AB	AB	AB	AB	AB	BB	AB	AA	AB	BB	AA	AB	BB	AB	AA	AB	AA	AB	AB	AA	BB	AA	BB	BB	AB	BB	BB	AA	AB	AB	AB	AB	AA
1579	contig_37023	contig_37023_984683	16	34.626	34.626	AB	AB	AA	AB	AB	AA	BB	BB	AB	AB	AA	AB	AB	AB	AB	AB	BB	AB	AA	AB	BB	AA	AB	BB	AB	AA	AB	AA	AB	AB	AA	BB	AA	BB	BB	AB	BB	BB	AA	AB	AB	AB	AB	AA
1580	contig_37023	contig_37023_985762	16	34.626	34.626	AB	AB	AA	AB	AB	AA	BB	BB	AB	AB	AA	AB	AB	AB	AB	AB	BB	AB	AA	AB	BB	AA	AB	BB	AB	AA	AB	AA	AB	AB	AA	BB	AA	BB	BB	AB	BB	BB	AA	AB	AB	AB	AB	AA
1581	contig_37023	contig_37023_986043	16	34.626	34.626	AB	AB	AA	AB	AB	AA	BB	BB	AB	AB	AA	AB	AB	AB	AB	AB	BB	AB	AA	AB	BB	AA	AB	BB	AB	AA	AB	AA	AB	AB	AA	BB	AA	BB	BB	AB	BB	BB	AA	AB	AB	AB	AB	AA
1582	contig_37023	contig_37023_986111	16	34.626	34.626	AB	AB	AA	AB	AB	AA	BB	BB	AB	AB	AA	AB	AB	AB	AB	AB	BB	AB	AA	AB	BB	AA	AB	BB	AB	AA	AB	AA	AB	AB	AA	BB	AA	BB	BB	AB	BB	BB	AA	AB	AB	AB	AB	AA
1583	contig_37023	contig_37023_986265	16	34.626	34.626	AB	AB	AA	AB	AB	AA	BB	BB	AB	AB	AA	AB	AB	AB	AB	AB	BB	AB	AA	AB	BB	AA	AB	BB	AB	AA	AB	AA	AB	AB	AA	BB	AA	BB	BB	AB	BB	BB	AA	AB	AB	AB	AB	AA
1584	contig_37023	contig_37023_986270	16	36.639	36.639	AB	AB	AA	AB	AB	AA	BB	BB	AB	AB	AA	AB	AB	AB	AB	AB	BB	AB	AA	AB	BB	AA	AB	BB	AB	AA	AB	AA	AB	AB	AA	BB	AA	BB	BB	AB	BB	BB	AA	AB	AB	AB	AB	AA
1585	contig_37023	contig_37023_986298	16	34.626	34.626	AB	AB	AA	AB	AB	AA	BB	BB	AB	AB	AA	AB	AB	AB	AB	AB	BB	AB	AA	AB	BB	AA	AB	BB	AB	AA	AB	AA	AB	AB	AA	BB	AA	BB	BB	AB	BB	BB	AA	AB	AB	AB	AB	AA
1586	contig_37023	contig_37023_986324	16	34.626	34.626	AB	AB	AA	AB	AB	AA	BB	BB	AB	AB	AA	AB	AB	AB	AB	AB	BB	AB	AA	AB	BB	AA	AB	BB	AB	AA	AB	AA	AB	AB	AA	BB	AA	BB	BB	AB	BB	BB	AA	AB	AB	AB	AB	AA
1587	contig_37023	contig_37023_986334	16	34.626	34.626	AB	AB	AA	AB	AB	AA	BB	BB	AB	AB	AA	AB	AB	AB	AB	AB	BB	AB	AA	AB	BB	AA	AB	BB	AB	AA	AB	AA	AB	AB	AA	BB	AA	BB	BB	AB	BB	BB	AA	AB	AB	AB	AB	AA
1588	contig_37023	contig_37023_986344	16	34.626	34.626	AB	AB	AA	AB	AB	AA	BB	BB	AB	AB	AA	AB	AB	AB	AB	AB	BB	AB	AA	AB	BB	AA	AB	BB	AB	AA	AB	AA	AB	AB	AA	BB	AA	BB	BB	AB	BB	BB	AA	AB	AB	AB	AB	AA
1589	contig_37023	contig_37023_986397	16	34.626	34.626	AB	AB	AA	AB	AB	AA	BB	BB	AB	AB	AA	AB	AB	AB	AB	AB	BB	AB	AA	AB	BB	AA	AB	BB	AB	AA	AB	AA	AB	AB	AA	BB	AA	BB	BB	AB	BB	BB	AA	AB	AB	AB	AB	AA
1590	contig_37023	contig_37023_988847	16	34.626	34.626	AB	AB	AA	AB	AB	AA	BB	BB	AB	AB	AA	AB	AB	AB	AB	AB	BB	AB	AA	AB	BB	AA	AB	BB	AB	AA	AB	AA	AB	AB	AA	BB	AA	BB	BB	AB	BB	BB	AA	AB	AB	AB	AB	AA
1591	contig_37023	contig_37023_988963	16	34.626	34.626	AB	AB	AA	AB	AB	AA	BB	BB	AB	AB	AA	AB	AB	AB	AB	AB	BB	AB	AA	AB	BB	AA	AB	BB	AB	AA	AB	AA	AB	AB	AA	BB	AA	BB	BB	AB	BB	BB	AA	AB	AB	AB	AB	AA
1593	contig_37023	contig_37023_990617	16	36.639	36.639	AB	AB	AA	AB	AB	AA	BB	BB	AB	AB	AA	AB	AB	AB	AB	AB	BB	AB	AA	AB	BB	AA	AB	BB	AB	AA	AB	AA	AB	AB	AA	BB	AA	BB	BB	AB	BB	BB	AA	AB	AB	AB	AB	AA
1594	contig_37023	contig_37023_994455	16	36.639	36.639	AB	AB	AA	AB	AB	AA	BB	BB	AB	AB	AA	AB	AB	AB	AB	AB	BB	AB	AA	AB	BB	AA	AB	BB	AB	AA	AB	AA	AB	AB	AA	BB	AA	BB	BB	AB	BB	BB	AA	AB	AB	AB	AB	AA
1595	contig_37023	contig_37023_994462	16	36.639	36.639	AB	AB	AA	AB	AB	AA	BB	BB	AB	AB	AA	AB	AB	AB	AB	AB	BB	AB	AA	AB	BB	AA	AB	BB	AB	AA	AB	AA	AB	AB	AA	BB	AA	BB	BB	AB	BB	BB	AA	AB	AB	AB	AB	AA
1596	contig_37023	contig_37023_994502	16	34.626	34.626	AB	AB	AA	AB	AB	AA	BB	BB	AB	AB	AA	AB	AB	AB	AB	AB	BB	AB	AA	AB	BB	AA	AB	BB	AB	AA	AB	AA	AB	AB	AA	BB	AA	BB	BB	AB	BB	BB	AA	AB	AB	AB	AB	AA
1600	contig_37023	contig_37023_995326	16	34.626	34.626	AB	AB	AA	AB	AB	AA	BB	BB	AB	AB	AA	AB	AB	AB	AB	AB	BB	AB	AA	AB	BB	AA	AB	BB	AB	AA	AB	AA	AB	AB	AA	BB	AA	BB	BB	AB	BB	BB	AA	AB	AB	AB	AB	AA
1602	contig_37023	contig_37023_999113	16	36.639	36.639	AB	AB	AA	AB	AB	AA	BB	BB	AB	AB	AA	AB	AB	AB	AB	AB	BB	AB	AA	AB	BB	AA	AB	BB	AB	AA	AB	AA	AB	AB	AA	BB	AA	BB	BB	AB	BB	BB	AA	AB	AB	AB	AB	AA
1603	contig_37023	contig_37023_999136	16	36.639	36.639	AB	AB	AA	AB	AB	AA	BB	BB	AB	AB	AA	AB	AB	AB	AB	AB	BB	AB	AA	AB	BB	AA	AB	BB	AB	AA	AB	AA	AB	AB	AA	BB	AA	BB	BB	AB	BB	BB	AA	AB	AB	AB	AB	AA
1604	contig_37023	contig_37023_999831	16	34.626	34.626	AB	AB	AA	AB	AB	AA	BB	BB	AB	AB	AA	AB	AB	AB	AB	AB	BB	AB	AA	AB	BB	AA	AB	BB	AB	AA	AB	AA	AB	AB	AA	BB	AA	BB	BB	AB	BB	BB	AA	AB	AB	AB	AB	AA
1605	contig_37023	contig_37023_1000173	16	34.626	34.626	AB	AB	AA	AB	AB	AA	BB	BB	AB	AB	AA	AB	AB	AB	AB	AB	BB	AB	AA	AB	BB	AA	AB	BB	AB	AA	AB	AA	AB	AB	AA	BB	AA	BB	BB	AB	BB	BB	AA	AB	AB	AB	AB	AA
1606	contig_37023	contig_37023_1000718	16	36.639	36.639	AB	AB	AA	AB	AB	AA	BB	BB	AB	AB	AA	AB	AB	AB	AB	AB	BB	AB	AA	AB	BB	AA	AB	BB	AB	AA	AB	AA	AB	AB	AA	BB	AA	BB	BB	AB	BB	BB	AA	AB	AB	AB	AB	AA
1607	contig_37023	contig_37023_1001213	16	36.639	36.639	AB	AB	AA	AB	AB	AA	BB	BB	AB	AB	AA	AB	AB	AB	AB	AB	BB	AB	AA	AB	BB	AA	AB	BB	AB	AA	AB	AA	AB	AB	AA	BB	AA	BB	BB	AB	BB	BB	AA	AB	AB	AB	AB	AA
1608	contig_37023	contig_37023_1001311	16	34.626	34.626	AB	AB	AA	AB	AB	AA	BB	BB	AB	AB	AA	AB	AB	AB	AB	AB	BB	AB	AA	AB	BB	AA	AB	BB	AB	AA	AB	AA	AB	AB	AA	BB	AA	BB	BB	AB	BB	BB	AA	AB	AB	AB	AB	AA
1609	contig_37023	contig_37023_1001542	16	35.297	35.297	AB	AB	AA	AB	AB	AA	BB	BB	AB	AB	AA	AB	AB	AB	AB	AB	BB	AB	AA	AB	BB	AA	AB	BB	AB	AA	AB	AA	AB	AB	AA	BB	AA	BB	BB	AB	BB	BB	AA	AB	AB	AB	AB	AA
1610	contig_37023	contig_37023_1001596	16	34.626	34.626	AB	AB	AA	AB	AB	AA	BB	BB	AB	AB	AA	AB	AB	AB	AB	AB	BB	AB	AA	AB	BB	AA	AB	BB	AB	AA	AB	AA	AB	AB	AA	BB	AA	BB	BB	AB	BB	BB	AA	AB	AB	AB	AB	AA
1611	contig_37023	contig_37023_1001597	16	34.626	34.626	AB	AB	AA	AB	AB	AA	BB	BB	AB	AB	AA	AB	AB	AB	AB	AB	BB	AB	AA	AB	BB	AA	AB	BB	AB	AA	AB	AA	AB	AB	AA	BB	AA	BB	BB	AB	BB	BB	AA	AB	AB	AB	AB	AA
1612	contig_37023	contig_37023_1001633	16	36.639	36.639	AB	AB	AA	AB	AB	AA	BB	BB	AB	AB	AA	AB	AB	AB	AB	AB	BB	AB	AA	AB	BB	AA	AB	BB	AB	AA	AB	AA	AB	AB	AA	BB	AA	BB	BB	AB	BB	BB	AA	AB	AB	AB	AB	AA
1613	contig_37023	contig_37023_1001636	16	34.626	34.626	AB	AB	AA	AB	AB	AA	BB	BB	AB	AB	AA	AB	AB	AB	AB	AB	BB	AB	AA	AB	BB	AA	AB	BB	AB	AA	AB	AA	AB	AB	AA	BB	AA	BB	BB	AB	BB	BB	AA	AB	AB	AB	AB	AA
1614	contig_37023	contig_37023_1001671	16	34.626	34.626	AB	AB	AA	AB	AB	AA	BB	BB	AB	AB	AA	AB	AB	AB	AB	AB	BB	AB	AA	AB	BB	AA	AB	BB	AB	AA	AB	AA	AB	AB	AA	BB	AA	BB	BB	AB	BB	BB	AA	AB	AB	AB	AB	AA
1615	contig_37023	contig_37023_1001712	16	36.639	36.639	AB	AB	AA	AB	AB	AA	BB	BB	AB	AB	AA	AB	AB	AB	AB	AB	BB	AB	AA	AB	BB	AA	AB	BB	AB	AA	AB	AA	AB	AB	AA	BB	AA	BB	BB	AB	BB	BB	AA	AB	AB	AB	AB	AA
1616	contig_37023	contig_37023_1001741	16	36.639	36.639	AB	AB	AA	AB	AB	AA	BB	BB	AB	AB	AA	AB	AB	AB	AB	AB	BB	AB	AA	AB	BB	AA	AB	BB	AB	AA	AB	AA	AB	AB	AA	BB	AA	BB	BB	AB	BB	BB	AA	AB	AB	AB	AB	AA
1617	contig_37023	contig_37023_1001851	16	36.639	36.639	AB	AB	AA	AB	AB	AA	BB	BB	AB	AB	AA	AB	AB	AB	AB	AB	BB	AB	AA	AB	BB	AA	AB	BB	AB	AA	AB	AA	AB	AB	AA	BB	AA	BB	BB	AB	BB	BB	AA	AB	AB	AB	AB	AA
1618	contig_37023	contig_37023_1001932	16	34.626	34.626	AB	AB	AA	AB	AB	AA	BB	BB	AB	AB	AA	AB	AB	AB	AB	AB	BB	AB	AA	AB	BB	AA	AB	BB	AB	AA	AB	AA	AB	AB	AA	BB	AA	BB	BB	AB	BB	BB	AA	AB	AB	AB	AB	AA
1619	contig_37023	contig_37023_1001947	16	34.626	34.626	AB	AB	AA	AB	AB	AA	BB	BB	AB	AB	AA	AB	AB	AB	AB	AB	BB	AB	AA	AB	BB	AA	AB	BB	AB	AA	AB	AA	AB	AB	AA	BB	AA	BB	BB	AB	BB	BB	AA	AB	AB	AB	AB	AA
1620	contig_37023	contig_37023_1001978	16	34.626	34.626	AB	AB	AA	AB	AB	AA	BB	BB	AB	AB	AA	AB	AB	AB	AB	AB	BB	AB	AA	AB	BB	AA	AB	BB	AB	AA	AB	AA	AB	AB	AA	BB	AA	BB	BB	AB	BB	BB	AA	AB	AB	AB	AB	AA
1621	contig_37023	contig_37023_1001987	16	34.626	34.626	AB	AB	AA	AB	AB	AA	BB	BB	AB	AB	AA	AB	AB	AB	AB	AB	BB	AB	AA	AB	BB	AA	AB	BB	AB	AA	AB	AA	AB	AB	AA	BB	AA	BB	BB	AB	BB	BB	AA	AB	AB	AB	AB	AA
1622	contig_37023	contig_37023_1002185	16	36.639	36.639	AB	AB	AA	AB	AB	AA	BB	BB	AB	AB	AA	AB	AB	AB	AB	AB	BB	AB	AA	AB	BB	AA	AB	BB	AB	AA	AB	AA	AB	AB	AA	BB	AA	BB	BB	AB	BB	BB	AA	AB	AB	AB	AB	AA
1623	contig_37023	contig_37023_1016799	16	34.626	34.626	AB	AB	AA	AB	AB	AA	BB	BB	AB	AB	AA	AB	AB	AB	AB	AB	BB	AB	AA	AB	BB	AA	AB	BB	AB	AA	AB	AA	AB	AB	AA	BB	AA	BB	BB	AB	BB	BB	AA	AB	AB	AB	AB	AA
1624	contig_37023	contig_37023_1016807	16	35.297	35.297	AB	AB	AA	AB	AB	AA	BB	BB	AB	AB	AA	AB	AB	AB	AB	AB	BB	AB	AA	AB	BB	AA	AB	BB	AB	AA	AB	AA	AB	AB	AA	BB	AA	BB	BB	AB	BB	BB	AA	AB	AB	AB	AB	AA
1626	contig_37023	contig_37023_1017011	16	36.639	36.639	AB	AB	AA	AB	AB	AA	BB	BB	AB	AB	AA	AB	AB	AB	AB	AB	BB	AB	AA	AB	BB	AA	AB	BB	AB	AA	AB	AA	AB	AB	AA	BB	AA	BB	BB	AB	BB	BB	AA	AB	AB	AB	AB	AA
1627	contig_37023	contig_37023_1017033	16	34.626	34.626	AB	AB	AA	AB	AB	AA	BB	BB	AB	AB	AA	AB	AB	AB	AB	AB	BB	AB	AA	AB	BB	AA	AB	BB	AB	AA	AB	AA	AB	AB	AA	BB	AA	BB	BB	AB	BB	BB	AA	AB	AB	AB	AB	AA
1628	contig_37023	contig_37023_1017088	16	34.626	34.626	AB	AB	AA	AB	AB	AA	BB	BB	AB	AB	AA	AB	AB	AB	AB	AB	BB	AB	AA	AB	BB	AA	AB	BB	AB	AA	AB	AA	AB	AB	AA	BB	AA	BB	BB	AB	BB	BB	AA	AB	AB	AB	AB	AA
1629	contig_37023	contig_37023_1018643	16	36.639	36.639	AB	AB	AA	AB	AB	AA	BB	BB	AB	AB	AA	AB	AB	AB	AB	AB	BB	AB	AA	AB	BB	AA	AB	BB	AB	AA	AB	AA	AB	AB	AA	BB	AA	BB	BB	AB	BB	BB	AA	AB	AB	AB	AB	AA
1630	contig_37023	contig_37023_1018795	16	34.626	34.626	AB	AB	AA	AB	AB	AA	BB	BB	AB	AB	AA	AB	AB	AB	AB	AB	BB	AB	AA	AB	BB	AA	AB	BB	AB	AA	AB	AA	AB	AB	AA	BB	AA	BB	BB	AB	BB	BB	AA	AB	AB	AB	AB	AA
1632	contig_37023	contig_37023_1021331	16	34.626	34.626	AB	AB	AA	AB	AB	AA	BB	BB	AB	AB	AA	AB	AB	AB	AB	AB	BB	AB	AA	AB	BB	AA	AB	BB	AB	AA	AB	AA	AB	AB	AA	BB	AA	BB	BB	AB	BB	BB	AA	AB	AB	AB	AB	AA
1635	contig_37023	contig_37023_1021426	16	34.626	34.626	AB	AB	AA	AB	AB	AA	BB	BB	AB	AB	AA	AB	AB	AB	AB	AB	BB	AB	AA	AB	BB	AA	AB	BB	AB	AA	AB	AA	AB	AB	AA	BB	AA	BB	BB	AB	BB	BB	AA	AB	AB	AB	AB	AA
1636	contig_37023	contig_37023_1021430	16	34.626	34.626	AB	AB	AA	AB	AB	AA	BB	BB	AB	AB	AA	AB	AB	AB	AB	AB	BB	AB	AA	AB	BB	AA	AB	BB	AB	AA	AB	AA	AB	AB	AA	BB	AA	BB	BB	AB	BB	BB	AA	AB	AB	AB	AB	AA
1637	contig_37023	contig_37023_1021522	16	36.639	36.639	AB	AB	AA	AB	AB	AA	BB	BB	AB	AB	AA	AB	AB	AB	AB	AB	BB	AB	AA	AB	BB	AA	AB	BB	AB	AA	AB	AA	AB	AB	AA	BB	AA	BB	BB	AB	BB	BB	AA	AB	AB	AB	AB	AA
1638	contig_37023	contig_37023_1021563	16	36.639	36.639	AB	AB	AA	AB	AB	AA	BB	BB	AB	AB	AA	AB	AB	AB	AB	AB	BB	AB	AA	AB	BB	AA	AB	BB	AB	AA	AB	AA	AB	AB	AA	BB	AA	BB	BB	AB	BB	BB	AA	AB	AB	AB	AB	AA
1639	contig_37023	contig_37023_1021734	16	36.639	36.639	AB	AB	AA	AB	AB	AA	BB	BB	AB	AB	AA	AB	AB	AB	AB	AB	BB	AB	AA	AB	BB	AA	AB	BB	AB	AA	AB	AA	AB	AB	AA	BB	AA	BB	BB	AB	BB	BB	AA	AB	AB	AB	AB	AA
1640	contig_37023	contig_37023_1022174	16	36.639	36.639	AB	AB	AA	AB	AB	AA	BB	BB	AB	AB	AA	AB	AB	AB	AB	AB	BB	AB	AA	AB	BB	AA	AB	BB	AB	AA	AB	AA	AB	AB	AA	BB	AA	BB	BB	AB	BB	BB	AA	AB	AB	AB	AB	AA
1641	contig_37023	contig_37023_1029239	16	34.626	34.626	AB	AB	AA	AB	AB	AA	BB	BB	AB	AB	AA	AB	AB	AB	AB	AB	BB	AB	AA	AB	BB	AA	AB	BB	AB	AA	AB	AA	AB	AB	AA	BB	AA	BB	BB	AB	BB	BB	AA	AB	AB	AB	AB	AA
1642	contig_37023	contig_37023_1031966	16	36.639	36.639	AB	AB	AA	AB	AB	AA	BB	BB	AB	AB	AA	AB	AB	AB	AB	AB	BB	AB	AA	AB	BB	AA	AB	BB	AB	AA	AB	AA	AB	AB	AA	BB	AA	BB	BB	AB	BB	BB	AA	AB	AB	AB	AB	AA
1643	contig_37023	contig_37023_1031995	16	34.626	34.626	AB	AB	AA	AB	AB	AA	BB	BB	AB	AB	AA	AB	AB	AB	AB	AB	BB	AB	AA	AB	BB	AA	AB	BB	AB	AA	AB	AA	AB	AB	AA	BB	AA	BB	BB	AB	BB	BB	AA	AB	AB	AB	AB	AA
1644	contig_37023	contig_37023_1037629	16	34.626	34.626	AB	AB	AA	AB	AB	AA	BB	BB	AB	AB	AA	AB	AB	AB	AB	AB	BB	AB	AA	AB	BB	AA	AB	BB	AB	AA	AB	AA	AB	AB	AA	BB	AA	BB	BB	AB	BB	BB	AA	AB	AB	AB	AB	AA
1646	contig_37023	contig_37023_1043272	16	34.626	34.626	AB	AB	AA	AB	AB	AA	BB	BB	AB	AB	AA	AB	AB	AB	AB	AB	BB	AB	AA	AB	BB	AA	AB	BB	AB	AA	AB	AA	AB	AB	AA	BB	AA	BB	BB	AB	BB	BB	AA	AB	AB	AB	AB	AA
1647	contig_37023	contig_37023_1043275	16	36.639	36.639	AB	AB	AA	AB	AB	AA	BB	BB	AB	AB	AA	AB	AB	AB	AB	AB	BB	AB	AA	AB	BB	AA	AB	BB	AB	AA	AB	AA	AB	AB	AA	BB	AA	BB	BB	AB	BB	BB	AA	AB	AB	AB	AB	AA
1648	contig_37023	contig_37023_1043354	16	36.639	36.639	AB	AB	AA	AB	AB	AA	BB	BB	AB	AB	AA	AB	AB	AB	AB	AB	BB	AB	AA	AB	BB	AA	AB	BB	AB	AA	AB	AA	AB	AB	AA	BB	AA	BB	BB	AB	BB	BB	AA	AB	AB	AB	AB	AA
1649	contig_37023	contig_37023_1045325	16	36.639	36.639	AB	AB	AA	AB	AB	AA	BB	BB	AB	AB	AA	AB	AB	AB	AB	AB	BB	AB	AA	AB	BB	AA	AB	BB	AB	AA	AB	AA	AB	AB	AA	BB	AA	BB	BB	AB	BB	BB	AA	AB	AB	AB	AB	AA
1650	contig_37023	contig_37023_1047098	16	34.626	34.626	AB	AB	AA	AB	AB	AA	BB	BB	AB	AB	AA	AB	AB	AB	AB	AB	BB	AB	AA	AB	BB	AA	AB	BB	AB	AA	AB	AA	AB	AB	AA	BB	AA	BB	BB	AB	BB	BB	AA	AB	AB	AB	AB	AA
1651	contig_37023	contig_37023_1047988	16	36.639	36.639	AB	AB	AA	AB	AB	AA	BB	BB	AB	AB	AA	AB	AB	AB	AB	AB	BB	AB	AA	AB	BB	AA	AB	BB	AB	AA	AB	AA	AB	AB	AA	BB	AA	BB	BB	AB	BB	BB	AA	AB	AB	AB	AB	AA
1652	contig_37023	contig_37023_1048010	16	36.639	36.639	AB	AB	AA	AB	AB	AA	BB	BB	AB	AB	AA	AB	AB	AB	AB	AB	BB	AB	AA	AB	BB	AA	AB	BB	AB	AA	AB	AA	AB	AB	AA	BB	AA	BB	BB	AB	BB	BB	AA	AB	AB	AB	AB	AA
1653	contig_37023	contig_37023_1048036	16	36.639	36.639	AB	AB	AA	AB	AB	AA	BB	BB	AB	AB	AA	AB	AB	AB	AB	AB	BB	AB	AA	AB	BB	AA	AB	BB	AB	AA	AB	AA	AB	AB	AA	BB	AA	BB	BB	AB	BB	BB	AA	AB	AB	AB	AB	AA
1654	contig_37023	contig_37023_1048136	16	36.639	36.639	AB	AB	AA	AB	AB	AA	BB	BB	AB	AB	AA	AB	AB	AB	AB	AB	BB	AB	AA	AB	BB	AA	AB	BB	AB	AA	AB	AA	AB	AB	AA	BB	AA	BB	BB	AB	BB	BB	AA	AB	AB	AB	AB	AA
1655	contig_37023	contig_37023_1048182	16	36.639	36.639	AB	AB	AA	AB	AB	AA	BB	BB	AB	AB	AA	AB	AB	AB	AB	AB	BB	AB	AA	AB	BB	AA	AB	BB	AB	AA	AB	AA	AB	AB	AA	BB	AA	BB	BB	AB	BB	BB	AA	AB	AB	AB	AB	AA
1656	contig_37023	contig_37023_1048184	16	36.639	36.639	AB	AB	AA	AB	AB	AA	BB	BB	AB	AB	AA	AB	AB	AB	AB	AB	BB	AB	AA	AB	BB	AA	AB	BB	AB	AA	AB	AA	AB	AB	AA	BB	AA	BB	BB	AB	BB	BB	AA	AB	AB	AB	AB	AA
1657	contig_37023	contig_37023_1048190	16	36.639	36.639	AB	AB	AA	AB	AB	AA	BB	BB	AB	AB	AA	AB	AB	AB	AB	AB	BB	AB	AA	AB	BB	AA	AB	BB	AB	AA	AB	AA	AB	AB	AA	BB	AA	BB	BB	AB	BB	BB	AA	AB	AB	AB	AB	AA
1659	contig_37023	contig_37023_1059961	16	34.626	34.626	AB	AB	AA	AB	AB	AA	BB	BB	AB	AB	AA	AB	AB	AB	AB	AB	BB	AB	AA	AB	BB	AA	AB	BB	AB	AA	AB	AA	AB	AB	AA	BB	AA	BB	BB	AB	BB	BB	AA	AB	AB	AB	AB	AA
1660	contig_37023	contig_37023_1060143	16	34.626	34.626	AB	AB	AA	AB	AB	AA	BB	BB	AB	AB	AA	AB	AB	AB	AB	AB	BB	AB	AA	AB	BB	AA	AB	BB	AB	AA	AB	AA	AB	AB	AA	BB	AA	BB	BB	AB	BB	BB	AA	AB	AB	AB	AB	AA
1661	contig_37023	contig_37023_1065870	16	36.639	36.639	AB	AB	AA	AB	AB	AA	BB	BB	AB	AB	AA	AB	AB	AB	AB	AB	BB	AB	AA	AB	BB	AA	AB	BB	AB	AA	AB	AA	AB	AB	AA	BB	AA	BB	BB	AB	BB	BB	AA	AB	AB	AB	AB	AA
1662	contig_37023	contig_37023_1065903	16	36.639	36.639	AB	AB	AA	AB	AB	AA	BB	BB	AB	AB	AA	AB	AB	AB	AB	AB	BB	AB	AA	AB	BB	AA	AB	BB	AB	AA	AB	AA	AB	AB	AA	BB	AA	BB	BB	AB	BB	BB	AA	AB	AB	AB	AB	AA
1663	contig_37023	contig_37023_1065909	16	36.639	36.639	AB	AB	AA	AB	AB	AA	BB	BB	AB	AB	AA	AB	AB	AB	AB	AB	BB	AB	AA	AB	BB	AA	AB	BB	AB	AA	AB	AA	AB	AB	AA	BB	AA	BB	BB	AB	BB	BB	AA	AB	AB	AB	AB	AA
1664	contig_37023	contig_37023_1072169	16	36.639	36.639	AB	AB	AA	AB	AB	AA	BB	BB	AB	AB	AA	AB	AB	AB	AB	AB	BB	AB	AA	AB	BB	AA	AB	BB	AB	AA	AB	AA	AB	AB	AA	BB	AA	BB	BB	AB	BB	BB	AA	AB	AB	AB	AB	AA
1665	contig_37023	contig_37023_1074200	16	34.626	34.626	AB	AB	AA	AB	AB	AA	BB	BB	AB	AB	AA	AB	AB	AB	AB	AB	BB	AB	AA	AB	BB	AA	AB	BB	AB	AA	AB	AA	AB	AB	AA	BB	AA	BB	BB	AB	BB	BB	AA	AB	AB	AB	AB	AA
1666	contig_37023	contig_37023_1074216	16	36.639	36.639	AB	AB	AA	AB	AB	AA	BB	BB	AB	AB	AA	AB	AB	AB	AB	AB	BB	AB	AA	AB	BB	AA	AB	BB	AB	AA	AB	AA	AB	AB	AA	BB	AA	BB	BB	AB	BB	BB	AA	AB	AB	AB	AB	AA
1667	contig_37023	contig_37023_1074273	16	34.626	34.626	AB	AB	AA	AB	AB	AA	BB	BB	AB	AB	AA	AB	AB	AB	AB	AB	BB	AB	AA	AB	BB	AA	AB	BB	AB	AA	AB	AA	AB	AB	AA	BB	AA	BB	BB	AB	BB	BB	AA	AB	AB	AB	AB	AA
1668	contig_37023	contig_37023_1074288	16	36.639	36.639	AB	AB	AA	AB	AB	AA	BB	BB	AB	AB	AA	AB	AB	AB	AB	AB	BB	AB	AA	AB	BB	AA	AB	BB	AB	AA	AB	AA	AB	AB	AA	BB	AA	BB	BB	AB	BB	BB	AA	AB	AB	AB	AB	AA
1669	contig_37023	contig_37023_1128742	16	34.626	34.626	AB	AB	AA	AB	AB	AA	BB	BB	AB	AB	AA	AB	AB	AB	AB	AB	BB	AB	AA	AB	BB	AA	AB	BB	AB	AA	AB	AA	AB	AB	AA	BB	AA	BB	BB	AB	BB	BB	AA	AB	AB	AB	AB	AA
1670	contig_37023	contig_37023_1128789	16	34.626	34.626	AB	AB	AA	AB	AB	AA	BB	BB	AB	AB	AA	AB	AB	AB	AB	AB	BB	AB	AA	AB	BB	AA	AB	BB	AB	AA	AB	AA	AB	AB	AA	BB	AA	BB	BB	AB	BB	BB	AA	AB	AB	AB	AB	AA
1673	contig_37023	contig_37023_1128845	16	36.639	36.639	AB	AB	AA	AB	AB	AA	BB	BB	AB	AB	AA	AB	AB	AB	AB	AB	BB	AB	AA	AB	BB	AA	AB	BB	AB	AA	AB	AA	AB	AB	AA	BB	AA	BB	BB	AB	BB	BB	AA	AB	AB	AB	AB	AA
1674	contig_37023	contig_37023_1128859	16	36.639	36.639	AB	AB	AA	AB	AB	AA	BB	BB	AB	AB	AA	AB	AB	AB	AB	AB	BB	AB	AA	AB	BB	AA	AB	BB	AB	AA	AB	AA	AB	AB	AA	BB	AA	BB	BB	AB	BB	BB	AA	AB	AB	AB	AB	AA
1675	contig_37023	contig_37023_1128996	16	34.626	34.626	AB	AB	AA	AB	AB	AA	BB	BB	AB	AB	AA	AB	AB	AB	AB	AB	BB	AB	AA	AB	BB	AA	AB	BB	AB	AA	AB	AA	AB	AB	AA	BB	AA	BB	BB	AB	BB	BB	AA	AB	AB	AB	AB	AA
1676	contig_37023	contig_37023_1129042	16	36.639	36.639	AB	AB	AA	AB	AB	AA	BB	BB	AB	AB	AA	AB	AB	AB	AB	AB	BB	AB	AA	AB	BB	AA	AB	BB	AB	AA	AB	AA	AB	AB	AA	BB	AA	BB	BB	AB	BB	BB	AA	AB	AB	AB	AB	AA
1677	contig_37023	contig_37023_1129186	16	34.626	34.626	AB	AB	AA	AB	AB	AA	BB	BB	AB	AB	AA	AB	AB	AB	AB	AB	BB	AB	AA	AB	BB	AA	AB	BB	AB	AA	AB	AA	AB	AB	AA	BB	AA	BB	BB	AB	BB	BB	AA	AB	AB	AB	AB	AA
1678	contig_37023	contig_37023_1129213	16	34.626	34.626	AB	AB	AA	AB	AB	AA	BB	BB	AB	AB	AA	AB	AB	AB	AB	AB	BB	AB	AA	AB	BB	AA	AB	BB	AB	AA	AB	AA	AB	AB	AA	BB	AA	BB	BB	AB	BB	BB	AA	AB	AB	AB	AB	AA
1679	contig_37023	contig_37023_1129218	16	36.639	36.639	AB	AB	AA	AB	AB	AA	BB	BB	AB	AB	AA	AB	AB	AB	AB	AB	BB	AB	AA	AB	BB	AA	AB	BB	AB	AA	AB	AA	AB	AB	AA	BB	AA	BB	BB	AB	BB	BB	AA	AB	AB	AB	AB	AA
1680	contig_37023	contig_37023_1129228	16	34.626	34.626	AB	AB	AA	AB	AB	AA	BB	BB	AB	AB	AA	AB	AB	AB	AB	AB	BB	AB	AA	AB	BB	AA	AB	BB	AB	AA	AB	AA	AB	AB	AA	BB	AA	BB	BB	AB	BB	BB	AA	AB	AB	AB	AB	AA
1681	contig_37023	contig_37023_1129479	16	36.639	36.639	AB	AB	AA	AB	AB	AA	BB	BB	AB	AB	AA	AB	AB	AB	AB	AB	BB	AB	AA	AB	BB	AA	AB	BB	AB	AA	AB	AA	AB	AB	AA	BB	AA	BB	BB	AB	BB	BB	AA	AB	AB	AB	AB	AA
1682	contig_37023	contig_37023_1129480	16	34.626	34.626	AB	AB	AA	AB	AB	AA	BB	BB	AB	AB	AA	AB	AB	AB	AB	AB	BB	AB	AA	AB	BB	AA	AB	BB	AB	AA	AB	AA	AB	AB	AA	BB	AA	BB	BB	AB	BB	BB	AA	AB	AB	AB	AB	AA
1683	contig_37023	contig_37023_1129568	16	36.639	36.639	AB	AB	AA	AB	AB	AA	BB	BB	AB	AB	AA	AB	AB	AB	AB	AB	BB	AB	AA	AB	BB	AA	AB	BB	AB	AA	AB	AA	AB	AB	AA	BB	AA	BB	BB	AB	BB	BB	AA	AB	AB	AB	AB	AA
1684	contig_37023	contig_37023_1129750	16	34.626	34.626	AB	AB	AA	AB	AB	AA	BB	BB	AB	AB	AA	AB	AB	AB	AB	AB	BB	AB	AA	AB	BB	AA	AB	BB	AB	AA	AB	AA	AB	AB	AA	BB	AA	BB	BB	AB	BB	BB	AA	AB	AB	AB	AB	AA
1685	contig_37023	contig_37023_1137569	16	34.626	34.626	AB	AB	AA	AB	AB	AA	BB	BB	AB	AB	AA	AB	AB	AB	AB	AB	BB	AB	AA	AB	BB	AA	AB	BB	AB	AA	AB	AA	AB	AB	AA	BB	AA	BB	BB	AB	BB	BB	AA	AB	AB	AB	AB	AA
1686	contig_37023	contig_37023_1137631	16	34.626	34.626	AB	AB	AA	AB	AB	AA	BB	BB	AB	AB	AA	AB	AB	AB	AB	AB	BB	AB	AA	AB	BB	AA	AB	BB	AB	AA	AB	AA	AB	AB	AA	BB	AA	BB	BB	AB	BB	BB	AA	AB	AB	AB	AB	AA
1687	contig_37023	contig_37023_1141167	16	34.626	34.626	AB	AB	AA	AB	AB	AA	BB	BB	AB	AB	AA	AB	AB	AB	AB	AB	BB	AB	AA	AB	BB	AA	AB	BB	AB	AA	AB	AA	AB	AB	AA	BB	AA	BB	BB	AB	BB	BB	AA	AB	AB	AB	AB	AA
1688	contig_37023	contig_37023_1141187	16	34.626	34.626	AB	AB	AA	AB	AB	AA	BB	BB	AB	AB	AA	AB	AB	AB	AB	AB	BB	AB	AA	AB	BB	AA	AB	BB	AB	AA	AB	AA	AB	AB	AA	BB	AA	BB	BB	AB	BB	BB	AA	AB	AB	AB	AB	AA
1689	contig_37023	contig_37023_1142369	16	34.626	34.626	AB	AB	AA	AB	AB	AA	BB	BB	AB	AB	AA	AB	AB	AB	AB	AB	BB	AB	AA	AB	BB	AA	AB	BB	AB	AA	AB	AA	AB	AB	AA	BB	AA	BB	BB	AB	BB	BB	AA	AB	AB	AB	AB	AA
1690	contig_37023	contig_37023_1142417	16	36.639	36.639	AB	AB	AA	AB	AB	AA	BB	BB	AB	AB	AA	AB	AB	AB	AB	AB	BB	AB	AA	AB	BB	AA	AB	BB	AB	AA	AB	AA	AB	AB	AA	BB	AA	BB	BB	AB	BB	BB	AA	AB	AB	AB	AB	AA
1691	contig_37023	contig_37023_1145647	16	34.626	34.626	AB	AB	AA	AB	AB	AA	BB	BB	AB	AB	AA	AB	AB	AB	AB	AB	BB	AB	AA	AB	BB	AA	AB	BB	AB	AA	AB	AA	AB	AB	AA	BB	AA	BB	BB	AB	BB	BB	AA	AB	AB	AB	AB	AA
1692	contig_37023	contig_37023_1145820	16	36.639	36.639	AB	AB	AA	AB	AB	AA	BB	BB	AB	AB	AA	AB	AB	AB	AB	AB	BB	AB	AA	AB	BB	AA	AB	BB	AB	AA	AB	AA	AB	AB	AA	BB	AA	BB	BB	AB	BB	BB	AA	AB	AB	AB	AB	AA
1693	contig_37023	contig_37023_1145982	16	36.639	36.639	AB	AB	AA	AB	AB	AA	BB	BB	AB	AB	AA	AB	AB	AB	AB	AB	BB	AB	AA	AB	BB	AA	AB	BB	AB	AA	AB	AA	AB	AB	AA	BB	AA	BB	BB	AB	BB	BB	AA	AB	AB	AB	AB	AA
1694	contig_37023	contig_37023_1146333	16	34.626	34.626	AB	AB	AA	AB	AB	AA	BB	BB	AB	AB	AA	AB	AB	AB	AB	AB	BB	AB	AA	AB	BB	AA	AB	BB	AB	AA	AB	AA	AB	AB	AA	BB	AA	BB	BB	AB	BB	BB	AA	AB	AB	AB	AB	AA
1695	contig_37023	contig_37023_1147547	16	36.639	36.639	AB	AB	AA	AB	AB	AA	BB	BB	AB	AB	AA	AB	AB	AB	AB	AB	BB	AB	AA	AB	BB	AA	AB	BB	AB	AA	AB	AA	AB	AB	AA	BB	AA	BB	BB	AB	BB	BB	AA	AB	AB	AB	AB	AA
1697	contig_37023	contig_37023_1172818	16	34.626	34.626	AB	AB	AA	AB	AB	AA	BB	BB	AB	AB	AA	AB	AB	AB	AB	AB	BB	AB	AA	AB	BB	AA	AB	BB	AB	AA	AB	AA	AB	AB	AA	BB	AA	BB	BB	AB	BB	BB	AA	AB	AB	AB	AB	AA
1698	contig_37023	contig_37023_1174926	16	34.626	34.626	AB	AB	AA	AB	AB	AA	BB	BB	AB	AB	AA	AB	AB	AB	AB	AB	BB	AB	AA	AB	BB	AA	AB	BB	AB	AA	AB	AA	AB	AB	AA	BB	AA	BB	BB	AB	BB	BB	AA	AB	AB	AB	AB	AA
1700	contig_37023	contig_37023_1176423	16	35.297	35.297	AB	AB	AA	AB	AB	AA	BB	BB	AB	AB	AA	AB	AB	AB	AB	AB	BB	AB	AA	AB	BB	AA	AB	BB	AB	AA	AB	AA	AB	AB	AA	BB	AA	BB	BB	AB	BB	BB	AA	AB	AB	AB	AB	AA
1701	contig_37023	contig_37023_1176424	16	34.626	34.626	AB	AB	AA	AB	AB	AA	BB	BB	AB	AB	AA	AB	AB	AB	AB	AB	BB	AB	AA	AB	BB	AA	AB	BB	AB	AA	AB	AA	AB	AB	AA	BB	AA	BB	BB	AB	BB	BB	AA	AB	AB	AB	AB	AA
1702	contig_37023	contig_37023_1194341	16	34.626	34.626	AB	AB	AA	AB	AB	AA	BB	BB	AB	AB	AA	AB	AB	AB	AB	AB	BB	AB	AA	AB	BB	AA	AB	BB	AB	AA	AB	AA	AB	AB	AA	BB	AA	BB	BB	AB	BB	BB	AA	AB	AB	AB	AB	AA
1703	contig_37023	contig_37023_1205736	16	37.311	37.311	AB	AB	AA	AB	AB	AA	BB	BB	AB	AB	AA	AB	AB	AB	AB	AB	BB	AB	AA	AB	BB	AA	AB	BB	AB	AA	AB	AA	AB	AB	AA	AB	AA	BB	BB	AB	BB	BB	AA	AB	AB	AB	AB	AA
1704	contig_37023	contig_37023_1205748	16	34.626	34.626	AB	AB	AA	AB	AB	AA	BB	BB	AB	AB	AA	AB	AB	AB	AB	AB	BB	AB	AA	AB	BB	AA	AB	BB	AB	AA	AB	AA	AB	AB	AA	BB	AA	BB	BB	AB	BB	BB	AA	AB	AB	AB	AB	AA
1720	contig_37023	contig_37023_1213127	16	40.675	40.675	AB	AB	AA	AB	AB	AA	BB	BB	AB	AB	AA	AB	AB	AB	AB	AB	BB	AB	AA	AB	AB	AA	AB	BB	AB	AA	AB	AA	AB	AB	AA	AB	AA	BB	BB	AB	AB	AB	AA	AB	AB	AB	AB	AA
1723	contig_37023	contig_37023_1222111	16	36.639	36.639	AB	AB	AA	AB	AB	AA	BB	BB	AB	AB	AA	AB	AB	AB	AB	AB	BB	AB	AA	AB	BB	AA	AB	BB	AB	AA	AB	AA	AB	AB	AA	BB	AA	BB	BB	AB	BB	BB	AA	AB	AB	AB	AB	AA
1724	contig_37023	contig_37023_1228210	16	34.626	34.626	AB	AB	AA	AB	AB	AA	BB	BB	AB	AB	AA	AB	AB	AB	AB	AB	BB	AB	AA	AB	BB	AA	AB	BB	AB	AA	AB	AA	AB	AB	AA	BB	AA	BB	BB	AB	BB	BB	AA	AB	AB	AB	AB	AA
1725	contig_37023	contig_37023_1228845	16	34.626	34.626	AB	AB	AA	AB	AB	AA	BB	BB	AB	AB	AA	AB	AB	AB	AB	AB	BB	AB	AA	AB	BB	AA	AB	BB	AB	AA	AB	AA	AB	AB	AA	BB	AA	BB	BB	AB	BB	BB	AA	AB	AB	AB	AB	AA
1738	contig_37023	contig_37023_1240238	16	36.639	36.639	AB	AB	AA	AB	AB	AA	BB	BB	AB	AB	AA	AB	AB	AB	AB	AB	BB	AB	AA	AB	BB	AA	AB	BB	AB	AA	AB	AA	AB	AB	AA	BB	AA	BB	BB	AB	BB	BB	AA	AB	AB	AB	AB	AA
1743	contig_37023	contig_37023_1254436	16	36.639	36.639	AB	AB	AA	AB	AB	AA	BB	BB	AB	AB	AA	AB	AB	AB	AB	AB	BB	AB	AA	AB	BB	AA	AB	BB	AB	AA	AB	AA	AB	AB	AA	BB	AA	BB	BB	AB	BB	BB	AA	AB	AB	AB	AB	AA
1744	contig_37023	contig_37023_1254464	16	36.639	36.639	AB	AB	AA	AB	AB	AA	BB	BB	AB	AB	AA	AB	AB	AB	AB	AB	BB	AB	AA	AB	BB	AA	AB	BB	AB	AA	AB	AA	AB	AB	AA	BB	AA	BB	BB	AB	BB	BB	AA	AB	AB	AB	AB	AA
1745	contig_37023	contig_37023_1255772	16	36.639	36.639	AB	AB	AA	AB	AB	AA	BB	BB	AB	AB	AA	AB	AB	AB	AB	AB	BB	AB	AA	AB	BB	AA	AB	BB	AB	AA	AB	AA	AB	AB	AA	BB	AA	BB	BB	AB	BB	BB	AA	AB	AB	AB	AB	AA
1747	contig_37023	contig_37023_1256684	16	36.639	36.639	AB	AB	AA	AB	AB	AA	BB	BB	AB	AB	AA	AB	AB	AB	AB	AB	BB	AB	AA	AB	BB	AA	AB	BB	AB	AA	AB	AA	AB	AB	AA	BB	AA	BB	BB	AB	BB	BB	AA	AB	AB	AB	AB	AA
1749	contig_37023	contig_37023_1265729	16	36.639	36.639	AB	AB	AA	AB	AB	AA	BB	BB	AB	AB	AA	AB	AB	AB	AB	AB	BB	AB	AA	AB	BB	AA	AB	BB	AB	AA	AB	AA	AB	AB	AA	BB	AA	BB	BB	AB	BB	BB	AA	AB	AB	AB	AB	AA
1751	contig_49668	contig_49668_1782	19	40.977	40.977	AB	AB	BB	AB	AB	AB	BB	AB	AB	AA	AB	AB	AB	BB	BB	AB	AA	AA	AB	AA	AB	AA	BB	AA	BB	BB	AB	AB	BB	AB	AA	AB	AA	BB	AB	AB	AB	AB	AB	AB	BB	BB	AA	AA
1752	contig_49668	contig_49668_7120	19	40.977	40.977	AB	AB	BB	AB	AB	AB	BB	AB	AB	AA	AB	AB	AB	BB	BB	AB	AA	AA	AB	AA	AB	AA	BB	AA	BB	BB	AB	AB	BB	AB	AA	AB	AA	BB	AB	AB	AB	AB	AB	AB	BB	BB	AA	AA
1753	contig_49668	contig_49668_9814	19	40.977	40.977	AB	AB	BB	AB	AB	AB	BB	AB	AB	AA	AB	AB	AB	BB	BB	AB	AA	AA	AB	AA	AB	AA	BB	AA	BB	BB	AB	AB	BB	AB	AA	AB	AA	BB	AB	AB	AB	AB	AB	AB	BB	BB	AA	AA
1754	contig_49668	contig_49668_16912	19	40.977	40.977	AB	AB	BB	AB	AB	AB	BB	AB	AB	AA	AB	AB	AB	BB	BB	AB	AA	AA	AB	AA	AB	AA	BB	AA	BB	BB	AB	AB	BB	AB	AA	AB	AA	BB	AB	AB	AB	AB	AB	AB	BB	BB	AA	AA
1755	contig_49668	contig_49668_16913	19	40.977	40.977	AB	AB	BB	AB	AB	AB	BB	AB	AB	AA	AB	AB	AB	BB	BB	AB	AA	AA	AB	AA	AB	AA	BB	AA	BB	BB	AB	AB	BB	AB	AA	AB	AA	BB	AB	AB	AB	AB	AB	AB	BB	BB	AA	AA
1756	contig_49668	contig_49668_17048	19	40.977	40.977	AB	AB	BB	AB	AB	AB	BB	AB	AB	AA	AB	AB	AB	BB	BB	AB	AA	AA	AB	AA	AB	AA	BB	AA	BB	BB	AB	AB	BB	AB	AA	AB	AA	BB	AB	AB	AB	AB	AB	AB	BB	BB	AA	AA
1757	contig_49668	contig_49668_17054	19	40.977	40.977	AB	AB	BB	AB	AB	AB	BB	AB	AB	AA	AB	AB	AB	BB	BB	AB	AA	AA	AB	AA	AB	AA	BB	AA	BB	BB	AB	AB	BB	AB	AA	AB	AA	BB	AB	AB	AB	AB	AB	AB	BB	BB	AA	AA
1758	contig_49668	contig_49668_17118	19	40.977	40.977	AB	AB	BB	AB	AB	AB	BB	AB	AB	AA	AB	AB	AB	BB	BB	AB	AA	AA	AB	AA	AB	AA	BB	AA	BB	BB	AB	AB	BB	AB	AA	AB	AA	BB	AB	AB	AB	AB	AB	AB	BB	BB	AA	AA
1759	contig_49668	contig_49668_17157	19	40.977	40.977	AB	AB	BB	AB	AB	AB	BB	AB	AB	AA	AB	AB	AB	BB	BB	AB	AA	AA	AB	AA	AB	AA	BB	AA	BB	BB	AB	AB	BB	AB	AA	AB	AA	BB	AB	AB	AB	AB	AB	AB	BB	BB	AA	AA
1760	contig_49668	contig_49668_17190	19	40.977	40.977	AB	AB	BB	AB	AB	AB	BB	AB	AB	AA	AB	AB	AB	BB	BB	AB	AA	AA	AB	AA	AB	AA	BB	AA	BB	BB	AB	AB	BB	AB	AA	AB	AA	BB	AB	AB	AB	AB	AB	AB	BB	BB	AA	AA
1761	contig_49668	contig_49668_17260	19	40.977	40.977	AB	AB	BB	AB	AB	AB	BB	AB	AB	AA	AB	AB	AB	BB	BB	AB	AA	AA	AB	AA	AB	AA	BB	AA	BB	BB	AB	AB	BB	AB	AA	AB	AA	BB	AB	AB	AB	AB	AB	AB	BB	BB	AA	AA
1762	contig_49668	contig_49668_38956	19	39.634	39.634	AB	AB	BB	AB	AB	AB	BB	AB	AB	AA	AB	AB	AB	BB	BB	AB	AA	AA	AB	AA	AB	AA	AB	AA	BB	BB	AB	AB	BB	AB	AA	AB	AA	BB	AB	AB	AB	AB	AB	AB	BB	BB	AA	AA
1763	contig_49668	contig_49668_38973	19	39.634	39.634	AB	AB	BB	AB	AB	AB	BB	AB	AB	AA	AB	AB	AB	BB	BB	AB	AA	AA	AB	AA	AB	AA	AB	AA	BB	BB	AB	AB	BB	AB	AA	AB	AA	BB	AB	AB	AB	AB	AB	AB	BB	BB	AA	AA
1765	contig_18270	contig_18270_4196	3	65.902	65.902	AB	AB	AA	AB	AB	AB	AB	AB	AB	AB	AB	AB	AA	AB	AA	AB	BB	AB	BB	AA	AA	AB	AB	AB	AA	AA	BB	AA	AA	AA	BB	AB	AB	AB	AB	AA	AB	AB	BB	AB	BB	AB	AA	AB
1766	contig_18270	contig_18270_5739	3	68.586	68.586	AB	AB	AA	AB	AB	AB	AB	AB	BB	AB	AB	AB	AA	AA	AA	AB	BB	AB	BB	AA	AA	AB	BB	AB	AA	AA	BB	AA	AA	AA	BB	AB	AB	AB	AB	AA	AB	AB	BB	AB	BB	AB	AA	AB
1767	contig_18270	contig_18270_5758	3	65.902	65.902	AB	AB	AA	AB	AB	AB	AB	AB	AB	AB	AB	AB	AA	AB	AA	AB	BB	AB	BB	AA	AA	AB	AB	AB	AA	AA	BB	AA	AA	AA	BB	AB	AB	AB	AB	AA	AB	AB	BB	AB	BB	AB	AA	AB
1768	contig_18270	contig_18270_5801	3	65.902	65.902	AB	AB	AA	AB	AB	AB	AB	AB	AB	AB	AB	AB	AA	AB	AA	AB	BB	AB	BB	AA	AA	AB	AB	AB	AA	AA	BB	AA	AA	AA	BB	AB	AB	AB	AB	AA	AB	AB	BB	AB	BB	AB	AA	AB
1769	contig_18270	contig_18270_5830	3	68.586	68.586	AB	AB	AA	AB	AB	AB	AB	AB	BB	AB	AB	AB	AA	AA	AA	AB	BB	AB	BB	AA	AA	AB	BB	AB	AA	AA	BB	AA	AA	AA	BB	AB	AB	AB	AB	AA	AB	AB	BB	AB	BB	AB	AA	AB
1770	contig_18270	contig_18270_5832	3	65.902	65.902	AB	AB	AA	AB	AB	AB	AB	AB	AB	AB	AB	AB	AA	AB	AA	AB	BB	AB	BB	AA	AA	AB	AB	AB	AA	AA	BB	AA	AA	AA	BB	AB	AB	AB	AB	AA	AB	AB	BB	AB	BB	AB	AA	AB
1771	contig_18270	contig_18270_5846	3	65.902	65.902	AB	AB	AA	AB	AB	AB	AB	AB	AB	AB	AB	AB	AA	AB	AA	AB	BB	AB	BB	AA	AA	AB	AB	AB	AA	AA	BB	AA	AA	AA	BB	AB	AB	AB	AB	AA	AB	AB	BB	AB	BB	AB	AA	AB
1772	contig_18270	contig_18270_5848	3	65.902	65.902	AB	AB	AA	AB	AB	AB	AB	AB	AB	AB	AB	AB	AA	AB	AA	AB	BB	AB	BB	AA	AA	AB	AB	AB	AA	AA	BB	AA	AA	AA	BB	AB	AB	AB	AB	AA	AB	AB	BB	AB	BB	AB	AA	AB
1773	contig_18270	contig_18270_5876	3	68.586	68.586	AB	AB	AA	AB	AB	AB	AB	AB	BB	AB	AB	AB	AA	AA	AA	AB	BB	AB	BB	AA	AA	AB	BB	AB	AA	AA	BB	AA	AA	AA	BB	AB	AB	AB	AB	AA	AB	AB	BB	AB	BB	AB	AA	AB
1774	contig_18270	contig_18270_5885	3	65.902	65.902	AB	AB	AA	AB	AB	AB	AB	AB	AB	AB	AB	AB	AA	AB	AA	AB	BB	AB	BB	AA	AA	AB	AB	AB	AA	AA	BB	AA	AA	AA	BB	AB	AB	AB	AB	AA	AB	AB	BB	AB	BB	AB	AA	AB
1775	contig_18270	contig_18270_6011	3	68.586	68.586	AB	AB	AA	AB	AB	AB	AB	AB	BB	AB	AB	AB	AA	AA	AA	AB	BB	AB	BB	AA	AA	AB	BB	AB	AA	AA	BB	AA	AA	AA	BB	AB	AB	AB	AB	AA	AB	AB	BB	AB	BB	AB	AA	AB
1776	contig_18270	contig_18270_6027	3	65.902	65.902	AB	AB	AA	AB	AB	AB	AB	AB	AB	AB	AB	AB	AA	AB	AA	AB	BB	AB	BB	AA	AA	AB	AB	AB	AA	AA	BB	AA	AA	AA	BB	AB	AB	AB	AB	AA	AB	AB	BB	AB	BB	AB	AA	AB
1777	contig_18270	contig_18270_31705	3	68.586	68.586	AB	AB	AA	AB	AB	AB	AB	AB	BB	AB	AB	AB	AA	AA	AA	AB	BB	AB	BB	AA	AA	AB	BB	AB	AA	AA	BB	AA	AA	AA	BB	AB	AB	AB	AB	AA	AB	AB	BB	AB	BB	AB	AA	AB
1780	contig_18270	contig_18270_101833	3	65.902	65.902	AB	AB	AA	AB	AB	AB	AB	AB	AB	AB	AB	AB	AA	AB	AA	AB	BB	AB	BB	AA	AA	AB	AB	AB	AA	AA	BB	AA	AA	AA	BB	AB	AB	AB	AB	AA	AB	AB	BB	AB	BB	AB	AA	AB
1781	contig_18270	contig_18270_101896	3	65.902	65.902	AB	AB	AA	AB	AB	AB	AB	AB	AB	AB	AB	AB	AA	AB	AA	AB	BB	AB	BB	AA	AA	AB	AB	AB	AA	AA	BB	AA	AA	AA	BB	AB	AB	AB	AB	AA	AB	AB	BB	AB	BB	AB	AA	AB
1782	contig_18270	contig_18270_102249	3	65.902	65.902	AB	AB	AA	AB	AB	AB	AB	AB	AB	AB	AB	AB	AA	AB	AA	AB	BB	AB	BB	AA	AA	AB	AB	AB	AA	AA	BB	AA	AA	AA	BB	AB	AB	AB	AB	AA	AB	AB	BB	AB	BB	AB	AA	AB
1783	contig_18270	contig_18270_105650	3	68.586	68.586	AB	AB	AA	AB	AB	AB	AB	AB	BB	AB	AB	AB	AA	AA	AA	AB	BB	AB	BB	AA	AA	AB	BB	AB	AA	AA	BB	AA	AA	AA	BB	AB	AB	AB	AB	AA	AB	AB	BB	AB	BB	AB	AA	AB
1784	contig_18270	contig_18270_108012	3	65.902	65.902	AB	AB	AA	AB	AB	AB	AB	AB	AB	AB	AB	AB	AA	AB	AA	AB	BB	AB	BB	AA	AA	AB	AB	AB	AA	AA	BB	AA	AA	AA	BB	AB	AB	AB	AB	AA	AB	AB	BB	AB	BB	AB	AA	AB
1785	contig_18270	contig_18270_118201	3	65.902	65.902	AB	AB	AA	AB	AB	AB	AB	AB	AB	AB	AB	AB	AA	AB	AA	AB	BB	AB	BB	AA	AA	AB	AB	AB	AA	AA	BB	AA	AA	AA	BB	AB	AB	AB	AB	AA	AB	AB	BB	AB	BB	AB	AA	AB
1786	contig_18270	contig_18270_118205	3	65.902	65.902	AB	AB	AA	AB	AB	AB	AB	AB	AB	AB	AB	AB	AA	AB	AA	AB	BB	AB	BB	AA	AA	AB	AB	AB	AA	AA	BB	AA	AA	AA	BB	AB	AB	AB	AB	AA	AB	AB	BB	AB	BB	AB	AA	AB
1787	contig_18270	contig_18270_118261	3	65.902	65.902	AB	AB	AA	AB	AB	AB	AB	AB	AB	AB	AB	AB	AA	AB	AA	AB	BB	AB	BB	AA	AA	AB	AB	AB	AA	AA	BB	AA	AA	AA	BB	AB	AB	AB	AB	AA	AB	AB	BB	AB	BB	AB	AA	AB
1788	contig_18270	contig_18270_118279	3	68.586	68.586	AB	AB	AA	AB	AB	AB	AB	AB	BB	AB	AB	AB	AA	AA	AA	AB	BB	AB	BB	AA	AA	AB	BB	AB	AA	AA	BB	AA	AA	AA	BB	AB	AB	AB	AB	AA	AB	AB	BB	AB	BB	AB	AA	AB
1789	contig_18270	contig_18270_118280	3	68.586	68.586	AB	AB	AA	AB	AB	AB	AB	AB	BB	AB	AB	AB	AA	AA	AA	AB	BB	AB	BB	AA	AA	AB	BB	AB	AA	AA	BB	AA	AA	AA	BB	AB	AB	AB	AB	AA	AB	AB	BB	AB	BB	AB	AA	AB
1790	contig_18270	contig_18270_118305	3	68.586	68.586	AB	AB	AA	AB	AB	AB	AB	AB	BB	AB	AB	AB	AA	AA	AA	AB	BB	AB	BB	AA	AA	AB	BB	AB	AA	AA	BB	AA	AA	AA	BB	AB	AB	AB	AB	AA	AB	AB	BB	AB	BB	AB	AA	AB
1791	contig_18270	contig_18270_124522	3	68.586	68.586	AB	AB	AA	AB	AB	AB	AB	AB	BB	AB	AB	AB	AA	AA	AA	AB	BB	AB	BB	AA	AA	AB	BB	AB	AA	AA	BB	AA	AA	AA	BB	AB	AB	AB	AB	AA	AB	AB	BB	AB	BB	AB	AA	AB
1792	contig_18270	contig_18270_133466	3	65.902	65.902	AB	AB	AA	AB	AB	AB	AB	AB	AB	AB	AB	AB	AA	AB	AA	AB	BB	AB	BB	AA	AA	AB	AB	AB	AA	AA	BB	AA	AA	AA	BB	AB	AB	AB	AB	AA	AB	AB	BB	AB	BB	AB	AA	AB
1793	contig_18270	contig_18270_133479	3	65.902	65.902	AB	AB	AA	AB	AB	AB	AB	AB	AB	AB	AB	AB	AA	AB	AA	AB	BB	AB	BB	AA	AA	AB	AB	AB	AA	AA	BB	AA	AA	AA	BB	AB	AB	AB	AB	AA	AB	AB	BB	AB	BB	AB	AA	AB
1794	contig_18270	contig_18270_133569	3	68.586	68.586	AB	AB	AA	AB	AB	AB	AB	AB	BB	AB	AB	AB	AA	AA	AA	AB	BB	AB	BB	AA	AA	AB	BB	AB	AA	AA	BB	AA	AA	AA	BB	AB	AB	AB	AB	AA	AB	AB	BB	AB	BB	AB	AA	AB
1795	contig_18270	contig_18270_133637	3	65.902	65.902	AB	AB	AA	AB	AB	AB	AB	AB	AB	AB	AB	AB	AA	AB	AA	AB	BB	AB	BB	AA	AA	AB	AB	AB	AA	AA	BB	AA	AA	AA	BB	AB	AB	AB	AB	AA	AB	AB	BB	AB	BB	AB	AA	AB
1796	contig_18270	contig_18270_142802	3	67.244	67.244	AB	AB	AA	AB	AB	AB	AB	AB	BB	AB	AB	AB	AA	AA	AA	AB	BB	AB	BB	AA	AA	AB	AB	AB	AA	AA	BB	AA	AA	AA	BB	AB	AB	AB	AB	AA	AB	AB	BB	AB	BB	AB	AA	AB
1797	contig_18270	contig_18270_142833	3	68.586	68.586	AB	AB	AA	AB	AB	AB	AB	AB	BB	AB	AB	AB	AA	AA	AA	AB	BB	AB	BB	AA	AA	AB	BB	AB	AA	AA	BB	AA	AA	AA	BB	AB	AB	AB	AB	AA	AB	AB	BB	AB	BB	AB	AA	AB
1798	contig_18270	contig_18270_143679	3	65.902	65.902	AB	AB	AA	AB	AB	AB	AB	AB	AB	AB	AB	AB	AA	AB	AA	AB	BB	AB	BB	AA	AA	AB	AB	AB	AA	AA	BB	AA	AA	AA	BB	AB	AB	AB	AB	AA	AB	AB	BB	AB	BB	AB	AA	AB
1799	contig_18270	contig_18270_143708	3	65.902	65.902	AB	AB	AA	AB	AB	AB	AB	AB	AB	AB	AB	AB	AA	AB	AA	AB	BB	AB	BB	AA	AA	AB	AB	AB	AA	AA	BB	AA	AA	AA	BB	AB	AB	AB	AB	AA	AB	AB	BB	AB	BB	AB	AA	AB
1800	contig_18270	contig_18270_144044	3	68.586	68.586	AB	AB	AA	AB	AB	AB	AB	AB	BB	AB	AB	AB	AA	AA	AA	AB	BB	AB	BB	AA	AA	AB	BB	AB	AA	AA	BB	AA	AA	AA	BB	AB	AB	AB	AB	AA	AB	AB	BB	AB	BB	AB	AA	AB
1801	contig_18270	contig_18270_144066	3	65.902	65.902	AB	AB	AA	AB	AB	AB	AB	AB	AB	AB	AB	AB	AA	AB	AA	AB	BB	AB	BB	AA	AA	AB	AB	AB	AA	AA	BB	AA	AA	AA	BB	AB	AB	AB	AB	AA	AB	AB	BB	AB	BB	AB	AA	AB
1802	contig_18270	contig_18270_144068	3	68.586	68.586	AB	AB	AA	AB	AB	AB	AB	AB	BB	AB	AB	AB	AA	AA	AA	AB	BB	AB	BB	AA	AA	AB	BB	AB	AA	AA	BB	AA	AA	AA	BB	AB	AB	AB	AB	AA	AB	AB	BB	AB	BB	AB	AA	AB
1803	contig_18270	contig_18270_144098	3	65.902	65.902	AB	AB	AA	AB	AB	AB	AB	AB	AB	AB	AB	AB	AA	AB	AA	AB	BB	AB	BB	AA	AA	AB	AB	AB	AA	AA	BB	AA	AA	AA	BB	AB	AB	AB	AB	AA	AB	AB	BB	AB	BB	AB	AA	AB
1804	contig_18270	contig_18270_152837	3	65.902	65.902	AB	AB	AA	AB	AB	AB	AB	AB	AB	AB	AB	AB	AA	AB	AA	AB	BB	AB	BB	AA	AA	AB	AB	AB	AA	AA	BB	AA	AA	AA	BB	AB	AB	AB	AB	AA	AB	AB	BB	AB	BB	AB	AA	AB
1805	contig_18270	contig_18270_159175	3	68.586	68.586	AB	AB	AA	AB	AB	AB	AB	AB	BB	AB	AB	AB	AA	AA	AA	AB	BB	AB	BB	AA	AA	AB	BB	AB	AA	AA	BB	AA	AA	AA	BB	AB	AB	AB	AB	AA	AB	AB	BB	AB	BB	AB	AA	AB
1806	contig_18270	contig_18270_159409	3	65.902	65.902	AB	AB	AA	AB	AB	AB	AB	AB	AB	AB	AB	AB	AA	AB	AA	AB	BB	AB	BB	AA	AA	AB	AB	AB	AA	AA	BB	AA	AA	AA	BB	AB	AB	AB	AB	AA	AB	AB	BB	AB	BB	AB	AA	AB
1807	contig_18270	contig_18270_159444	3	65.902	65.902	AB	AB	AA	AB	AB	AB	AB	AB	AB	AB	AB	AB	AA	AB	AA	AB	BB	AB	BB	AA	AA	AB	AB	AB	AA	AA	BB	AA	AA	AA	BB	AB	AB	AB	AB	AA	AB	AB	BB	AB	BB	AB	AA	AB
1808	contig_18270	contig_18270_159447	3	68.586	68.586	AB	AB	AA	AB	AB	AB	AB	AB	BB	AB	AB	AB	AA	AA	AA	AB	BB	AB	BB	AA	AA	AB	BB	AB	AA	AA	BB	AA	AA	AA	BB	AB	AB	AB	AB	AA	AB	AB	BB	AB	BB	AB	AA	AB
1810	contig_18270	contig_18270_174871	3	68.586	68.586	AB	AB	AA	AB	AB	AB	AB	AB	BB	AB	AB	AB	AA	AA	AA	AB	BB	AB	BB	AA	AA	AB	BB	AB	AA	AA	BB	AA	AA	AA	BB	AB	AB	AB	AB	AA	AB	AB	BB	AB	BB	AB	AA	AB
1811	contig_18270	contig_18270_181118	3	65.902	65.902	AB	AB	AA	AB	AB	AB	AB	AB	AB	AB	AB	AB	AA	AB	AA	AB	BB	AB	BB	AA	AA	AB	AB	AB	AA	AA	BB	AA	AA	AA	BB	AB	AB	AB	AB	AA	AB	AB	BB	AB	BB	AB	AA	AB
1812	contig_18270	contig_18270_181120	3	65.902	65.902	AB	AB	AA	AB	AB	AB	AB	AB	AB	AB	AB	AB	AA	AB	AA	AB	BB	AB	BB	AA	AA	AB	AB	AB	AA	AA	BB	AA	AA	AA	BB	AB	AB	AB	AB	AA	AB	AB	BB	AB	BB	AB	AA	AB
1813	contig_18270	contig_18270_200503	3	68.586	68.586	AB	AB	AA	AB	AB	AB	AB	AB	BB	AB	AB	AB	AA	AA	AA	AB	BB	AB	BB	AA	AA	AB	BB	AB	AA	AA	BB	AA	AA	AA	BB	AB	AB	AB	AB	AA	AB	AB	BB	AB	BB	AB	AA	AB
1814	contig_18270	contig_18270_204654	3	68.586	68.586	AB	AB	AA	AB	AB	AB	AB	AB	BB	AB	AB	AB	AA	AA	AA	AB	BB	AB	BB	AA	AA	AB	BB	AB	AA	AA	BB	AA	AA	AA	BB	AB	AB	AB	AB	AA	AB	AB	BB	AB	BB	AB	AA	AB
1815	contig_18270	contig_18270_220438	3	65.902	65.902	AB	AB	AA	AB	AB	AB	AB	AB	AB	AB	AB	AB	AA	AB	AA	AB	BB	AB	BB	AA	AA	AB	AB	AB	AA	AA	BB	AA	AA	AA	BB	AB	AB	AB	AB	AA	AB	AB	BB	AB	BB	AB	AA	AB
1816	contig_18270	contig_18270_220665	3	65.902	65.902	AB	AB	AA	AB	AB	AB	AB	AB	AB	AB	AB	AB	AA	AB	AA	AB	BB	AB	BB	AA	AA	AB	AB	AB	AA	AA	BB	AA	AA	AA	BB	AB	AB	AB	AB	AA	AB	AB	BB	AB	BB	AB	AA	AB
1817	contig_18270	contig_18270_221607	3	65.902	65.902	AB	AB	AA	AB	AB	AB	AB	AB	AB	AB	AB	AB	AA	AB	AA	AB	BB	AB	BB	AA	AA	AB	AB	AB	AA	AA	BB	AA	AA	AA	BB	AB	AB	AB	AB	AA	AB	AB	BB	AB	BB	AB	AA	AB
1818	contig_18270	contig_18270_228247	3	69.257	69.257	AB	AB	AA	AB	AB	AB	AB	AB	BB	AB	AB	AB	AA	AA	AA	AB	BB	AB	BB	AA	AA	AB	BB	AB	AA	AA	BB	AA	AB	AA	BB	AB	AB	AB	AB	AA	AB	AB	BB	AB	BB	AB	AA	AB
1819	contig_18270	contig_18270_228273	3	65.902	65.902	AB	AB	AA	AB	AB	AB	AB	AB	AB	AB	AB	AB	AA	AB	AA	AB	BB	AB	BB	AA	AA	AB	AB	AB	AA	AA	BB	AA	AA	AA	BB	AB	AB	AB	AB	AA	AB	AB	BB	AB	BB	AB	AA	AB
1820	contig_18270	contig_18270_229529	3	65.902	65.902	AB	AB	AA	AB	AB	AB	AB	AB	AB	AB	AB	AB	AA	AB	AA	AB	BB	AB	BB	AA	AA	AB	AB	AB	AA	AA	BB	AA	AA	AA	BB	AB	AB	AB	AB	AA	AB	AB	BB	AB	BB	AB	AA	AB
1821	contig_18270	contig_18270_229541	3	65.902	65.902	AB	AB	AA	AB	AB	AB	AB	AB	AB	AB	AB	AB	AA	AB	AA	AB	BB	AB	BB	AA	AA	AB	AB	AB	AA	AA	BB	AA	AA	AA	BB	AB	AB	AB	AB	AA	AB	AB	BB	AB	BB	AB	AA	AB
1822	contig_18270	contig_18270_231238	3	68.586	68.586	AB	AB	AA	AB	AB	AB	AB	AB	BB	AB	AB	AB	AA	AA	AA	AB	BB	AB	BB	AA	AA	AB	BB	AB	AA	AA	BB	AA	AA	AA	BB	AB	AB	AB	AB	AA	AB	AB	BB	AB	BB	AB	AA	AB
1823	contig_18270	contig_18270_233894	3	68.586	68.586	AB	AB	AA	AB	AB	AB	AB	AB	BB	AB	AB	AB	AA	AA	AA	AB	BB	AB	BB	AA	AA	AB	BB	AB	AA	AA	BB	AA	AA	AA	BB	AB	AB	AB	AB	AA	AB	AB	BB	AB	BB	AB	AA	AB
1824	contig_18270	contig_18270_233950	3	65.902	65.902	AB	AB	AA	AB	AB	AB	AB	AB	AB	AB	AB	AB	AA	AB	AA	AB	BB	AB	BB	AA	AA	AB	AB	AB	AA	AA	BB	AA	AA	AA	BB	AB	AB	AB	AB	AA	AB	AB	BB	AB	BB	AB	AA	AB
1825	contig_18270	contig_18270_234553	3	65.902	65.902	AB	AB	AA	AB	AB	AB	AB	AB	AB	AB	AB	AB	AA	AB	AA	AB	BB	AB	BB	AA	AA	AB	AB	AB	AA	AA	BB	AA	AA	AA	BB	AB	AB	AB	AB	AA	AB	AB	BB	AB	BB	AB	AA	AB
1826	contig_18270	contig_18270_252096	3	68.586	68.586	AB	AB	AA	AB	AB	AB	AB	AB	BB	AB	AB	AB	AA	AA	AA	AB	BB	AB	BB	AA	AA	AB	BB	AB	AA	AA	BB	AA	AA	AA	BB	AB	AB	AB	AB	AA	AB	AB	BB	AB	BB	AB	AA	AB
1827	contig_18270	contig_18270_252211	3	68.586	68.586	AB	AB	AA	AB	AB	AB	AB	AB	BB	AB	AB	AB	AA	AA	AA	AB	BB	AB	BB	AA	AA	AB	BB	AB	AA	AA	BB	AA	AA	AA	BB	AB	AB	AB	AB	AA	AB	AB	BB	AB	BB	AB	AA	AB
1828	contig_18270	contig_18270_253397	3	65.902	65.902	AB	AB	AA	AB	AB	AB	AB	AB	AB	AB	AB	AB	AA	AB	AA	AB	BB	AB	BB	AA	AA	AB	AB	AB	AA	AA	BB	AA	AA	AA	BB	AB	AB	AB	AB	AA	AB	AB	BB	AB	BB	AB	AA	AB
1829	contig_18270	contig_18270_255404	3	68.586	68.586	AB	AB	AA	AB	AB	AB	AB	AB	BB	AB	AB	AB	AA	AA	AA	AB	BB	AB	BB	AA	AA	AB	BB	AB	AA	AA	BB	AA	AA	AA	BB	AB	AB	AB	AB	AA	AB	AB	BB	AB	BB	AB	AA	AB
1830	contig_18270	contig_18270_255412	3	68.586	68.586	AB	AB	AA	AB	AB	AB	AB	AB	BB	AB	AB	AB	AA	AA	AA	AB	BB	AB	BB	AA	AA	AB	BB	AB	AA	AA	BB	AA	AA	AA	BB	AB	AB	AB	AB	AA	AB	AB	BB	AB	BB	AB	AA	AB
1831	contig_18270	contig_18270_255467	3	65.902	65.902	AB	AB	AA	AB	AB	AB	AB	AB	AB	AB	AB	AB	AA	AB	AA	AB	BB	AB	BB	AA	AA	AB	AB	AB	AA	AA	BB	AA	AA	AA	BB	AB	AB	AB	AB	AA	AB	AB	BB	AB	BB	AB	AA	AB
1832	contig_18270	contig_18270_255471	3	65.902	65.902	AB	AB	AA	AB	AB	AB	AB	AB	AB	AB	AB	AB	AA	AB	AA	AB	BB	AB	BB	AA	AA	AB	AB	AB	AA	AA	BB	AA	AA	AA	BB	AB	AB	AB	AB	AA	AB	AB	BB	AB	BB	AB	AA	AB
1833	contig_18270	contig_18270_255497	3	68.586	68.586	AB	AB	AA	AB	AB	AB	AB	AB	BB	AB	AB	AB	AA	AA	AA	AB	BB	AB	BB	AA	AA	AB	BB	AB	AA	AA	BB	AA	AA	AA	BB	AB	AB	AB	AB	AA	AB	AB	BB	AB	BB	AB	AA	AB
1835	contig_18270	contig_18270_283880	3	65.902	65.902	AB	AB	AA	AB	AB	AB	AB	AB	AB	AB	AB	AB	AA	AB	AA	AB	BB	AB	BB	AA	AA	AB	AB	AB	AA	AA	BB	AA	AA	AA	BB	AB	AB	AB	AB	AA	AB	AB	BB	AB	BB	AB	AA	AB
1836	contig_18270	contig_18270_283891	3	65.902	65.902	AB	AB	AA	AB	AB	AB	AB	AB	AB	AB	AB	AB	AA	AB	AA	AB	BB	AB	BB	AA	AA	AB	AB	AB	AA	AA	BB	AA	AA	AA	BB	AB	AB	AB	AB	AA	AB	AB	BB	AB	BB	AB	AA	AB
1837	contig_18270	contig_18270_283909	3	68.586	68.586	AB	AB	AA	AB	AB	AB	AB	AB	BB	AB	AB	AB	AA	AA	AA	AB	BB	AB	BB	AA	AA	AB	BB	AB	AA	AA	BB	AA	AA	AA	BB	AB	AB	AB	AB	AA	AB	AB	BB	AB	BB	AB	AA	AB
1840	contig_18270	contig_18270_284011	3	68.586	68.586	AB	AB	AA	AB	AB	AB	AB	AB	BB	AB	AB	AB	AA	AA	AA	AB	BB	AB	BB	AA	AA	AB	BB	AB	AA	AA	BB	AA	AA	AA	BB	AB	AB	AB	AB	AA	AB	AB	BB	AB	BB	AB	AA	AB
1842	contig_18270	contig_18270_284267	3	68.586	68.586	AB	AB	AA	AB	AB	AB	AB	AB	BB	AB	AB	AB	AA	AA	AA	AB	BB	AB	BB	AA	AA	AB	BB	AB	AA	AA	BB	AA	AA	AA	BB	AB	AB	AB	AB	AA	AB	AB	BB	AB	BB	AB	AA	AB
1843	contig_18270	contig_18270_284458	3	65.902	65.902	AB	AB	AA	AB	AB	AB	AB	AB	AB	AB	AB	AB	AA	AB	AA	AB	BB	AB	BB	AA	AA	AB	AB	AB	AA	AA	BB	AA	AA	AA	BB	AB	AB	AB	AB	AA	AB	AB	BB	AB	BB	AB	AA	AB
1844	contig_18270	contig_18270_284562	3	68.586	68.586	AB	AB	AA	AB	AB	AB	AB	AB	BB	AB	AB	AB	AA	AA	AA	AB	BB	AB	BB	AA	AA	AB	BB	AB	AA	AA	BB	AA	AA	AA	BB	AB	AB	AB	AB	AA	AB	AB	BB	AB	BB	AB	AA	AB
1845	contig_18270	contig_18270_304068	3	68.586	68.586	AB	AB	AA	AB	AB	AB	AB	AB	BB	AB	AB	AB	AA	AA	AA	AB	BB	AB	BB	AA	AA	AB	BB	AB	AA	AA	BB	AA	AA	AA	BB	AB	AB	AB	AB	AA	AB	AB	BB	AB	BB	AB	AA	AB
1846	contig_18270	contig_18270_306195	3	65.902	65.902	AB	AB	AA	AB	AB	AB	AB	AB	AB	AB	AB	AB	AA	AB	AA	AB	BB	AB	BB	AA	AA	AB	AB	AB	AA	AA	BB	AA	AA	AA	BB	AB	AB	AB	AB	AA	AB	AB	BB	AB	BB	AB	AA	AB
1847	contig_18270	contig_18270_312517	3	68.586	68.586	AB	AB	AA	AB	AB	AB	AB	AB	BB	AB	AB	AB	AA	AA	AA	AB	BB	AB	BB	AA	AA	AB	BB	AB	AA	AA	BB	AA	AA	AA	BB	AB	AB	AB	AB	AA	AB	AB	BB	AB	BB	AB	AA	AB
1848	contig_18270	contig_18270_312660	3	68.586	68.586	AB	AB	AA	AB	AB	AB	AB	AB	BB	AB	AB	AB	AA	AA	AA	AB	BB	AB	BB	AA	AA	AB	BB	AB	AA	AA	BB	AA	AA	AA	BB	AB	AB	AB	AB	AA	AB	AB	BB	AB	BB	AB	AA	AB
1849	contig_18270	contig_18270_315306	3	68.586	68.586	AB	AB	AA	AB	AB	AB	AB	AB	BB	AB	AB	AB	AA	AA	AA	AB	BB	AB	BB	AA	AA	AB	BB	AB	AA	AA	BB	AA	AA	AA	BB	AB	AB	AB	AB	AA	AB	AB	BB	AB	BB	AB	AA	AB
1850	contig_18270	contig_18270_318750	3	68.586	68.586	AB	AB	AA	AB	AB	AB	AB	AB	BB	AB	AB	AB	AA	AA	AA	AB	BB	AB	BB	AA	AA	AB	BB	AB	AA	AA	BB	AA	AA	AA	BB	AB	AB	AB	AB	AA	AB	AB	BB	AB	BB	AB	AA	AB
1851	contig_18270	contig_18270_319016	3	68.586	68.586	AB	AB	AA	AB	AB	AB	AB	AB	BB	AB	AB	AB	AA	AA	AA	AB	BB	AB	BB	AA	AA	AB	BB	AB	AA	AA	BB	AA	AA	AA	BB	AB	AB	AB	AB	AA	AB	AB	BB	AB	BB	AB	AA	AB
1852	contig_18270	contig_18270_330707	3	65.902	65.902	AB	AB	AA	AB	AB	AB	AB	AB	AB	AB	AB	AB	AA	AB	AA	AB	BB	AB	BB	AA	AA	AB	AB	AB	AA	AA	BB	AA	AA	AA	BB	AB	AB	AB	AB	AA	AB	AB	BB	AB	BB	AB	AA	AB
1853	contig_18270	contig_18270_330860	3	68.586	68.586	AB	AB	AA	AB	AB	AB	AB	AB	BB	AB	AB	AB	AA	AA	AA	AB	BB	AB	BB	AA	AA	AB	BB	AB	AA	AA	BB	AA	AA	AA	BB	AB	AB	AB	AB	AA	AB	AB	BB	AB	BB	AB	AA	AB
1854	contig_18270	contig_18270_349197	3	68.586	68.586	AB	AB	AA	AB	AB	AB	AB	AB	BB	AB	AB	AB	AA	AA	AA	AB	BB	AB	BB	AA	AA	AB	BB	AB	AA	AA	BB	AA	AA	AA	BB	AB	AB	AB	AB	AA	AB	AB	BB	AB	BB	AB	AA	AB
1855	contig_18270	contig_18270_354455	3	68.586	68.586	AB	AB	AA	AB	AB	AB	AB	AB	BB	AB	AB	AB	AA	AA	AA	AB	BB	AB	BB	AA	AA	AB	BB	AB	AA	AA	BB	AA	AA	AA	BB	AB	AB	AB	AB	AA	AB	AB	BB	AB	BB	AB	AA	AB
1856	contig_18270	contig_18270_354556	3	71.942	71.942	AB	AB	AA	AB	AB	BB	AB	AB	BB	AB	AB	AB	AA	AA	AA	AB	BB	AB	BB	AA	AA	AB	BB	AB	AA	AA	BB	AA	AB	AA	BB	AB	AB	AB	AB	AA	AB	AB	BB	AB	BB	AB	AA	AB
1857	contig_18270	contig_18270_354578	3	65.902	65.902	AB	AB	AA	AB	AB	AB	AB	AB	AB	AB	AB	AB	AA	AB	AA	AB	BB	AB	BB	AA	AA	AB	AB	AB	AA	AA	BB	AA	AA	AA	BB	AB	AB	AB	AB	AA	AB	AB	BB	AB	BB	AB	AA	AB
1858	contig_18270	contig_18270_354705	3	65.902	65.902	AB	AB	AA	AB	AB	AB	AB	AB	AB	AB	AB	AB	AA	AB	AA	AB	BB	AB	BB	AA	AA	AB	AB	AB	AA	AA	BB	AA	AA	AA	BB	AB	AB	AB	AB	AA	AB	AB	BB	AB	BB	AB	AA	AB
1859	contig_18270	contig_18270_354750	3	65.902	65.902	AB	AB	AA	AB	AB	AB	AB	AB	AB	AB	AB	AB	AA	AB	AA	AB	BB	AB	BB	AA	AA	AB	AB	AB	AA	AA	BB	AA	AA	AA	BB	AB	AB	AB	AB	AA	AB	AB	BB	AB	BB	AB	AA	AB
1860	contig_18270	contig_18270_356103	3	65.902	65.902	AB	AB	AA	AB	AB	AB	AB	AB	AB	AB	AB	AB	AA	AB	AA	AB	BB	AB	BB	AA	AA	AB	AB	AB	AA	AA	BB	AA	AA	AA	BB	AB	AB	AB	AB	AA	AB	AB	BB	AB	BB	AB	AA	AB
1861	contig_18270	contig_18270_358634	3	68.586	68.586	AB	AB	AA	AB	AB	AB	AB	AB	BB	AB	AB	AB	AA	AA	AA	AB	BB	AB	BB	AA	AA	AB	BB	AB	AA	AA	BB	AA	AA	AA	BB	AB	AB	AB	AB	AA	AB	AB	BB	AB	BB	AB	AA	AB
1862	contig_18270	contig_18270_358846	3	65.902	65.902	AB	AB	AA	AB	AB	AB	AB	AB	AB	AB	AB	AB	AA	AB	AA	AB	BB	AB	BB	AA	AA	AB	AB	AB	AA	AA	BB	AA	AA	AA	BB	AB	AB	AB	AB	AA	AB	AB	BB	AB	BB	AB	AA	AB
1863	contig_18270	contig_18270_364473	3	65.902	65.902	AB	AB	AA	AB	AB	AB	AB	AB	AB	AB	AB	AB	AA	AB	AA	AB	BB	AB	BB	AA	AA	AB	AB	AB	AA	AA	BB	AA	AA	AA	BB	AB	AB	AB	AB	AA	AB	AB	BB	AB	BB	AB	AA	AB
1864	contig_18270	contig_18270_364492	3	65.902	65.902	AB	AB	AA	AB	AB	AB	AB	AB	AB	AB	AB	AB	AA	AB	AA	AB	BB	AB	BB	AA	AA	AB	AB	AB	AA	AA	BB	AA	AA	AA	BB	AB	AB	AB	AB	AA	AB	AB	BB	AB	BB	AB	AA	AB
1866	contig_18270	contig_18270_366581	3	65.902	65.902	AB	AB	AA	AB	AB	AB	AB	AB	AB	AB	AB	AB	AA	AB	AA	AB	BB	AB	BB	AA	AA	AB	AB	AB	AA	AA	BB	AA	AA	AA	BB	AB	AB	AB	AB	AA	AB	AB	BB	AB	BB	AB	AA	AB
1867	contig_18270	contig_18270_373884	3	65.902	65.902	AB	AB	AA	AB	AB	AB	AB	AB	AB	AB	AB	AB	AA	AB	AA	AB	BB	AB	BB	AA	AA	AB	AB	AB	AA	AA	BB	AA	AA	AA	BB	AB	AB	AB	AB	AA	AB	AB	BB	AB	BB	AB	AA	AB
1868	contig_18270	contig_18270_374927	3	68.586	68.586	AB	AB	AA	AB	AB	AB	AB	AB	BB	AB	AB	AB	AA	AA	AA	AB	BB	AB	BB	AA	AA	AB	BB	AB	AA	AA	BB	AA	AA	AA	BB	AB	AB	AB	AB	AA	AB	AB	BB	AB	BB	AB	AA	AB
1869	contig_18270	contig_18270_377467	3	68.586	68.586	AB	AB	AA	AB	AB	AB	AB	AB	BB	AB	AB	AB	AA	AA	AA	AB	BB	AB	BB	AA	AA	AB	BB	AB	AA	AA	BB	AA	AA	AA	BB	AB	AB	AB	AB	AA	AB	AB	BB	AB	BB	AB	AA	AB
1870	contig_18270	contig_18270_382224	3	65.902	65.902	AB	AB	AA	AB	AB	AB	AB	AB	AB	AB	AB	AB	AA	AB	AA	AB	BB	AB	BB	AA	AA	AB	AB	AB	AA	AA	BB	AA	AA	AA	BB	AB	AB	AB	AB	AA	AB	AB	BB	AB	BB	AB	AA	AB
1871	contig_18270	contig_18270_382552	3	65.902	65.902	AB	AB	AA	AB	AB	AB	AB	AB	AB	AB	AB	AB	AA	AB	AA	AB	BB	AB	BB	AA	AA	AB	AB	AB	AA	AA	BB	AA	AA	AA	BB	AB	AB	AB	AB	AA	AB	AB	BB	AB	BB	AB	AA	AB
1872	contig_18270	contig_18270_382774	3	65.902	65.902	AB	AB	AA	AB	AB	AB	AB	AB	AB	AB	AB	AB	AA	AB	AA	AB	BB	AB	BB	AA	AA	AB	AB	AB	AA	AA	BB	AA	AA	AA	BB	AB	AB	AB	AB	AA	AB	AB	BB	AB	BB	AB	AA	AB
1873	contig_18270	contig_18270_382778	3	65.902	65.902	AB	AB	AA	AB	AB	AB	AB	AB	AB	AB	AB	AB	AA	AB	AA	AB	BB	AB	BB	AA	AA	AB	AB	AB	AA	AA	BB	AA	AA	AA	BB	AB	AB	AB	AB	AA	AB	AB	BB	AB	BB	AB	AA	AB
1874	contig_18270	contig_18270_382818	3	65.902	65.902	AB	AB	AA	AB	AB	AB	AB	AB	AB	AB	AB	AB	AA	AB	AA	AB	BB	AB	BB	AA	AA	AB	AB	AB	AA	AA	BB	AA	AA	AA	BB	AB	AB	AB	AB	AA	AB	AB	BB	AB	BB	AB	AA	AB
1875	contig_18270	contig_18270_382823	3	65.902	65.902	AB	AB	AA	AB	AB	AB	AB	AB	AB	AB	AB	AB	AA	AB	AA	AB	BB	AB	BB	AA	AA	AB	AB	AB	AA	AA	BB	AA	AA	AA	BB	AB	AB	AB	AB	AA	AB	AB	BB	AB	BB	AB	AA	AB
1876	contig_18270	contig_18270_382880	3	68.586	68.586	AB	AB	AA	AB	AB	AB	AB	AB	BB	AB	AB	AB	AA	AA	AA	AB	BB	AB	BB	AA	AA	AB	BB	AB	AA	AA	BB	AA	AA	AA	BB	AB	AB	AB	AB	AA	AB	AB	BB	AB	BB	AB	AA	AB
1877	contig_18270	contig_18270_382889	3	65.902	65.902	AB	AB	AA	AB	AB	AB	AB	AB	AB	AB	AB	AB	AA	AB	AA	AB	BB	AB	BB	AA	AA	AB	AB	AB	AA	AA	BB	AA	AA	AA	BB	AB	AB	AB	AB	AA	AB	AB	BB	AB	BB	AB	AA	AB
1878	contig_18270	contig_18270_382892	3	68.586	68.586	AB	AB	AA	AB	AB	AB	AB	AB	BB	AB	AB	AB	AA	AA	AA	AB	BB	AB	BB	AA	AA	AB	BB	AB	AA	AA	BB	AA	AA	AA	BB	AB	AB	AB	AB	AA	AB	AB	BB	AB	BB	AB	AA	AB
1879	contig_18270	contig_18270_382908	3	68.586	68.586	AB	AB	AA	AB	AB	AB	AB	AB	BB	AB	AB	AB	AA	AA	AA	AB	BB	AB	BB	AA	AA	AB	BB	AB	AA	AA	BB	AA	AA	AA	BB	AB	AB	AB	AB	AA	AB	AB	BB	AB	BB	AB	AA	AB
1880	contig_18270	contig_18270_383001	3	68.586	68.586	AB	AB	AA	AB	AB	AB	AB	AB	BB	AB	AB	AB	AA	AA	AA	AB	BB	AB	BB	AA	AA	AB	BB	AB	AA	AA	BB	AA	AA	AA	BB	AB	AB	AB	AB	AA	AB	AB	BB	AB	BB	AB	AA	AB
1881	contig_18270	contig_18270_383013	3	65.902	65.902	AB	AB	AA	AB	AB	AB	AB	AB	AB	AB	AB	AB	AA	AB	AA	AB	BB	AB	BB	AA	AA	AB	AB	AB	AA	AA	BB	AA	AA	AA	BB	AB	AB	AB	AB	AA	AB	AB	BB	AB	BB	AB	AA	AB
1882	contig_18270	contig_18270_383060	3	65.902	65.902	AB	AB	AA	AB	AB	AB	AB	AB	AB	AB	AB	AB	AA	AB	AA	AB	BB	AB	BB	AA	AA	AB	AB	AB	AA	AA	BB	AA	AA	AA	BB	AB	AB	AB	AB	AA	AB	AB	BB	AB	BB	AB	AA	AB
1883	contig_18270	contig_18270_383083	3	65.902	65.902	AB	AB	AA	AB	AB	AB	AB	AB	AB	AB	AB	AB	AA	AB	AA	AB	BB	AB	BB	AA	AA	AB	AB	AB	AA	AA	BB	AA	AA	AA	BB	AB	AB	AB	AB	AA	AB	AB	BB	AB	BB	AB	AA	AB
1884	contig_18270	contig_18270_383106	3	65.902	65.902	AB	AB	AA	AB	AB	AB	AB	AB	AB	AB	AB	AB	AA	AB	AA	AB	BB	AB	BB	AA	AA	AB	AB	AB	AA	AA	BB	AA	AA	AA	BB	AB	AB	AB	AB	AA	AB	AB	BB	AB	BB	AB	AA	AB
1885	contig_18270	contig_18270_383129	3	65.902	65.902	AB	AB	AA	AB	AB	AB	AB	AB	AB	AB	AB	AB	AA	AB	AA	AB	BB	AB	BB	AA	AA	AB	AB	AB	AA	AA	BB	AA	AA	AA	BB	AB	AB	AB	AB	AA	AB	AB	BB	AB	BB	AB	AA	AB
1886	contig_18270	contig_18270_383192	3	65.902	65.902	AB	AB	AA	AB	AB	AB	AB	AB	AB	AB	AB	AB	AA	AB	AA	AB	BB	AB	BB	AA	AA	AB	AB	AB	AA	AA	BB	AA	AA	AA	BB	AB	AB	AB	AB	AA	AB	AB	BB	AB	BB	AB	AA	AB
1887	contig_18270	contig_18270_407948	3	65.902	65.902	AB	AB	AA	AB	AB	AB	AB	AB	AB	AB	AB	AB	AA	AB	AA	AB	BB	AB	BB	AA	AA	AB	AB	AB	AA	AA	BB	AA	AA	AA	BB	AB	AB	AB	AB	AA	AB	AB	BB	AB	BB	AB	AA	AB
1888	contig_18270	contig_18270_408146	3	65.902	65.902	AB	AB	AA	AB	AB	AB	AB	AB	AB	AB	AB	AB	AA	AB	AA	AB	BB	AB	BB	AA	AA	AB	AB	AB	AA	AA	BB	AA	AA	AA	BB	AB	AB	AB	AB	AA	AB	AB	BB	AB	BB	AB	AA	AB
1889	contig_18270	contig_18270_408239	3	68.586	68.586	AB	AB	AA	AB	AB	AB	AB	AB	BB	AB	AB	AB	AA	AA	AA	AB	BB	AB	BB	AA	AA	AB	BB	AB	AA	AA	BB	AA	AA	AA	BB	AB	AB	AB	AB	AA	AB	AB	BB	AB	BB	AB	AA	AB
1890	contig_18270	contig_18270_413382	3	68.586	68.586	AB	AB	AA	AB	AB	AB	AB	AB	BB	AB	AB	AB	AA	AA	AA	AB	BB	AB	BB	AA	AA	AB	BB	AB	AA	AA	BB	AA	AA	AA	BB	AB	AB	AB	AB	AA	AB	AB	BB	AB	BB	AB	AA	AB
1891	contig_18270	contig_18270_413423	3	68.586	68.586	AB	AB	AA	AB	AB	AB	AB	AB	BB	AB	AB	AB	AA	AA	AA	AB	BB	AB	BB	AA	AA	AB	BB	AB	AA	AA	BB	AA	AA	AA	BB	AB	AB	AB	AB	AA	AB	AB	BB	AB	BB	AB	AA	AB
1892	contig_18270	contig_18270_413518	3	68.586	68.586	AB	AB	AA	AB	AB	AB	AB	AB	BB	AB	AB	AB	AA	AA	AA	AB	BB	AB	BB	AA	AA	AB	BB	AB	AA	AA	BB	AA	AA	AA	BB	AB	AB	AB	AB	AA	AB	AB	BB	AB	BB	AB	AA	AB
1893	contig_18270	contig_18270_413822	3	68.586	68.586	AB	AB	AA	AB	AB	AB	AB	AB	BB	AB	AB	AB	AA	AA	AA	AB	BB	AB	BB	AA	AA	AB	BB	AB	AA	AA	BB	AA	AA	AA	BB	AB	AB	AB	AB	AA	AB	AB	BB	AB	BB	AB	AA	AB
1894	contig_18270	contig_18270_413874	3	65.902	65.902	AB	AB	AA	AB	AB	AB	AB	AB	AB	AB	AB	AB	AA	AB	AA	AB	BB	AB	BB	AA	AA	AB	AB	AB	AA	AA	BB	AA	AA	AA	BB	AB	AB	AB	AB	AA	AB	AB	BB	AB	BB	AB	AA	AB
1895	contig_18270	contig_18270_413877	3	65.902	65.902	AB	AB	AA	AB	AB	AB	AB	AB	AB	AB	AB	AB	AA	AB	AA	AB	BB	AB	BB	AA	AA	AB	AB	AB	AA	AA	BB	AA	AA	AA	BB	AB	AB	AB	AB	AA	AB	AB	BB	AB	BB	AB	AA	AB
1896	contig_18270	contig_18270_413924	3	65.902	65.902	AB	AB	AA	AB	AB	AB	AB	AB	AB	AB	AB	AB	AA	AB	AA	AB	BB	AB	BB	AA	AA	AB	AB	AB	AA	AA	BB	AA	AA	AA	BB	AB	AB	AB	AB	AA	AB	AB	BB	AB	BB	AB	AA	AB
1897	contig_18270	contig_18270_413927	3	65.902	65.902	AB	AB	AA	AB	AB	AB	AB	AB	AB	AB	AB	AB	AA	AB	AA	AB	BB	AB	BB	AA	AA	AB	AB	AB	AA	AA	BB	AA	AA	AA	BB	AB	AB	AB	AB	AA	AB	AB	BB	AB	BB	AB	AA	AB
1898	contig_18270	contig_18270_413974	3	68.586	68.586	AB	AB	AA	AB	AB	AB	AB	AB	BB	AB	AB	AB	AA	AA	AA	AB	BB	AB	BB	AA	AA	AB	BB	AB	AA	AA	BB	AA	AA	AA	BB	AB	AB	AB	AB	AA	AB	AB	BB	AB	BB	AB	AA	AB
1899	contig_18270	contig_18270_414492	3	71.942	71.942	AB	AB	AA	AB	AB	BB	AB	AB	BB	AB	AB	AB	AA	AA	AA	AB	BB	AB	BB	AA	AA	AB	BB	AB	AA	AA	BB	AA	AB	AA	BB	AB	AB	AB	AB	AA	AB	AB	BB	AB	BB	AB	AA	AB
1900	contig_18270	contig_18270_457501	3	68.586	68.586	AB	AB	AA	AB	AB	AB	AB	AB	BB	AB	AB	AB	AA	AA	AA	AB	BB	AB	BB	AA	AA	AB	BB	AB	AA	AA	BB	AA	AA	AA	BB	AB	AB	AB	AB	AA	AB	AB	BB	AB	BB	AB	AA	AB
1901	contig_18270	contig_18270_457507	3	68.586	68.586	AB	AB	AA	AB	AB	AB	AB	AB	BB	AB	AB	AB	AA	AA	AA	AB	BB	AB	BB	AA	AA	AB	BB	AB	AA	AA	BB	AA	AA	AA	BB	AB	AB	AB	AB	AA	AB	AB	BB	AB	BB	AB	AA	AB
1902	contig_18270	contig_18270_471160	3	68.586	68.586	AB	AB	AA	AB	AB	AB	AB	AB	BB	AB	AB	AB	AA	AA	AA	AB	BB	AB	BB	AA	AA	AB	BB	AB	AA	AA	BB	AA	AA	AA	BB	AB	AB	AB	AB	AA	AB	AB	BB	AB	BB	AB	AA	AB
1903	contig_18270	contig_18270_471177	3	68.586	68.586	AB	AB	AA	AB	AB	AB	AB	AB	BB	AB	AB	AB	AA	AA	AA	AB	BB	AB	BB	AA	AA	AB	BB	AB	AA	AA	BB	AA	AA	AA	BB	AB	AB	AB	AB	AA	AB	AB	BB	AB	BB	AB	AA	AB
1904	contig_18270	contig_18270_471204	3	68.586	68.586	AB	AB	AA	AB	AB	AB	AB	AB	BB	AB	AB	AB	AA	AA	AA	AB	BB	AB	BB	AA	AA	AB	BB	AB	AA	AA	BB	AA	AA	AA	BB	AB	AB	AB	AB	AA	AB	AB	BB	AB	BB	AB	AA	AB
1905	contig_18270	contig_18270_473906	3	68.586	68.586	AB	AB	AA	AB	AB	AB	AB	AB	BB	AB	AB	AB	AA	AA	AA	AB	BB	AB	BB	AA	AA	AB	BB	AB	AA	AA	BB	AA	AA	AA	BB	AB	AB	AB	AB	AA	AB	AB	BB	AB	BB	AB	AA	AB
1906	contig_18270	contig_18270_474129	3	65.902	65.902	AB	AB	AA	AB	AB	AB	AB	AB	AB	AB	AB	AB	AA	AB	AA	AB	BB	AB	BB	AA	AA	AB	AB	AB	AA	AA	BB	AA	AA	AA	BB	AB	AB	AB	AB	AA	AB	AB	BB	AB	BB	AB	AA	AB
1907	contig_18270	contig_18270_474182	3	68.586	68.586	AB	AB	AA	AB	AB	AB	AB	AB	BB	AB	AB	AB	AA	AA	AA	AB	BB	AB	BB	AA	AA	AB	BB	AB	AA	AA	BB	AA	AA	AA	BB	AB	AB	AB	AB	AA	AB	AB	BB	AB	BB	AB	AA	AB
1908	contig_18270	contig_18270_474193	3	68.586	68.586	AB	AB	AA	AB	AB	AB	AB	AB	BB	AB	AB	AB	AA	AA	AA	AB	BB	AB	BB	AA	AA	AB	BB	AB	AA	AA	BB	AA	AA	AA	BB	AB	AB	AB	AB	AA	AB	AB	BB	AB	BB	AB	AA	AB
1909	contig_18270	contig_18270_474255	3	65.902	65.902	AB	AB	AA	AB	AB	AB	AB	AB	AB	AB	AB	AB	AA	AB	AA	AB	BB	AB	BB	AA	AA	AB	AB	AB	AA	AA	BB	AA	AA	AA	BB	AB	AB	AB	AB	AA	AB	AB	BB	AB	BB	AB	AA	AB
1910	contig_18270	contig_18270_474365	3	68.586	68.586	AB	AB	AA	AB	AB	AB	AB	AB	BB	AB	AB	AB	AA	AA	AA	AB	BB	AB	BB	AA	AA	AB	BB	AB	AA	AA	BB	AA	AA	AA	BB	AB	AB	AB	AB	AA	AB	AB	BB	AB	BB	AB	AA	AB
1911	contig_18270	contig_18270_474437	3	65.902	65.902	AB	AB	AA	AB	AB	AB	AB	AB	AB	AB	AB	AB	AA	AB	AA	AB	BB	AB	BB	AA	AA	AB	AB	AB	AA	AA	BB	AA	AA	AA	BB	AB	AB	AB	AB	AA	AB	AB	BB	AB	BB	AB	AA	AB
1912	contig_18270	contig_18270_480248	3	65.902	65.902	AB	AB	AA	AB	AB	AB	AB	AB	AB	AB	AB	AB	AA	AB	AA	AB	BB	AB	BB	AA	AA	AB	AB	AB	AA	AA	BB	AA	AA	AA	BB	AB	AB	AB	AB	AA	AB	AB	BB	AB	BB	AB	AA	AB
1913	contig_18270	contig_18270_481043	3	68.586	68.586	AB	AB	AA	AB	AB	AB	AB	AB	BB	AB	AB	AB	AA	AA	AA	AB	BB	AB	BB	AA	AA	AB	BB	AB	AA	AA	BB	AA	AA	AA	BB	AB	AB	AB	AB	AA	AB	AB	BB	AB	BB	AB	AA	AB
1914	contig_18270	contig_18270_481136	3	68.586	68.586	AB	AB	AA	AB	AB	AB	AB	AB	BB	AB	AB	AB	AA	AA	AA	AB	BB	AB	BB	AA	AA	AB	BB	AB	AA	AA	BB	AA	AA	AA	BB	AB	AB	AB	AB	AA	AB	AB	BB	AB	BB	AB	AA	AB
1915	contig_18270	contig_18270_487303	3	65.902	65.902	AB	AB	AA	AB	AB	AB	AB	AB	AB	AB	AB	AB	AA	AB	AA	AB	BB	AB	BB	AA	AA	AB	AB	AB	AA	AA	BB	AA	AA	AA	BB	AB	AB	AB	AB	AA	AB	AB	BB	AB	BB	AB	AA	AB
1916	contig_18270	contig_18270_488685	3	68.586	68.586	AB	AB	AA	AB	AB	AB	AB	AB	BB	AB	AB	AB	AA	AA	AA	AB	BB	AB	BB	AA	AA	AB	BB	AB	AA	AA	BB	AA	AA	AA	BB	AB	AB	AB	AB	AA	AB	AB	BB	AB	BB	AB	AA	AB
1917	contig_18270	contig_18270_489169	3	68.586	68.586	AB	AB	AA	AB	AB	AB	AB	AB	BB	AB	AB	AB	AA	AA	AA	AB	BB	AB	BB	AA	AA	AB	BB	AB	AA	AA	BB	AA	AA	AA	BB	AB	AB	AB	AB	AA	AB	AB	BB	AB	BB	AB	AA	AB
1918	contig_18270	contig_18270_489174	3	65.902	65.902	AB	AB	AA	AB	AB	AB	AB	AB	AB	AB	AB	AB	AA	AB	AA	AB	BB	AB	BB	AA	AA	AB	AB	AB	AA	AA	BB	AA	AA	AA	BB	AB	AB	AB	AB	AA	AB	AB	BB	AB	BB	AB	AA	AB
1919	contig_18270	contig_18270_489177	3	65.902	65.902	AB	AB	AA	AB	AB	AB	AB	AB	AB	AB	AB	AB	AA	AB	AA	AB	BB	AB	BB	AA	AA	AB	AB	AB	AA	AA	BB	AA	AA	AA	BB	AB	AB	AB	AB	AA	AB	AB	BB	AB	BB	AB	AA	AB
1920	contig_18270	contig_18270_494456	3	65.902	65.902	AB	AB	AA	AB	AB	AB	AB	AB	AB	AB	AB	AB	AA	AB	AA	AB	BB	AB	BB	AA	AA	AB	AB	AB	AA	AA	BB	AA	AA	AA	BB	AB	AB	AB	AB	AA	AB	AB	BB	AB	BB	AB	AA	AB
1922	contig_18270	contig_18270_506657	3	65.902	65.902	AB	AB	AA	AB	AB	AB	AB	AB	AB	AB	AB	AB	AA	AB	AA	AB	BB	AB	BB	AA	AA	AB	AB	AB	AA	AA	BB	AA	AA	AA	BB	AB	AB	AB	AB	AA	AB	AB	BB	AB	BB	AB	AA	AB
1923	contig_18270	contig_18270_507956	3	65.902	65.902	AB	AB	AA	AB	AB	AB	AB	AB	AB	AB	AB	AB	AA	AB	AA	AB	BB	AB	BB	AA	AA	AB	AB	AB	AA	AA	BB	AA	AA	AA	BB	AB	AB	AB	AB	AA	AB	AB	BB	AB	BB	AB	AA	AB
1924	contig_18270	contig_18270_557206	3	68.586	68.586	AB	AB	AA	AB	AB	AB	AB	AB	BB	AB	AB	AB	AA	AA	AA	AB	BB	AB	BB	AA	AA	AB	BB	AB	AA	AA	BB	AA	AA	AA	BB	AB	AB	AB	AB	AA	AB	AB	BB	AB	BB	AB	AA	AB
1925	contig_18270	contig_18270_562459	3	68.586	68.586	AB	AB	AA	AB	AB	AB	AB	AB	BB	AB	AB	AB	AA	AA	AA	AB	BB	AB	BB	AA	AA	AB	BB	AB	AA	AA	BB	AA	AA	AA	BB	AB	AB	AB	AB	AA	AB	AB	BB	AB	BB	AB	AA	AB
1926	contig_18270	contig_18270_562573	3	65.902	65.902	AB	AB	AA	AB	AB	AB	AB	AB	AB	AB	AB	AB	AA	AB	AA	AB	BB	AB	BB	AA	AA	AB	AB	AB	AA	AA	BB	AA	AA	AA	BB	AB	AB	AB	AB	AA	AB	AB	BB	AB	BB	AB	AA	AB
1927	contig_18270	contig_18270_571056	3	65.902	65.902	AB	AB	AA	AB	AB	AB	AB	AB	AB	AB	AB	AB	AA	AB	AA	AB	BB	AB	BB	AA	AA	AB	AB	AB	AA	AA	BB	AA	AA	AA	BB	AB	AB	AB	AB	AA	AB	AB	BB	AB	BB	AB	AA	AB
2007	ctg47154	ctg47154_1202	2	64.154	64.154	AB	AB	BB	AB	BB	AB	AB	AA	AB	AB	BB	AB	BB	AA	AB	BB	AB	AB	BB	AB	BB	AB	AB	AB	AB	AA	AB	AA	AB	AB	BB	AB	BB	AA	AB	AA	AA	AB	AA	AB	BB	AA	BB	AB
2011	ctg14085	ctg14085_28192	10	42.353	42.353	AB	AB	AB	BB	AB	AA	AB	AB	AB	BB	AB	AB	AB	BB	AA	AA	AB	AB	AB	AB	AB	AA	AB	AB	AA	BB	AB	AB	AB	AA	AA	AB	AA	AB	AB	BB	AB	AB	AB	AB	BB	BB	AA	AA
2012	ctg14085	ctg14085_28300	10	39.668	39.668	AB	AB	AB	BB	AB	AA	AB	AB	AB	BB	AB	AB	AB	BB	AA	AA	AB	AB	AB	AB	AB	AA	AB	AB	AA	BB	AB	AB	AB	AA	AA	AB	AA	AA	AB	BB	AB	AB	AB	AB	BB	BB	AA	AA
2013	ctg14085	ctg14085_38552	10	42.353	42.353	AB	AB	AB	BB	AB	AA	AB	AB	AB	BB	AB	AB	AB	BB	AA	AA	AB	AB	AB	AB	AB	AA	AB	AB	AA	BB	AB	AB	AB	AA	AA	AB	AA	AB	AB	BB	AB	AB	AB	AB	BB	BB	AA	AA
2014	ctg14085	ctg14085_40893	10	35.641	35.641	AB	AB	AB	BB	AB	AA	AB	AB	AB	BB	AB	AB	AB	BB	AA	AA	AB	AB	AB	AB	AB	AA	AB	AB	AA	BB	AB	AB	AB	AA	AA	AB	AA	AB	AB	BB	AB	AB	AB	AB	BB	BB	AA	AA
2016	ctg14080	ctg14080_11845	5	49.208	49.208	AB	AB	AB	BB	AB	AB	AA	AA	BB	AB	AB	AB	AB	AB	BB	AA	AA	AB	AB	AA	AA	AB	BB	AB	BB	AB	AB	AB	AB	BB	BB	BB	BB	AB	BB	AB	BB	AB	AB	AB	AB	AB	AA	BB
2017	ctg14080	ctg14080_11923	5	48.537	48.537	AB	AB	AB	BB	AB	AB	AA	AA	BB	AB	AB	AB	AB	AB	BB	AA	AA	AB	AB	AA	AA	AB	BB	AB	BB	AB	AB	AB	AB	BB	BB	BB	BB	AB	BB	AB	BB	AB	AB	AB	AB	AB	AA	BB
2018	ctg14080	ctg14080_48834	5	48.537	48.537	AB	AB	AB	BB	AB	AB	AA	AA	BB	AB	AB	AB	AB	AB	BB	AA	AA	AB	AB	AA	AA	AB	BB	AB	BB	AB	AB	AB	AB	BB	BB	BB	BB	AB	BB	AB	BB	AB	AB	AB	AB	AB	AA	BB
2019	ctg14080	ctg14080_48932	5	48.537	48.537	AB	AB	AB	BB	AB	AB	AA	AA	BB	AB	AB	AB	AB	AB	BB	AA	AA	AB	AB	AA	AA	AB	BB	AB	BB	AB	AB	AB	AB	BB	BB	BB	BB	AB	BB	AB	BB	AB	AB	AB	AB	AB	AA	BB
2020	ctg14080	ctg14080_48937	5	48.537	48.537	AB	AB	AB	BB	AB	AB	AA	AA	BB	AB	AB	AB	AB	AB	BB	AA	AA	AB	AB	AA	AA	AB	BB	AB	BB	AB	AB	AB	AB	BB	BB	BB	BB	AB	BB	AB	BB	AB	AB	AB	AB	AB	AA	BB
2021	ctg14080	ctg14080_48941	5	48.537	48.537	AB	AB	AB	BB	AB	AB	AA	AA	BB	AB	AB	AB	AB	AB	BB	AA	AA	AB	AB	AA	AA	AB	BB	AB	BB	AB	AB	AB	AB	BB	BB	BB	BB	AB	BB	AB	BB	AB	AB	AB	AB	AB	AA	BB
2022	ctg14080	ctg14080_50902	5	48.537	48.537	AB	AB	AB	BB	AB	AB	AA	AA	BB	AB	AB	AB	AB	AB	BB	AA	AA	AB	AB	AA	AA	AB	BB	AB	BB	AB	AB	AB	AB	BB	BB	BB	BB	AB	BB	AB	BB	AB	AB	AB	AB	AB	AA	BB
2023	ctg14080	ctg14080_50960	5	49.879	49.879	AB	AB	AB	BB	AB	AB	AA	AA	BB	AB	AB	AB	AB	AB	BB	AA	AA	AB	AB	AA	AA	AB	BB	AB	BB	AB	AB	AB	AB	BB	BB	BB	BB	AB	BB	AB	BB	AB	AB	AB	AB	AB	AA	BB
2024	ctg14080	ctg14080_51105	5	48.537	48.537	AB	AB	AB	BB	AB	AB	AA	AA	BB	AB	AB	AB	AB	AB	BB	AA	AA	AB	AB	AA	AA	AB	BB	AB	BB	AB	AB	AB	AB	BB	BB	BB	BB	AB	BB	AB	BB	AB	AB	AB	AB	AB	AA	BB
2025	ctg14080	ctg14080_51106	5	49.879	49.879	AB	AB	AB	BB	AB	AB	AA	AA	BB	AB	AB	AB	AB	AB	BB	AA	AA	AB	AB	AA	AA	AB	BB	AB	BB	AB	AB	AB	AB	BB	BB	BB	BB	AB	BB	AB	BB	AB	AB	AB	AB	AB	AA	BB
2026	ctg14080	ctg14080_51111	5	48.537	48.537	AB	AB	AB	BB	AB	AB	AA	AA	BB	AB	AB	AB	AB	AB	BB	AA	AA	AB	AB	AA	AA	AB	BB	AB	BB	AB	AB	AB	AB	BB	BB	BB	BB	AB	BB	AB	BB	AB	AB	AB	AB	AB	AA	BB
2027	ctg14080	ctg14080_51215	5	49.879	49.879	AB	AB	AB	BB	AB	AB	AA	AA	BB	AB	AB	AB	AB	AB	BB	AA	AA	AB	AB	AA	AA	AB	BB	AB	BB	AB	AB	AB	AB	BB	BB	BB	BB	AB	BB	AB	BB	AB	AB	AB	AB	AB	AA	BB
2028	ctg14080	ctg14080_51218	5	49.879	49.879	AB	AB	AB	BB	AB	AB	AA	AA	BB	AB	AB	AB	AB	AB	BB	AA	AA	AB	AB	AA	AA	AB	BB	AB	BB	AB	AB	AB	AB	BB	BB	BB	BB	AB	BB	AB	BB	AB	AB	AB	AB	AB	AA	BB
2029	ctg14083	ctg14083_36187	1	56.321	56.321	AB	AB	AB	AA	AB	BB	BB	AB	BB	AB	AA	AB	AB	BB	AA	AB	AB	AB	BB	AB	AA	AB	AB	BB	BB	BB	AB	BB	AA	AB	AB	AB	AB	BB	BB	AB	AA	AB	BB	AB	BB	AB	BB	BB
2030	ctg14083	ctg14083_36576	1	137.282	137.282	AB	AB	AA	BB	AB	AB	AB	AA	AB	AB	AA	AB	AA	AB	AA	AB	AB	AA	AB	AA	AA	AB	AB	AB	AB	AB	AA	AB	AA	BB	BB	AA	AA	AB	AB	AA	BB	AA	AB	AA	AB	AB	AB	AB
2031	ctg14083	ctg14083_75157	1	137.282	137.282	AB	AB	AA	BB	AB	AB	AB	AA	AB	AB	AA	AB	AA	AB	AA	AB	AB	AA	AB	AA	AA	AB	AB	AB	AB	AB	AA	AB	AA	BB	BB	AA	AA	AB	AB	AA	BB	AA	AB	AA	AB	AB	AB	AB
2032	ctg14083	ctg14083_75198	1	137.282	137.282	AB	AB	AA	BB	AB	AB	AB	AA	AB	AB	AA	AB	AA	AB	AA	AB	AB	AA	AB	AA	AA	AB	AB	AB	AB	AB	AA	AB	AA	BB	BB	AA	AA	AB	AB	AA	BB	AA	AB	AA	AB	AB	AB	AB
2034	tig00396557	tig00396557_165475	3	18.222	18.222	AB	AB	AB	AB	AB	AA	AB	AB	AB	AA	AB	AB	AA	BB	AA	AA	AB	AA	BB	AB	AA	AB	BB	BB	BB	AB	BB	BB	AA	AB	AB	AB	AA	AB	AA	BB	AB	AB	BB	AA	AB	BB	AA	BB
2184	tig00001690	tig00001690_23771	5	33.1	33.1	AB	AB	AA	BB	AB	BB	AA	AB	BB	AB	AB	AB	AB	AB	BB	AA	AA	AA	AB	AA	AA	AB	AB	AB	AB	BB	AB	BB	AB	BB	BB	BB	AB	AB	BB	AB	BB	AB	AB	AB	AA	AA	AA	AB
2185	tig00001690	tig00001690_25181	5	32.429	32.429	AB	AB	AA	BB	AB	BB	AA	AB	BB	AB	AB	AB	AB	AB	BB	AA	AA	AA	AB	AA	AA	AB	AB	AB	AB	BB	AB	BB	AB	BB	BB	BB	AB	AB	BB	AB	BB	AB	AB	AB	AA	AA	AA	AB
2186	tig00001690	tig00001690_27927	5	33.1	33.1	AB	AB	AA	BB	AB	BB	AA	AB	BB	AB	AB	AB	AB	AB	BB	AA	AA	AA	AB	AA	AA	AB	AB	AB	AB	BB	AB	BB	AB	BB	BB	BB	AB	AB	BB	AB	BB	AB	AB	AB	AA	AA	AA	AB
2187	tig00001690	tig00001690_28017	5	33.1	33.1	AB	AB	AA	BB	AB	BB	AA	AB	BB	AB	AB	AB	AB	AB	BB	AA	AA	AA	AB	AA	AA	AB	AB	AB	AB	BB	AB	BB	AB	BB	BB	BB	AB	AB	BB	AB	BB	AB	AB	AB	AA	AA	AA	AB
2188	tig00001690	tig00001690_28032	5	33.1	33.1	AB	AB	AA	BB	AB	BB	AA	AB	BB	AB	AB	AB	AB	AB	BB	AA	AA	AA	AB	AA	AA	AB	AB	AB	AB	BB	AB	BB	AB	BB	BB	BB	AB	AB	BB	AB	BB	AB	AB	AB	AA	AA	AA	AB
2189	tig00001690	tig00001690_31870	5	33.1	33.1	AB	AB	AA	BB	AB	BB	AA	AB	BB	AB	AB	AB	AB	AB	BB	AA	AA	AA	AB	AA	AA	AB	AB	AB	AB	BB	AB	BB	AB	BB	BB	BB	AB	AB	BB	AB	BB	AB	AB	AB	AA	AA	AA	AB
2190	tig00001690	tig00001690_34275	5	33.1	33.1	AB	AB	AA	BB	AB	BB	AA	AB	BB	AB	AB	AB	AB	AB	BB	AA	AA	AA	AB	AA	AA	AB	AB	AB	AB	BB	AB	BB	AB	BB	BB	BB	AB	AB	BB	AB	BB	AB	AB	AB	AA	AA	AA	AB
2191	tig00001690	tig00001690_37451	5	33.1	33.1	AB	AB	AA	BB	AB	BB	AA	AB	BB	AB	AB	AB	AB	AB	BB	AA	AA	AA	AB	AA	AA	AB	AB	AB	AB	BB	AB	BB	AB	BB	BB	BB	AB	AB	BB	AB	BB	AB	AB	AB	AA	AA	AA	AB
2192	tig00001690	tig00001690_52606	5	33.1	33.1	AB	AB	AA	BB	AB	BB	AA	AB	BB	AB	AB	AB	AB	AB	BB	AA	AA	AA	AB	AA	AA	AB	AB	AB	AB	BB	AB	BB	AB	BB	BB	BB	AB	AB	BB	AB	BB	AB	AB	AB	AA	AA	AA	AB
2193	tig00001690	tig00001690_53966	5	33.1	33.1	AB	AB	AA	BB	AB	BB	AA	AB	BB	AB	AB	AB	AB	AB	BB	AA	AA	AA	AB	AA	AA	AB	AB	AB	AB	BB	AB	BB	AB	BB	BB	BB	AB	AB	BB	AB	BB	AB	AB	AB	AA	AA	AA	AB
2194	tig00001690	tig00001690_56073	5	32.429	32.429	AB	AB	AA	BB	AB	BB	AA	AB	BB	AB	AB	AB	AB	AB	BB	AA	AA	AA	AB	AA	AA	AB	AB	AB	AB	BB	AB	BB	AB	BB	BB	BB	AB	AB	BB	AB	BB	AB	AB	AB	AA	AA	AA	AB
2195	tig00001690	tig00001690_56165	5	33.1	33.1	AB	AB	AA	BB	AB	BB	AA	AB	BB	AB	AB	AB	AB	AB	BB	AA	AA	AA	AB	AA	AA	AB	AB	AB	AB	BB	AB	BB	AB	BB	BB	BB	AB	AB	BB	AB	BB	AB	AB	AB	AA	AA	AA	AB
2196	tig00001690	tig00001690_56180	5	33.1	33.1	AB	AB	AA	BB	AB	BB	AA	AB	BB	AB	AB	AB	AB	AB	BB	AA	AA	AA	AB	AA	AA	AB	AB	AB	AB	BB	AB	BB	AB	BB	BB	BB	AB	AB	BB	AB	BB	AB	AB	AB	AA	AA	AA	AB
2197	tig00001690	tig00001690_56195	5	33.1	33.1	AB	AB	AA	BB	AB	BB	AA	AB	BB	AB	AB	AB	AB	AB	BB	AA	AA	AA	AB	AA	AA	AB	AB	AB	AB	BB	AB	BB	AB	BB	BB	BB	AB	AB	BB	AB	BB	AB	AB	AB	AA	AA	AA	AB
2198	tig00001690	tig00001690_56216	5	33.1	33.1	AB	AB	AA	BB	AB	BB	AA	AB	BB	AB	AB	AB	AB	AB	BB	AA	AA	AA	AB	AA	AA	AB	AB	AB	AB	BB	AB	BB	AB	BB	BB	BB	AB	AB	BB	AB	BB	AB	AB	AB	AA	AA	AA	AB
2199	tig00001690	tig00001690_56224	5	33.1	33.1	AB	AB	AA	BB	AB	BB	AA	AB	BB	AB	AB	AB	AB	AB	BB	AA	AA	AA	AB	AA	AA	AB	AB	AB	AB	BB	AB	BB	AB	BB	BB	BB	AB	AB	BB	AB	BB	AB	AB	AB	AA	AA	AA	AB
2200	tig00001690	tig00001690_56255	5	33.1	33.1	AB	AB	AA	BB	AB	BB	AA	AB	BB	AB	AB	AB	AB	AB	BB	AA	AA	AA	AB	AA	AA	AB	AB	AB	AB	BB	AB	BB	AB	BB	BB	BB	AB	AB	BB	AB	BB	AB	AB	AB	AA	AA	AA	AB
2201	tig00001690	tig00001690_56259	5	33.1	33.1	AB	AB	AA	BB	AB	BB	AA	AB	BB	AB	AB	AB	AB	AB	BB	AA	AA	AA	AB	AA	AA	AB	AB	AB	AB	BB	AB	BB	AB	BB	BB	BB	AB	AB	BB	AB	BB	AB	AB	AB	AA	AA	AA	AB
2202	tig00001690	tig00001690_56276	5	33.1	33.1	AB	AB	AA	BB	AB	BB	AA	AB	BB	AB	AB	AB	AB	AB	BB	AA	AA	AA	AB	AA	AA	AB	AB	AB	AB	BB	AB	BB	AB	BB	BB	BB	AB	AB	BB	AB	BB	AB	AB	AB	AA	AA	AA	AB
2203	tig00001690	tig00001690_56277	5	33.1	33.1	AB	AB	AA	BB	AB	BB	AA	AB	BB	AB	AB	AB	AB	AB	BB	AA	AA	AA	AB	AA	AA	AB	AB	AB	AB	BB	AB	BB	AB	BB	BB	BB	AB	AB	BB	AB	BB	AB	AB	AB	AA	AA	AA	AB
2204	tig00001690	tig00001690_56301	5	33.1	33.1	AB	AB	AA	BB	AB	BB	AA	AB	BB	AB	AB	AB	AB	AB	BB	AA	AA	AA	AB	AA	AA	AB	AB	AB	AB	BB	AB	BB	AB	BB	BB	BB	AB	AB	BB	AB	BB	AB	AB	AB	AA	AA	AA	AB
2205	tig00001690	tig00001690_62643	5	33.1	33.1	AB	AB	AA	BB	AB	BB	AA	AB	BB	AB	AB	AB	AB	AB	BB	AA	AA	AA	AB	AA	AA	AB	AB	AB	AB	BB	AB	BB	AB	BB	BB	BB	AB	AB	BB	AB	BB	AB	AB	AB	AA	AA	AA	AB
2206	tig00001690	tig00001690_62782	5	33.1	33.1	AB	AB	AA	BB	AB	BB	AA	AB	BB	AB	AB	AB	AB	AB	BB	AA	AA	AA	AB	AA	AA	AB	AB	AB	AB	BB	AB	BB	AB	BB	BB	BB	AB	AB	BB	AB	BB	AB	AB	AB	AA	AA	AA	AB
2207	tig00001690	tig00001690_63874	5	32.429	32.429	AB	AB	AA	BB	AB	BB	AA	AB	BB	AB	AB	AB	AB	AB	BB	AA	AA	AA	AB	AA	AA	AB	AB	AB	AB	BB	AB	BB	AB	BB	BB	BB	AB	AB	BB	AB	BB	AB	AB	AB	AA	AA	AA	AB
2208	tig00001690	tig00001690_67680	5	33.1	33.1	AB	AB	AA	BB	AB	BB	AA	AB	BB	AB	AB	AB	AB	AB	BB	AA	AA	AA	AB	AA	AA	AB	AB	AB	AB	BB	AB	BB	AB	BB	BB	BB	AB	AB	BB	AB	BB	AB	AB	AB	AA	AA	AA	AB
2209	tig00001690	tig00001690_68918	5	33.1	33.1	AB	AB	AA	BB	AB	BB	AA	AB	BB	AB	AB	AB	AB	AB	BB	AA	AA	AA	AB	AA	AA	AB	AB	AB	AB	BB	AB	BB	AB	BB	BB	BB	AB	AB	BB	AB	BB	AB	AB	AB	AA	AA	AA	AB
2212	tig00001690	tig00001690_69094	5	33.1	33.1	AB	AB	AA	BB	AB	BB	AA	AB	BB	AB	AB	AB	AB	AB	BB	AA	AA	AA	AB	AA	AA	AB	AB	AB	AB	BB	AB	BB	AB	BB	BB	BB	AB	AB	BB	AB	BB	AB	AB	AB	AA	AA	AA	AB
2213	tig00001690	tig00001690_69096	5	33.1	33.1	AB	AB	AA	BB	AB	BB	AA	AB	BB	AB	AB	AB	AB	AB	BB	AA	AA	AA	AB	AA	AA	AB	AB	AB	AB	BB	AB	BB	AB	BB	BB	BB	AB	AB	BB	AB	BB	AB	AB	AB	AA	AA	AA	AB
2214	tig00001690	tig00001690_72580	5	33.1	33.1	AB	AB	AA	BB	AB	BB	AA	AB	BB	AB	AB	AB	AB	AB	BB	AA	AA	AA	AB	AA	AA	AB	AB	AB	AB	BB	AB	BB	AB	BB	BB	BB	AB	AB	BB	AB	BB	AB	AB	AB	AA	AA	AA	AB
2215	tig00001690	tig00001690_72583	5	33.1	33.1	AB	AB	AA	BB	AB	BB	AA	AB	BB	AB	AB	AB	AB	AB	BB	AA	AA	AA	AB	AA	AA	AB	AB	AB	AB	BB	AB	BB	AB	BB	BB	BB	AB	AB	BB	AB	BB	AB	AB	AB	AA	AA	AA	AB
2216	tig00001690	tig00001690_72584	5	33.1	33.1	AB	AB	AA	BB	AB	BB	AA	AB	BB	AB	AB	AB	AB	AB	BB	AA	AA	AA	AB	AA	AA	AB	AB	AB	AB	BB	AB	BB	AB	BB	BB	BB	AB	AB	BB	AB	BB	AB	AB	AB	AA	AA	AA	AB
2217	tig00001690	tig00001690_72589	5	33.1	33.1	AB	AB	AA	BB	AB	BB	AA	AB	BB	AB	AB	AB	AB	AB	BB	AA	AA	AA	AB	AA	AA	AB	AB	AB	AB	BB	AB	BB	AB	BB	BB	BB	AB	AB	BB	AB	BB	AB	AB	AB	AA	AA	AA	AB
2218	tig00001690	tig00001690_72622	5	33.1	33.1	AB	AB	AA	BB	AB	BB	AA	AB	BB	AB	AB	AB	AB	AB	BB	AA	AA	AA	AB	AA	AA	AB	AB	AB	AB	BB	AB	BB	AB	BB	BB	BB	AB	AB	BB	AB	BB	AB	AB	AB	AA	AA	AA	AB
2219	tig00001690	tig00001690_83385	5	33.1	33.1	AB	AB	AA	BB	AB	BB	AA	AB	BB	AB	AB	AB	AB	AB	BB	AA	AA	AA	AB	AA	AA	AB	AB	AB	AB	BB	AB	BB	AB	BB	BB	BB	AB	AB	BB	AB	BB	AB	AB	AB	AA	AA	AA	AB
2220	tig00001690	tig00001690_83443	5	33.1	33.1	AB	AB	AA	BB	AB	BB	AA	AB	BB	AB	AB	AB	AB	AB	BB	AA	AA	AA	AB	AA	AA	AB	AB	AB	AB	BB	AB	BB	AB	BB	BB	BB	AB	AB	BB	AB	BB	AB	AB	AB	AA	AA	AA	AB
2221	tig00001690	tig00001690_83459	5	33.1	33.1	AB	AB	AA	BB	AB	BB	AA	AB	BB	AB	AB	AB	AB	AB	BB	AA	AA	AA	AB	AA	AA	AB	AB	AB	AB	BB	AB	BB	AB	BB	BB	BB	AB	AB	BB	AB	BB	AB	AB	AB	AA	AA	AA	AB
2222	tig00001690	tig00001690_85044	5	33.1	33.1	AB	AB	AA	BB	AB	BB	AA	AB	BB	AB	AB	AB	AB	AB	BB	AA	AA	AA	AB	AA	AA	AB	AB	AB	AB	BB	AB	BB	AB	BB	BB	BB	AB	AB	BB	AB	BB	AB	AB	AB	AA	AA	AA	AB
2223	tig00001690	tig00001690_98062	5	33.1	33.1	AB	AB	AA	BB	AB	BB	AA	AB	BB	AB	AB	AB	AB	AB	BB	AA	AA	AA	AB	AA	AA	AB	AB	AB	AB	BB	AB	BB	AB	BB	BB	BB	AB	AB	BB	AB	BB	AB	AB	AB	AA	AA	AA	AB
2224	tig00001690	tig00001690_98063	5	33.1	33.1	AB	AB	AA	BB	AB	BB	AA	AB	BB	AB	AB	AB	AB	AB	BB	AA	AA	AA	AB	AA	AA	AB	AB	AB	AB	BB	AB	BB	AB	BB	BB	BB	AB	AB	BB	AB	BB	AB	AB	AB	AA	AA	AA	AB
2225	tig00001690	tig00001690_98066	5	33.1	33.1	AB	AB	AA	BB	AB	BB	AA	AB	BB	AB	AB	AB	AB	AB	BB	AA	AA	AA	AB	AA	AA	AB	AB	AB	AB	BB	AB	BB	AB	BB	BB	BB	AB	AB	BB	AB	BB	AB	AB	AB	AA	AA	AA	AB
2226	tig00001690	tig00001690_98074	5	33.1	33.1	AB	AB	AA	BB	AB	BB	AA	AB	BB	AB	AB	AB	AB	AB	BB	AA	AA	AA	AB	AA	AA	AB	AB	AB	AB	BB	AB	BB	AB	BB	BB	BB	AB	AB	BB	AB	BB	AB	AB	AB	AA	AA	AA	AB
2227	tig00001690	tig00001690_98093	5	33.1	33.1	AB	AB	AA	BB	AB	BB	AA	AB	BB	AB	AB	AB	AB	AB	BB	AA	AA	AA	AB	AA	AA	AB	AB	AB	AB	BB	AB	BB	AB	BB	BB	BB	AB	AB	BB	AB	BB	AB	AB	AB	AA	AA	AA	AB
2228	tig00001690	tig00001690_98097	5	33.1	33.1	AB	AB	AA	BB	AB	BB	AA	AB	BB	AB	AB	AB	AB	AB	BB	AA	AA	AA	AB	AA	AA	AB	AB	AB	AB	BB	AB	BB	AB	BB	BB	BB	AB	AB	BB	AB	BB	AB	AB	AB	AA	AA	AA	AB
2229	tig00001690	tig00001690_107172	5	33.1	33.1	AB	AB	AA	BB	AB	BB	AA	AB	BB	AB	AB	AB	AB	AB	BB	AA	AA	AA	AB	AA	AA	AB	AB	AB	AB	BB	AB	BB	AB	BB	BB	BB	AB	AB	BB	AB	BB	AB	AB	AB	AA	AA	AA	AB
2230	tig00001690	tig00001690_119425	5	33.1	33.1	AB	AB	AA	BB	AB	BB	AA	AB	BB	AB	AB	AB	AB	AB	BB	AA	AA	AA	AB	AA	AA	AB	AB	AB	AB	BB	AB	BB	AB	BB	BB	BB	AB	AB	BB	AB	BB	AB	AB	AB	AA	AA	AA	AB
2231	tig00001690	tig00001690_119435	5	33.1	33.1	AB	AB	AA	BB	AB	BB	AA	AB	BB	AB	AB	AB	AB	AB	BB	AA	AA	AA	AB	AA	AA	AB	AB	AB	AB	BB	AB	BB	AB	BB	BB	BB	AB	AB	BB	AB	BB	AB	AB	AB	AA	AA	AA	AB
2232	tig00001690	tig00001690_119495	5	32.429	32.429	AB	AB	AA	BB	AB	BB	AA	AB	BB	AB	AB	AB	AB	AB	BB	AA	AA	AA	AB	AA	AA	AB	AB	AB	AB	BB	AB	BB	AB	BB	BB	BB	AB	AB	BB	AB	BB	AB	AB	AB	AA	AA	AA	AB
2233	tig00001690	tig00001690_119530	5	33.1	33.1	AB	AB	AA	BB	AB	BB	AA	AB	BB	AB	AB	AB	AB	AB	BB	AA	AA	AA	AB	AA	AA	AB	AB	AB	AB	BB	AB	BB	AB	BB	BB	BB	AB	AB	BB	AB	BB	AB	AB	AB	AA	AA	AA	AB
2234	tig00001690	tig00001690_124361	5	33.1	33.1	AB	AB	AA	BB	AB	BB	AA	AB	BB	AB	AB	AB	AB	AB	BB	AA	AA	AA	AB	AA	AA	AB	AB	AB	AB	BB	AB	BB	AB	BB	BB	BB	AB	AB	BB	AB	BB	AB	AB	AB	AA	AA	AA	AB
2235	tig00001690	tig00001690_124432	5	33.1	33.1	AB	AB	AA	BB	AB	BB	AA	AB	BB	AB	AB	AB	AB	AB	BB	AA	AA	AA	AB	AA	AA	AB	AB	AB	AB	BB	AB	BB	AB	BB	BB	BB	AB	AB	BB	AB	BB	AB	AB	AB	AA	AA	AA	AB
2236	tig00001690	tig00001690_125000	5	33.1	33.1	AB	AB	AA	BB	AB	BB	AA	AB	BB	AB	AB	AB	AB	AB	BB	AA	AA	AA	AB	AA	AA	AB	AB	AB	AB	BB	AB	BB	AB	BB	BB	BB	AB	AB	BB	AB	BB	AB	AB	AB	AA	AA	AA	AB
2237	tig00001690	tig00001690_125053	5	33.1	33.1	AB	AB	AA	BB	AB	BB	AA	AB	BB	AB	AB	AB	AB	AB	BB	AA	AA	AA	AB	AA	AA	AB	AB	AB	AB	BB	AB	BB	AB	BB	BB	BB	AB	AB	BB	AB	BB	AB	AB	AB	AA	AA	AA	AB
2238	tig00001690	tig00001690_125064	5	33.1	33.1	AB	AB	AA	BB	AB	BB	AA	AB	BB	AB	AB	AB	AB	AB	BB	AA	AA	AA	AB	AA	AA	AB	AB	AB	AB	BB	AB	BB	AB	BB	BB	BB	AB	AB	BB	AB	BB	AB	AB	AB	AA	AA	AA	AB
2239	tig00001690	tig00001690_125072	5	33.1	33.1	AB	AB	AA	BB	AB	BB	AA	AB	BB	AB	AB	AB	AB	AB	BB	AA	AA	AA	AB	AA	AA	AB	AB	AB	AB	BB	AB	BB	AB	BB	BB	BB	AB	AB	BB	AB	BB	AB	AB	AB	AA	AA	AA	AB
2240	tig00001690	tig00001690_125402	5	33.1	33.1	AB	AB	AA	BB	AB	BB	AA	AB	BB	AB	AB	AB	AB	AB	BB	AA	AA	AA	AB	AA	AA	AB	AB	AB	AB	BB	AB	BB	AB	BB	BB	BB	AB	AB	BB	AB	BB	AB	AB	AB	AA	AA	AA	AB
2241	tig00001690	tig00001690_128905	5	33.1	33.1	AB	AB	AA	BB	AB	BB	AA	AB	BB	AB	AB	AB	AB	AB	BB	AA	AA	AA	AB	AA	AA	AB	AB	AB	AB	BB	AB	BB	AB	BB	BB	BB	AB	AB	BB	AB	BB	AB	AB	AB	AA	AA	AA	AB
2242	tig00001690	tig00001690_134702	5	32.429	32.429	AB	AB	AA	BB	AB	BB	AA	AB	BB	AB	AB	AB	AB	AB	BB	AA	AA	AA	AB	AA	AA	AB	AB	AB	AB	BB	AB	BB	AB	BB	BB	BB	AB	AB	BB	AB	BB	AB	AB	AB	AA	AA	AA	AB
2243	tig00001690	tig00001690_134896	5	33.1	33.1	AB	AB	AA	BB	AB	BB	AA	AB	BB	AB	AB	AB	AB	AB	BB	AA	AA	AA	AB	AA	AA	AB	AB	AB	AB	BB	AB	BB	AB	BB	BB	BB	AB	AB	BB	AB	BB	AB	AB	AB	AA	AA	AA	AB
2244	tig00001690	tig00001690_135002	5	33.1	33.1	AB	AB	AA	BB	AB	BB	AA	AB	BB	AB	AB	AB	AB	AB	BB	AA	AA	AA	AB	AA	AA	AB	AB	AB	AB	BB	AB	BB	AB	BB	BB	BB	AB	AB	BB	AB	BB	AB	AB	AB	AA	AA	AA	AB
2245	tig00001690	tig00001690_135013	5	33.1	33.1	AB	AB	AA	BB	AB	BB	AA	AB	BB	AB	AB	AB	AB	AB	BB	AA	AA	AA	AB	AA	AA	AB	AB	AB	AB	BB	AB	BB	AB	BB	BB	BB	AB	AB	BB	AB	BB	AB	AB	AB	AA	AA	AA	AB
2246	tig00001690	tig00001690_135064	5	33.1	33.1	AB	AB	AA	BB	AB	BB	AA	AB	BB	AB	AB	AB	AB	AB	BB	AA	AA	AA	AB	AA	AA	AB	AB	AB	AB	BB	AB	BB	AB	BB	BB	BB	AB	AB	BB	AB	BB	AB	AB	AB	AA	AA	AA	AB
2247	tig00001690	tig00001690_136962	5	32.429	32.429	AB	AB	AA	BB	AB	BB	AA	AB	BB	AB	AB	AB	AB	AB	BB	AA	AA	AA	AB	AA	AA	AB	AB	AB	AB	BB	AB	BB	AB	BB	BB	BB	AB	AB	BB	AB	BB	AB	AB	AB	AA	AA	AA	AB
2248	tig00001690	tig00001690_137124	5	33.1	33.1	AB	AB	AA	BB	AB	BB	AA	AB	BB	AB	AB	AB	AB	AB	BB	AA	AA	AA	AB	AA	AA	AB	AB	AB	AB	BB	AB	BB	AB	BB	BB	BB	AB	AB	BB	AB	BB	AB	AB	AB	AA	AA	AA	AB
2249	tig00001690	tig00001690_137128	5	33.1	33.1	AB	AB	AA	BB	AB	BB	AA	AB	BB	AB	AB	AB	AB	AB	BB	AA	AA	AA	AB	AA	AA	AB	AB	AB	AB	BB	AB	BB	AB	BB	BB	BB	AB	AB	BB	AB	BB	AB	AB	AB	AA	AA	AA	AB
2250	tig00001690	tig00001690_137661	5	32.429	32.429	AB	AB	AA	BB	AB	BB	AA	AB	BB	AB	AB	AB	AB	AB	BB	AA	AA	AA	AB	AA	AA	AB	AB	AB	AB	BB	AB	BB	AB	BB	BB	BB	AB	AB	BB	AB	BB	AB	AB	AB	AA	AA	AA	AB
2251	tig00001690	tig00001690_139566	5	33.1	33.1	AB	AB	AA	BB	AB	BB	AA	AB	BB	AB	AB	AB	AB	AB	BB	AA	AA	AA	AB	AA	AA	AB	AB	AB	AB	BB	AB	BB	AB	BB	BB	BB	AB	AB	BB	AB	BB	AB	AB	AB	AA	AA	AA	AB
2252	tig00001690	tig00001690_139619	5	32.429	32.429	AB	AB	AA	BB	AB	BB	AA	AB	BB	AB	AB	AB	AB	AB	BB	AA	AA	AA	AB	AA	AA	AB	AB	AB	AB	BB	AB	BB	AB	BB	BB	BB	AB	AB	BB	AB	BB	AB	AB	AB	AA	AA	AA	AB
2253	tig00001690	tig00001690_139716	5	33.1	33.1	AB	AB	AA	BB	AB	BB	AA	AB	BB	AB	AB	AB	AB	AB	BB	AA	AA	AA	AB	AA	AA	AB	AB	AB	AB	BB	AB	BB	AB	BB	BB	BB	AB	AB	BB	AB	BB	AB	AB	AB	AA	AA	AA	AB
2254	tig00001690	tig00001690_140611	5	32.429	32.429	AB	AB	AA	BB	AB	BB	AA	AB	BB	AB	AB	AB	AB	AB	BB	AA	AA	AA	AB	AA	AA	AB	AB	AB	AB	BB	AB	BB	AB	BB	BB	BB	AB	AB	BB	AB	BB	AB	AB	AB	AA	AA	AA	AB
2255	tig00001690	tig00001690_142631	5	33.1	33.1	AB	AB	AA	BB	AB	BB	AA	AB	BB	AB	AB	AB	AB	AB	BB	AA	AA	AA	AB	AA	AA	AB	AB	AB	AB	BB	AB	BB	AB	BB	BB	BB	AB	AB	BB	AB	BB	AB	AB	AB	AA	AA	AA	AB
2256	tig00001690	tig00001690_142752	5	33.771	33.771	AB	AB	AA	BB	AB	BB	AA	AB	BB	AB	AB	AB	AB	AB	BB	AA	AA	AA	AB	AA	AA	AB	AB	AB	AB	BB	AB	BB	AB	BB	BB	BB	AB	AB	BB	AB	BB	AB	AB	AB	AA	AB	AA	AB
2257	tig00001690	tig00001690_142753	5	33.1	33.1	AB	AB	AA	BB	AB	BB	AA	AB	BB	AB	AB	AB	AB	AB	BB	AA	AA	AA	AB	AA	AA	AB	AB	AB	AB	BB	AB	BB	AB	BB	BB	BB	AB	AB	BB	AB	BB	AB	AB	AB	AA	AA	AA	AB
2258	tig00001690	tig00001690_142757	5	33.1	33.1	AB	AB	AA	BB	AB	BB	AA	AB	BB	AB	AB	AB	AB	AB	BB	AA	AA	AA	AB	AA	AA	AB	AB	AB	AB	BB	AB	BB	AB	BB	BB	BB	AB	AB	BB	AB	BB	AB	AB	AB	AA	AA	AA	AB
2259	tig00001690	tig00001690_142785	5	31.758	31.758	AB	AB	AA	BB	BB	BB	AA	AB	BB	AB	AB	AB	AB	AB	BB	AA	AA	AA	AB	AA	AA	AB	AB	AB	AB	BB	AB	BB	AB	BB	BB	BB	AB	AB	BB	AB	BB	AB	AB	AB	AA	AA	AA	AB
2261	tig00001690	tig00001690_167266	5	33.1	33.1	AB	AB	AA	BB	AB	BB	AA	AB	BB	AB	AB	AB	AB	AB	BB	AA	AA	AA	AB	AA	AA	AB	AB	AB	AB	BB	AB	BB	AB	BB	BB	BB	AB	AB	BB	AB	BB	AB	AB	AB	AA	AA	AA	AB
2264	tig00001690	tig00001690_172693	5	33.1	33.1	AB	AB	AA	BB	AB	BB	AA	AB	BB	AB	AB	AB	AB	AB	BB	AA	AA	AA	AB	AA	AA	AB	AB	AB	AB	BB	AB	BB	AB	BB	BB	BB	AB	AB	BB	AB	BB	AB	AB	AB	AA	AA	AA	AB
2267	tig00001690	tig00001690_173496	5	33.1	33.1	AB	AB	AA	BB	AB	BB	AA	AB	BB	AB	AB	AB	AB	AB	BB	AA	AA	AA	AB	AA	AA	AB	AB	AB	AB	BB	AB	BB	AB	BB	BB	BB	AB	AB	BB	AB	BB	AB	AB	AB	AA	AA	AA	AB
2270	tig00001690	tig00001690_176916	5	33.1	33.1	AB	AB	AA	BB	AB	BB	AA	AB	BB	AB	AB	AB	AB	AB	BB	AA	AA	AA	AB	AA	AA	AB	AB	AB	AB	BB	AB	BB	AB	BB	BB	BB	AB	AB	BB	AB	BB	AB	AB	AB	AA	AA	AA	AB
2271	tig00001690	tig00001690_177275	5	33.1	33.1	AB	AB	AA	BB	AB	BB	AA	AB	BB	AB	AB	AB	AB	AB	BB	AA	AA	AA	AB	AA	AA	AB	AB	AB	AB	BB	AB	BB	AB	BB	BB	BB	AB	AB	BB	AB	BB	AB	AB	AB	AA	AA	AA	AB
2272	tig00001690	tig00001690_178738	5	33.1	33.1	AB	AB	AA	BB	AB	BB	AA	AB	BB	AB	AB	AB	AB	AB	BB	AA	AA	AA	AB	AA	AA	AB	AB	AB	AB	BB	AB	BB	AB	BB	BB	BB	AB	AB	BB	AB	BB	AB	AB	AB	AA	AA	AA	AB
2273	tig00001690	tig00001690_179083	5	33.1	33.1	AB	AB	AA	BB	AB	BB	AA	AB	BB	AB	AB	AB	AB	AB	BB	AA	AA	AA	AB	AA	AA	AB	AB	AB	AB	BB	AB	BB	AB	BB	BB	BB	AB	AB	BB	AB	BB	AB	AB	AB	AA	AA	AA	AB
2274	tig00001690	tig00001690_179139	5	33.1	33.1	AB	AB	AA	BB	AB	BB	AA	AB	BB	AB	AB	AB	AB	AB	BB	AA	AA	AA	AB	AA	AA	AB	AB	AB	AB	BB	AB	BB	AB	BB	BB	BB	AB	AB	BB	AB	BB	AB	AB	AB	AA	AA	AA	AB
2276	tig00001690	tig00001690_179344	5	33.1	33.1	AB	AB	AA	BB	AB	BB	AA	AB	BB	AB	AB	AB	AB	AB	BB	AA	AA	AA	AB	AA	AA	AB	AB	AB	AB	BB	AB	BB	AB	BB	BB	BB	AB	AB	BB	AB	BB	AB	AB	AB	AA	AA	AA	AB
2277	tig00001690	tig00001690_179345	5	33.1	33.1	AB	AB	AA	BB	AB	BB	AA	AB	BB	AB	AB	AB	AB	AB	BB	AA	AA	AA	AB	AA	AA	AB	AB	AB	AB	BB	AB	BB	AB	BB	BB	BB	AB	AB	BB	AB	BB	AB	AB	AB	AA	AA	AA	AB
2278	tig00001690	tig00001690_179799	5	33.1	33.1	AB	AB	AA	BB	AB	BB	AA	AB	BB	AB	AB	AB	AB	AB	BB	AA	AA	AA	AB	AA	AA	AB	AB	AB	AB	BB	AB	BB	AB	BB	BB	BB	AB	AB	BB	AB	BB	AB	AB	AB	AA	AA	AA	AB
2279	tig00001690	tig00001690_179862	5	33.1	33.1	AB	AB	AA	BB	AB	BB	AA	AB	BB	AB	AB	AB	AB	AB	BB	AA	AA	AA	AB	AA	AA	AB	AB	AB	AB	BB	AB	BB	AB	BB	BB	BB	AB	AB	BB	AB	BB	AB	AB	AB	AA	AA	AA	AB
2281	tig00001690	tig00001690_181349	5	33.1	33.1	AB	AB	AA	BB	AB	BB	AA	AB	BB	AB	AB	AB	AB	AB	BB	AA	AA	AA	AB	AA	AA	AB	AB	AB	AB	BB	AB	BB	AB	BB	BB	BB	AB	AB	BB	AB	BB	AB	AB	AB	AA	AA	AA	AB
2284	tig00001690	tig00001690_185268	5	33.1	33.1	AB	AB	AA	BB	AB	BB	AA	AB	BB	AB	AB	AB	AB	AB	BB	AA	AA	AA	AB	AA	AA	AB	AB	AB	AB	BB	AB	BB	AB	BB	BB	BB	AB	AB	BB	AB	BB	AB	AB	AB	AA	AA	AA	AB
2285	tig00001690	tig00001690_185290	5	32.429	32.429	AB	AB	AA	BB	AB	BB	AA	AB	BB	AB	AB	AB	AB	AB	BB	AA	AA	AA	AB	AA	AA	AB	AB	AB	AB	BB	AB	BB	AB	BB	BB	BB	AB	AB	BB	AB	BB	AB	AB	AB	AA	AA	AA	AB
2286	tig00001690	tig00001690_188503	5	33.1	33.1	AB	AB	AA	BB	AB	BB	AA	AB	BB	AB	AB	AB	AB	AB	BB	AA	AA	AA	AB	AA	AA	AB	AB	AB	AB	BB	AB	BB	AB	BB	BB	BB	AB	AB	BB	AB	BB	AB	AB	AB	AA	AA	AA	AB
2287	tig00001690	tig00001690_188644	5	33.1	33.1	AB	AB	AA	BB	AB	BB	AA	AB	BB	AB	AB	AB	AB	AB	BB	AA	AA	AA	AB	AA	AA	AB	AB	AB	AB	BB	AB	BB	AB	BB	BB	BB	AB	AB	BB	AB	BB	AB	AB	AB	AA	AA	AA	AB
2288	tig00001690	tig00001690_192755	5	32.429	32.429	AB	AB	AA	BB	AB	BB	AA	AB	BB	AB	AB	AB	AB	AB	BB	AA	AA	AA	AB	AA	AA	AB	AB	AB	AB	BB	AB	BB	AB	BB	BB	BB	AB	AB	BB	AB	BB	AB	AB	AB	AA	AA	AA	AB
2289	tig00001690	tig00001690_192769	5	33.1	33.1	AB	AB	AA	BB	AB	BB	AA	AB	BB	AB	AB	AB	AB	AB	BB	AA	AA	AA	AB	AA	AA	AB	AB	AB	AB	BB	AB	BB	AB	BB	BB	BB	AB	AB	BB	AB	BB	AB	AB	AB	AA	AA	AA	AB
2290	tig00001690	tig00001690_192774	5	32.429	32.429	AB	AB	AA	BB	AB	BB	AA	AB	BB	AB	AB	AB	AB	AB	BB	AA	AA	AA	AB	AA	AA	AB	AB	AB	AB	BB	AB	BB	AB	BB	BB	BB	AB	AB	BB	AB	BB	AB	AB	AB	AA	AA	AA	AB
2291	tig00001690	tig00001690_193872	5	33.1	33.1	AB	AB	AA	BB	AB	BB	AA	AB	BB	AB	AB	AB	AB	AB	BB	AA	AA	AA	AB	AA	AA	AB	AB	AB	AB	BB	AB	BB	AB	BB	BB	BB	AB	AB	BB	AB	BB	AB	AB	AB	AA	AA	AA	AB
2292	tig00001690	tig00001690_193883	5	33.1	33.1	AB	AB	AA	BB	AB	BB	AA	AB	BB	AB	AB	AB	AB	AB	BB	AA	AA	AA	AB	AA	AA	AB	AB	AB	AB	BB	AB	BB	AB	BB	BB	BB	AB	AB	BB	AB	BB	AB	AB	AB	AA	AA	AA	AB
2293	tig00001690	tig00001690_193940	5	32.429	32.429	AB	AB	AA	BB	AB	BB	AA	AB	BB	AB	AB	AB	AB	AB	BB	AA	AA	AA	AB	AA	AA	AB	AB	AB	AB	BB	AB	BB	AB	BB	BB	BB	AB	AB	BB	AB	BB	AB	AB	AB	AA	AA	AA	AB
2294	tig00001690	tig00001690_194998	5	32.429	32.429	AB	AB	AA	BB	AB	BB	AA	AB	BB	AB	AB	AB	AB	AB	BB	AA	AA	AA	AB	AA	AA	AB	AB	AB	AB	BB	AB	BB	AB	BB	BB	BB	AB	AB	BB	AB	BB	AB	AB	AB	AA	AA	AA	AB
2295	tig00001690	tig00001690_211091	5	32.429	32.429	AB	AB	AA	BB	AB	BB	AA	AB	BB	AB	AB	AB	AB	AB	BB	AA	AA	AA	AB	AA	AA	AB	AB	AB	AB	BB	AB	BB	AB	BB	BB	BB	AB	AB	BB	AB	BB	AB	AB	AB	AA	AA	AA	AB
2296	tig00001690	tig00001690_211866	5	33.1	33.1	AB	AB	AA	BB	AB	BB	AA	AB	BB	AB	AB	AB	AB	AB	BB	AA	AA	AA	AB	AA	AA	AB	AB	AB	AB	BB	AB	BB	AB	BB	BB	BB	AB	AB	BB	AB	BB	AB	AB	AB	AA	AA	AA	AB
2297	tig00001690	tig00001690_211960	5	33.1	33.1	AB	AB	AA	BB	AB	BB	AA	AB	BB	AB	AB	AB	AB	AB	BB	AA	AA	AA	AB	AA	AA	AB	AB	AB	AB	BB	AB	BB	AB	BB	BB	BB	AB	AB	BB	AB	BB	AB	AB	AB	AA	AA	AA	AB
2298	tig00001690	tig00001690_212026	5	33.1	33.1	AB	AB	AA	BB	AB	BB	AA	AB	BB	AB	AB	AB	AB	AB	BB	AA	AA	AA	AB	AA	AA	AB	AB	AB	AB	BB	AB	BB	AB	BB	BB	BB	AB	AB	BB	AB	BB	AB	AB	AB	AA	AA	AA	AB
2299	tig00001690	tig00001690_212536	5	32.429	32.429	AB	AB	AA	BB	AB	BB	AA	AB	BB	AB	AB	AB	AB	AB	BB	AA	AA	AA	AB	AA	AA	AB	AB	AB	AB	BB	AB	BB	AB	BB	BB	BB	AB	AB	BB	AB	BB	AB	AB	AB	AA	AA	AA	AB
2300	tig00001690	tig00001690_212876	5	33.1	33.1	AB	AB	AA	BB	AB	BB	AA	AB	BB	AB	AB	AB	AB	AB	BB	AA	AA	AA	AB	AA	AA	AB	AB	AB	AB	BB	AB	BB	AB	BB	BB	BB	AB	AB	BB	AB	BB	AB	AB	AB	AA	AA	AA	AB
2301	tig00001690	tig00001690_212903	5	32.429	32.429	AB	AB	AA	BB	AB	BB	AA	AB	BB	AB	AB	AB	AB	AB	BB	AA	AA	AA	AB	AA	AA	AB	AB	AB	AB	BB	AB	BB	AB	BB	BB	BB	AB	AB	BB	AB	BB	AB	AB	AB	AA	AA	AA	AB
2302	tig00001690	tig00001690_214657	5	32.429	32.429	AB	AB	AA	BB	AB	BB	AA	AB	BB	AB	AB	AB	AB	AB	BB	AA	AA	AA	AB	AA	AA	AB	AB	AB	AB	BB	AB	BB	AB	BB	BB	BB	AB	AB	BB	AB	BB	AB	AB	AB	AA	AA	AA	AB
2303	tig00001690	tig00001690_217842	5	33.1	33.1	AB	AB	AA	BB	AB	BB	AA	AB	BB	AB	AB	AB	AB	AB	BB	AA	AA	AA	AB	AA	AA	AB	AB	AB	AB	BB	AB	BB	AB	BB	BB	BB	AB	AB	BB	AB	BB	AB	AB	AB	AA	AA	AA	AB
2304	tig00001690	tig00001690_220645	5	32.429	32.429	AB	AB	AA	BB	AB	BB	AA	AB	BB	AB	AB	AB	AB	AB	BB	AA	AA	AA	AB	AA	AA	AB	AB	AB	AB	BB	AB	BB	AB	BB	BB	BB	AB	AB	BB	AB	BB	AB	AB	AB	AA	AA	AA	AB
2305	tig00001690	tig00001690_220694	5	32.429	32.429	AB	AB	AA	BB	AB	BB	AA	AB	BB	AB	AB	AB	AB	AB	BB	AA	AA	AA	AB	AA	AA	AB	AB	AB	AB	BB	AB	BB	AB	BB	BB	BB	AB	AB	BB	AB	BB	AB	AB	AB	AA	AA	AA	AB
2306	tig00001690	tig00001690_220803	5	33.1	33.1	AB	AB	AA	BB	AB	BB	AA	AB	BB	AB	AB	AB	AB	AB	BB	AA	AA	AA	AB	AA	AA	AB	AB	AB	AB	BB	AB	BB	AB	BB	BB	BB	AB	AB	BB	AB	BB	AB	AB	AB	AA	AA	AA	AB
2307	tig00001690	tig00001690_220877	5	32.429	32.429	AB	AB	AA	BB	AB	BB	AA	AB	BB	AB	AB	AB	AB	AB	BB	AA	AA	AA	AB	AA	AA	AB	AB	AB	AB	BB	AB	BB	AB	BB	BB	BB	AB	AB	BB	AB	BB	AB	AB	AB	AA	AA	AA	AB
2308	tig00001690	tig00001690_228405	5	33.1	33.1	AB	AB	AA	BB	AB	BB	AA	AB	BB	AB	AB	AB	AB	AB	BB	AA	AA	AA	AB	AA	AA	AB	AB	AB	AB	BB	AB	BB	AB	BB	BB	BB	AB	AB	BB	AB	BB	AB	AB	AB	AA	AA	AA	AB
2309	tig00001690	tig00001690_228411	5	33.1	33.1	AB	AB	AA	BB	AB	BB	AA	AB	BB	AB	AB	AB	AB	AB	BB	AA	AA	AA	AB	AA	AA	AB	AB	AB	AB	BB	AB	BB	AB	BB	BB	BB	AB	AB	BB	AB	BB	AB	AB	AB	AA	AA	AA	AB
2310	tig00001690	tig00001690_228710	5	33.1	33.1	AB	AB	AA	BB	AB	BB	AA	AB	BB	AB	AB	AB	AB	AB	BB	AA	AA	AA	AB	AA	AA	AB	AB	AB	AB	BB	AB	BB	AB	BB	BB	BB	AB	AB	BB	AB	BB	AB	AB	AB	AA	AA	AA	AB
2311	tig00001690	tig00001690_260776	5	32.429	32.429	AB	AB	AA	BB	AB	BB	AA	AB	BB	AB	AB	AB	AB	AB	BB	AA	AA	AA	AB	AA	AA	AB	AB	AB	AB	BB	AB	BB	AB	BB	BB	BB	AB	AB	BB	AB	BB	AB	AB	AB	AA	AA	AA	AB
2312	tig00001690	tig00001690_262191	5	33.1	33.1	AB	AB	AA	BB	AB	BB	AA	AB	BB	AB	AB	AB	AB	AB	BB	AA	AA	AA	AB	AA	AA	AB	AB	AB	AB	BB	AB	BB	AB	BB	BB	BB	AB	AB	BB	AB	BB	AB	AB	AB	AA	AA	AA	AB
2313	tig00001690	tig00001690_262742	5	33.1	33.1	AB	AB	AA	BB	AB	BB	AA	AB	BB	AB	AB	AB	AB	AB	BB	AA	AA	AA	AB	AA	AA	AB	AB	AB	AB	BB	AB	BB	AB	BB	BB	BB	AB	AB	BB	AB	BB	AB	AB	AB	AA	AA	AA	AB
2314	tig00001690	tig00001690_265838	5	32.429	32.429	AB	AB	AA	BB	AB	BB	AA	AB	BB	AB	AB	AB	AB	AB	BB	AA	AA	AA	AB	AA	AA	AB	AB	AB	AB	BB	AB	BB	AB	BB	BB	BB	AB	AB	BB	AB	BB	AB	AB	AB	AA	AA	AA	AB
2315	tig00001690	tig00001690_266073	5	32.429	32.429	AB	AB	AA	BB	AB	BB	AA	AB	BB	AB	AB	AB	AB	AB	BB	AA	AA	AA	AB	AA	AA	AB	AB	AB	AB	BB	AB	BB	AB	BB	BB	BB	AB	AB	BB	AB	BB	AB	AB	AB	AA	AA	AA	AB
2316	tig00001690	tig00001690_266231	5	33.1	33.1	AB	AB	AA	BB	AB	BB	AA	AB	BB	AB	AB	AB	AB	AB	BB	AA	AA	AA	AB	AA	AA	AB	AB	AB	AB	BB	AB	BB	AB	BB	BB	BB	AB	AB	BB	AB	BB	AB	AB	AB	AA	AA	AA	AB
2317	tig00001690	tig00001690_276570	5	33.1	33.1	AB	AB	AA	BB	AB	BB	AA	AB	BB	AB	AB	AB	AB	AB	BB	AA	AA	AA	AB	AA	AA	AB	AB	AB	AB	BB	AB	BB	AB	BB	BB	BB	AB	AB	BB	AB	BB	AB	AB	AB	AA	AA	AA	AB
2319	tig00001690	tig00001690_283845	5	32.429	32.429	AB	AB	AA	BB	AB	BB	AA	AB	BB	AB	AB	AB	AB	AB	BB	AA	AA	AA	AB	AA	AA	AB	AB	AB	AB	BB	AB	BB	AB	BB	BB	BB	AB	AB	BB	AB	BB	AB	AB	AB	AA	AA	AA	AB
2320	tig00001690	tig00001690_291884	5	32.429	32.429	AB	AB	AA	BB	AB	BB	AA	AB	BB	AB	AB	AB	AB	AB	BB	AA	AA	AA	AB	AA	AA	AB	AB	AB	AB	BB	AB	BB	AB	BB	BB	BB	AB	AB	BB	AB	BB	AB	AB	AB	AA	AA	AA	AB
2321	tig00001690	tig00001690_296235	5	32.429	32.429	AB	AB	AA	BB	AB	BB	AA	AB	BB	AB	AB	AB	AB	AB	BB	AA	AA	AA	AB	AA	AA	AB	AB	AB	AB	BB	AB	BB	AB	BB	BB	BB	AB	AB	BB	AB	BB	AB	AB	AB	AA	AA	AA	AB
2322	tig00001690	tig00001690_296616	5	33.1	33.1	AB	AB	AA	BB	AB	BB	AA	AB	BB	AB	AB	AB	AB	AB	BB	AA	AA	AA	AB	AA	AA	AB	AB	AB	AB	BB	AB	BB	AB	BB	BB	BB	AB	AB	BB	AB	BB	AB	AB	AB	AA	AA	AA	AB
2323	tig00001690	tig00001690_370813	5	32.429	32.429	AB	AB	AA	BB	AB	BB	AA	AB	BB	AB	AB	AB	AB	AB	BB	AA	AA	AA	AB	AA	AA	AB	AB	AB	AB	BB	AB	BB	AB	BB	BB	BB	AB	AB	BB	AB	BB	AB	AB	AB	AA	AA	AA	AB
2324	tig00001690	tig00001690_371975	5	32.429	32.429	AB	AB	AA	BB	AB	BB	AA	AB	BB	AB	AB	AB	AB	AB	BB	AA	AA	AA	AB	AA	AA	AB	AB	AB	AB	BB	AB	BB	AB	BB	BB	BB	AB	AB	BB	AB	BB	AB	AB	AB	AA	AA	AA	AB
2325	tig00001690	tig00001690_371981	5	33.1	33.1	AB	AB	AA	BB	AB	BB	AA	AB	BB	AB	AB	AB	AB	AB	BB	AA	AA	AA	AB	AA	AA	AB	AB	AB	AB	BB	AB	BB	AB	BB	BB	BB	AB	AB	BB	AB	BB	AB	AB	AB	AA	AA	AA	AB
2326	tig00001690	tig00001690_372030	5	33.1	33.1	AB	AB	AA	BB	AB	BB	AA	AB	BB	AB	AB	AB	AB	AB	BB	AA	AA	AA	AB	AA	AA	AB	AB	AB	AB	BB	AB	BB	AB	BB	BB	BB	AB	AB	BB	AB	BB	AB	AB	AB	AA	AA	AA	AB
2327	tig00001690	tig00001690_372036	5	32.429	32.429	AB	AB	AA	BB	AB	BB	AA	AB	BB	AB	AB	AB	AB	AB	BB	AA	AA	AA	AB	AA	AA	AB	AB	AB	AB	BB	AB	BB	AB	BB	BB	BB	AB	AB	BB	AB	BB	AB	AB	AB	AA	AA	AA	AB
2328	tig00001690	tig00001690_372069	5	32.429	32.429	AB	AB	AA	BB	AB	BB	AA	AB	BB	AB	AB	AB	AB	AB	BB	AA	AA	AA	AB	AA	AA	AB	AB	AB	AB	BB	AB	BB	AB	BB	BB	BB	AB	AB	BB	AB	BB	AB	AB	AB	AA	AA	AA	AB
2329	tig00001690	tig00001690_372075	5	33.1	33.1	AB	AB	AA	BB	AB	BB	AA	AB	BB	AB	AB	AB	AB	AB	BB	AA	AA	AA	AB	AA	AA	AB	AB	AB	AB	BB	AB	BB	AB	BB	BB	BB	AB	AB	BB	AB	BB	AB	AB	AB	AA	AA	AA	AB
2330	tig00001690	tig00001690_372098	5	33.1	33.1	AB	AB	AA	BB	AB	BB	AA	AB	BB	AB	AB	AB	AB	AB	BB	AA	AA	AA	AB	AA	AA	AB	AB	AB	AB	BB	AB	BB	AB	BB	BB	BB	AB	AB	BB	AB	BB	AB	AB	AB	AA	AA	AA	AB
2331	tig00001690	tig00001690_372114	5	32.429	32.429	AB	AB	AA	BB	AB	BB	AA	AB	BB	AB	AB	AB	AB	AB	BB	AA	AA	AA	AB	AA	AA	AB	AB	AB	AB	BB	AB	BB	AB	BB	BB	BB	AB	AB	BB	AB	BB	AB	AB	AB	AA	AA	AA	AB
2332	tig00001690	tig00001690_372124	5	33.1	33.1	AB	AB	AA	BB	AB	BB	AA	AB	BB	AB	AB	AB	AB	AB	BB	AA	AA	AA	AB	AA	AA	AB	AB	AB	AB	BB	AB	BB	AB	BB	BB	BB	AB	AB	BB	AB	BB	AB	AB	AB	AA	AA	AA	AB
2333	tig00001690	tig00001690_372147	5	33.1	33.1	AB	AB	AA	BB	AB	BB	AA	AB	BB	AB	AB	AB	AB	AB	BB	AA	AA	AA	AB	AA	AA	AB	AB	AB	AB	BB	AB	BB	AB	BB	BB	BB	AB	AB	BB	AB	BB	AB	AB	AB	AA	AA	AA	AB
2334	tig00001690	tig00001690_382617	5	32.429	32.429	AB	AB	AA	BB	AB	BB	AA	AB	BB	AB	AB	AB	AB	AB	BB	AA	AA	AA	AB	AA	AA	AB	AB	AB	AB	BB	AB	BB	AB	BB	BB	BB	AB	AB	BB	AB	BB	AB	AB	AB	AA	AA	AA	AB
2336	tig00001690	tig00001690_402965	5	33.1	33.1	AB	AB	AA	BB	AB	BB	AA	AB	BB	AB	AB	AB	AB	AB	BB	AA	AA	AA	AB	AA	AA	AB	AB	AB	AB	BB	AB	BB	AB	BB	BB	BB	AB	AB	BB	AB	BB	AB	AB	AB	AA	AA	AA	AB
2337	tig00001690	tig00001690_424079	5	33.1	33.1	AB	AB	AA	BB	AB	BB	AA	AB	BB	AB	AB	AB	AB	AB	BB	AA	AA	AA	AB	AA	AA	AB	AB	AB	AB	BB	AB	BB	AB	BB	BB	BB	AB	AB	BB	AB	BB	AB	AB	AB	AA	AA	AA	AB
2338	tig00001690	tig00001690_424081	5	33.1	33.1	AB	AB	AA	BB	AB	BB	AA	AB	BB	AB	AB	AB	AB	AB	BB	AA	AA	AA	AB	AA	AA	AB	AB	AB	AB	BB	AB	BB	AB	BB	BB	BB	AB	AB	BB	AB	BB	AB	AB	AB	AA	AA	AA	AB
2339	tig00001690	tig00001690_428820	5	33.1	33.1	AB	AB	AA	BB	AB	BB	AA	AB	BB	AB	AB	AB	AB	AB	BB	AA	AA	AA	AB	AA	AA	AB	AB	AB	AB	BB	AB	BB	AB	BB	BB	BB	AB	AB	BB	AB	BB	AB	AB	AB	AA	AA	AA	AB
2340	tig00001690	tig00001690_428950	5	33.1	33.1	AB	AB	AA	BB	AB	BB	AA	AB	BB	AB	AB	AB	AB	AB	BB	AA	AA	AA	AB	AA	AA	AB	AB	AB	AB	BB	AB	BB	AB	BB	BB	BB	AB	AB	BB	AB	BB	AB	AB	AB	AA	AA	AA	AB
2342	tig00001690	tig00001690_429232	5	32.429	32.429	AB	AB	AA	BB	AB	BB	AA	AB	BB	AB	AB	AB	AB	AB	BB	AA	AA	AA	AB	AA	AA	AB	AB	AB	AB	BB	AB	BB	AB	BB	BB	BB	AB	AB	BB	AB	BB	AB	AB	AB	AA	AA	AA	AB
2345	tig00001690	tig00001690_429623	5	33.1	33.1	AB	AB	AA	BB	AB	BB	AA	AB	BB	AB	AB	AB	AB	AB	BB	AA	AA	AA	AB	AA	AA	AB	AB	AB	AB	BB	AB	BB	AB	BB	BB	BB	AB	AB	BB	AB	BB	AB	AB	AB	AA	AA	AA	AB
2347	tig00001690	tig00001690_429643	5	32.429	32.429	AB	AB	AA	BB	AB	BB	AA	AB	BB	AB	AB	AB	AB	AB	BB	AA	AA	AA	AB	AA	AA	AB	AB	AB	AB	BB	AB	BB	AB	BB	BB	BB	AB	AB	BB	AB	BB	AB	AB	AB	AA	AA	AA	AB
2348	tig00001690	tig00001690_429656	5	33.1	33.1	AB	AB	AA	BB	AB	BB	AA	AB	BB	AB	AB	AB	AB	AB	BB	AA	AA	AA	AB	AA	AA	AB	AB	AB	AB	BB	AB	BB	AB	BB	BB	BB	AB	AB	BB	AB	BB	AB	AB	AB	AA	AA	AA	AB
2349	tig00001690	tig00001690_429671	5	32.429	32.429	AB	AB	AA	BB	AB	BB	AA	AB	BB	AB	AB	AB	AB	AB	BB	AA	AA	AA	AB	AA	AA	AB	AB	AB	AB	BB	AB	BB	AB	BB	BB	BB	AB	AB	BB	AB	BB	AB	AB	AB	AA	AA	AA	AB
2350	tig00001690	tig00001690_432322	5	33.1	33.1	AB	AB	AA	BB	AB	BB	AA	AB	BB	AB	AB	AB	AB	AB	BB	AA	AA	AA	AB	AA	AA	AB	AB	AB	AB	BB	AB	BB	AB	BB	BB	BB	AB	AB	BB	AB	BB	AB	AB	AB	AA	AA	AA	AB
2351	tig00001690	tig00001690_432414	5	33.1	33.1	AB	AB	AA	BB	AB	BB	AA	AB	BB	AB	AB	AB	AB	AB	BB	AA	AA	AA	AB	AA	AA	AB	AB	AB	AB	BB	AB	BB	AB	BB	BB	BB	AB	AB	BB	AB	BB	AB	AB	AB	AA	AA	AA	AB
2352	tig00001690	tig00001690_432600	5	32.429	32.429	AB	AB	AA	BB	AB	BB	AA	AB	BB	AB	AB	AB	AB	AB	BB	AA	AA	AA	AB	AA	AA	AB	AB	AB	AB	BB	AB	BB	AB	BB	BB	BB	AB	AB	BB	AB	BB	AB	AB	AB	AA	AA	AA	AB
2353	tig00001690	tig00001690_432634	5	32.429	32.429	AB	AB	AA	BB	AB	BB	AA	AB	BB	AB	AB	AB	AB	AB	BB	AA	AA	AA	AB	AA	AA	AB	AB	AB	AB	BB	AB	BB	AB	BB	BB	BB	AB	AB	BB	AB	BB	AB	AB	AB	AA	AA	AA	AB
2354	tig00001690	tig00001690_432681	5	32.429	32.429	AB	AB	AA	BB	AB	BB	AA	AB	BB	AB	AB	AB	AB	AB	BB	AA	AA	AA	AB	AA	AA	AB	AB	AB	AB	BB	AB	BB	AB	BB	BB	BB	AB	AB	BB	AB	BB	AB	AB	AB	AA	AA	AA	AB
2355	tig00001690	tig00001690_437070	5	33.1	33.1	AB	AB	AA	BB	AB	BB	AA	AB	BB	AB	AB	AB	AB	AB	BB	AA	AA	AA	AB	AA	AA	AB	AB	AB	AB	BB	AB	BB	AB	BB	BB	BB	AB	AB	BB	AB	BB	AB	AB	AB	AA	AA	AA	AB
2356	tig00001690	tig00001690_437140	5	32.429	32.429	AB	AB	AA	BB	AB	BB	AA	AB	BB	AB	AB	AB	AB	AB	BB	AA	AA	AA	AB	AA	AA	AB	AB	AB	AB	BB	AB	BB	AB	BB	BB	BB	AB	AB	BB	AB	BB	AB	AB	AB	AA	AA	AA	AB
2357	tig00001690	tig00001690_437154	5	32.429	32.429	AB	AB	AA	BB	AB	BB	AA	AB	BB	AB	AB	AB	AB	AB	BB	AA	AA	AA	AB	AA	AA	AB	AB	AB	AB	BB	AB	BB	AB	BB	BB	BB	AB	AB	BB	AB	BB	AB	AB	AB	AA	AA	AA	AB
2358	tig00001690	tig00001690_437327	5	32.429	32.429	AB	AB	AA	BB	AB	BB	AA	AB	BB	AB	AB	AB	AB	AB	BB	AA	AA	AA	AB	AA	AA	AB	AB	AB	AB	BB	AB	BB	AB	BB	BB	BB	AB	AB	BB	AB	BB	AB	AB	AB	AA	AA	AA	AB
2359	tig00001690	tig00001690_439684	5	33.1	33.1	AB	AB	AA	BB	AB	BB	AA	AB	BB	AB	AB	AB	AB	AB	BB	AA	AA	AA	AB	AA	AA	AB	AB	AB	AB	BB	AB	BB	AB	BB	BB	BB	AB	AB	BB	AB	BB	AB	AB	AB	AA	AA	AA	AB
2360	tig00001690	tig00001690_442226	5	33.1	33.1	AB	AB	AA	BB	AB	BB	AA	AB	BB	AB	AB	AB	AB	AB	BB	AA	AA	AA	AB	AA	AA	AB	AB	AB	AB	BB	AB	BB	AB	BB	BB	BB	AB	AB	BB	AB	BB	AB	AB	AB	AA	AA	AA	AB
2361	tig00001690	tig00001690_442475	5	33.1	33.1	AB	AB	AA	BB	AB	BB	AA	AB	BB	AB	AB	AB	AB	AB	BB	AA	AA	AA	AB	AA	AA	AB	AB	AB	AB	BB	AB	BB	AB	BB	BB	BB	AB	AB	BB	AB	BB	AB	AB	AB	AA	AA	AA	AB
2362	tig00001690	tig00001690_449204	5	32.429	32.429	AB	AB	AA	BB	AB	BB	AA	AB	BB	AB	AB	AB	AB	AB	BB	AA	AA	AA	AB	AA	AA	AB	AB	AB	AB	BB	AB	BB	AB	BB	BB	BB	AB	AB	BB	AB	BB	AB	AB	AB	AA	AA	AA	AB
2363	tig00001690	tig00001690_455329	5	33.1	33.1	AB	AB	AA	BB	AB	BB	AA	AB	BB	AB	AB	AB	AB	AB	BB	AA	AA	AA	AB	AA	AA	AB	AB	AB	AB	BB	AB	BB	AB	BB	BB	BB	AB	AB	BB	AB	BB	AB	AB	AB	AA	AA	AA	AB
2364	tig00001690	tig00001690_455367	5	32.429	32.429	AB	AB	AA	BB	AB	BB	AA	AB	BB	AB	AB	AB	AB	AB	BB	AA	AA	AA	AB	AA	AA	AB	AB	AB	AB	BB	AB	BB	AB	BB	BB	BB	AB	AB	BB	AB	BB	AB	AB	AB	AA	AA	AA	AB
2365	tig00001690	tig00001690_455426	5	32.429	32.429	AB	AB	AA	BB	AB	BB	AA	AB	BB	AB	AB	AB	AB	AB	BB	AA	AA	AA	AB	AA	AA	AB	AB	AB	AB	BB	AB	BB	AB	BB	BB	BB	AB	AB	BB	AB	BB	AB	AB	AB	AA	AA	AA	AB
2366	tig00001690	tig00001690_456027	5	32.429	32.429	AB	AB	AA	BB	AB	BB	AA	AB	BB	AB	AB	AB	AB	AB	BB	AA	AA	AA	AB	AA	AA	AB	AB	AB	AB	BB	AB	BB	AB	BB	BB	BB	AB	AB	BB	AB	BB	AB	AB	AB	AA	AA	AA	AB
2369	tig00001690	tig00001690_474129	5	32.429	32.429	AB	AB	AA	BB	AB	BB	AA	AB	BB	AB	AB	AB	AB	AB	BB	AA	AA	AA	AB	AA	AA	AB	AB	AB	AB	BB	AB	BB	AB	BB	BB	BB	AB	AB	BB	AB	BB	AB	AB	AB	AA	AA	AA	AB
2370	tig00001690	tig00001690_474159	5	32.429	32.429	AB	AB	AA	BB	AB	BB	AA	AB	BB	AB	AB	AB	AB	AB	BB	AA	AA	AA	AB	AA	AA	AB	AB	AB	AB	BB	AB	BB	AB	BB	BB	BB	AB	AB	BB	AB	BB	AB	AB	AB	AA	AA	AA	AB
2371	tig00001690	tig00001690_480218	5	33.1	33.1	AB	AB	AA	BB	AB	BB	AA	AB	BB	AB	AB	AB	AB	AB	BB	AA	AA	AA	AB	AA	AA	AB	AB	AB	AB	BB	AB	BB	AB	BB	BB	BB	AB	AB	BB	AB	BB	AB	AB	AB	AA	AA	AA	AB
2372	tig00001690	tig00001690_482210	5	33.1	33.1	AB	AB	AA	BB	AB	BB	AA	AB	BB	AB	AB	AB	AB	AB	BB	AA	AA	AA	AB	AA	AA	AB	AB	AB	AB	BB	AB	BB	AB	BB	BB	BB	AB	AB	BB	AB	BB	AB	AB	AB	AA	AA	AA	AB
2373	tig00001694	tig00001694_87318	1	98.649	98.649	AB	AB	AA	AB	BB	AB	BB	AB	BB	AB	AB	AB	AB	BB	AB	AA	AB	AB	BB	AA	AB	AB	AB	BB	BB	BB	AB	AA	AB	AA	BB	AB	AB	AB	BB	BB	AB	AB	AB	AB	AB	AB	BB	AB
2374	tig00001694	tig00001694_87328	1	98.649	98.649	AB	AB	AA	AB	BB	AB	BB	AB	BB	AB	AB	AB	AB	BB	AB	AA	AB	AB	BB	AA	AB	AB	AB	BB	BB	BB	AB	AA	AB	AA	BB	AB	AB	AB	BB	BB	AB	AB	AB	AB	AB	AB	BB	AB
2376	tig00001694	tig00001694_96370	1	95.965	95.965	AB	AB	AA	AB	BB	AB	BB	AB	BB	AB	AB	AB	AB	BB	AB	AA	AB	AB	BB	AA	AB	AB	AA	BB	BB	BB	AB	AB	AB	AA	BB	AB	AB	AB	BB	BB	AB	AB	BB	AB	AB	AB	BB	AB
2377	tig00001694	tig00001694_96408	1	95.965	95.965	AB	AB	AA	AB	BB	AB	BB	AB	BB	AB	AB	AB	AB	BB	AB	AA	AB	AB	BB	AA	AB	AB	AA	BB	BB	BB	AB	AB	AB	AA	BB	AB	AB	AB	BB	BB	AB	AB	BB	AB	AB	AB	BB	AB
2380	tig00001694	tig00001694_117548	1	95.965	95.965	AB	AB	AA	AB	BB	AB	BB	AB	BB	AB	AB	AB	AB	BB	AB	AA	AB	AB	BB	AA	AB	AB	AA	BB	BB	BB	AB	AB	AB	AA	BB	AB	AB	AB	BB	BB	AB	AB	BB	AB	AB	AB	BB	AB
2381	tig00001694	tig00001694_117560	1	95.965	95.965	AB	AB	AA	AB	BB	AB	BB	AB	BB	AB	AB	AB	AB	BB	AB	AA	AB	AB	BB	AA	AB	AB	AA	BB	BB	BB	AB	AB	AB	AA	BB	AB	AB	AB	BB	BB	AB	AB	BB	AB	AB	AB	BB	AB
2382	tig00001694	tig00001694_117670	1	95.965	95.965	AB	AB	AA	AB	BB	AB	BB	AB	BB	AB	AB	AB	AB	BB	AB	AA	AB	AB	BB	AA	AB	AB	AA	BB	BB	BB	AB	AB	AB	AA	BB	AB	AB	AB	BB	BB	AB	AB	BB	AB	AB	AB	BB	AB
2383	tig00001694	tig00001694_117708	1	95.965	95.965	AB	AB	AA	AB	BB	AB	BB	AB	BB	AB	AB	AB	AB	BB	AB	AA	AB	AB	BB	AA	AB	AB	AA	BB	BB	BB	AB	AB	AB	AA	BB	AB	AB	AB	BB	BB	AB	AB	BB	AB	AB	AB	BB	AB
2384	tig00001694	tig00001694_117732	1	95.965	95.965	AB	AB	AA	AB	BB	AB	BB	AB	BB	AB	AB	AB	AB	BB	AB	AA	AB	AB	BB	AA	AB	AB	AA	BB	BB	BB	AB	AB	AB	AA	BB	AB	AB	AB	BB	BB	AB	AB	BB	AB	AB	AB	BB	AB
2385	tig00001694	tig00001694_130080	1	95.965	95.965	AB	AB	AA	AB	BB	AB	BB	AB	BB	AB	AB	AB	AB	BB	AB	AA	AB	AB	BB	AA	AB	AB	AA	BB	BB	BB	AB	AB	AB	AA	BB	AB	AB	AB	BB	BB	AB	AB	BB	AB	AB	AB	BB	AB
2386	tig00001694	tig00001694_130117	1	95.965	95.965	AB	AB	AA	AB	BB	AB	BB	AB	BB	AB	AB	AB	AB	BB	AB	AA	AB	AB	BB	AA	AB	AB	AA	BB	BB	BB	AB	AB	AB	AA	BB	AB	AB	AB	BB	BB	AB	AB	BB	AB	AB	AB	BB	AB
2387	tig00001694	tig00001694_137370	1	95.965	95.965	AB	AB	AA	AB	BB	AB	BB	AB	BB	AB	AB	AB	AB	BB	AB	AA	AB	AB	BB	AA	AB	AB	AA	BB	BB	BB	AB	AB	AB	AA	BB	AB	AB	AB	BB	BB	AB	AB	BB	AB	AB	AB	BB	AB
2388	tig00001694	tig00001694_137524	1	95.965	95.965	AB	AB	AA	AB	BB	AB	BB	AB	BB	AB	AB	AB	AB	BB	AB	AA	AB	AB	BB	AA	AB	AB	AA	BB	BB	BB	AB	AB	AB	AA	BB	AB	AB	AB	BB	BB	AB	AB	BB	AB	AB	AB	BB	AB
2389	tig00001694	tig00001694_148410	1	95.965	95.965	AB	AB	AA	AB	BB	AB	BB	AB	BB	AB	AB	AB	AB	BB	AB	AA	AB	AB	BB	AA	AB	AB	AA	BB	BB	BB	AB	AB	AB	AA	BB	AB	AB	AB	BB	BB	AB	AB	BB	AB	AB	AB	BB	AB
2390	tig00001694	tig00001694_152751	1	95.965	95.965	AB	AB	AA	AB	BB	AB	BB	AB	BB	AB	AB	AB	AB	BB	AB	AA	AB	AB	BB	AA	AB	AB	AA	BB	BB	BB	AB	AB	AB	AA	BB	AB	AB	AB	BB	BB	AB	AB	BB	AB	AB	AB	BB	AB
2391	tig00001694	tig00001694_155450	1	95.965	95.965	AB	AB	AA	AB	BB	AB	BB	AB	BB	AB	AB	AB	AB	BB	AB	AA	AB	AB	BB	AA	AB	AB	AA	BB	BB	BB	AB	AB	AB	AA	BB	AB	AB	AB	BB	BB	AB	AB	BB	AB	AB	AB	BB	AB
2392	tig00001694	tig00001694_155486	1	95.965	95.965	AB	AB	AA	AB	BB	AB	BB	AB	BB	AB	AB	AB	AB	BB	AB	AA	AB	AB	BB	AA	AB	AB	AA	BB	BB	BB	AB	AB	AB	AA	BB	AB	AB	AB	BB	BB	AB	AB	BB	AB	AB	AB	BB	AB
2393	tig00001694	tig00001694_155487	1	95.965	95.965	AB	AB	AA	AB	BB	AB	BB	AB	BB	AB	AB	AB	AB	BB	AB	AA	AB	AB	BB	AA	AB	AB	AA	BB	BB	BB	AB	AB	AB	AA	BB	AB	AB	AB	BB	BB	AB	AB	BB	AB	AB	AB	BB	AB
2394	tig00001694	tig00001694_155509	1	95.965	95.965	AB	AB	AA	AB	BB	AB	BB	AB	BB	AB	AB	AB	AB	BB	AB	AA	AB	AB	BB	AA	AB	AB	AA	BB	BB	BB	AB	AB	AB	AA	BB	AB	AB	AB	BB	BB	AB	AB	BB	AB	AB	AB	BB	AB
2395	tig00001694	tig00001694_155610	1	95.965	95.965	AB	AB	AA	AB	BB	AB	BB	AB	BB	AB	AB	AB	AB	BB	AB	AA	AB	AB	BB	AA	AB	AB	AA	BB	BB	BB	AB	AB	AB	AA	BB	AB	AB	AB	BB	BB	AB	AB	BB	AB	AB	AB	BB	AB
2396	tig00001694	tig00001694_155614	1	95.965	95.965	AB	AB	AA	AB	BB	AB	BB	AB	BB	AB	AB	AB	AB	BB	AB	AA	AB	AB	BB	AA	AB	AB	AA	BB	BB	BB	AB	AB	AB	AA	BB	AB	AB	AB	BB	BB	AB	AB	BB	AB	AB	AB	BB	AB
2400	tig00001694	tig00001694_155700	1	95.965	95.965	AB	AB	AA	AB	BB	AB	BB	AB	BB	AB	AB	AB	AB	BB	AB	AA	AB	AB	BB	AA	AB	AB	AA	BB	BB	BB	AB	AB	AB	AA	BB	AB	AB	AB	BB	BB	AB	AB	BB	AB	AB	AB	BB	AB
2401	tig00001694	tig00001694_157646	1	95.965	95.965	AB	AB	AA	AB	BB	AB	BB	AB	BB	AB	AB	AB	AB	BB	AB	AA	AB	AB	BB	AA	AB	AB	AA	BB	BB	BB	AB	AB	AB	AA	BB	AB	AB	AB	BB	BB	AB	AB	BB	AB	AB	AB	BB	AB
2402	tig00001694	tig00001694_157797	1	95.965	95.965	AB	AB	AA	AB	BB	AB	BB	AB	BB	AB	AB	AB	AB	BB	AB	AA	AB	AB	BB	AA	AB	AB	AA	BB	BB	BB	AB	AB	AB	AA	BB	AB	AB	AB	BB	BB	AB	AB	BB	AB	AB	AB	BB	AB
2403	tig00001694	tig00001694_157835	1	95.965	95.965	AB	AB	AA	AB	BB	AB	BB	AB	BB	AB	AB	AB	AB	BB	AB	AA	AB	AB	BB	AA	AB	AB	AA	BB	BB	BB	AB	AB	AB	AA	BB	AB	AB	AB	BB	BB	AB	AB	BB	AB	AB	AB	BB	AB
2405	tig00019577	tig00019577_25170	3	31.002	31.002	AB	AB	AB	AB	AB	AB	AB	AB	AB	AA	AB	AB	AA	BB	AA	AA	AB	AA	BB	AB	AA	AB	BB	AB	BB	AB	BB	AB	AA	AB	AB	AB	AA	AB	AA	BB	AB	AB	AB	AA	AB	BB	AA	AB
2406	tig00019577	tig00019577_25230	3	35.029	35.029	AB	AB	AB	AB	AB	AB	AB	AB	AB	AA	AB	AB	AA	BB	AA	AA	AB	AA	BB	AB	AA	AB	BB	AB	BB	AB	BB	AB	AA	AB	AB	AB	AA	AB	AA	BB	AB	AB	AB	AA	AB	BB	AA	AB
2408	tig00019577	tig00019577_88464	3	31.002	31.002	AB	AB	AB	AB	AB	AB	AB	AB	AB	AA	AB	AB	AA	BB	AA	AA	AB	AA	BB	AB	AA	AB	BB	AB	BB	AB	BB	AB	AA	AB	AB	AB	AA	AB	AA	BB	AB	AB	AB	AA	AB	BB	AA	AB
2409	tig00019577	tig00019577_126859	3	31.002	31.002	AB	AB	AB	AB	AB	AB	AB	AB	AB	AA	AB	AB	AA	BB	AA	AA	AB	AA	BB	AB	AA	AB	BB	AB	BB	AB	BB	AB	AA	AB	AB	AB	AA	AB	AA	BB	AB	AB	AB	AA	AB	BB	AA	AB
2410	tig00019577	tig00019577_126860	3	31.002	31.002	AB	AB	AB	AB	AB	AB	AB	AB	AB	AA	AB	AB	AA	BB	AA	AA	AB	AA	BB	AB	AA	AB	BB	AB	BB	AB	BB	AB	AA	AB	AB	AB	AA	AB	AA	BB	AB	AB	AB	AA	AB	BB	AA	AB
2411	tig00019577	tig00019577_198613	3	36.371	36.371	AB	AB	AB	AB	AB	AB	AB	AB	AB	AA	AB	AB	AA	BB	AA	AA	AB	AA	BB	AB	AA	AB	BB	AB	BB	AB	BB	AB	AA	AB	AB	AB	AA	AB	AA	BB	AB	AB	AB	AA	AB	BB	AA	AB
2413	tig00019577	tig00019577_323776	3	36.371	36.371	AB	AB	AB	AB	AB	AB	AB	AB	AB	AA	AB	AB	AA	BB	AA	AA	AB	AA	BB	AB	AA	AB	BB	AB	BB	AB	BB	AB	AA	AB	AB	AB	AA	AB	AA	BB	AB	AB	AB	AA	AB	BB	AA	AB
2414	tig00019577	tig00019577_364613	3	31.002	31.002	AB	AB	AB	AB	AB	AB	AB	AB	AB	AA	AB	AB	AA	BB	AA	AA	AB	AA	BB	AB	AA	AB	BB	AB	BB	AB	BB	AB	AA	AB	AB	AB	AA	AB	AA	BB	AB	AB	AB	AA	AB	BB	AA	AB
2415	tig00019577	tig00019577_364614	3	31.002	31.002	AB	AB	AB	AB	AB	AB	AB	AB	AB	AA	AB	AB	AA	BB	AA	AA	AB	AA	BB	AB	AA	AB	BB	AB	BB	AB	BB	AB	AA	AB	AB	AB	AA	AB	AA	BB	AB	AB	AB	AA	AB	BB	AA	AB
2416	tig00019577	tig00019577_386151	3	36.371	36.371	AB	AB	AB	AB	AB	AB	AB	AB	AB	AA	AB	AB	AA	BB	AA	AA	AB	AA	BB	AB	AA	AB	BB	AB	BB	AB	BB	AB	AA	AB	AB	AB	AA	AB	AA	BB	AB	AB	AB	AA	AB	BB	AA	AB
2418	ctg9296	ctg9296_22899	15	34.813	34.813	AB	AB	AB	AB	AB	AB	AB	AA	AB	AB	AB	AA	AB	BB	AB	AA	AB	AB	AB	AA	AB	AB	AB	AA	AA	AA	AB	AB	BB	BB	BB	AA	AB	AB	AB	AB	AB	AB	AB	BB	AB	BB	BB	AB
2419	ctg9296	ctg9296_23093	15	34.813	34.813	AB	AB	AB	AB	AB	AB	AB	AA	AB	AB	AB	AA	AB	BB	AB	AA	AB	AB	AB	AA	AB	AB	AB	AA	AA	AA	AB	AB	BB	BB	BB	AA	AB	AB	AB	AB	AB	AB	AB	BB	AB	BB	BB	AB
2420	ctg9296	ctg9296_23094	15	34.813	34.813	AB	AB	AB	AB	AB	AB	AB	AA	AB	AB	AB	AA	AB	BB	AB	AA	AB	AB	AB	AA	AB	AB	AB	AA	AA	AA	AB	AB	BB	BB	BB	AA	AB	AB	AB	AB	AB	AB	AB	BB	AB	BB	BB	AB
2421	ctg9296	ctg9296_25134	15	34.813	34.813	AB	AB	AB	AB	AB	AB	AB	AA	AB	AB	AB	AA	AB	BB	AB	AA	AB	AB	AB	AA	AB	AB	AB	AA	AA	AA	AB	AB	BB	BB	BB	AA	AB	AB	AB	AB	AB	AB	AB	BB	AB	BB	BB	AB
2422	ctg9296	ctg9296_34011	15	34.813	34.813	AB	AB	AB	AB	AB	AB	AB	AA	AB	AB	AB	AA	AB	BB	AB	AA	AB	AB	AB	AA	AB	AB	AB	AA	AA	AA	AB	AB	BB	BB	BB	AA	AB	AB	AB	AB	AB	AB	AB	BB	AB	BB	BB	AB
2424	ctg9296	ctg9296_41032	15	34.813	34.813	AB	AB	AB	AB	AB	AB	AB	AA	AB	AB	AB	AA	AB	BB	AB	AA	AB	AB	AB	AA	AB	AB	AB	AA	AA	AA	AB	AB	BB	BB	BB	AA	AB	AB	AB	AB	AB	AB	AB	BB	AB	BB	BB	AB
2425	ctg9296	ctg9296_41998	15	34.813	34.813	AB	AB	AB	AB	AB	AB	AB	AA	AB	AB	AB	AA	AB	BB	AB	AA	AB	AB	AB	AA	AB	AB	AB	AA	AA	AA	AB	AB	BB	BB	BB	AA	AB	AB	AB	AB	AB	AB	AB	BB	AB	BB	BB	AB
2426	ctg9296	ctg9296_42302	15	32.799	32.799	AB	AB	AB	AB	AB	AB	AB	AB	AB	AB	AB	AA	AB	BB	AB	AA	AB	AB	AB	AA	AB	AB	AB	AA	AA	AA	AB	AB	BB	BB	BB	AA	AB	AB	AB	AB	AB	AB	AB	BB	AB	BB	BB	AB
2427	ctg9296	ctg9296_42326	15	32.799	32.799	AB	AB	AB	AB	AB	AB	AB	AB	AB	AB	AB	AA	AB	BB	AB	AA	AB	AB	AB	AA	AB	AB	AB	AA	AA	AA	AB	AB	BB	BB	BB	AA	AB	AB	AB	AB	AB	AB	AB	BB	AB	BB	BB	AB
2428	ctg9296	ctg9296_42337	15	32.799	32.799	AB	AB	AB	AB	AB	AB	AB	AB	AB	AB	AB	AA	AB	BB	AB	AA	AB	AB	AB	AA	AB	AB	AB	AA	AA	AA	AB	AB	BB	BB	BB	AA	AB	AB	AB	AB	AB	AB	AB	BB	AB	BB	BB	AB
2429	ctg9296	ctg9296_42341	15	32.799	32.799	AB	AB	AB	AB	AB	AB	AB	AB	AB	AB	AB	AA	AB	BB	AB	AA	AB	AB	AB	AA	AB	AB	AB	AA	AA	AA	AB	AB	BB	BB	BB	AA	AB	AB	AB	AB	AB	AB	AB	BB	AB	BB	BB	AB
2430	ctg9296	ctg9296_42357	15	32.799	32.799	AB	AB	AB	AB	AB	AB	AB	AB	AB	AB	AB	AA	AB	BB	AB	AA	AB	AB	AB	AA	AB	AB	AB	AA	AA	AA	AB	AB	BB	BB	BB	AA	AB	AB	AB	AB	AB	AB	AB	BB	AB	BB	BB	AB
2431	ctg9296	ctg9296_42360	15	32.799	32.799	AB	AB	AB	AB	AB	AB	AB	AB	AB	AB	AB	AA	AB	BB	AB	AA	AB	AB	AB	AA	AB	AB	AB	AA	AA	AA	AB	AB	BB	BB	BB	AA	AB	AB	AB	AB	AB	AB	AB	BB	AB	BB	BB	AB
2432	ctg9296	ctg9296_42418	15	34.813	34.813	AB	AB	AB	AB	AB	AB	AB	AA	AB	AB	AB	AA	AB	BB	AB	AA	AB	AB	AB	AA	AB	AB	AB	AA	AA	AA	AB	AB	BB	BB	BB	AA	AB	AB	AB	AB	AB	AB	AB	BB	AB	BB	BB	AB
2433	ctg9296	ctg9296_53479	15	34.813	34.813	AB	AB	AB	AB	AB	AB	AB	AA	AB	AB	AB	AA	AB	BB	AB	AA	AB	AB	AB	AA	AB	AB	AB	AA	AA	AA	AB	AB	BB	BB	BB	AA	AB	AB	AB	AB	AB	AB	AB	BB	AB	BB	BB	AB
2434	ctg9296	ctg9296_53490	15	34.813	34.813	AB	AB	AB	AB	AB	AB	AB	AA	AB	AB	AB	AA	AB	BB	AB	AA	AB	AB	AB	AA	AB	AB	AB	AA	AA	AA	AB	AB	BB	BB	BB	AA	AB	AB	AB	AB	AB	AB	AB	BB	AB	BB	BB	AB
2435	ctg9296	ctg9296_53491	15	34.142	34.142	AB	AB	AB	AB	AB	AB	AB	AB	AB	AB	AB	AA	AB	BB	AB	AA	AB	AB	AB	AA	AB	AB	AB	AA	AA	AA	AB	AB	BB	BB	BB	AA	AB	AB	AB	AB	AB	AB	AB	BB	AB	BB	BB	AB
2436	ctg9296	ctg9296_61721	15	32.799	32.799	AB	AB	AB	AB	AB	AB	AB	AB	AB	AB	AB	AA	AB	BB	AB	AA	AB	AB	AB	AA	AB	AB	AB	AA	AA	AA	AB	AB	BB	BB	BB	AA	AB	AB	AB	AB	AB	AB	AB	BB	AB	BB	BB	AB
2438	ctg9296	ctg9296_72615	15	34.813	34.813	AB	AB	AB	AB	AB	AB	AB	AA	AB	AB	AB	AA	AB	BB	AB	AA	AB	AB	AB	AA	AB	AB	AB	AA	AA	AA	AB	AB	BB	BB	BB	AA	AB	AB	AB	AB	AB	AB	AB	BB	AB	BB	BB	AB
2439	ctg9296	ctg9296_72646	15	34.813	34.813	AB	AB	AB	AB	AB	AB	AB	AA	AB	AB	AB	AA	AB	BB	AB	AA	AB	AB	AB	AA	AB	AB	AB	AA	AA	AA	AB	AB	BB	BB	BB	AA	AB	AB	AB	AB	AB	AB	AB	BB	AB	BB	BB	AB
2440	ctg9296	ctg9296_74216	15	34.813	34.813	AB	AB	AB	AB	AB	AB	AB	AA	AB	AB	AB	AA	AB	BB	AB	AA	AB	AB	AB	AA	AB	AB	AB	AA	AA	AA	AB	AB	BB	BB	BB	AA	AB	AB	AB	AB	AB	AB	AB	BB	AB	BB	BB	AB
2441	ctg9296	ctg9296_74286	15	32.799	32.799	AB	AB	AB	AB	AB	AB	AB	AB	AB	AB	AB	AA	AB	BB	AB	AA	AB	AB	AB	AA	AB	AB	AB	AA	AA	AA	AB	AB	BB	BB	BB	AA	AB	AB	AB	AB	AB	AB	AB	BB	AB	BB	BB	AB
2442	ctg9296	ctg9296_74366	15	32.799	32.799	AB	AB	AB	AB	AB	AB	AB	AB	AB	AB	AB	AA	AB	BB	AB	AA	AB	AB	AB	AA	AB	AB	AB	AA	AA	AA	AB	AB	BB	BB	BB	AA	AB	AB	AB	AB	AB	AB	AB	BB	AB	BB	BB	AB
2443	ctg9296	ctg9296_74472	15	34.813	34.813	AB	AB	AB	AB	AB	AB	AB	AA	AB	AB	AB	AA	AB	BB	AB	AA	AB	AB	AB	AA	AB	AB	AB	AA	AA	AA	AB	AB	BB	BB	BB	AA	AB	AB	AB	AB	AB	AB	AB	BB	AB	BB	BB	AB
2444	ctg9296	ctg9296_74523	15	32.799	32.799	AB	AB	AB	AB	AB	AB	AB	AB	AB	AB	AB	AA	AB	BB	AB	AA	AB	AB	AB	AA	AB	AB	AB	AA	AA	AA	AB	AB	BB	BB	BB	AA	AB	AB	AB	AB	AB	AB	AB	BB	AB	BB	BB	AB
2445	ctg55981	ctg55981_3246	10	46.38	46.38	AB	AB	AA	BB	BB	AA	AB	AB	AB	BB	AB	AB	AB	BB	AB	AA	AB	AB	AB	AB	AB	AA	AB	AB	AA	AB	AB	AB	AB	AA	AA	AB	AA	AB	AB	BB	AB	AB	AB	AB	BB	BB	AA	AA
2446	ctg55981	ctg55981_3268	10	46.38	46.38	AB	AB	AA	BB	BB	AA	AB	AB	AB	BB	AB	AB	AB	BB	AB	AA	AB	AB	AB	AB	AB	AA	AB	AB	AA	AB	AB	AB	AB	AA	AA	AB	AA	AB	AB	BB	AB	AB	AB	AB	BB	BB	AA	AA
2447	ctg55981	ctg55981_3357	10	36.312	36.312	AB	AB	AB	BB	AB	AA	AB	AB	AB	BB	AB	AB	AB	BB	AA	AA	AB	AB	AB	AB	AB	AA	AB	AB	AA	BB	AB	AB	AB	AA	AA	AB	AA	AA	AB	BB	AB	AB	AB	AB	BB	BB	AA	AA
2448	ctg55981	ctg55981_5752	10	46.38	46.38	AB	AB	AA	BB	BB	AA	AB	AB	AB	BB	AB	AB	AB	BB	AB	AA	AB	AB	AB	AB	AB	AA	AB	AB	AA	AB	AB	AB	AB	AA	AA	AB	AA	AB	AB	BB	AB	AB	AB	AB	BB	BB	AA	AA
2449	ctg55981	ctg55981_5770	10	46.38	46.38	AB	AB	AA	BB	BB	AA	AB	AB	AB	BB	AB	AB	AB	BB	AB	AA	AB	AB	AB	AB	AB	AA	AB	AB	AA	AB	AB	AB	AB	AA	AA	AB	AA	AB	AB	BB	AB	AB	AB	AB	BB	BB	AA	AA
2450	ctg55981	ctg55981_6174	10	46.38	46.38	AB	AB	AA	BB	BB	AA	AB	AB	AB	BB	AB	AB	AB	BB	AB	AA	AB	AB	AB	AB	AB	AA	AB	AB	AA	AB	AB	AB	AB	AA	AA	AB	AA	AB	AB	BB	AB	AB	AB	AB	BB	BB	AA	AA
2451	ctg55981	ctg55981_6318	10	46.38	46.38	AB	AB	AA	BB	BB	AA	AB	AB	AB	BB	AB	AB	AB	BB	AB	AA	AB	AB	AB	AB	AB	AA	AB	AB	AA	AB	AB	AB	AB	AA	AA	AB	AA	AB	AB	BB	AB	AB	AB	AB	BB	BB	AA	AA
2452	ctg55981	ctg55981_6345	10	36.312	36.312	AB	AB	AB	BB	AB	AA	AB	AB	AB	BB	AB	AB	AB	BB	AA	AA	AB	AB	AB	AB	AB	AA	AB	AB	AA	BB	AB	AB	AB	AA	AA	AB	AA	AA	AB	BB	AB	AB	AB	AB	BB	BB	AA	AA
2453	ctg55981	ctg55981_6379	10	36.312	36.312	AB	AB	AB	BB	AB	AA	AB	AB	AB	BB	AB	AB	AB	BB	AA	AA	AB	AB	AB	AB	AB	AA	AB	AB	AA	BB	AB	AB	AB	AA	AA	AB	AA	AA	AB	BB	AB	AB	AB	AB	BB	BB	AA	AA
2454	ctg55981	ctg55981_6419	10	46.38	46.38	AB	AB	AA	BB	BB	AA	AB	AB	AB	BB	AB	AB	AB	BB	AB	AA	AB	AB	AB	AB	AB	AA	AB	AB	AA	AB	AB	AB	AB	AA	AA	AB	AA	AB	AB	BB	AB	AB	AB	AB	BB	BB	AA	AA
2455	ctg55981	ctg55981_6443	10	46.38	46.38	AB	AB	AA	BB	BB	AA	AB	AB	AB	BB	AB	AB	AB	BB	AB	AA	AB	AB	AB	AB	AB	AA	AB	AB	AA	AB	AB	AB	AB	AA	AA	AB	AA	AB	AB	BB	AB	AB	AB	AB	BB	BB	AA	AA
2456	ctg55981	ctg55981_6481	10	46.38	46.38	AB	AB	AA	BB	BB	AA	AB	AB	AB	BB	AB	AB	AB	BB	AB	AA	AB	AB	AB	AB	AB	AA	AB	AB	AA	AB	AB	AB	AB	AA	AA	AB	AA	AB	AB	BB	AB	AB	AB	AB	BB	BB	AA	AA
2457	ctg55981	ctg55981_6482	10	46.38	46.38	AB	AB	AA	BB	BB	AA	AB	AB	AB	BB	AB	AB	AB	BB	AB	AA	AB	AB	AB	AB	AB	AA	AB	AB	AA	AB	AB	AB	AB	AA	AA	AB	AA	AB	AB	BB	AB	AB	AB	AB	BB	BB	AA	AA
2458	ctg46400	ctg46400_11976	8	41.203	41.203	AB	AB	AA	AA	AB	AA	BB	AB	AA	AB	BB	BB	BB	AB	AB	AB	BB	AA	AB	AB	BB	BB	AB	AB	BB	AA	AB	AB	AA	AA	AB	AA	AB	AB	AB	AB	AB	AB	AA	AB	AB	AB	AB	AA
2462	contig_32501	contig_32501_49988	1	102.005	102.005	AB	AB	AA	AB	BB	AB	BB	AB	BB	AB	AB	AB	AB	BB	AB	AA	AB	AA	BB	AA	AB	AB	AB	BB	BB	BB	AB	AA	AB	AA	BB	AB	AB	AB	AB	AB	AB	AB	AA	AB	AB	AB	BB	AB
2463	contig_32501	contig_32501_51298	1	102.005	102.005	AB	AB	AA	AB	BB	AB	BB	AB	BB	AB	AB	AB	AB	BB	AB	AA	AB	AA	BB	AA	AB	AB	AB	BB	BB	BB	AB	AA	AB	AA	BB	AB	AB	AB	AB	AB	AB	AB	AA	AB	AB	AB	BB	AB
2464	contig_32501	contig_32501_111762	1	102.005	102.005	AB	AB	AA	AB	BB	AB	BB	AB	BB	AB	AB	AB	AB	BB	AB	AA	AB	AA	BB	AA	AB	AB	AB	BB	BB	BB	AB	AA	AB	AA	BB	AB	AB	AB	AB	AB	AB	AB	AA	AB	AB	AB	BB	AB
2465	contig_32501	contig_32501_111799	1	102.005	102.005	AB	AB	AA	AB	BB	AB	BB	AB	BB	AB	AB	AB	AB	BB	AB	AA	AB	AA	BB	AA	AB	AB	AB	BB	BB	BB	AB	AA	AB	AA	BB	AB	AB	AB	AB	AB	AB	AB	AA	AB	AB	AB	BB	AB
2466	contig_32501	contig_32501_111836	1	102.005	102.005	AB	AB	AA	AB	BB	AB	BB	AB	BB	AB	AB	AB	AB	BB	AB	AA	AB	AA	BB	AA	AB	AB	AB	BB	BB	BB	AB	AA	AB	AA	BB	AB	AB	AB	AB	AB	AB	AB	AA	AB	AB	AB	BB	AB
2467	contig_32501	contig_32501_113323	1	102.005	102.005	AB	AB	AA	AB	BB	AB	BB	AB	BB	AB	AB	AB	AB	BB	AB	AA	AB	AA	BB	AA	AB	AB	AB	BB	BB	BB	AB	AA	AB	AA	BB	AB	AB	AB	AB	AB	AB	AB	AA	AB	AB	AB	BB	AB
2468	contig_32501	contig_32501_113390	1	102.005	102.005	AB	AB	AA	AB	BB	AB	BB	AB	BB	AB	AB	AB	AB	BB	AB	AA	AB	AA	BB	AA	AB	AB	AB	BB	BB	BB	AB	AA	AB	AA	BB	AB	AB	AB	AB	AB	AB	AB	AA	AB	AB	AB	BB	AB
2469	contig_32501	contig_32501_120618	1	102.005	102.005	AB	AB	AA	AB	BB	AB	BB	AB	BB	AB	AB	AB	AB	BB	AB	AA	AB	AA	BB	AA	AB	AB	AB	BB	BB	BB	AB	AA	AB	AA	BB	AB	AB	AB	AB	AB	AB	AB	AA	AB	AB	AB	BB	AB
2470	contig_32501	contig_32501_121188	1	102.005	102.005	AB	AB	AA	AB	BB	AB	BB	AB	BB	AB	AB	AB	AB	BB	AB	AA	AB	AA	BB	AA	AB	AB	AB	BB	BB	BB	AB	AA	AB	AA	BB	AB	AB	AB	AB	AB	AB	AB	AA	AB	AB	AB	BB	AB
2471	contig_32501	contig_32501_124619	1	102.005	102.005	AB	AB	AA	AB	BB	AB	BB	AB	BB	AB	AB	AB	AB	BB	AB	AA	AB	AA	BB	AA	AB	AB	AB	BB	BB	BB	AB	AA	AB	AA	BB	AB	AB	AB	AB	AB	AB	AB	AA	AB	AB	AB	BB	AB
2472	contig_32501	contig_32501_124822	1	102.005	102.005	AB	AB	AA	AB	BB	AB	BB	AB	BB	AB	AB	AB	AB	BB	AB	AA	AB	AA	BB	AA	AB	AB	AB	BB	BB	BB	AB	AA	AB	AA	BB	AB	AB	AB	AB	AB	AB	AB	AA	AB	AB	AB	BB	AB
2473	contig_32501	contig_32501_124883	1	102.005	102.005	AB	AB	AA	AB	BB	AB	BB	AB	BB	AB	AB	AB	AB	BB	AB	AA	AB	AA	BB	AA	AB	AB	AB	BB	BB	BB	AB	AA	AB	AA	BB	AB	AB	AB	AB	AB	AB	AB	AA	AB	AB	AB	BB	AB
2474	contig_32501	contig_32501_125960	1	102.005	102.005	AB	AB	AA	AB	BB	AB	BB	AB	BB	AB	AB	AB	AB	BB	AB	AA	AB	AA	BB	AA	AB	AB	AB	BB	BB	BB	AB	AA	AB	AA	BB	AB	AB	AB	AB	AB	AB	AB	AA	AB	AB	AB	BB	AB
2475	contig_32501	contig_32501_126028	1	102.005	102.005	AB	AB	AA	AB	BB	AB	BB	AB	BB	AB	AB	AB	AB	BB	AB	AA	AB	AA	BB	AA	AB	AB	AB	BB	BB	BB	AB	AA	AB	AA	BB	AB	AB	AB	AB	AB	AB	AB	AA	AB	AB	AB	BB	AB
2476	contig_32501	contig_32501_126031	1	102.005	102.005	AB	AB	AA	AB	BB	AB	BB	AB	BB	AB	AB	AB	AB	BB	AB	AA	AB	AA	BB	AA	AB	AB	AB	BB	BB	BB	AB	AA	AB	AA	BB	AB	AB	AB	AB	AB	AB	AB	AA	AB	AB	AB	BB	AB
2477	contig_32501	contig_32501_126051	1	102.005	102.005	AB	AB	AA	AB	BB	AB	BB	AB	BB	AB	AB	AB	AB	BB	AB	AA	AB	AA	BB	AA	AB	AB	AB	BB	BB	BB	AB	AA	AB	AA	BB	AB	AB	AB	AB	AB	AB	AB	AA	AB	AB	AB	BB	AB
2478	contig_32501	contig_32501_126170	1	102.005	102.005	AB	AB	AA	AB	BB	AB	BB	AB	BB	AB	AB	AB	AB	BB	AB	AA	AB	AA	BB	AA	AB	AB	AB	BB	BB	BB	AB	AA	AB	AA	BB	AB	AB	AB	AB	AB	AB	AB	AA	AB	AB	AB	BB	AB
2479	contig_32501	contig_32501_126171	1	102.005	102.005	AB	AB	AA	AB	BB	AB	BB	AB	BB	AB	AB	AB	AB	BB	AB	AA	AB	AA	BB	AA	AB	AB	AB	BB	BB	BB	AB	AA	AB	AA	BB	AB	AB	AB	AB	AB	AB	AB	AA	AB	AB	AB	BB	AB
2480	contig_32501	contig_32501_126260	1	102.005	102.005	AB	AB	AA	AB	BB	AB	BB	AB	BB	AB	AB	AB	AB	BB	AB	AA	AB	AA	BB	AA	AB	AB	AB	BB	BB	BB	AB	AA	AB	AA	BB	AB	AB	AB	AB	AB	AB	AB	AA	AB	AB	AB	BB	AB
2481	contig_32501	contig_32501_126297	1	102.005	102.005	AB	AB	AA	AB	BB	AB	BB	AB	BB	AB	AB	AB	AB	BB	AB	AA	AB	AA	BB	AA	AB	AB	AB	BB	BB	BB	AB	AA	AB	AA	BB	AB	AB	AB	AB	AB	AB	AB	AA	AB	AB	AB	BB	AB
2482	contig_32501	contig_32501_126347	1	102.005	102.005	AB	AB	AA	AB	BB	AB	BB	AB	BB	AB	AB	AB	AB	BB	AB	AA	AB	AA	BB	AA	AB	AB	AB	BB	BB	BB	AB	AA	AB	AA	BB	AB	AB	AB	AB	AB	AB	AB	AA	AB	AB	AB	BB	AB
2483	contig_32501	contig_32501_126358	1	104.018	104.018	AB	AB	AA	AB	BB	AB	BB	AB	BB	AB	AB	AB	AB	BB	AB	AB	AB	AA	BB	AA	AB	AB	AB	BB	BB	BB	AB	AA	AB	AB	BB	AB	AB	AB	AB	AB	AB	AB	AA	AB	AB	AB	BB	AB
2484	contig_32501	contig_32501_126367	1	102.005	102.005	AB	AB	AA	AB	BB	AB	BB	AB	BB	AB	AB	AB	AB	BB	AB	AA	AB	AA	BB	AA	AB	AB	AB	BB	BB	BB	AB	AA	AB	AA	BB	AB	AB	AB	AB	AB	AB	AB	AA	AB	AB	AB	BB	AB
2485	contig_32501	contig_32501_130282	1	102.005	102.005	AB	AB	AA	AB	BB	AB	BB	AB	BB	AB	AB	AB	AB	BB	AB	AA	AB	AA	BB	AA	AB	AB	AB	BB	BB	BB	AB	AA	AB	AA	BB	AB	AB	AB	AB	AB	AB	AB	AA	AB	AB	AB	BB	AB
2486	contig_32501	contig_32501_138066	1	102.005	102.005	AB	AB	AA	AB	BB	AB	BB	AB	BB	AB	AB	AB	AB	BB	AB	AA	AB	AA	BB	AA	AB	AB	AB	BB	BB	BB	AB	AA	AB	AA	BB	AB	AB	AB	AB	AB	AB	AB	AA	AB	AB	AB	BB	AB
2487	contig_32501	contig_32501_142837	1	102.005	102.005	AB	AB	AA	AB	BB	AB	BB	AB	BB	AB	AB	AB	AB	BB	AB	AA	AB	AA	BB	AA	AB	AB	AB	BB	BB	BB	AB	AA	AB	AA	BB	AB	AB	AB	AB	AB	AB	AB	AA	AB	AB	AB	BB	AB
2488	contig_32501	contig_32501_142897	1	102.005	102.005	AB	AB	AA	AB	BB	AB	BB	AB	BB	AB	AB	AB	AB	BB	AB	AA	AB	AA	BB	AA	AB	AB	AB	BB	BB	BB	AB	AA	AB	AA	BB	AB	AB	AB	AB	AB	AB	AB	AA	AB	AB	AB	BB	AB
2489	contig_32501	contig_32501_142942	1	102.005	102.005	AB	AB	AA	AB	BB	AB	BB	AB	BB	AB	AB	AB	AB	BB	AB	AA	AB	AA	BB	AA	AB	AB	AB	BB	BB	BB	AB	AA	AB	AA	BB	AB	AB	AB	AB	AB	AB	AB	AA	AB	AB	AB	BB	AB
2490	contig_32501	contig_32501_143002	1	102.005	102.005	AB	AB	AA	AB	BB	AB	BB	AB	BB	AB	AB	AB	AB	BB	AB	AA	AB	AA	BB	AA	AB	AB	AB	BB	BB	BB	AB	AA	AB	AA	BB	AB	AB	AB	AB	AB	AB	AB	AA	AB	AB	AB	BB	AB
2491	contig_32501	contig_32501_143082	1	102.005	102.005	AB	AB	AA	AB	BB	AB	BB	AB	BB	AB	AB	AB	AB	BB	AB	AA	AB	AA	BB	AA	AB	AB	AB	BB	BB	BB	AB	AA	AB	AA	BB	AB	AB	AB	AB	AB	AB	AB	AA	AB	AB	AB	BB	AB
2492	contig_32501	contig_32501_145064	1	102.005	102.005	AB	AB	AA	AB	BB	AB	BB	AB	BB	AB	AB	AB	AB	BB	AB	AA	AB	AA	BB	AA	AB	AB	AB	BB	BB	BB	AB	AA	AB	AA	BB	AB	AB	AB	AB	AB	AB	AB	AA	AB	AB	AB	BB	AB
2493	contig_32501	contig_32501_145232	1	102.005	102.005	AB	AB	AA	AB	BB	AB	BB	AB	BB	AB	AB	AB	AB	BB	AB	AA	AB	AA	BB	AA	AB	AB	AB	BB	BB	BB	AB	AA	AB	AA	BB	AB	AB	AB	AB	AB	AB	AB	AA	AB	AB	AB	BB	AB
2494	contig_32501	contig_32501_146616	1	102.005	102.005	AB	AB	AA	AB	BB	AB	BB	AB	BB	AB	AB	AB	AB	BB	AB	AA	AB	AA	BB	AA	AB	AB	AB	BB	BB	BB	AB	AA	AB	AA	BB	AB	AB	AB	AB	AB	AB	AB	AA	AB	AB	AB	BB	AB
2495	contig_32501	contig_32501_147069	1	102.005	102.005	AB	AB	AA	AB	BB	AB	BB	AB	BB	AB	AB	AB	AB	BB	AB	AA	AB	AA	BB	AA	AB	AB	AB	BB	BB	BB	AB	AA	AB	AA	BB	AB	AB	AB	AB	AB	AB	AB	AA	AB	AB	AB	BB	AB
2496	contig_32501	contig_32501_147071	1	102.005	102.005	AB	AB	AA	AB	BB	AB	BB	AB	BB	AB	AB	AB	AB	BB	AB	AA	AB	AA	BB	AA	AB	AB	AB	BB	BB	BB	AB	AA	AB	AA	BB	AB	AB	AB	AB	AB	AB	AB	AA	AB	AB	AB	BB	AB
2497	contig_32501	contig_32501_147075	1	102.005	102.005	AB	AB	AA	AB	BB	AB	BB	AB	BB	AB	AB	AB	AB	BB	AB	AA	AB	AA	BB	AA	AB	AB	AB	BB	BB	BB	AB	AA	AB	AA	BB	AB	AB	AB	AB	AB	AB	AB	AA	AB	AB	AB	BB	AB
2498	contig_32501	contig_32501_148264	1	102.005	102.005	AB	AB	AA	AB	BB	AB	BB	AB	BB	AB	AB	AB	AB	BB	AB	AA	AB	AA	BB	AA	AB	AB	AB	BB	BB	BB	AB	AA	AB	AA	BB	AB	AB	AB	AB	AB	AB	AB	AA	AB	AB	AB	BB	AB
2499	contig_32501	contig_32501_148559	1	102.005	102.005	AB	AB	AA	AB	BB	AB	BB	AB	BB	AB	AB	AB	AB	BB	AB	AA	AB	AA	BB	AA	AB	AB	AB	BB	BB	BB	AB	AA	AB	AA	BB	AB	AB	AB	AB	AB	AB	AB	AA	AB	AB	AB	BB	AB
2500	contig_32501	contig_32501_148632	1	102.005	102.005	AB	AB	AA	AB	BB	AB	BB	AB	BB	AB	AB	AB	AB	BB	AB	AA	AB	AA	BB	AA	AB	AB	AB	BB	BB	BB	AB	AA	AB	AA	BB	AB	AB	AB	AB	AB	AB	AB	AA	AB	AB	AB	BB	AB
2502	contig_32501	contig_32501_149149	1	102.005	102.005	AB	AB	AA	AB	BB	AB	BB	AB	BB	AB	AB	AB	AB	BB	AB	AA	AB	AA	BB	AA	AB	AB	AB	BB	BB	BB	AB	AA	AB	AA	BB	AB	AB	AB	AB	AB	AB	AB	AA	AB	AB	AB	BB	AB
2503	contig_32501	contig_32501_149151	1	102.005	102.005	AB	AB	AA	AB	BB	AB	BB	AB	BB	AB	AB	AB	AB	BB	AB	AA	AB	AA	BB	AA	AB	AB	AB	BB	BB	BB	AB	AA	AB	AA	BB	AB	AB	AB	AB	AB	AB	AB	AA	AB	AB	AB	BB	AB
2504	contig_32501	contig_32501_173593	1	102.005	102.005	AB	AB	AA	AB	BB	AB	BB	AB	BB	AB	AB	AB	AB	BB	AB	AA	AB	AA	BB	AA	AB	AB	AB	BB	BB	BB	AB	AA	AB	AA	BB	AB	AB	AB	AB	AB	AB	AB	AA	AB	AB	AB	BB	AB
2505	contig_32501	contig_32501_173831	1	102.005	102.005	AB	AB	AA	AB	BB	AB	BB	AB	BB	AB	AB	AB	AB	BB	AB	AA	AB	AA	BB	AA	AB	AB	AB	BB	BB	BB	AB	AA	AB	AA	BB	AB	AB	AB	AB	AB	AB	AB	AA	AB	AB	AB	BB	AB
2506	contig_32501	contig_32501_173940	1	102.005	102.005	AB	AB	AA	AB	BB	AB	BB	AB	BB	AB	AB	AB	AB	BB	AB	AA	AB	AA	BB	AA	AB	AB	AB	BB	BB	BB	AB	AA	AB	AA	BB	AB	AB	AB	AB	AB	AB	AB	AA	AB	AB	AB	BB	AB
2507	contig_32501	contig_32501_174040	1	102.005	102.005	AB	AB	AA	AB	BB	AB	BB	AB	BB	AB	AB	AB	AB	BB	AB	AA	AB	AA	BB	AA	AB	AB	AB	BB	BB	BB	AB	AA	AB	AA	BB	AB	AB	AB	AB	AB	AB	AB	AA	AB	AB	AB	BB	AB
2508	contig_32501	contig_32501_175770	1	102.005	102.005	AB	AB	AA	AB	BB	AB	BB	AB	BB	AB	AB	AB	AB	BB	AB	AA	AB	AA	BB	AA	AB	AB	AB	BB	BB	BB	AB	AA	AB	AA	BB	AB	AB	AB	AB	AB	AB	AB	AA	AB	AB	AB	BB	AB
2509	contig_32501	contig_32501_176674	1	102.005	102.005	AB	AB	AA	AB	BB	AB	BB	AB	BB	AB	AB	AB	AB	BB	AB	AA	AB	AA	BB	AA	AB	AB	AB	BB	BB	BB	AB	AA	AB	AA	BB	AB	AB	AB	AB	AB	AB	AB	AA	AB	AB	AB	BB	AB
2510	contig_32501	contig_32501_177555	1	102.005	102.005	AB	AB	AA	AB	BB	AB	BB	AB	BB	AB	AB	AB	AB	BB	AB	AA	AB	AA	BB	AA	AB	AB	AB	BB	BB	BB	AB	AA	AB	AA	BB	AB	AB	AB	AB	AB	AB	AB	AA	AB	AB	AB	BB	AB
2511	contig_32501	contig_32501_177589	1	102.005	102.005	AB	AB	AA	AB	BB	AB	BB	AB	BB	AB	AB	AB	AB	BB	AB	AA	AB	AA	BB	AA	AB	AB	AB	BB	BB	BB	AB	AA	AB	AA	BB	AB	AB	AB	AB	AB	AB	AB	AA	AB	AB	AB	BB	AB
2512	contig_32501	contig_32501_177643	1	102.005	102.005	AB	AB	AA	AB	BB	AB	BB	AB	BB	AB	AB	AB	AB	BB	AB	AA	AB	AA	BB	AA	AB	AB	AB	BB	BB	BB	AB	AA	AB	AA	BB	AB	AB	AB	AB	AB	AB	AB	AA	AB	AB	AB	BB	AB
2513	contig_32501	contig_32501_177880	1	102.005	102.005	AB	AB	AA	AB	BB	AB	BB	AB	BB	AB	AB	AB	AB	BB	AB	AA	AB	AA	BB	AA	AB	AB	AB	BB	BB	BB	AB	AA	AB	AA	BB	AB	AB	AB	AB	AB	AB	AB	AA	AB	AB	AB	BB	AB
2514	contig_32501	contig_32501_177909	1	102.005	102.005	AB	AB	AA	AB	BB	AB	BB	AB	BB	AB	AB	AB	AB	BB	AB	AA	AB	AA	BB	AA	AB	AB	AB	BB	BB	BB	AB	AA	AB	AA	BB	AB	AB	AB	AB	AB	AB	AB	AA	AB	AB	AB	BB	AB
2515	contig_32501	contig_32501_177916	1	102.005	102.005	AB	AB	AA	AB	BB	AB	BB	AB	BB	AB	AB	AB	AB	BB	AB	AA	AB	AA	BB	AA	AB	AB	AB	BB	BB	BB	AB	AA	AB	AA	BB	AB	AB	AB	AB	AB	AB	AB	AA	AB	AB	AB	BB	AB
2516	contig_32501	contig_32501_177929	1	102.005	102.005	AB	AB	AA	AB	BB	AB	BB	AB	BB	AB	AB	AB	AB	BB	AB	AA	AB	AA	BB	AA	AB	AB	AB	BB	BB	BB	AB	AA	AB	AA	BB	AB	AB	AB	AB	AB	AB	AB	AA	AB	AB	AB	BB	AB
2517	contig_32501	contig_32501_177966	1	102.005	102.005	AB	AB	AA	AB	BB	AB	BB	AB	BB	AB	AB	AB	AB	BB	AB	AA	AB	AA	BB	AA	AB	AB	AB	BB	BB	BB	AB	AA	AB	AA	BB	AB	AB	AB	AB	AB	AB	AB	AA	AB	AB	AB	BB	AB
2518	contig_32501	contig_32501_177975	1	102.005	102.005	AB	AB	AA	AB	BB	AB	BB	AB	BB	AB	AB	AB	AB	BB	AB	AA	AB	AA	BB	AA	AB	AB	AB	BB	BB	BB	AB	AA	AB	AA	BB	AB	AB	AB	AB	AB	AB	AB	AA	AB	AB	AB	BB	AB
2519	contig_32501	contig_32501_177984	1	102.005	102.005	AB	AB	AA	AB	BB	AB	BB	AB	BB	AB	AB	AB	AB	BB	AB	AA	AB	AA	BB	AA	AB	AB	AB	BB	BB	BB	AB	AA	AB	AA	BB	AB	AB	AB	AB	AB	AB	AB	AA	AB	AB	AB	BB	AB
2520	contig_32501	contig_32501_178051	1	102.005	102.005	AB	AB	AA	AB	BB	AB	BB	AB	BB	AB	AB	AB	AB	BB	AB	AA	AB	AA	BB	AA	AB	AB	AB	BB	BB	BB	AB	AA	AB	AA	BB	AB	AB	AB	AB	AB	AB	AB	AA	AB	AB	AB	BB	AB
2521	contig_32501	contig_32501_179889	1	102.005	102.005	AB	AB	AA	AB	BB	AB	BB	AB	BB	AB	AB	AB	AB	BB	AB	AA	AB	AA	BB	AA	AB	AB	AB	BB	BB	BB	AB	AA	AB	AA	BB	AB	AB	AB	AB	AB	AB	AB	AA	AB	AB	AB	BB	AB
2522	contig_32501	contig_32501_179913	1	102.005	102.005	AB	AB	AA	AB	BB	AB	BB	AB	BB	AB	AB	AB	AB	BB	AB	AA	AB	AA	BB	AA	AB	AB	AB	BB	BB	BB	AB	AA	AB	AA	BB	AB	AB	AB	AB	AB	AB	AB	AA	AB	AB	AB	BB	AB
2523	contig_32501	contig_32501_180157	1	102.005	102.005	AB	AB	AA	AB	BB	AB	BB	AB	BB	AB	AB	AB	AB	BB	AB	AA	AB	AA	BB	AA	AB	AB	AB	BB	BB	BB	AB	AA	AB	AA	BB	AB	AB	AB	AB	AB	AB	AB	AA	AB	AB	AB	BB	AB
2524	contig_32501	contig_32501_180178	1	102.005	102.005	AB	AB	AA	AB	BB	AB	BB	AB	BB	AB	AB	AB	AB	BB	AB	AA	AB	AA	BB	AA	AB	AB	AB	BB	BB	BB	AB	AA	AB	AA	BB	AB	AB	AB	AB	AB	AB	AB	AA	AB	AB	AB	BB	AB
2525	contig_32501	contig_32501_180183	1	102.005	102.005	AB	AB	AA	AB	BB	AB	BB	AB	BB	AB	AB	AB	AB	BB	AB	AA	AB	AA	BB	AA	AB	AB	AB	BB	BB	BB	AB	AA	AB	AA	BB	AB	AB	AB	AB	AB	AB	AB	AA	AB	AB	AB	BB	AB
2526	contig_32501	contig_32501_180393	1	104.018	104.018	AB	AB	AA	AB	BB	AB	BB	AB	BB	AB	AB	AB	AB	BB	AB	AB	AB	AA	BB	AA	AB	AB	AB	BB	BB	BB	AB	AA	AB	AB	BB	AB	AB	AB	AB	AB	AB	AB	AA	AB	AB	AB	BB	AB
2527	contig_32501	contig_32501_181809	1	102.676	102.676	AB	AB	AA	AB	BB	AB	BB	AB	BB	AB	AB	AB	AB	BB	AB	AB	AB	AA	BB	AA	AB	AB	AB	BB	BB	BB	AB	AA	AB	AA	BB	AB	AB	AB	AB	AB	AB	AB	AA	AB	AB	AB	BB	AB
2528	contig_32501	contig_32501_181827	1	102.005	102.005	AB	AB	AA	AB	BB	AB	BB	AB	BB	AB	AB	AB	AB	BB	AB	AA	AB	AA	BB	AA	AB	AB	AB	BB	BB	BB	AB	AA	AB	AA	BB	AB	AB	AB	AB	AB	AB	AB	AA	AB	AB	AB	BB	AB
2531	contig_32501	contig_32501_182098	1	102.005	102.005	AB	AB	AA	AB	BB	AB	BB	AB	BB	AB	AB	AB	AB	BB	AB	AA	AB	AA	BB	AA	AB	AB	AB	BB	BB	BB	AB	AA	AB	AA	BB	AB	AB	AB	AB	AB	AB	AB	AA	AB	AB	AB	BB	AB
2532	contig_32501	contig_32501_182174	1	102.005	102.005	AB	AB	AA	AB	BB	AB	BB	AB	BB	AB	AB	AB	AB	BB	AB	AA	AB	AA	BB	AA	AB	AB	AB	BB	BB	BB	AB	AA	AB	AA	BB	AB	AB	AB	AB	AB	AB	AB	AA	AB	AB	AB	BB	AB
2533	contig_32501	contig_32501_182357	1	102.005	102.005	AB	AB	AA	AB	BB	AB	BB	AB	BB	AB	AB	AB	AB	BB	AB	AA	AB	AA	BB	AA	AB	AB	AB	BB	BB	BB	AB	AA	AB	AA	BB	AB	AB	AB	AB	AB	AB	AB	AA	AB	AB	AB	BB	AB
2534	contig_32501	contig_32501_182420	1	102.005	102.005	AB	AB	AA	AB	BB	AB	BB	AB	BB	AB	AB	AB	AB	BB	AB	AA	AB	AA	BB	AA	AB	AB	AB	BB	BB	BB	AB	AA	AB	AA	BB	AB	AB	AB	AB	AB	AB	AB	AA	AB	AB	AB	BB	AB
2535	contig_32501	contig_32501_182702	1	102.005	102.005	AB	AB	AA	AB	BB	AB	BB	AB	BB	AB	AB	AB	AB	BB	AB	AA	AB	AA	BB	AA	AB	AB	AB	BB	BB	BB	AB	AA	AB	AA	BB	AB	AB	AB	AB	AB	AB	AB	AA	AB	AB	AB	BB	AB
2536	contig_32501	contig_32501_182773	1	102.005	102.005	AB	AB	AA	AB	BB	AB	BB	AB	BB	AB	AB	AB	AB	BB	AB	AA	AB	AA	BB	AA	AB	AB	AB	BB	BB	BB	AB	AA	AB	AA	BB	AB	AB	AB	AB	AB	AB	AB	AA	AB	AB	AB	BB	AB
2537	contig_32501	contig_32501_183237	1	102.005	102.005	AB	AB	AA	AB	BB	AB	BB	AB	BB	AB	AB	AB	AB	BB	AB	AA	AB	AA	BB	AA	AB	AB	AB	BB	BB	BB	AB	AA	AB	AA	BB	AB	AB	AB	AB	AB	AB	AB	AA	AB	AB	AB	BB	AB
2538	contig_32501	contig_32501_183334	1	102.005	102.005	AB	AB	AA	AB	BB	AB	BB	AB	BB	AB	AB	AB	AB	BB	AB	AA	AB	AA	BB	AA	AB	AB	AB	BB	BB	BB	AB	AA	AB	AA	BB	AB	AB	AB	AB	AB	AB	AB	AA	AB	AB	AB	BB	AB
2539	contig_32501	contig_32501_183549	1	102.005	102.005	AB	AB	AA	AB	BB	AB	BB	AB	BB	AB	AB	AB	AB	BB	AB	AA	AB	AA	BB	AA	AB	AB	AB	BB	BB	BB	AB	AA	AB	AA	BB	AB	AB	AB	AB	AB	AB	AB	AA	AB	AB	AB	BB	AB
2540	contig_32501	contig_32501_194803	1	102.005	102.005	AB	AB	AA	AB	BB	AB	BB	AB	BB	AB	AB	AB	AB	BB	AB	AA	AB	AA	BB	AA	AB	AB	AB	BB	BB	BB	AB	AA	AB	AA	BB	AB	AB	AB	AB	AB	AB	AB	AA	AB	AB	AB	BB	AB
2543	contig_32501	contig_32501_195423	1	102.005	102.005	AB	AB	AA	AB	BB	AB	BB	AB	BB	AB	AB	AB	AB	BB	AB	AA	AB	AA	BB	AA	AB	AB	AB	BB	BB	BB	AB	AA	AB	AA	BB	AB	AB	AB	AB	AB	AB	AB	AA	AB	AB	AB	BB	AB
2544	contig_32501	contig_32501_195434	1	102.005	102.005	AB	AB	AA	AB	BB	AB	BB	AB	BB	AB	AB	AB	AB	BB	AB	AA	AB	AA	BB	AA	AB	AB	AB	BB	BB	BB	AB	AA	AB	AA	BB	AB	AB	AB	AB	AB	AB	AB	AA	AB	AB	AB	BB	AB
2545	contig_32501	contig_32501_195435	1	102.005	102.005	AB	AB	AA	AB	BB	AB	BB	AB	BB	AB	AB	AB	AB	BB	AB	AA	AB	AA	BB	AA	AB	AB	AB	BB	BB	BB	AB	AA	AB	AA	BB	AB	AB	AB	AB	AB	AB	AB	AA	AB	AB	AB	BB	AB
2546	contig_32501	contig_32501_195504	1	102.005	102.005	AB	AB	AA	AB	BB	AB	BB	AB	BB	AB	AB	AB	AB	BB	AB	AA	AB	AA	BB	AA	AB	AB	AB	BB	BB	BB	AB	AA	AB	AA	BB	AB	AB	AB	AB	AB	AB	AB	AA	AB	AB	AB	BB	AB
2547	contig_32501	contig_32501_195545	1	102.005	102.005	AB	AB	AA	AB	BB	AB	BB	AB	BB	AB	AB	AB	AB	BB	AB	AA	AB	AA	BB	AA	AB	AB	AB	BB	BB	BB	AB	AA	AB	AA	BB	AB	AB	AB	AB	AB	AB	AB	AA	AB	AB	AB	BB	AB
2548	contig_32501	contig_32501_195627	1	102.005	102.005	AB	AB	AA	AB	BB	AB	BB	AB	BB	AB	AB	AB	AB	BB	AB	AA	AB	AA	BB	AA	AB	AB	AB	BB	BB	BB	AB	AA	AB	AA	BB	AB	AB	AB	AB	AB	AB	AB	AA	AB	AB	AB	BB	AB
2549	contig_32501	contig_32501_199191	1	102.005	102.005	AB	AB	AA	AB	BB	AB	BB	AB	BB	AB	AB	AB	AB	BB	AB	AA	AB	AA	BB	AA	AB	AB	AB	BB	BB	BB	AB	AA	AB	AA	BB	AB	AB	AB	AB	AB	AB	AB	AA	AB	AB	AB	BB	AB
2550	contig_32501	contig_32501_199344	1	102.005	102.005	AB	AB	AA	AB	BB	AB	BB	AB	BB	AB	AB	AB	AB	BB	AB	AA	AB	AA	BB	AA	AB	AB	AB	BB	BB	BB	AB	AA	AB	AA	BB	AB	AB	AB	AB	AB	AB	AB	AA	AB	AB	AB	BB	AB
2551	contig_32501	contig_32501_199362	1	102.005	102.005	AB	AB	AA	AB	BB	AB	BB	AB	BB	AB	AB	AB	AB	BB	AB	AA	AB	AA	BB	AA	AB	AB	AB	BB	BB	BB	AB	AA	AB	AA	BB	AB	AB	AB	AB	AB	AB	AB	AA	AB	AB	AB	BB	AB
2552	contig_32501	contig_32501_199406	1	102.005	102.005	AB	AB	AA	AB	BB	AB	BB	AB	BB	AB	AB	AB	AB	BB	AB	AA	AB	AA	BB	AA	AB	AB	AB	BB	BB	BB	AB	AA	AB	AA	BB	AB	AB	AB	AB	AB	AB	AB	AA	AB	AB	AB	BB	AB
2553	contig_32501	contig_32501_199435	1	102.005	102.005	AB	AB	AA	AB	BB	AB	BB	AB	BB	AB	AB	AB	AB	BB	AB	AA	AB	AA	BB	AA	AB	AB	AB	BB	BB	BB	AB	AA	AB	AA	BB	AB	AB	AB	AB	AB	AB	AB	AA	AB	AB	AB	BB	AB
2554	contig_32501	contig_32501_199459	1	102.005	102.005	AB	AB	AA	AB	BB	AB	BB	AB	BB	AB	AB	AB	AB	BB	AB	AA	AB	AA	BB	AA	AB	AB	AB	BB	BB	BB	AB	AA	AB	AA	BB	AB	AB	AB	AB	AB	AB	AB	AA	AB	AB	AB	BB	AB
2555	contig_32501	contig_32501_199477	1	102.005	102.005	AB	AB	AA	AB	BB	AB	BB	AB	BB	AB	AB	AB	AB	BB	AB	AA	AB	AA	BB	AA	AB	AB	AB	BB	BB	BB	AB	AA	AB	AA	BB	AB	AB	AB	AB	AB	AB	AB	AA	AB	AB	AB	BB	AB
2556	contig_32501	contig_32501_199487	1	102.005	102.005	AB	AB	AA	AB	BB	AB	BB	AB	BB	AB	AB	AB	AB	BB	AB	AA	AB	AA	BB	AA	AB	AB	AB	BB	BB	BB	AB	AA	AB	AA	BB	AB	AB	AB	AB	AB	AB	AB	AA	AB	AB	AB	BB	AB
2557	contig_32501	contig_32501_199543	1	102.005	102.005	AB	AB	AA	AB	BB	AB	BB	AB	BB	AB	AB	AB	AB	BB	AB	AA	AB	AA	BB	AA	AB	AB	AB	BB	BB	BB	AB	AA	AB	AA	BB	AB	AB	AB	AB	AB	AB	AB	AA	AB	AB	AB	BB	AB
2558	contig_32501	contig_32501_199884	1	102.005	102.005	AB	AB	AA	AB	BB	AB	BB	AB	BB	AB	AB	AB	AB	BB	AB	AA	AB	AA	BB	AA	AB	AB	AB	BB	BB	BB	AB	AA	AB	AA	BB	AB	AB	AB	AB	AB	AB	AB	AA	AB	AB	AB	BB	AB
2559	ctg12902	ctg12902_18316	5	31.758	31.758	AB	AB	AA	BB	BB	BB	AA	AB	BB	AB	AB	AB	AB	AB	BB	AA	AA	AA	AB	AA	AA	AB	AB	AB	AB	BB	AB	BB	AB	BB	BB	BB	AB	AB	BB	AB	BB	AB	AB	AB	AA	AA	AA	AB
2560	ctg12902	ctg12902_20198	5	31.758	31.758	AB	AB	AA	BB	BB	BB	AA	AB	BB	AB	AB	AB	AB	AB	BB	AA	AA	AA	AB	AA	AA	AB	AB	AB	AB	BB	AB	BB	AB	BB	BB	BB	AB	AB	BB	AB	BB	AB	AB	AB	AA	AA	AA	AB
2561	ctg12902	ctg12902_20199	5	31.758	31.758	AB	AB	AA	BB	BB	BB	AA	AB	BB	AB	AB	AB	AB	AB	BB	AA	AA	AA	AB	AA	AA	AB	AB	AB	AB	BB	AB	BB	AB	BB	BB	BB	AB	AB	BB	AB	BB	AB	AB	AB	AA	AA	AA	AB
2562	ctg12902	ctg12902_20204	5	31.758	31.758	AB	AB	AA	BB	BB	BB	AA	AB	BB	AB	AB	AB	AB	AB	BB	AA	AA	AA	AB	AA	AA	AB	AB	AB	AB	BB	AB	BB	AB	BB	BB	BB	AB	AB	BB	AB	BB	AB	AB	AB	AA	AA	AA	AB
2563	ctg12902	ctg12902_30686	5	31.758	31.758	AB	AB	AA	BB	BB	BB	AA	AB	BB	AB	AB	AB	AB	AB	BB	AA	AA	AA	AB	AA	AA	AB	AB	AB	AB	BB	AB	BB	AB	BB	BB	BB	AB	AB	BB	AB	BB	AB	AB	AB	AA	AA	AA	AB
2576	ctg12904	ctg12904_13142	3	39.056	39.056	AB	AB	AB	AB	AB	AB	AB	AB	AB	AA	AB	AB	AA	BB	AA	AA	AB	AA	BB	AB	AA	AB	BB	AB	AA	AB	BB	AB	AA	AB	AB	AB	AA	AB	AB	BB	AB	AB	AB	AA	AB	BB	AA	AB
2577	ctg12904	ctg12904_13909	3	39.727	39.727	AB	AB	AB	AB	AB	AB	AB	AB	AB	AA	AB	AB	AA	BB	AA	AA	AB	AA	BB	AB	AA	AB	BB	AB	AA	AA	BB	AB	AA	AB	AB	AB	AA	AB	AB	BB	AB	AB	AB	AA	AB	BB	AA	AB
2578	ctg12904	ctg12904_13977	3	39.056	39.056	AB	AB	AB	AB	AB	AB	AB	AB	AB	AA	AB	AB	AA	BB	AA	AA	AB	AA	BB	AB	AA	AB	BB	AB	AA	AB	BB	AB	AA	AB	AB	AB	AA	AB	AB	BB	AB	AB	AB	AA	AB	BB	AA	AB
2579	ctg12904	ctg12904_13993	3	39.727	39.727	AB	AB	AB	AB	AB	AB	AB	AB	AB	AA	AB	AB	AA	BB	AA	AA	AB	AA	BB	AB	AA	AB	BB	AB	AA	AA	BB	AB	AA	AB	AB	AB	AA	AB	AB	BB	AB	AB	AB	AA	AB	BB	AA	AB
2583	ctg12908	ctg12908_107447	10	35.641	35.641	AB	AB	AB	BB	AB	AA	AB	AB	AB	BB	AB	AB	AB	BB	AA	AA	AB	AB	AB	AB	AB	AA	AB	AB	AA	BB	AB	AB	AB	AA	AA	AB	AA	AB	AB	BB	AB	AB	AB	AB	BB	BB	AA	AA
2584	ctg12908	ctg12908_111447	10	48.393	48.393	AB	AB	AA	BB	BB	AA	AB	AB	AB	BB	AB	AB	AB	BB	AB	AA	BB	AB	AB	AB	AB	AA	AB	AB	AA	AB	AB	AB	AB	AA	AA	AB	AA	BB	AB	BB	AB	AB	AB	AB	BB	BB	AA	AA
2585	ctg12908	ctg12908_111561	10	48.393	48.393	AB	AB	AA	BB	BB	AA	AB	AB	AB	BB	AB	AB	AB	BB	AB	AA	BB	AB	AB	AB	AB	AA	AB	AB	AA	AB	AB	AB	AB	AA	AA	AB	AA	BB	AB	BB	AB	AB	AB	AB	BB	BB	AA	AA
2586	ctg12908	ctg12908_111609	10	35.641	35.641	AB	AB	AB	BB	AB	AA	AB	AB	AB	BB	AB	AB	AB	BB	AA	AA	AB	AB	AB	AB	AB	AA	AB	AB	AA	BB	AB	AB	AB	AA	AA	AB	AA	AB	AB	BB	AB	AB	AB	AB	BB	BB	AA	AA
2587	ctg12908	ctg12908_111778	10	35.641	35.641	AB	AB	AB	BB	AB	AA	AB	AB	AB	BB	AB	AB	AB	BB	AA	AA	AB	AB	AB	AB	AB	AA	AB	AB	AA	BB	AB	AB	AB	AA	AA	AB	AA	AB	AB	BB	AB	AB	AB	AB	BB	BB	AA	AA
2588	ctg12908	ctg12908_111792	10	35.641	35.641	AB	AB	AB	BB	AB	AA	AB	AB	AB	BB	AB	AB	AB	BB	AA	AA	AB	AB	AB	AB	AB	AA	AB	AB	AA	BB	AB	AB	AB	AA	AA	AB	AA	AB	AB	BB	AB	AB	AB	AB	BB	BB	AA	AA
2589	ctg12908	ctg12908_111800	10	35.641	35.641	AB	AB	AB	BB	AB	AA	AB	AB	AB	BB	AB	AB	AB	BB	AA	AA	AB	AB	AB	AB	AB	AA	AB	AB	AA	BB	AB	AB	AB	AA	AA	AB	AA	AB	AB	BB	AB	AB	AB	AB	BB	BB	AA	AA
2590	ctg12908	ctg12908_111816	10	35.641	35.641	AB	AB	AB	BB	AB	AA	AB	AB	AB	BB	AB	AB	AB	BB	AA	AA	AB	AB	AB	AB	AB	AA	AB	AB	AA	BB	AB	AB	AB	AA	AA	AB	AA	AB	AB	BB	AB	AB	AB	AB	BB	BB	AA	AA
2591	ctg12908	ctg12908_111842	10	35.641	35.641	AB	AB	AB	BB	AB	AA	AB	AB	AB	BB	AB	AB	AB	BB	AA	AA	AB	AB	AB	AB	AB	AA	AB	AB	AA	BB	AB	AB	AB	AA	AA	AB	AA	AB	AB	BB	AB	AB	AB	AB	BB	BB	AA	AA
2592	ctg15020	ctg15020_17551	15	26.75	26.75	AB	AB	BB	AB	AB	AB	AB	AB	AB	AB	AB	AA	BB	BB	AB	AA	AB	BB	AB	AA	AB	AB	AB	AA	AA	AA	AB	AB	BB	BB	BB	AA	AB	AB	AB	BB	AB	AB	AB	BB	AB	BB	BB	AB
2593	ctg15020	ctg15020_41012	15	26.75	26.75	AB	AB	BB	AB	AB	AB	AB	AB	AB	AB	AB	AA	BB	BB	AB	AA	AB	BB	AB	AA	AB	AB	AB	AA	AA	AA	AB	AB	BB	BB	BB	AA	AB	AB	AB	BB	AB	AB	AB	BB	AB	BB	BB	AB
2594	ctg15020	ctg15020_44880	15	26.75	26.75	AB	AB	BB	AB	AB	AB	AB	AB	AB	AB	AB	AA	BB	BB	AB	AA	AB	BB	AB	AA	AB	AB	AB	AA	AA	AA	AB	AB	BB	BB	BB	AA	AB	AB	AB	BB	AB	AB	AB	BB	AB	BB	BB	AB
2595	ctg15020	ctg15020_50293	15	26.079	26.079	AB	AB	BB	AB	AB	AB	AB	AB	AB	AB	AB	AA	BB	BB	AB	AA	AB	BB	AB	AA	AB	AB	BB	AA	AA	AA	AB	AB	BB	BB	BB	AA	AB	AB	AB	BB	AB	AB	AB	BB	AB	BB	BB	AB
2596	ctg15020	ctg15020_54644	15	28.101	28.101	AB	AB	BB	AB	AB	AB	AB	AB	AB	AB	AB	AA	BB	BB	AB	AA	AB	BB	AB	AA	AB	AB	AB	AA	AA	AA	AB	AB	BB	BB	BB	AA	AB	AB	AB	BB	AB	AB	AB	BB	AB	BB	BB	AB
2597	ctg15029	ctg15029_23648	14	30.473	30.473	AB	AB	AA	AA	AB	AA	AB	AB	AB	AA	AB	AB	AB	AB	BB	AB	AB	BB	AA	AB	AB	AB	AA	AB	BB	AB	AB	AA	AA	AA	AB	BB	AB	AB	AB	AB	AB	AA	AA	AB	AB	AB	AB	AA
2600	ctg15029	ctg15029_117832	14	31.144	31.144	AB	AB	AA	AA	AB	AA	AB	AB	AB	AA	AB	AB	AB	AB	BB	AB	AB	BB	AA	AB	AB	AB	AA	AB	BB	AB	AB	AA	AA	AA	AB	BB	AB	AB	AB	AB	AB	AA	AA	AB	AB	AB	AB	AA
2664	tig00397540	tig00397540_151322	6	41.215	41.215	AB	AB	AB	BB	AB	BB	AB	AA	AB	BB	AA	AB	BB	AB	AB	AA	AA	AB	BB	AB	AA	AA	BB	AA	BB	AB	AB	BB	AB	AB	BB	AB	AB	BB	AA	AB	AB	BB	AB	BB	BB	AA	AB	BB
2665	tig00397540	tig00397540_151620	6	41.215	41.215	AB	AB	AB	BB	AB	BB	AB	AA	AB	BB	AA	AB	BB	AB	AB	AA	AA	AB	BB	AB	AA	AA	BB	AA	BB	AB	AB	BB	AB	AB	BB	AB	AB	BB	AA	AB	AB	BB	AB	BB	BB	AA	AB	BB
2666	tig00397540	tig00397540_151702	6	41.215	41.215	AB	AB	AB	BB	AB	BB	AB	AA	AB	BB	AA	AB	BB	AB	AB	AA	AA	AB	BB	AB	AA	AA	BB	AA	BB	AB	AB	BB	AB	AB	BB	AB	AB	BB	AA	AB	AB	BB	AB	BB	BB	AA	AB	BB
2667	tig00397540	tig00397540_169264	6	41.215	41.215	AB	AB	AB	BB	AB	BB	AB	AA	AB	BB	AA	AB	BB	AB	AB	AA	AA	AB	BB	AB	AA	AA	BB	AA	BB	AB	AB	BB	AB	AB	BB	AB	AB	BB	AA	AB	AB	BB	AB	BB	BB	AA	AB	BB
2669	tig00397540	tig00397540_229257	6	41.215	41.215	AB	AB	AB	BB	AB	BB	AB	AA	AB	BB	AA	AB	BB	AB	AB	AA	AA	AB	BB	AB	AA	AA	BB	AA	BB	AB	AB	BB	AB	AB	BB	AB	AB	BB	AA	AB	AB	BB	AB	BB	BB	AA	AB	BB
2670	tig00397540	tig00397540_230252	6	41.215	41.215	AB	AB	AB	BB	AB	BB	AB	AA	AB	BB	AA	AB	BB	AB	AB	AA	AA	AB	BB	AB	AA	AA	BB	AA	BB	AB	AB	BB	AB	AB	BB	AB	AB	BB	AA	AB	AB	BB	AB	BB	BB	AA	AB	BB
2672	tig00397540	tig00397540_230328	6	41.215	41.215	AB	AB	AB	BB	AB	BB	AB	AA	AB	BB	AA	AB	BB	AB	AB	AA	AA	AB	BB	AB	AA	AA	BB	AA	BB	AB	AB	BB	AB	AB	BB	AB	AB	BB	AA	AB	AB	BB	AB	BB	BB	AA	AB	BB
2673	tig00397540	tig00397540_230506	6	41.215	41.215	AB	AB	AB	BB	AB	BB	AB	AA	AB	BB	AA	AB	BB	AB	AB	AA	AA	AB	BB	AB	AA	AA	BB	AA	BB	AB	AB	BB	AB	AB	BB	AB	AB	BB	AA	AB	AB	BB	AB	BB	BB	AA	AB	BB
2674	tig00397540	tig00397540_230509	6	41.215	41.215	AB	AB	AB	BB	AB	BB	AB	AA	AB	BB	AA	AB	BB	AB	AB	AA	AA	AB	BB	AB	AA	AA	BB	AA	BB	AB	AB	BB	AB	AB	BB	AB	AB	BB	AA	AB	AB	BB	AB	BB	BB	AA	AB	BB
2675	tig00397540	tig00397540_237765	6	41.215	41.215	AB	AB	AB	BB	AB	BB	AB	AA	AB	BB	AA	AB	BB	AB	AB	AA	AA	AB	BB	AB	AA	AA	BB	AA	BB	AB	AB	BB	AB	AB	BB	AB	AB	BB	AA	AB	AB	BB	AB	BB	BB	AA	AB	BB
2676	tig00397540	tig00397540_251532	6	41.215	41.215	AB	AB	AB	BB	AB	BB	AB	AA	AB	BB	AA	AB	BB	AB	AB	AA	AA	AB	BB	AB	AA	AA	BB	AA	BB	AB	AB	BB	AB	AB	BB	AB	AB	BB	AA	AB	AB	BB	AB	BB	BB	AA	AB	BB
2678	tig00397540	tig00397540_254029	6	41.215	41.215	AB	AB	AB	BB	AB	BB	AB	AA	AB	BB	AA	AB	BB	AB	AB	AA	AA	AB	BB	AB	AA	AA	BB	AA	BB	AB	AB	BB	AB	AB	BB	AB	AB	BB	AA	AB	AB	BB	AB	BB	BB	AA	AB	BB
2681	tig00397540	tig00397540_265840	6	24.96	24.96	AB	AB	AB	BB	AB	BB	AB	AB	AB	BB	AB	AB	BB	AB	AB	AB	AB	AB	BB	AB	AB	AB	BB	AB	BB	AB	AB	BB	AB	AB	BB	AB	AB	BB	AB	AB	AB	BB	AB	BB	BB	AB	AB	BB
2682	tig00397540	tig00397540_266782	6	38.521	38.521	AB	AB	AB	BB	AB	BB	AB	AA	AB	BB	AA	AB	BB	AB	AB	AA	AA	AB	BB	AB	AA	AA	BB	AA	BB	AB	AB	BB	AB	AB	BB	AB	AB	BB	AA	AB	AB	BB	AB	BB	BB	AA	AB	BB
2684	tig00397540	tig00397540_268302	6	41.215	41.215	AB	AB	AB	BB	AB	BB	AB	AA	AB	BB	AA	AB	BB	AB	AB	AA	AA	AB	BB	AB	AA	AA	BB	AA	BB	AB	AB	BB	AB	AB	BB	AB	AB	BB	AA	AB	AB	BB	AB	BB	BB	AA	AB	BB
2685	tig00397540	tig00397540_278640	6	41.215	41.215	AB	AB	AB	BB	AB	BB	AB	AA	AB	BB	AA	AB	BB	AB	AB	AA	AA	AB	BB	AB	AA	AA	BB	AA	BB	AB	AB	BB	AB	AB	BB	AB	AB	BB	AA	AB	AB	BB	AB	BB	BB	AA	AB	BB
2686	tig00397540	tig00397540_278898	6	125.423	125.423	AB	AB	AB	AA	AB	AA	AB	BB	AA	AA	AB	AA	AA	AB	BB	AB	BB	AB	AB	AB	AB	AB	AB	AB	AA	AB	AB	AB	AA	BB	AA	AB	AB	AA	BB	BB	AB	AB	AB	AB	AB	AB	AB	AB
2689	tig00397540	tig00397540_305592	6	41.215	41.215	AB	AB	AB	BB	AB	BB	AB	AA	AB	BB	AA	AB	BB	AB	AB	AA	AA	AB	BB	AB	AA	AA	BB	AA	BB	AB	AB	BB	AB	AB	BB	AB	AB	BB	AA	AB	AB	BB	AB	BB	BB	AA	AB	BB
2690	tig00397540	tig00397540_307069	6	41.215	41.215	AB	AB	AB	BB	AB	BB	AB	AA	AB	BB	AA	AB	BB	AB	AB	AA	AA	AB	BB	AB	AA	AA	BB	AA	BB	AB	AB	BB	AB	AB	BB	AB	AB	BB	AA	AB	AB	BB	AB	BB	BB	AA	AB	BB
2691	tig00397540	tig00397540_309078	6	41.215	41.215	AB	AB	AB	BB	AB	BB	AB	AA	AB	BB	AA	AB	BB	AB	AB	AA	AA	AB	BB	AB	AA	AA	BB	AA	BB	AB	AB	BB	AB	AB	BB	AB	AB	BB	AA	AB	AB	BB	AB	BB	BB	AA	AB	BB
2692	tig00397540	tig00397540_309147	6	41.215	41.215	AB	AB	AB	BB	AB	BB	AB	AA	AB	BB	AA	AB	BB	AB	AB	AA	AA	AB	BB	AB	AA	AA	BB	AA	BB	AB	AB	BB	AB	AB	BB	AB	AB	BB	AA	AB	AB	BB	AB	BB	BB	AA	AB	BB
2693	tig00397540	tig00397540_311193	6	41.215	41.215	AB	AB	AB	BB	AB	BB	AB	AA	AB	BB	AA	AB	BB	AB	AB	AA	AA	AB	BB	AB	AA	AA	BB	AA	BB	AB	AB	BB	AB	AB	BB	AB	AB	BB	AA	AB	AB	BB	AB	BB	BB	AA	AB	BB
2695	tig00397540	tig00397540_317944	6	41.215	41.215	AB	AB	AB	BB	AB	BB	AB	AA	AB	BB	AA	AB	BB	AB	AB	AA	AA	AB	BB	AB	AA	AA	BB	AA	BB	AB	AB	BB	AB	AB	BB	AB	AB	BB	AA	AB	AB	BB	AB	BB	BB	AA	AB	BB
2696	tig00397540	tig00397540_318129	6	41.215	41.215	AB	AB	AB	BB	AB	BB	AB	AA	AB	BB	AA	AB	BB	AB	AB	AA	AA	AB	BB	AB	AA	AA	BB	AA	BB	AB	AB	BB	AB	AB	BB	AB	AB	BB	AA	AB	AB	BB	AB	BB	BB	AA	AB	BB
2697	tig00397540	tig00397540_324644	6	41.215	41.215	AB	AB	AB	BB	AB	BB	AB	AA	AB	BB	AA	AB	BB	AB	AB	AA	AA	AB	BB	AB	AA	AA	BB	AA	BB	AB	AB	BB	AB	AB	BB	AB	AB	BB	AA	AB	AB	BB	AB	BB	BB	AA	AB	BB
2698	tig00397540	tig00397540_324833	6	41.215	41.215	AB	AB	AB	BB	AB	BB	AB	AA	AB	BB	AA	AB	BB	AB	AB	AA	AA	AB	BB	AB	AA	AA	BB	AA	BB	AB	AB	BB	AB	AB	BB	AB	AB	BB	AA	AB	AB	BB	AB	BB	BB	AA	AB	BB
2699	tig00397540	tig00397540_324834	6	41.215	41.215	AB	AB	AB	BB	AB	BB	AB	AA	AB	BB	AA	AB	BB	AB	AB	AA	AA	AB	BB	AB	AA	AA	BB	AA	BB	AB	AB	BB	AB	AB	BB	AB	AB	BB	AA	AB	AB	BB	AB	BB	BB	AA	AB	BB
2700	tig00397540	tig00397540_326392	6	41.215	41.215	AB	AB	AB	BB	AB	BB	AB	AA	AB	BB	AA	AB	BB	AB	AB	AA	AA	AB	BB	AB	AA	AA	BB	AA	BB	AB	AB	BB	AB	AB	BB	AB	AB	BB	AA	AB	AB	BB	AB	BB	BB	AA	AB	BB
2701	tig00397540	tig00397540_339849	6	31.726	31.726	AB	AB	AB	BB	AB	BB	AB	AA	AB	BB	AB	AB	BB	AB	AB	AA	AA	AB	BB	AB	AB	AB	BB	AA	BB	AB	AB	BB	AB	AB	BB	AB	AB	BB	AB	AB	AB	BB	AB	BB	BB	AA	AB	BB
2702	tig00397540	tig00397540_339891	6	41.215	41.215	AB	AB	AB	BB	AB	BB	AB	AA	AB	BB	AA	AB	BB	AB	AB	AA	AA	AB	BB	AB	AA	AA	BB	AA	BB	AB	AB	BB	AB	AB	BB	AB	AB	BB	AA	AB	AB	BB	AB	BB	BB	AA	AB	BB
2703	tig00397540	tig00397540_339956	6	41.215	41.215	AB	AB	AB	BB	AB	BB	AB	AA	AB	BB	AA	AB	BB	AB	AB	AA	AA	AB	BB	AB	AA	AA	BB	AA	BB	AB	AB	BB	AB	AB	BB	AB	AB	BB	AA	AB	AB	BB	AB	BB	BB	AA	AB	BB
2704	tig00397540	tig00397540_340060	6	41.215	41.215	AB	AB	AB	BB	AB	BB	AB	AA	AB	BB	AA	AB	BB	AB	AB	AA	AA	AB	BB	AB	AA	AA	BB	AA	BB	AB	AB	BB	AB	AB	BB	AB	AB	BB	AA	AB	AB	BB	AB	BB	BB	AA	AB	BB
2705	tig00397540	tig00397540_341234	6	41.215	41.215	AB	AB	AB	BB	AB	BB	AB	AA	AB	BB	AA	AB	BB	AB	AB	AA	AA	AB	BB	AB	AA	AA	BB	AA	BB	AB	AB	BB	AB	AB	BB	AB	AB	BB	AA	AB	AB	BB	AB	BB	BB	AA	AB	BB
2706	tig00397540	tig00397540_344517	6	41.215	41.215	AB	AB	AB	BB	AB	BB	AB	AA	AB	BB	AA	AB	BB	AB	AB	AA	AA	AB	BB	AB	AA	AA	BB	AA	BB	AB	AB	BB	AB	AB	BB	AB	AB	BB	AA	AB	AB	BB	AB	BB	BB	AA	AB	BB
2707	tig00397540	tig00397540_346011	6	41.215	41.215	AB	AB	AB	BB	AB	BB	AB	AA	AB	BB	AA	AB	BB	AB	AB	AA	AA	AB	BB	AB	AA	AA	BB	AA	BB	AB	AB	BB	AB	AB	BB	AB	AB	BB	AA	AB	AB	BB	AB	BB	BB	AA	AB	BB
2708	tig00397540	tig00397540_370528	6	41.215	41.215	AB	AB	AB	BB	AB	BB	AB	AA	AB	BB	AA	AB	BB	AB	AB	AA	AA	AB	BB	AB	AA	AA	BB	AA	BB	AB	AB	BB	AB	AB	BB	AB	AB	BB	AA	AB	AB	BB	AB	BB	BB	AA	AB	BB
2709	tig00397540	tig00397540_370552	6	41.215	41.215	AB	AB	AB	BB	AB	BB	AB	AA	AB	BB	AA	AB	BB	AB	AB	AA	AA	AB	BB	AB	AA	AA	BB	AA	BB	AB	AB	BB	AB	AB	BB	AB	AB	BB	AA	AB	AB	BB	AB	BB	BB	AA	AB	BB
2710	tig00397540	tig00397540_379568	6	41.215	41.215	AB	AB	AB	BB	AB	BB	AB	AA	AB	BB	AA	AB	BB	AB	AB	AA	AA	AB	BB	AB	AA	AA	BB	AA	BB	AB	AB	BB	AB	AB	BB	AB	AB	BB	AA	AB	AB	BB	AB	BB	BB	AA	AB	BB
2711	tig00397540	tig00397540_392475	6	41.215	41.215	AB	AB	AB	BB	AB	BB	AB	AA	AB	BB	AA	AB	BB	AB	AB	AA	AA	AB	BB	AB	AA	AA	BB	AA	BB	AB	AB	BB	AB	AB	BB	AB	AB	BB	AA	AB	AB	BB	AB	BB	BB	AA	AB	BB
2712	tig00397540	tig00397540_409021	6	41.215	41.215	AB	AB	AB	BB	AB	BB	AB	AA	AB	BB	AA	AB	BB	AB	AB	AA	AA	AB	BB	AB	AA	AA	BB	AA	BB	AB	AB	BB	AB	AB	BB	AB	AB	BB	AA	AB	AB	BB	AB	BB	BB	AA	AB	BB
2713	tig00397540	tig00397540_409038	6	41.215	41.215	AB	AB	AB	BB	AB	BB	AB	AA	AB	BB	AA	AB	BB	AB	AB	AA	AA	AB	BB	AB	AA	AA	BB	AA	BB	AB	AB	BB	AB	AB	BB	AB	AB	BB	AA	AB	AB	BB	AB	BB	BB	AA	AB	BB
2714	tig00397540	tig00397540_409397	6	41.215	41.215	AB	AB	AB	BB	AB	BB	AB	AA	AB	BB	AA	AB	BB	AB	AB	AA	AA	AB	BB	AB	AA	AA	BB	AA	BB	AB	AB	BB	AB	AB	BB	AB	AB	BB	AA	AB	AB	BB	AB	BB	BB	AA	AB	BB
2715	tig00397540	tig00397540_410042	6	41.215	41.215	AB	AB	AB	BB	AB	BB	AB	AA	AB	BB	AA	AB	BB	AB	AB	AA	AA	AB	BB	AB	AA	AA	BB	AA	BB	AB	AB	BB	AB	AB	BB	AB	AB	BB	AA	AB	AB	BB	AB	BB	BB	AA	AB	BB
2716	tig00397540	tig00397540_410061	6	41.215	41.215	AB	AB	AB	BB	AB	BB	AB	AA	AB	BB	AA	AB	BB	AB	AB	AA	AA	AB	BB	AB	AA	AA	BB	AA	BB	AB	AB	BB	AB	AB	BB	AB	AB	BB	AA	AB	AB	BB	AB	BB	BB	AA	AB	BB
2717	tig00397540	tig00397540_410132	6	41.215	41.215	AB	AB	AB	BB	AB	BB	AB	AA	AB	BB	AA	AB	BB	AB	AB	AA	AA	AB	BB	AB	AA	AA	BB	AA	BB	AB	AB	BB	AB	AB	BB	AB	AB	BB	AA	AB	AB	BB	AB	BB	BB	AA	AB	BB
2718	tig00397540	tig00397540_410133	6	41.215	41.215	AB	AB	AB	BB	AB	BB	AB	AA	AB	BB	AA	AB	BB	AB	AB	AA	AA	AB	BB	AB	AA	AA	BB	AA	BB	AB	AB	BB	AB	AB	BB	AB	AB	BB	AA	AB	AB	BB	AB	BB	BB	AA	AB	BB
2719	tig00397540	tig00397540_410246	6	41.215	41.215	AB	AB	AB	BB	AB	BB	AB	AA	AB	BB	AA	AB	BB	AB	AB	AA	AA	AB	BB	AB	AA	AA	BB	AA	BB	AB	AB	BB	AB	AB	BB	AB	AB	BB	AA	AB	AB	BB	AB	BB	BB	AA	AB	BB
2720	tig00397540	tig00397540_414530	6	41.215	41.215	AB	AB	AB	BB	AB	BB	AB	AA	AB	BB	AA	AB	BB	AB	AB	AA	AA	AB	BB	AB	AA	AA	BB	AA	BB	AB	AB	BB	AB	AB	BB	AB	AB	BB	AA	AB	AB	BB	AB	BB	BB	AA	AB	BB
2721	tig00397540	tig00397540_436638	6	41.215	41.215	AB	AB	AB	BB	AB	BB	AB	AA	AB	BB	AA	AB	BB	AB	AB	AA	AA	AB	BB	AB	AA	AA	BB	AA	BB	AB	AB	BB	AB	AB	BB	AB	AB	BB	AA	AB	AB	BB	AB	BB	BB	AA	AB	BB
2722	tig00397540	tig00397540_439912	6	41.215	41.215	AB	AB	AB	BB	AB	BB	AB	AA	AB	BB	AA	AB	BB	AB	AB	AA	AA	AB	BB	AB	AA	AA	BB	AA	BB	AB	AB	BB	AB	AB	BB	AB	AB	BB	AA	AB	AB	BB	AB	BB	BB	AA	AB	BB
2723	tig00397540	tig00397540_439948	6	41.215	41.215	AB	AB	AB	BB	AB	BB	AB	AA	AB	BB	AA	AB	BB	AB	AB	AA	AA	AB	BB	AB	AA	AA	BB	AA	BB	AB	AB	BB	AB	AB	BB	AB	AB	BB	AA	AB	AB	BB	AB	BB	BB	AA	AB	BB
2724	tig00397540	tig00397540_440125	6	41.215	41.215	AB	AB	AB	BB	AB	BB	AB	AA	AB	BB	AA	AB	BB	AB	AB	AA	AA	AB	BB	AB	AA	AA	BB	AA	BB	AB	AB	BB	AB	AB	BB	AB	AB	BB	AA	AB	AB	BB	AB	BB	BB	AA	AB	BB
2725	tig00397540	tig00397540_440134	6	41.215	41.215	AB	AB	AB	BB	AB	BB	AB	AA	AB	BB	AA	AB	BB	AB	AB	AA	AA	AB	BB	AB	AA	AA	BB	AA	BB	AB	AB	BB	AB	AB	BB	AB	AB	BB	AA	AB	AB	BB	AB	BB	BB	AA	AB	BB
2726	tig00397540	tig00397540_440178	6	41.215	41.215	AB	AB	AB	BB	AB	BB	AB	AA	AB	BB	AA	AB	BB	AB	AB	AA	AA	AB	BB	AB	AA	AA	BB	AA	BB	AB	AB	BB	AB	AB	BB	AB	AB	BB	AA	AB	AB	BB	AB	BB	BB	AA	AB	BB
2727	tig00397540	tig00397540_447187	6	41.215	41.215	AB	AB	AB	BB	AB	BB	AB	AA	AB	BB	AA	AB	BB	AB	AB	AA	AA	AB	BB	AB	AA	AA	BB	AA	BB	AB	AB	BB	AB	AB	BB	AB	AB	BB	AA	AB	AB	BB	AB	BB	BB	AA	AB	BB
2728	tig00397540	tig00397540_447860	6	41.215	41.215	AB	AB	AB	BB	AB	BB	AB	AA	AB	BB	AA	AB	BB	AB	AB	AA	AA	AB	BB	AB	AA	AA	BB	AA	BB	AB	AB	BB	AB	AB	BB	AB	AB	BB	AA	AB	AB	BB	AB	BB	BB	AA	AB	BB
2729	tig00397540	tig00397540_447943	6	41.215	41.215	AB	AB	AB	BB	AB	BB	AB	AA	AB	BB	AA	AB	BB	AB	AB	AA	AA	AB	BB	AB	AA	AA	BB	AA	BB	AB	AB	BB	AB	AB	BB	AB	AB	BB	AA	AB	AB	BB	AB	BB	BB	AA	AB	BB
2730	tig00397540	tig00397540_447959	6	41.215	41.215	AB	AB	AB	BB	AB	BB	AB	AA	AB	BB	AA	AB	BB	AB	AB	AA	AA	AB	BB	AB	AA	AA	BB	AA	BB	AB	AB	BB	AB	AB	BB	AB	AB	BB	AA	AB	AB	BB	AB	BB	BB	AA	AB	BB
2731	tig00397540	tig00397540_457537	6	41.886	41.886	AB	AB	AB	BB	AB	BB	AB	AA	AB	BB	AA	AB	BB	AB	AB	AA	AA	AB	BB	AB	AA	AA	BB	AA	BB	AB	AB	BB	AB	AA	BB	AB	AB	BB	AA	AB	AB	BB	AB	BB	BB	AA	AB	BB
2732	tig00397540	tig00397540_457540	6	41.886	41.886	AB	AB	AB	BB	AB	BB	AB	AA	AB	BB	AA	AB	BB	AB	AB	AA	AA	AB	BB	AB	AA	AA	BB	AA	BB	AB	AB	BB	AB	AA	BB	AB	AB	BB	AA	AB	AB	BB	AB	BB	BB	AA	AB	BB
2733	tig00397540	tig00397540_457561	6	41.215	41.215	AB	AB	AB	BB	AB	BB	AB	AA	AB	BB	AA	AB	BB	AB	AB	AA	AA	AB	BB	AB	AA	AA	BB	AA	BB	AB	AB	BB	AB	AB	BB	AB	AB	BB	AA	AB	AB	BB	AB	BB	BB	AA	AB	BB
2734	tig00397540	tig00397540_457568	6	41.215	41.215	AB	AB	AB	BB	AB	BB	AB	AA	AB	BB	AA	AB	BB	AB	AB	AA	AA	AB	BB	AB	AA	AA	BB	AA	BB	AB	AB	BB	AB	AB	BB	AB	AB	BB	AA	AB	AB	BB	AB	BB	BB	AA	AB	BB
2735	tig00397540	tig00397540_459011	6	41.215	41.215	AB	AB	AB	BB	AB	BB	AB	AA	AB	BB	AA	AB	BB	AB	AB	AA	AA	AB	BB	AB	AA	AA	BB	AA	BB	AB	AB	BB	AB	AB	BB	AB	AB	BB	AA	AB	AB	BB	AB	BB	BB	AA	AB	BB
2736	tig00397540	tig00397540_465019	6	41.215	41.215	AB	AB	AB	BB	AB	BB	AB	AA	AB	BB	AA	AB	BB	AB	AB	AA	AA	AB	BB	AB	AA	AA	BB	AA	BB	AB	AB	BB	AB	AB	BB	AB	AB	BB	AA	AB	AB	BB	AB	BB	BB	AA	AB	BB
2737	tig00397540	tig00397540_506087	6	41.215	41.215	AB	AB	AB	BB	AB	BB	AB	AA	AB	BB	AA	AB	BB	AB	AB	AA	AA	AB	BB	AB	AA	AA	BB	AA	BB	AB	AB	BB	AB	AB	BB	AB	AB	BB	AA	AB	AB	BB	AB	BB	BB	AA	AB	BB
2738	tig00397540	tig00397540_506142	6	41.215	41.215	AB	AB	AB	BB	AB	BB	AB	AA	AB	BB	AA	AB	BB	AB	AB	AA	AA	AB	BB	AB	AA	AA	BB	AA	BB	AB	AB	BB	AB	AB	BB	AB	AB	BB	AA	AB	AB	BB	AB	BB	BB	AA	AB	BB
2739	tig00397540	tig00397540_512245	6	41.215	41.215	AB	AB	AB	BB	AB	BB	AB	AA	AB	BB	AA	AB	BB	AB	AB	AA	AA	AB	BB	AB	AA	AA	BB	AA	BB	AB	AB	BB	AB	AB	BB	AB	AB	BB	AA	AB	AB	BB	AB	BB	BB	AA	AB	BB
2741	tig00397540	tig00397540_558137	6	41.215	41.215	AB	AB	AB	BB	AB	BB	AB	AA	AB	BB	AA	AB	BB	AB	AB	AA	AA	AB	BB	AB	AA	AA	BB	AA	BB	AB	AB	BB	AB	AB	BB	AB	AB	BB	AA	AB	AB	BB	AB	BB	BB	AA	AB	BB
2742	tig00397540	tig00397540_572648	6	41.215	41.215	AB	AB	AB	BB	AB	BB	AB	AA	AB	BB	AA	AB	BB	AB	AB	AA	AA	AB	BB	AB	AA	AA	BB	AA	BB	AB	AB	BB	AB	AB	BB	AB	AB	BB	AA	AB	AB	BB	AB	BB	BB	AA	AB	BB
2743	tig00397540	tig00397540_572780	6	41.215	41.215	AB	AB	AB	BB	AB	BB	AB	AA	AB	BB	AA	AB	BB	AB	AB	AA	AA	AB	BB	AB	AA	AA	BB	AA	BB	AB	AB	BB	AB	AB	BB	AB	AB	BB	AA	AB	AB	BB	AB	BB	BB	AA	AB	BB
2744	tig00397540	tig00397540_572824	6	41.215	41.215	AB	AB	AB	BB	AB	BB	AB	AA	AB	BB	AA	AB	BB	AB	AB	AA	AA	AB	BB	AB	AA	AA	BB	AA	BB	AB	AB	BB	AB	AB	BB	AB	AB	BB	AA	AB	AB	BB	AB	BB	BB	AA	AB	BB
2745	tig00397540	tig00397540_572873	6	41.215	41.215	AB	AB	AB	BB	AB	BB	AB	AA	AB	BB	AA	AB	BB	AB	AB	AA	AA	AB	BB	AB	AA	AA	BB	AA	BB	AB	AB	BB	AB	AB	BB	AB	AB	BB	AA	AB	AB	BB	AB	BB	BB	AA	AB	BB
2746	tig00397540	tig00397540_572874	6	41.215	41.215	AB	AB	AB	BB	AB	BB	AB	AA	AB	BB	AA	AB	BB	AB	AB	AA	AA	AB	BB	AB	AA	AA	BB	AA	BB	AB	AB	BB	AB	AB	BB	AB	AB	BB	AA	AB	AB	BB	AB	BB	BB	AA	AB	BB
2747	tig00397540	tig00397540_572876	6	41.215	41.215	AB	AB	AB	BB	AB	BB	AB	AA	AB	BB	AA	AB	BB	AB	AB	AA	AA	AB	BB	AB	AA	AA	BB	AA	BB	AB	AB	BB	AB	AB	BB	AB	AB	BB	AA	AB	AB	BB	AB	BB	BB	AA	AB	BB
2748	tig00397540	tig00397540_572890	6	41.215	41.215	AB	AB	AB	BB	AB	BB	AB	AA	AB	BB	AA	AB	BB	AB	AB	AA	AA	AB	BB	AB	AA	AA	BB	AA	BB	AB	AB	BB	AB	AB	BB	AB	AB	BB	AA	AB	AB	BB	AB	BB	BB	AA	AB	BB
2749	tig00397540	tig00397540_572914	6	41.215	41.215	AB	AB	AB	BB	AB	BB	AB	AA	AB	BB	AA	AB	BB	AB	AB	AA	AA	AB	BB	AB	AA	AA	BB	AA	BB	AB	AB	BB	AB	AB	BB	AB	AB	BB	AA	AB	AB	BB	AB	BB	BB	AA	AB	BB
2750	tig00397540	tig00397540_634392	6	41.215	41.215	AB	AB	AB	BB	AB	BB	AB	AA	AB	BB	AA	AB	BB	AB	AB	AA	AA	AB	BB	AB	AA	AA	BB	AA	BB	AB	AB	BB	AB	AB	BB	AB	AB	BB	AA	AB	AB	BB	AB	BB	BB	AA	AB	BB
2751	tig00397540	tig00397540_634483	6	41.215	41.215	AB	AB	AB	BB	AB	BB	AB	AA	AB	BB	AA	AB	BB	AB	AB	AA	AA	AB	BB	AB	AA	AA	BB	AA	BB	AB	AB	BB	AB	AB	BB	AB	AB	BB	AA	AB	AB	BB	AB	BB	BB	AA	AB	BB
2752	tig00397540	tig00397540_636522	6	41.215	41.215	AB	AB	AB	BB	AB	BB	AB	AA	AB	BB	AA	AB	BB	AB	AB	AA	AA	AB	BB	AB	AA	AA	BB	AA	BB	AB	AB	BB	AB	AB	BB	AB	AB	BB	AA	AB	AB	BB	AB	BB	BB	AA	AB	BB
2753	tig00397540	tig00397540_673234	6	41.215	41.215	AB	AB	AB	BB	AB	BB	AB	AA	AB	BB	AA	AB	BB	AB	AB	AA	AA	AB	BB	AB	AA	AA	BB	AA	BB	AB	AB	BB	AB	AB	BB	AB	AB	BB	AA	AB	AB	BB	AB	BB	BB	AA	AB	BB
2754	tig00397540	tig00397540_673236	6	41.215	41.215	AB	AB	AB	BB	AB	BB	AB	AA	AB	BB	AA	AB	BB	AB	AB	AA	AA	AB	BB	AB	AA	AA	BB	AA	BB	AB	AB	BB	AB	AB	BB	AB	AB	BB	AA	AB	AB	BB	AB	BB	BB	AA	AB	BB
2755	tig00397540	tig00397540_673261	6	41.215	41.215	AB	AB	AB	BB	AB	BB	AB	AA	AB	BB	AA	AB	BB	AB	AB	AA	AA	AB	BB	AB	AA	AA	BB	AA	BB	AB	AB	BB	AB	AB	BB	AB	AB	BB	AA	AB	AB	BB	AB	BB	BB	AA	AB	BB
2756	tig00397540	tig00397540_679816	6	41.215	41.215	AB	AB	AB	BB	AB	BB	AB	AA	AB	BB	AA	AB	BB	AB	AB	AA	AA	AB	BB	AB	AA	AA	BB	AA	BB	AB	AB	BB	AB	AB	BB	AB	AB	BB	AA	AB	AB	BB	AB	BB	BB	AA	AB	BB
2757	tig00397540	tig00397540_680200	6	41.215	41.215	AB	AB	AB	BB	AB	BB	AB	AA	AB	BB	AA	AB	BB	AB	AB	AA	AA	AB	BB	AB	AA	AA	BB	AA	BB	AB	AB	BB	AB	AB	BB	AB	AB	BB	AA	AB	AB	BB	AB	BB	BB	AA	AB	BB
2758	tig00397540	tig00397540_682116	6	41.215	41.215	AB	AB	AB	BB	AB	BB	AB	AA	AB	BB	AA	AB	BB	AB	AB	AA	AA	AB	BB	AB	AA	AA	BB	AA	BB	AB	AB	BB	AB	AB	BB	AB	AB	BB	AA	AB	AB	BB	AB	BB	BB	AA	AB	BB
2759	tig00397540	tig00397540_682137	6	41.215	41.215	AB	AB	AB	BB	AB	BB	AB	AA	AB	BB	AA	AB	BB	AB	AB	AA	AA	AB	BB	AB	AA	AA	BB	AA	BB	AB	AB	BB	AB	AB	BB	AB	AB	BB	AA	AB	AB	BB	AB	BB	BB	AA	AB	BB
2760	tig00397540	tig00397540_682204	6	41.215	41.215	AB	AB	AB	BB	AB	BB	AB	AA	AB	BB	AA	AB	BB	AB	AB	AA	AA	AB	BB	AB	AA	AA	BB	AA	BB	AB	AB	BB	AB	AB	BB	AB	AB	BB	AA	AB	AB	BB	AB	BB	BB	AA	AB	BB
2761	tig00397540	tig00397540_682318	6	41.215	41.215	AB	AB	AB	BB	AB	BB	AB	AA	AB	BB	AA	AB	BB	AB	AB	AA	AA	AB	BB	AB	AA	AA	BB	AA	BB	AB	AB	BB	AB	AB	BB	AB	AB	BB	AA	AB	AB	BB	AB	BB	BB	AA	AB	BB
2762	tig00397540	tig00397540_682337	6	41.215	41.215	AB	AB	AB	BB	AB	BB	AB	AA	AB	BB	AA	AB	BB	AB	AB	AA	AA	AB	BB	AB	AA	AA	BB	AA	BB	AB	AB	BB	AB	AB	BB	AB	AB	BB	AA	AB	AB	BB	AB	BB	BB	AA	AB	BB
2763	tig00397540	tig00397540_689337	6	41.215	41.215	AB	AB	AB	BB	AB	BB	AB	AA	AB	BB	AA	AB	BB	AB	AB	AA	AA	AB	BB	AB	AA	AA	BB	AA	BB	AB	AB	BB	AB	AB	BB	AB	AB	BB	AA	AB	AB	BB	AB	BB	BB	AA	AB	BB
2764	tig00397540	tig00397540_689369	6	41.215	41.215	AB	AB	AB	BB	AB	BB	AB	AA	AB	BB	AA	AB	BB	AB	AB	AA	AA	AB	BB	AB	AA	AA	BB	AA	BB	AB	AB	BB	AB	AB	BB	AB	AB	BB	AA	AB	AB	BB	AB	BB	BB	AA	AB	BB
2765	tig00397540	tig00397540_689641	6	41.215	41.215	AB	AB	AB	BB	AB	BB	AB	AA	AB	BB	AA	AB	BB	AB	AB	AA	AA	AB	BB	AB	AA	AA	BB	AA	BB	AB	AB	BB	AB	AB	BB	AB	AB	BB	AA	AB	AB	BB	AB	BB	BB	AA	AB	BB
2766	tig00397540	tig00397540_692678	6	41.215	41.215	AB	AB	AB	BB	AB	BB	AB	AA	AB	BB	AA	AB	BB	AB	AB	AA	AA	AB	BB	AB	AA	AA	BB	AA	BB	AB	AB	BB	AB	AB	BB	AB	AB	BB	AA	AB	AB	BB	AB	BB	BB	AA	AB	BB
2767	tig00397540	tig00397540_692684	6	41.215	41.215	AB	AB	AB	BB	AB	BB	AB	AA	AB	BB	AA	AB	BB	AB	AB	AA	AA	AB	BB	AB	AA	AA	BB	AA	BB	AB	AB	BB	AB	AB	BB	AB	AB	BB	AA	AB	AB	BB	AB	BB	BB	AA	AB	BB
2768	tig00397540	tig00397540_695380	6	41.215	41.215	AB	AB	AB	BB	AB	BB	AB	AA	AB	BB	AA	AB	BB	AB	AB	AA	AA	AB	BB	AB	AA	AA	BB	AA	BB	AB	AB	BB	AB	AB	BB	AB	AB	BB	AA	AB	AB	BB	AB	BB	BB	AA	AB	BB
2769	tig00397540	tig00397540_714775	6	41.215	41.215	AB	AB	AB	BB	AB	BB	AB	AA	AB	BB	AA	AB	BB	AB	AB	AA	AA	AB	BB	AB	AA	AA	BB	AA	BB	AB	AB	BB	AB	AB	BB	AB	AB	BB	AA	AB	AB	BB	AB	BB	BB	AA	AB	BB
2770	tig00397540	tig00397540_717567	6	41.215	41.215	AB	AB	AB	BB	AB	BB	AB	AA	AB	BB	AA	AB	BB	AB	AB	AA	AA	AB	BB	AB	AA	AA	BB	AA	BB	AB	AB	BB	AB	AB	BB	AB	AB	BB	AA	AB	AB	BB	AB	BB	BB	AA	AB	BB
2771	tig00397540	tig00397540_717583	6	41.215	41.215	AB	AB	AB	BB	AB	BB	AB	AA	AB	BB	AA	AB	BB	AB	AB	AA	AA	AB	BB	AB	AA	AA	BB	AA	BB	AB	AB	BB	AB	AB	BB	AB	AB	BB	AA	AB	AB	BB	AB	BB	BB	AA	AB	BB
2772	tig00397540	tig00397540_717598	6	41.215	41.215	AB	AB	AB	BB	AB	BB	AB	AA	AB	BB	AA	AB	BB	AB	AB	AA	AA	AB	BB	AB	AA	AA	BB	AA	BB	AB	AB	BB	AB	AB	BB	AB	AB	BB	AA	AB	AB	BB	AB	BB	BB	AA	AB	BB
2773	tig00397540	tig00397540_717607	6	41.215	41.215	AB	AB	AB	BB	AB	BB	AB	AA	AB	BB	AA	AB	BB	AB	AB	AA	AA	AB	BB	AB	AA	AA	BB	AA	BB	AB	AB	BB	AB	AB	BB	AB	AB	BB	AA	AB	AB	BB	AB	BB	BB	AA	AB	BB
2774	tig00397540	tig00397540_717736	6	41.215	41.215	AB	AB	AB	BB	AB	BB	AB	AA	AB	BB	AA	AB	BB	AB	AB	AA	AA	AB	BB	AB	AA	AA	BB	AA	BB	AB	AB	BB	AB	AB	BB	AB	AB	BB	AA	AB	AB	BB	AB	BB	BB	AA	AB	BB
2775	tig00397540	tig00397540_717753	6	41.215	41.215	AB	AB	AB	BB	AB	BB	AB	AA	AB	BB	AA	AB	BB	AB	AB	AA	AA	AB	BB	AB	AA	AA	BB	AA	BB	AB	AB	BB	AB	AB	BB	AB	AB	BB	AA	AB	AB	BB	AB	BB	BB	AA	AB	BB
2776	tig00397540	tig00397540_717758	6	41.215	41.215	AB	AB	AB	BB	AB	BB	AB	AA	AB	BB	AA	AB	BB	AB	AB	AA	AA	AB	BB	AB	AA	AA	BB	AA	BB	AB	AB	BB	AB	AB	BB	AB	AB	BB	AA	AB	AB	BB	AB	BB	BB	AA	AB	BB
2777	tig00397540	tig00397540_717790	6	41.215	41.215	AB	AB	AB	BB	AB	BB	AB	AA	AB	BB	AA	AB	BB	AB	AB	AA	AA	AB	BB	AB	AA	AA	BB	AA	BB	AB	AB	BB	AB	AB	BB	AB	AB	BB	AA	AB	AB	BB	AB	BB	BB	AA	AB	BB
2778	tig00397540	tig00397540_717826	6	41.215	41.215	AB	AB	AB	BB	AB	BB	AB	AA	AB	BB	AA	AB	BB	AB	AB	AA	AA	AB	BB	AB	AA	AA	BB	AA	BB	AB	AB	BB	AB	AB	BB	AB	AB	BB	AA	AB	AB	BB	AB	BB	BB	AA	AB	BB
2779	tig00397540	tig00397540_717837	6	41.215	41.215	AB	AB	AB	BB	AB	BB	AB	AA	AB	BB	AA	AB	BB	AB	AB	AA	AA	AB	BB	AB	AA	AA	BB	AA	BB	AB	AB	BB	AB	AB	BB	AB	AB	BB	AA	AB	AB	BB	AB	BB	BB	AA	AB	BB
2780	tig00397540	tig00397540_717845	6	41.215	41.215	AB	AB	AB	BB	AB	BB	AB	AA	AB	BB	AA	AB	BB	AB	AB	AA	AA	AB	BB	AB	AA	AA	BB	AA	BB	AB	AB	BB	AB	AB	BB	AB	AB	BB	AA	AB	AB	BB	AB	BB	BB	AA	AB	BB
2781	tig00397540	tig00397540_717848	6	41.215	41.215	AB	AB	AB	BB	AB	BB	AB	AA	AB	BB	AA	AB	BB	AB	AB	AA	AA	AB	BB	AB	AA	AA	BB	AA	BB	AB	AB	BB	AB	AB	BB	AB	AB	BB	AA	AB	AB	BB	AB	BB	BB	AA	AB	BB
2782	tig00397540	tig00397540_718589	6	41.215	41.215	AB	AB	AB	BB	AB	BB	AB	AA	AB	BB	AA	AB	BB	AB	AB	AA	AA	AB	BB	AB	AA	AA	BB	AA	BB	AB	AB	BB	AB	AB	BB	AB	AB	BB	AA	AB	AB	BB	AB	BB	BB	AA	AB	BB
2783	tig00397540	tig00397540_718602	6	41.215	41.215	AB	AB	AB	BB	AB	BB	AB	AA	AB	BB	AA	AB	BB	AB	AB	AA	AA	AB	BB	AB	AA	AA	BB	AA	BB	AB	AB	BB	AB	AB	BB	AB	AB	BB	AA	AB	AB	BB	AB	BB	BB	AA	AB	BB
2784	tig00397540	tig00397540_718714	6	41.215	41.215	AB	AB	AB	BB	AB	BB	AB	AA	AB	BB	AA	AB	BB	AB	AB	AA	AA	AB	BB	AB	AA	AA	BB	AA	BB	AB	AB	BB	AB	AB	BB	AB	AB	BB	AA	AB	AB	BB	AB	BB	BB	AA	AB	BB
2785	tig00397540	tig00397540_718726	6	41.215	41.215	AB	AB	AB	BB	AB	BB	AB	AA	AB	BB	AA	AB	BB	AB	AB	AA	AA	AB	BB	AB	AA	AA	BB	AA	BB	AB	AB	BB	AB	AB	BB	AB	AB	BB	AA	AB	AB	BB	AB	BB	BB	AA	AB	BB
2786	tig00397540	tig00397540_718736	6	41.215	41.215	AB	AB	AB	BB	AB	BB	AB	AA	AB	BB	AA	AB	BB	AB	AB	AA	AA	AB	BB	AB	AA	AA	BB	AA	BB	AB	AB	BB	AB	AB	BB	AB	AB	BB	AA	AB	AB	BB	AB	BB	BB	AA	AB	BB
2787	tig00397540	tig00397540_725060	6	41.215	41.215	AB	AB	AB	BB	AB	BB	AB	AA	AB	BB	AA	AB	BB	AB	AB	AA	AA	AB	BB	AB	AA	AA	BB	AA	BB	AB	AB	BB	AB	AB	BB	AB	AB	BB	AA	AB	AB	BB	AB	BB	BB	AA	AB	BB
2788	tig00397540	tig00397540_725871	6	41.215	41.215	AB	AB	AB	BB	AB	BB	AB	AA	AB	BB	AA	AB	BB	AB	AB	AA	AA	AB	BB	AB	AA	AA	BB	AA	BB	AB	AB	BB	AB	AB	BB	AB	AB	BB	AA	AB	AB	BB	AB	BB	BB	AA	AB	BB
2789	tig00397540	tig00397540_735457	6	41.215	41.215	AB	AB	AB	BB	AB	BB	AB	AA	AB	BB	AA	AB	BB	AB	AB	AA	AA	AB	BB	AB	AA	AA	BB	AA	BB	AB	AB	BB	AB	AB	BB	AB	AB	BB	AA	AB	AB	BB	AB	BB	BB	AA	AB	BB
2790	tig00397540	tig00397540_735533	6	41.215	41.215	AB	AB	AB	BB	AB	BB	AB	AA	AB	BB	AA	AB	BB	AB	AB	AA	AA	AB	BB	AB	AA	AA	BB	AA	BB	AB	AB	BB	AB	AB	BB	AB	AB	BB	AA	AB	AB	BB	AB	BB	BB	AA	AB	BB
2791	tig00397540	tig00397540_735674	6	41.215	41.215	AB	AB	AB	BB	AB	BB	AB	AA	AB	BB	AA	AB	BB	AB	AB	AA	AA	AB	BB	AB	AA	AA	BB	AA	BB	AB	AB	BB	AB	AB	BB	AB	AB	BB	AA	AB	AB	BB	AB	BB	BB	AA	AB	BB
2792	tig00397540	tig00397540_735701	6	41.215	41.215	AB	AB	AB	BB	AB	BB	AB	AA	AB	BB	AA	AB	BB	AB	AB	AA	AA	AB	BB	AB	AA	AA	BB	AA	BB	AB	AB	BB	AB	AB	BB	AB	AB	BB	AA	AB	AB	BB	AB	BB	BB	AA	AB	BB
2830	ctg5275	ctg5275_22946	12	14.187	14.187	AB	AB	BB	AB	AA	BB	AB	AB	AB	AA	BB	BB	AB	AB	AB	AB	AB	AB	AB	AB	AA	AB	AA	AB	BB	BB	AB	AA	BB	AA	AB	AA	BB	AA	AB	AB	AB	AB	AA	BB	AB	AB	AB	AA
2831	ctg5275	ctg5275_22952	12	14.187	14.187	AB	AB	BB	AB	AA	BB	AB	AB	AB	AA	BB	BB	AB	AB	AB	AB	AB	AB	AB	AB	AA	AB	AA	AB	BB	BB	AB	AA	BB	AA	AB	AA	BB	AA	AB	AB	AB	AB	AA	BB	AB	AB	AB	AA
2832	ctg5275	ctg5275_23956	12	3.374	3.374	AB	AB	BB	AB	AA	BB	AB	AB	AB	AA	BB	BB	AB	BB	AB	BB	BB	BB	AB	BB	AA	AB	AA	AB	BB	BB	BB	AA	BB	AB	AB	AA	BB	AA	AB	BB	BB	AB	AA	BB	AB	BB	AA	AA
2833	ctg5275	ctg5275_28848	12	11.493	11.493	AB	AB	BB	AB	AA	BB	AB	AB	AB	AA	BB	BB	AB	AB	AB	BB	AB	BB	AB	AB	AA	AB	AA	AB	BB	BB	AB	AA	BB	AA	AB	AA	BB	AA	AB	AB	AB	AB	AA	BB	AB	BB	AA	AA
2834	ctg5275	ctg5275_28936	12	14.187	14.187	AB	AB	BB	AB	AA	BB	AB	AB	AB	AA	BB	BB	AB	AB	AB	AB	AB	AB	AB	AB	AA	AB	AA	AB	BB	BB	AB	AA	BB	AA	AB	AA	BB	AA	AB	AB	AB	AB	AA	BB	AB	AB	AB	AA
2835	ctg5275	ctg5275_28942	12	6.114	6.114	AB	AB	BB	AB	AA	BB	AB	AB	AB	AA	BB	BB	AB	BB	AB	BB	BB	BB	AB	BB	AA	AB	AA	AB	BB	BB	BB	AA	BB	AB	AB	AA	BB	AA	AB	BB	BB	AB	AA	BB	AB	BB	AA	AA
2836	ctg5275	ctg5275_31614	12	14.187	14.187	AB	AB	BB	AB	AA	BB	AB	AB	AB	AA	BB	BB	AB	AB	AB	AB	AB	AB	AB	AB	AA	AB	AA	AB	BB	BB	AB	AA	BB	AA	AB	AA	BB	AA	AB	AB	AB	AB	AA	BB	AB	AB	AB	AA
2837	ctg5275	ctg5275_31622	12	14.187	14.187	AB	AB	BB	AB	AA	BB	AB	AB	AB	AA	BB	BB	AB	AB	AB	AB	AB	AB	AB	AB	AA	AB	AA	AB	BB	BB	AB	AA	BB	AA	AB	AA	BB	AA	AB	AB	AB	AB	AA	BB	AB	AB	AB	AA
2838	ctg5275	ctg5275_31632	12	14.187	14.187	AB	AB	BB	AB	AA	BB	AB	AB	AB	AA	BB	BB	AB	AB	AB	AB	AB	AB	AB	AB	AA	AB	AA	AB	BB	BB	AB	AA	BB	AA	AB	AA	BB	AA	AB	AB	AB	AB	AA	BB	AB	AB	AB	AA
2839	ctg5275	ctg5275_31884	12	14.187	14.187	AB	AB	BB	AB	AA	BB	AB	AB	AB	AA	BB	BB	AB	AB	AB	AB	AB	AB	AB	AB	AA	AB	AA	AB	BB	BB	AB	AA	BB	AA	AB	AA	BB	AA	AB	AB	AB	AB	AA	BB	AB	AB	AB	AA
2840	ctg5275	ctg5275_31980	12	14.187	14.187	AB	AB	BB	AB	AA	BB	AB	AB	AB	AA	BB	BB	AB	AB	AB	AB	AB	AB	AB	AB	AA	AB	AA	AB	BB	BB	AB	AA	BB	AA	AB	AA	BB	AA	AB	AB	AB	AB	AA	BB	AB	AB	AB	AA
2841	ctg5275	ctg5275_32143	12	14.187	14.187	AB	AB	BB	AB	AA	BB	AB	AB	AB	AA	BB	BB	AB	AB	AB	AB	AB	AB	AB	AB	AA	AB	AA	AB	BB	BB	AB	AA	BB	AA	AB	AA	BB	AA	AB	AB	AB	AB	AA	BB	AB	AB	AB	AA
2843	ctg5275	ctg5275_34740	12	12.844	12.844	AB	AB	BB	AB	AA	BB	AB	AB	AB	AA	BB	BB	AB	AB	AB	AB	AB	AB	AB	AB	AA	AB	AA	AB	BB	BB	AB	AA	BB	AA	AB	AA	BB	AA	AB	AB	AB	AB	AA	BB	AB	BB	AA	AA
2844	ctg5275	ctg5275_34902	12	14.187	14.187	AB	AB	BB	AB	AA	BB	AB	AB	AB	AA	BB	BB	AB	AB	AB	AB	AB	AB	AB	AB	AA	AB	AA	AB	BB	BB	AB	AA	BB	AA	AB	AA	BB	AA	AB	AB	AB	AB	AA	BB	AB	AB	AB	AA
2845	ctg5275	ctg5275_34997	12	14.187	14.187	AB	AB	BB	AB	AA	BB	AB	AB	AB	AA	BB	BB	AB	AB	AB	AB	AB	AB	AB	AB	AA	AB	AA	AB	BB	BB	AB	AA	BB	AA	AB	AA	BB	AA	AB	AB	AB	AB	AA	BB	AB	AB	AB	AA
2846	ctg5275	ctg5275_35057	12	12.844	12.844	AB	AB	BB	AB	AA	BB	AB	AB	AB	AA	BB	BB	AB	AB	AB	AB	AB	AB	AB	AB	AA	AB	AA	AB	BB	BB	AB	AA	BB	AA	AB	AA	BB	AA	AB	AB	AB	AB	AA	BB	AB	BB	AA	AA
2847	ctg5275	ctg5275_41270	12	14.187	14.187	AB	AB	BB	AB	AA	BB	AB	AB	AB	AA	BB	BB	AB	AB	AB	AB	AB	AB	AB	AB	AA	AB	AA	AB	BB	BB	AB	AA	BB	AA	AB	AA	BB	AA	AB	AB	AB	AB	AA	BB	AB	AB	AB	AA
2848	ctg5275	ctg5275_41274	12	14.187	14.187	AB	AB	BB	AB	AA	BB	AB	AB	AB	AA	BB	BB	AB	AB	AB	AB	AB	AB	AB	AB	AA	AB	AA	AB	BB	BB	AB	AA	BB	AA	AB	AA	BB	AA	AB	AB	AB	AB	AA	BB	AB	AB	AB	AA
2849	ctg5275	ctg5275_41480	12	16.871	16.871	AB	AB	BB	AB	AA	AB	AA	AB	AB	AA	BB	BB	AB	AB	AB	AB	AB	AB	AB	AB	AA	AB	AA	AB	BB	BB	AB	AA	BB	AB	AB	AA	BB	AA	AB	AB	AB	AB	AA	BB	AB	AB	AB	AA
2850	ctg5275	ctg5275_42798	12	14.187	14.187	AB	AB	BB	AB	AA	BB	AB	AB	AB	AA	BB	BB	AB	AB	AB	AB	AB	AB	AB	AB	AA	AB	AA	AB	BB	BB	AB	AA	BB	AA	AB	AA	BB	AA	AB	AB	AB	AB	AA	BB	AB	AB	AB	AA
2851	ctg5275	ctg5275_42823	12	14.187	14.187	AB	AB	BB	AB	AA	BB	AB	AB	AB	AA	BB	BB	AB	AB	AB	AB	AB	AB	AB	AB	AA	AB	AA	AB	BB	BB	AB	AA	BB	AA	AB	AA	BB	AA	AB	AB	AB	AB	AA	BB	AB	AB	AB	AA
2852	ctg5275	ctg5275_42841	12	14.187	14.187	AB	AB	BB	AB	AA	BB	AB	AB	AB	AA	BB	BB	AB	AB	AB	AB	AB	AB	AB	AB	AA	AB	AA	AB	BB	BB	AB	AA	BB	AA	AB	AA	BB	AA	AB	AB	AB	AB	AA	BB	AB	AB	AB	AA
2853	ctg5275	ctg5275_43139	12	14.187	14.187	AB	AB	BB	AB	AA	BB	AB	AB	AB	AA	BB	BB	AB	AB	AB	AB	AB	AB	AB	AB	AA	AB	AA	AB	BB	BB	AB	AA	BB	AA	AB	AA	BB	AA	AB	AB	AB	AB	AA	BB	AB	AB	AB	AA
2854	ctg5275	ctg5275_43229	12	14.187	14.187	AB	AB	BB	AB	AA	BB	AB	AB	AB	AA	BB	BB	AB	AB	AB	AB	AB	AB	AB	AB	AA	AB	AA	AB	BB	BB	AB	AA	BB	AA	AB	AA	BB	AA	AB	AB	AB	AB	AA	BB	AB	AB	AB	AA
2855	ctg5275	ctg5275_43940	12	14.187	14.187	AB	AB	BB	AB	AA	BB	AB	AB	AB	AA	BB	BB	AB	AB	AB	AB	AB	AB	AB	AB	AA	AB	AA	AB	BB	BB	AB	AA	BB	AA	AB	AA	BB	AA	AB	AB	AB	AB	AA	BB	AB	AB	AB	AA
2856	ctg5275	ctg5275_46205	12	12.844	12.844	AB	AB	BB	AB	AA	BB	AB	AB	AB	AA	BB	BB	AB	AB	AB	AB	AB	AB	AB	AB	AA	AB	AA	AB	BB	BB	AB	AA	BB	AA	AB	AA	BB	AA	AB	AB	AB	AB	AA	BB	AB	BB	AA	AA
2857	ctg5275	ctg5275_46212	12	12.844	12.844	AB	AB	BB	AB	AA	BB	AB	AB	AB	AA	BB	BB	AB	AB	AB	AB	AB	AB	AB	AB	AA	AB	AA	AB	BB	BB	AB	AA	BB	AA	AB	AA	BB	AA	AB	AB	AB	AB	AA	BB	AB	BB	AA	AA
2858	ctg5275	ctg5275_46265	12	10.15	10.15	AB	AB	BB	AB	AA	BB	AB	AB	AB	AA	BB	BB	AB	AB	AB	BB	AB	BB	AB	BB	AA	AB	AA	AB	BB	BB	AB	AA	BB	AA	AB	AA	BB	AA	AB	AB	BB	AB	AA	BB	AB	BB	AA	AA
2859	ctg5275	ctg5275_46282	12	12.844	12.844	AB	AB	BB	AB	AA	BB	AB	AB	AB	AA	BB	BB	AB	AB	AB	AB	AB	AB	AB	AB	AA	AB	AA	AB	BB	BB	AB	AA	BB	AA	AB	AA	BB	AA	AB	AB	AB	AB	AA	BB	AB	BB	AA	AA
2860	ctg5275	ctg5275_46290	12	12.844	12.844	AB	AB	BB	AB	AA	BB	AB	AB	AB	AA	BB	BB	AB	AB	AB	AB	AB	AB	AB	AB	AA	AB	AA	AB	BB	BB	AB	AA	BB	AA	AB	AA	BB	AA	AB	AB	AB	AB	AA	BB	AB	BB	AA	AA
2861	ctg5275	ctg5275_46709	12	14.858	14.858	AB	AB	BB	AB	AA	BB	AA	AB	AB	AA	BB	BB	AB	AB	AB	AB	AB	AB	AB	AB	AA	AB	AA	AB	BB	BB	AB	AA	BB	AA	AB	AA	BB	AA	AB	AB	AB	AB	AA	BB	AB	AB	AB	AA
2862	ctg5275	ctg5275_48381	12	14.187	14.187	AB	AB	BB	AB	AA	BB	AB	AB	AB	AA	BB	BB	AB	AB	AB	AB	AB	AB	AB	AB	AA	AB	AA	AB	BB	BB	AB	AA	BB	AA	AB	AA	BB	AA	AB	AB	AB	AB	AA	BB	AB	AB	AB	AA
2863	ctg5275	ctg5275_48476	12	14.187	14.187	AB	AB	BB	AB	AA	BB	AB	AB	AB	AA	BB	BB	AB	AB	AB	AB	AB	AB	AB	AB	AA	AB	AA	AB	BB	BB	AB	AA	BB	AA	AB	AA	BB	AA	AB	AB	AB	AB	AA	BB	AB	AB	AB	AA
2864	ctg5275	ctg5275_49464	12	14.187	14.187	AB	AB	BB	AB	AA	BB	AB	AB	AB	AA	BB	BB	AB	AB	AB	AB	AB	AB	AB	AB	AA	AB	AA	AB	BB	BB	AB	AA	BB	AA	AB	AA	BB	AA	AB	AB	AB	AB	AA	BB	AB	AB	AB	AA
2865	ctg5275	ctg5275_49475	12	14.187	14.187	AB	AB	BB	AB	AA	BB	AB	AB	AB	AA	BB	BB	AB	AB	AB	AB	AB	AB	AB	AB	AA	AB	AA	AB	BB	BB	AB	AA	BB	AA	AB	AA	BB	AA	AB	AB	AB	AB	AA	BB	AB	AB	AB	AA
2866	ctg5275	ctg5275_49651	12	14.187	14.187	AB	AB	BB	AB	AA	BB	AB	AB	AB	AA	BB	BB	AB	AB	AB	AB	AB	AB	AB	AB	AA	AB	AA	AB	BB	BB	AB	AA	BB	AA	AB	AA	BB	AA	AB	AB	AB	AB	AA	BB	AB	AB	AB	AA
2867	ctg5275	ctg5275_49683	12	14.187	14.187	AB	AB	BB	AB	AA	BB	AB	AB	AB	AA	BB	BB	AB	AB	AB	AB	AB	AB	AB	AB	AA	AB	AA	AB	BB	BB	AB	AA	BB	AA	AB	AA	BB	AA	AB	AB	AB	AB	AA	BB	AB	AB	AB	AA
2868	ctg5275	ctg5275_49958	12	14.187	14.187	AB	AB	BB	AB	AA	BB	AB	AB	AB	AA	BB	BB	AB	AB	AB	AB	AB	AB	AB	AB	AA	AB	AA	AB	BB	BB	AB	AA	BB	AA	AB	AA	BB	AA	AB	AB	AB	AB	AA	BB	AB	AB	AB	AA
2869	ctg5275	ctg5275_50096	12	14.187	14.187	AB	AB	BB	AB	AA	BB	AB	AB	AB	AA	BB	BB	AB	AB	AB	AB	AB	AB	AB	AB	AA	AB	AA	AB	BB	BB	AB	AA	BB	AA	AB	AA	BB	AA	AB	AB	AB	AB	AA	BB	AB	AB	AB	AA
2870	ctg5275	ctg5275_52650	12	14.187	14.187	AB	AB	BB	AB	AA	BB	AB	AB	AB	AA	BB	BB	AB	AB	AB	AB	AB	AB	AB	AB	AA	AB	AA	AB	BB	BB	AB	AA	BB	AA	AB	AA	BB	AA	AB	AB	AB	AB	AA	BB	AB	AB	AB	AA
2871	ctg5275	ctg5275_62533	12	14.187	14.187	AB	AB	BB	AB	AA	BB	AB	AB	AB	AA	BB	BB	AB	AB	AB	AB	AB	AB	AB	AB	AA	AB	AA	AB	BB	BB	AB	AA	BB	AA	AB	AA	BB	AA	AB	AB	AB	AB	AA	BB	AB	AB	AB	AA
2872	ctg5275	ctg5275_62624	12	14.187	14.187	AB	AB	BB	AB	AA	BB	AB	AB	AB	AA	BB	BB	AB	AB	AB	AB	AB	AB	AB	AB	AA	AB	AA	AB	BB	BB	AB	AA	BB	AA	AB	AA	BB	AA	AB	AB	AB	AB	AA	BB	AB	AB	AB	AA
2874	ctg5275	ctg5275_62649	12	10.822	10.822	AB	AB	BB	AB	AA	BB	AB	AB	AB	AA	BB	BB	AB	AB	AB	BB	AB	BB	AB	AB	AA	AB	AA	AB	BB	BB	AB	AA	BB	AA	AB	AA	BB	AA	AB	AB	BB	AB	AA	BB	AB	BB	AA	AA
2876	ctg5275	ctg5275_62698	12	14.187	14.187	AB	AB	BB	AB	AA	BB	AB	AB	AB	AA	BB	BB	AB	AB	AB	AB	AB	AB	AB	AB	AA	AB	AA	AB	BB	BB	AB	AA	BB	AA	AB	AA	BB	AA	AB	AB	AB	AB	AA	BB	AB	AB	AB	AA
2877	ctg5275	ctg5275_62706	12	14.187	14.187	AB	AB	BB	AB	AA	BB	AB	AB	AB	AA	BB	BB	AB	AB	AB	AB	AB	AB	AB	AB	AA	AB	AA	AB	BB	BB	AB	AA	BB	AA	AB	AA	BB	AA	AB	AB	AB	AB	AA	BB	AB	AB	AB	AA
2878	ctg5275	ctg5275_62717	12	12.844	12.844	AB	AB	BB	AB	AA	BB	AB	AB	AB	AA	BB	BB	AB	AB	AB	AB	AB	AB	AB	AB	AA	AB	AA	AB	BB	BB	AB	AA	BB	AA	AB	AA	BB	AA	AB	AB	AB	AB	AA	BB	AB	BB	AA	AA
2879	ctg5275	ctg5275_62722	12	12.844	12.844	AB	AB	BB	AB	AA	BB	AB	AB	AB	AA	BB	BB	AB	AB	AB	AB	AB	AB	AB	AB	AA	AB	AA	AB	BB	BB	AB	AA	BB	AA	AB	AA	BB	AA	AB	AB	AB	AB	AA	BB	AB	BB	AA	AA
2880	ctg5275	ctg5275_62840	12	14.187	14.187	AB	AB	BB	AB	AA	BB	AB	AB	AB	AA	BB	BB	AB	AB	AB	AB	AB	AB	AB	AB	AA	AB	AA	AB	BB	BB	AB	AA	BB	AA	AB	AA	BB	AA	AB	AB	AB	AB	AA	BB	AB	AB	AB	AA
2881	ctg5275	ctg5275_64880	12	14.187	14.187	AB	AB	BB	AB	AA	BB	AB	AB	AB	AA	BB	BB	AB	AB	AB	AB	AB	AB	AB	AB	AA	AB	AA	AB	BB	BB	AB	AA	BB	AA	AB	AA	BB	AA	AB	AB	AB	AB	AA	BB	AB	AB	AB	AA
2882	ctg5275	ctg5275_75055	12	14.187	14.187	AB	AB	BB	AB	AA	BB	AB	AB	AB	AA	BB	BB	AB	AB	AB	AB	AB	AB	AB	AB	AA	AB	AA	AB	BB	BB	AB	AA	BB	AA	AB	AA	BB	AA	AB	AB	AB	AB	AA	BB	AB	AB	AB	AA
2883	ctg5275	ctg5275_75083	12	14.187	14.187	AB	AB	BB	AB	AA	BB	AB	AB	AB	AA	BB	BB	AB	AB	AB	AB	AB	AB	AB	AB	AA	AB	AA	AB	BB	BB	AB	AA	BB	AA	AB	AA	BB	AA	AB	AB	AB	AB	AA	BB	AB	AB	AB	AA
2884	ctg5275	ctg5275_75254	12	14.187	14.187	AB	AB	BB	AB	AA	BB	AB	AB	AB	AA	BB	BB	AB	AB	AB	AB	AB	AB	AB	AB	AA	AB	AA	AB	BB	BB	AB	AA	BB	AA	AB	AA	BB	AA	AB	AB	AB	AB	AA	BB	AB	AB	AB	AA
2885	ctg5275	ctg5275_76105	12	14.187	14.187	AB	AB	BB	AB	AA	BB	AB	AB	AB	AA	BB	BB	AB	AB	AB	AB	AB	AB	AB	AB	AA	AB	AA	AB	BB	BB	AB	AA	BB	AA	AB	AA	BB	AA	AB	AB	AB	AB	AA	BB	AB	AB	AB	AA
2886	ctg5275	ctg5275_76150	12	14.187	14.187	AB	AB	BB	AB	AA	BB	AB	AB	AB	AA	BB	BB	AB	AB	AB	AB	AB	AB	AB	AB	AA	AB	AA	AB	BB	BB	AB	AA	BB	AA	AB	AA	BB	AA	AB	AB	AB	AB	AA	BB	AB	AB	AB	AA
2887	ctg5275	ctg5275_76376	12	14.187	14.187	AB	AB	BB	AB	AA	BB	AB	AB	AB	AA	BB	BB	AB	AB	AB	AB	AB	AB	AB	AB	AA	AB	AA	AB	BB	BB	AB	AA	BB	AA	AB	AA	BB	AA	AB	AB	AB	AB	AA	BB	AB	AB	AB	AA
2888	ctg5275	ctg5275_81485	12	14.187	14.187	AB	AB	BB	AB	AA	BB	AB	AB	AB	AA	BB	BB	AB	AB	AB	AB	AB	AB	AB	AB	AA	AB	AA	AB	BB	BB	AB	AA	BB	AA	AB	AA	BB	AA	AB	AB	AB	AB	AA	BB	AB	AB	AB	AA
2889	ctg5275	ctg5275_81766	12	14.187	14.187	AB	AB	BB	AB	AA	BB	AB	AB	AB	AA	BB	BB	AB	AB	AB	AB	AB	AB	AB	AB	AA	AB	AA	AB	BB	BB	AB	AA	BB	AA	AB	AA	BB	AA	AB	AB	AB	AB	AA	BB	AB	AB	AB	AA
2890	ctg5275	ctg5275_90224	12	14.187	14.187	AB	AB	BB	AB	AA	BB	AB	AB	AB	AA	BB	BB	AB	AB	AB	AB	AB	AB	AB	AB	AA	AB	AA	AB	BB	BB	AB	AA	BB	AA	AB	AA	BB	AA	AB	AB	AB	AB	AA	BB	AB	AB	AB	AA
2892	ctg5274	ctg5274_58747	5	33.1	33.1	AB	AB	AA	BB	AB	BB	AA	AB	BB	AB	AB	AB	AB	AB	BB	AA	AA	AA	AB	AA	AA	AB	AB	AB	AB	BB	AB	BB	AB	BB	BB	BB	AB	AB	BB	AB	BB	AB	AB	AB	AA	AA	AA	AB
2893	ctg5274	ctg5274_58751	5	33.1	33.1	AB	AB	AA	BB	AB	BB	AA	AB	BB	AB	AB	AB	AB	AB	BB	AA	AA	AA	AB	AA	AA	AB	AB	AB	AB	BB	AB	BB	AB	BB	BB	BB	AB	AB	BB	AB	BB	AB	AB	AB	AA	AA	AA	AB
2894	ctg5274	ctg5274_58858	5	33.1	33.1	AB	AB	AA	BB	AB	BB	AA	AB	BB	AB	AB	AB	AB	AB	BB	AA	AA	AA	AB	AA	AA	AB	AB	AB	AB	BB	AB	BB	AB	BB	BB	BB	AB	AB	BB	AB	BB	AB	AB	AB	AA	AA	AA	AB
2895	ctg5274	ctg5274_58908	5	33.1	33.1	AB	AB	AA	BB	AB	BB	AA	AB	BB	AB	AB	AB	AB	AB	BB	AA	AA	AA	AB	AA	AA	AB	AB	AB	AB	BB	AB	BB	AB	BB	BB	BB	AB	AB	BB	AB	BB	AB	AB	AB	AA	AA	AA	AB
2896	ctg5274	ctg5274_87918	5	32.429	32.429	AB	AB	AA	BB	AB	BB	AA	AB	BB	AB	AB	AB	AB	AB	BB	AA	AA	AA	AB	AA	AA	AB	AB	AB	AB	BB	AB	BB	AB	BB	BB	BB	AB	AB	BB	AB	BB	AB	AB	AB	AA	AA	AA	AB
2897	ctg5274	ctg5274_93922	5	32.429	32.429	AB	AB	AA	BB	AB	BB	AA	AB	BB	AB	AB	AB	AB	AB	BB	AA	AA	AA	AB	AA	AA	AB	AB	AB	AB	BB	AB	BB	AB	BB	BB	BB	AB	AB	BB	AB	BB	AB	AB	AB	AA	AA	AA	AB
2898	ctg5274	ctg5274_94229	5	32.429	32.429	AB	AB	AA	BB	AB	BB	AA	AB	BB	AB	AB	AB	AB	AB	BB	AA	AA	AA	AB	AA	AA	AB	AB	AB	AB	BB	AB	BB	AB	BB	BB	BB	AB	AB	BB	AB	BB	AB	AB	AB	AA	AA	AA	AB
2899	ctg5274	ctg5274_102702	5	33.1	33.1	AB	AB	AA	BB	AB	BB	AA	AB	BB	AB	AB	AB	AB	AB	BB	AA	AA	AA	AB	AA	AA	AB	AB	AB	AB	BB	AB	BB	AB	BB	BB	BB	AB	AB	BB	AB	BB	AB	AB	AB	AA	AA	AA	AB
2900	ctg5274	ctg5274_102790	5	33.1	33.1	AB	AB	AA	BB	AB	BB	AA	AB	BB	AB	AB	AB	AB	AB	BB	AA	AA	AA	AB	AA	AA	AB	AB	AB	AB	BB	AB	BB	AB	BB	BB	BB	AB	AB	BB	AB	BB	AB	AB	AB	AA	AA	AA	AB
2901	ctg5274	ctg5274_102876	5	33.1	33.1	AB	AB	AA	BB	AB	BB	AA	AB	BB	AB	AB	AB	AB	AB	BB	AA	AA	AA	AB	AA	AA	AB	AB	AB	AB	BB	AB	BB	AB	BB	BB	BB	AB	AB	BB	AB	BB	AB	AB	AB	AA	AA	AA	AB
2902	ctg5274	ctg5274_102968	5	32.429	32.429	AB	AB	AA	BB	AB	BB	AA	AB	BB	AB	AB	AB	AB	AB	BB	AA	AA	AA	AB	AA	AA	AB	AB	AB	AB	BB	AB	BB	AB	BB	BB	BB	AB	AB	BB	AB	BB	AB	AB	AB	AA	AA	AA	AB
2903	ctg5274	ctg5274_110577	5	32.429	32.429	AB	AB	AA	BB	AB	BB	AA	AB	BB	AB	AB	AB	AB	AB	BB	AA	AA	AA	AB	AA	AA	AB	AB	AB	AB	BB	AB	BB	AB	BB	BB	BB	AB	AB	BB	AB	BB	AB	AB	AB	AA	AA	AA	AB
2904	ctg5274	ctg5274_110897	5	33.1	33.1	AB	AB	AA	BB	AB	BB	AA	AB	BB	AB	AB	AB	AB	AB	BB	AA	AA	AA	AB	AA	AA	AB	AB	AB	AB	BB	AB	BB	AB	BB	BB	BB	AB	AB	BB	AB	BB	AB	AB	AB	AA	AA	AA	AB
2905	ctg5274	ctg5274_110910	5	32.429	32.429	AB	AB	AA	BB	AB	BB	AA	AB	BB	AB	AB	AB	AB	AB	BB	AA	AA	AA	AB	AA	AA	AB	AB	AB	AB	BB	AB	BB	AB	BB	BB	BB	AB	AB	BB	AB	BB	AB	AB	AB	AA	AA	AA	AB
2906	ctg5274	ctg5274_113671	5	32.429	32.429	AB	AB	AA	BB	AB	BB	AA	AB	BB	AB	AB	AB	AB	AB	BB	AA	AA	AA	AB	AA	AA	AB	AB	AB	AB	BB	AB	BB	AB	BB	BB	BB	AB	AB	BB	AB	BB	AB	AB	AB	AA	AA	AA	AB
2907	ctg5274	ctg5274_113908	5	32.429	32.429	AB	AB	AA	BB	AB	BB	AA	AB	BB	AB	AB	AB	AB	AB	BB	AA	AA	AA	AB	AA	AA	AB	AB	AB	AB	BB	AB	BB	AB	BB	BB	BB	AB	AB	BB	AB	BB	AB	AB	AB	AA	AA	AA	AB
2908	ctg5274	ctg5274_113909	5	32.429	32.429	AB	AB	AA	BB	AB	BB	AA	AB	BB	AB	AB	AB	AB	AB	BB	AA	AA	AA	AB	AA	AA	AB	AB	AB	AB	BB	AB	BB	AB	BB	BB	BB	AB	AB	BB	AB	BB	AB	AB	AB	AA	AA	AA	AB
2909	ctg5271	ctg5271_5919	1	95.965	95.965	AB	AB	AA	AB	BB	AB	BB	AB	BB	AB	AB	AB	AB	BB	AB	AA	AB	AB	BB	AA	AB	AB	AA	BB	BB	BB	AB	AB	AB	AA	BB	AB	AB	AB	BB	BB	AB	AB	BB	AB	AB	AB	BB	AB
2910	ctg5271	ctg5271_30356	1	95.965	95.965	AB	AB	AA	AB	BB	AB	BB	AB	BB	AB	AB	AB	AB	BB	AB	AA	AB	AB	BB	AA	AB	AB	AA	BB	BB	BB	AB	AB	AB	AA	BB	AB	AB	AB	BB	BB	AB	AB	BB	AB	AB	AB	BB	AB
2911	ctg5271	ctg5271_30360	1	95.965	95.965	AB	AB	AA	AB	BB	AB	BB	AB	BB	AB	AB	AB	AB	BB	AB	AA	AB	AB	BB	AA	AB	AB	AA	BB	BB	BB	AB	AB	AB	AA	BB	AB	AB	AB	BB	BB	AB	AB	BB	AB	AB	AB	BB	AB
2912	ctg5271	ctg5271_30845	1	95.965	95.965	AB	AB	AA	AB	BB	AB	BB	AB	BB	AB	AB	AB	AB	BB	AB	AA	AB	AB	BB	AA	AB	AB	AA	BB	BB	BB	AB	AB	AB	AA	BB	AB	AB	AB	BB	BB	AB	AB	BB	AB	AB	AB	BB	AB
2913	ctg5271	ctg5271_31032	1	95.965	95.965	AB	AB	AA	AB	BB	AB	BB	AB	BB	AB	AB	AB	AB	BB	AB	AA	AB	AB	BB	AA	AB	AB	AA	BB	BB	BB	AB	AB	AB	AA	BB	AB	AB	AB	BB	BB	AB	AB	BB	AB	AB	AB	BB	AB
2914	ctg5271	ctg5271_38047	1	95.965	95.965	AB	AB	AA	AB	BB	AB	BB	AB	BB	AB	AB	AB	AB	BB	AB	AA	AB	AB	BB	AA	AB	AB	AA	BB	BB	BB	AB	AB	AB	AA	BB	AB	AB	AB	BB	BB	AB	AB	BB	AB	AB	AB	BB	AB
2915	ctg5271	ctg5271_38583	1	95.965	95.965	AB	AB	AA	AB	BB	AB	BB	AB	BB	AB	AB	AB	AB	BB	AB	AA	AB	AB	BB	AA	AB	AB	AA	BB	BB	BB	AB	AB	AB	AA	BB	AB	AB	AB	BB	BB	AB	AB	BB	AB	AB	AB	BB	AB
2916	ctg5271	ctg5271_42182	1	95.965	95.965	AB	AB	AA	AB	BB	AB	BB	AB	BB	AB	AB	AB	AB	BB	AB	AA	AB	AB	BB	AA	AB	AB	AA	BB	BB	BB	AB	AB	AB	AA	BB	AB	AB	AB	BB	BB	AB	AB	BB	AB	AB	AB	BB	AB
2917	ctg5271	ctg5271_66709	1	95.965	95.965	AB	AB	AA	AB	BB	AB	BB	AB	BB	AB	AB	AB	AB	BB	AB	AA	AB	AB	BB	AA	AB	AB	AA	BB	BB	BB	AB	AB	AB	AA	BB	AB	AB	AB	BB	BB	AB	AB	BB	AB	AB	AB	BB	AB
2918	ctg5271	ctg5271_66925	1	95.965	95.965	AB	AB	AA	AB	BB	AB	BB	AB	BB	AB	AB	AB	AB	BB	AB	AA	AB	AB	BB	AA	AB	AB	AA	BB	BB	BB	AB	AB	AB	AA	BB	AB	AB	AB	BB	BB	AB	AB	BB	AB	AB	AB	BB	AB
[truncated: 213,594+ more rows]
[truncated: 33 more columns]
