# Supplementary material for: Fine mapping of the Cepaea nemoralis shell colour and mid-banded loci using a high-density linkage map
Source: Research Square preprint supplement (doi:10.21203/rs.3.rs-2760735/v1), 2023-04-28
Supplement: Supplementary file 2 [file 750ac3e2c5ad1b3cf9cf0e15.xlsx]

## Sheet: Sheet1
Table S2:	Detailed overview of each linkage group
Linkage group	Linkage length (cM)	Percent of Linkage Map (cM)	Estimated size bp	Estimated size (Mbp)	Expected Length of LG in cM (Lengt +2S)	Percent of total Length (cM)	Density within Chromosome	No Linked SNPs	Percent of total SNPs	No SNPs per cM
1	151.477	0.070662	265370025	265.37	153.457	0.07016	0.00259793	59069	0.273984	384.922
2	92.538	0.0431677	54222847	54.2228	94.518	0.0432133	0.0088766	10648	0.0493894	112.656
3	104.53	0.0487618	105278048	105.278	106.51	0.048696	0.00642246	16584	0.0769227	155.704
4	136.175	0.0635238	52776994	52.777	138.155	0.0631639	0.0140373	9842	0.0456508	71.2388
5	70.106	0.0327035	52118598	52.1186	72.086	0.0329574	0.00792502	9096	0.0421906	126.183
6	134.518	0.0627508	73104556	73.1046	136.498	0.0624064	0.0113465	12030	0.0557996	88.1332
7	84.332	0.0393397	38826601	38.8266	86.312	0.0394615	0.0141472	6101	0.0282987	70.6854
8	126.841	0.0591696	70528303	70.5283	128.821	0.0588965	0.0120925	10653	0.0494126	82.6961
9	81.736	0.0381287	39318599	39.3186	83.716	0.0382746	0.0128893	6495	0.0301262	77.5837
10	89.208	0.0416143	45960468	45.9605	91.188	0.0416908	0.0100163	9104	0.0422277	99.8377
11	74.467	0.0347378	38693860	38.6939	76.447	0.0349513	0.0133044	5746	0.0266521	75.1632
12	109.443	0.0510537	36908561	36.9086	111.423	0.0509422	0.0214399	5197	0.0241056	46.6421
13	87.459	0.0407984	45709857	45.7099	89.439	0.0408912	0.0121653	7352	0.0341013	82.2013
14	104.521	0.0487576	58092363	58.0924	106.501	0.0486918	0.0129611	8217	0.0381135	77.1542
15	110.048	0.0513359	49677043	49.677	112.028	0.0512188	0.0255364	4387	0.0203485	39.1599
16	60.849	0.0283852	22321012	22.321	62.829	0.0287252	0.0125033	5025	0.0233078	79.979
17	90.251	0.0421009	39841230	39.8412	92.231	0.0421677	0.0250424	3683	0.0170831	39.9323
18	93.318	0.0435316	39183961	39.184	95.298	0.0435699	0.0184222	5173	0.0239943	54.2824
19	96.438	0.044987	59005185	59.0052	98.418	0.0449963	0.0097405	10104	0.0468661	102.664
20	116.552	0.0543699	45858571	45.8586	118.532	0.0541924	0.0169331	7000	0.0324686	59.0558
21	72.041	0.0336062	16740404	16.7404	74.021	0.0338421	0.0272136	2720	0.0126164	36.7463
22	56.837	0.0265137	13337027	13.337	58.817	0.0268909	0.0430263	1367	0.00634065	23.2416
Total	2143.68	1	1262874113	1262.87	2187.25	1	0.0153927	215593	1
Mean	97.4402			57.4034	99.4202			9799.68		90.2664
